# Supplementary material for: Os últimos dias de União Soviética : análise da série de reportagens “a segunda revolução”, de Zero Hora
Source: Royal Society of Chemistry journal article supplement (doi:10.1039/d4cc03483j), 2012-01-01

## *Supporting Information*

### **Divergent Synthesis of Pyrrolidone Fused Pyrimido[1,2-*b*]indazole through Selective Trapping of Enone Intermediate by 1*H*-indazol-3-amine**

Xi Shen,<sup>a</sup> Zhi-Cheng Yu,<sup>a</sup> You Zhou,<sup>a</sup> Yan-Dong Wu<sup>a</sup> and An-Xin Wu<sup>a, b\*</sup>

<sup>a</sup>National Key Laboratory of Green Pesticide, International Joint Research Center for Intelligent Biosensor Technology and Health, College of Chemistry, Central China Normal University, Wuhan 430079, People's Republic of China.

<sup>b</sup>State Key Laboratory of Applied Organic Chemistry, Lanzhou University, Lanzhou 730000, People's Republic of China.

E-mail: [chwuax@mail.ccnu.edu.cn](mailto:chwuax@mail.ccnu.edu.cn).

|                                                                                       |    |
|---------------------------------------------------------------------------------------|----|
| 1. General.....                                                                       | 2  |
| 2. Screening of reaction conditions.....                                              | 3  |
| 3. Synthesis steps and methods of operation .....                                     | 4  |
| 4. Testing of AIE properties of molecules .....                                       | 12 |
| 5. Mechanistic studies.....                                                           | 14 |
| 6. Characterization data for compounds .....                                          | 19 |
| 7. Crystallographic data and molecular structure of 4b and 5i .....                   | 49 |
| 8. <sup>1</sup> H, <sup>13</sup> C and <sup>19</sup> F NMR spectra of compounds ..... | 51 |

## 1. General

All the materials and solvents were commercially available and used without further purification. TLC analysis was performed using pre-coated glass plates. Column chromatography was performed using silica gel (200–300 mesh).  $^1\text{H}$  spectra were recorded in  $\text{CDCl}_3$  and  $\text{DMSO-}d_6$  on 400 MHz NMR spectrometers and resonances ( $\delta$ ) are given in parts per million relative to tetramethylsilane. Data are reported as follows: chemical shift, multiplicity (s = singlet, d = doublet, t = triplet, m = multiplet), coupling constants (Hz) and integration.  $^{13}\text{C}$  spectra were recorded in  $\text{CDCl}_3$  and  $\text{DMSO-}d_6$  on 100 MHz NMR spectrometers and resonances ( $\delta$ ) are given in ppm.  $^{19}\text{F}$  spectra were recorded in  $\text{CDCl}_3$  and  $\text{DMSO-}d_6$  on 376 MHz NMR using TMS as internal standard. HRMS were obtained on an Agilent LC1290-TOF 6224 equipped with an electrospray source. The X-ray crystal-structure determinations of **4b** and **5i** were obtained on a Bruker SMART APEX CCD system. Melting points were determined using XT-4 apparatus and not corrected.

## 2. Screening of reaction conditions

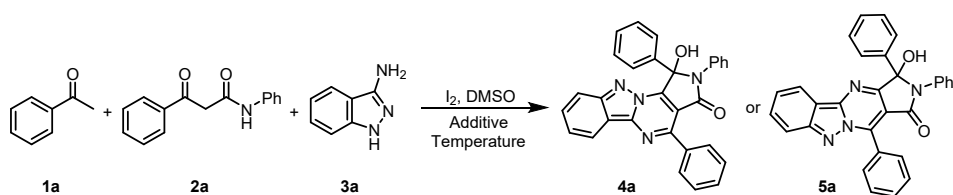

| Entry     | Additives (eq.)                                       | Temp (°C)  | Yield (%) <sup>b</sup> |           |
|-----------|-------------------------------------------------------|------------|------------------------|-----------|
|           |                                                       |            | 4a                     | 5a        |
| <b>1</b>  | -                                                     | <b>100</b> | <b>74</b>              | <b>13</b> |
| 2         | ZnCl <sub>2</sub> (1.0)                               | 100        | 65                     | 15        |
| 3         | Cu(OTf) <sub>2</sub> (1.0)                            | 100        | 46                     | 33        |
| 4         | AcOH (1.0)                                            | 100        | 67                     | 20        |
| 5         | TsOH (1.0)                                            | 100        | 60                     | 17        |
| 6         | Na <sub>2</sub> CO <sub>3</sub> (1.0)                 | 100        | 45                     | trace     |
| 7         | DBU (1.0)                                             | 100        | 63                     | 16        |
| 8         | TBHP (70 %) (1.0)                                     | 100        | 54                     | 10        |
| 9         | DTBP (1.0)                                            | 100        | 64                     | 15        |
| 10        | Na <sub>2</sub> S <sub>2</sub> O <sub>8</sub> (1.0)   | 100        | trace                  | 58        |
| 11        | PhI(OAc) <sub>2</sub> (1.0)                           | 100        | 70                     | 15        |
| 12        | MnO <sub>2</sub> (1.0)                                | 110        | nd                     | nd        |
| 13        | Na <sub>2</sub> S <sub>2</sub> O <sub>8</sub> (0.5)   | 100        | 10                     | 50        |
| 14        | Na <sub>2</sub> S <sub>2</sub> O <sub>8</sub> (1.5)   | 100        | trace                  | 63        |
| <b>15</b> | <b>Na<sub>2</sub>S<sub>2</sub>O<sub>8</sub> (2.0)</b> | <b>100</b> | <b>trace</b>           | <b>67</b> |
| 16        | Na <sub>2</sub> S <sub>2</sub> O <sub>8</sub> (2.5)   | 100        | trace                  | 62        |
| 17        | -                                                     | 80         | 55                     | 10        |
| 18        | -                                                     | 120        | 66                     | 14        |
| 19        | -                                                     | 140        | 61                     | 11        |
| 20        | Na <sub>2</sub> S <sub>2</sub> O <sub>8</sub> (2.0)   | 80         | trace                  | 43        |
| 21        | Na <sub>2</sub> S <sub>2</sub> O <sub>8</sub> (2.0)   | 120        | 11                     | 62        |
| 22        | Na <sub>2</sub> S <sub>2</sub> O <sub>8</sub> (2.0)   | 140        | 13                     | 56        |

<sup>a</sup>Reaction conditions: **1a** (1.0 mmol), **2a** (1.0 mmol), **3a** (1.0 mmol),  $I_2$  (1.0 mmol), additive (x equiv.), 4 h, DMSO (4.0 mL), indicated temperature, unless otherwise noted. <sup>b</sup>Isolated yields.

### 3. Synthesis steps and methods of operation

Some attempts (presumed structure)

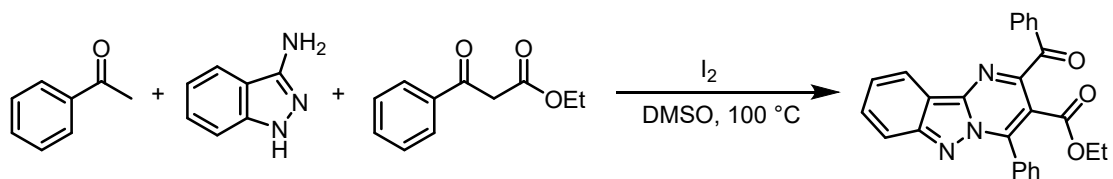

HRMS (ESI):  $m/z$   $[M+H]^+$  calcd for  $C_{26}H_{20}N_3O_3^+$ : 422.1499; found: 422.1491.

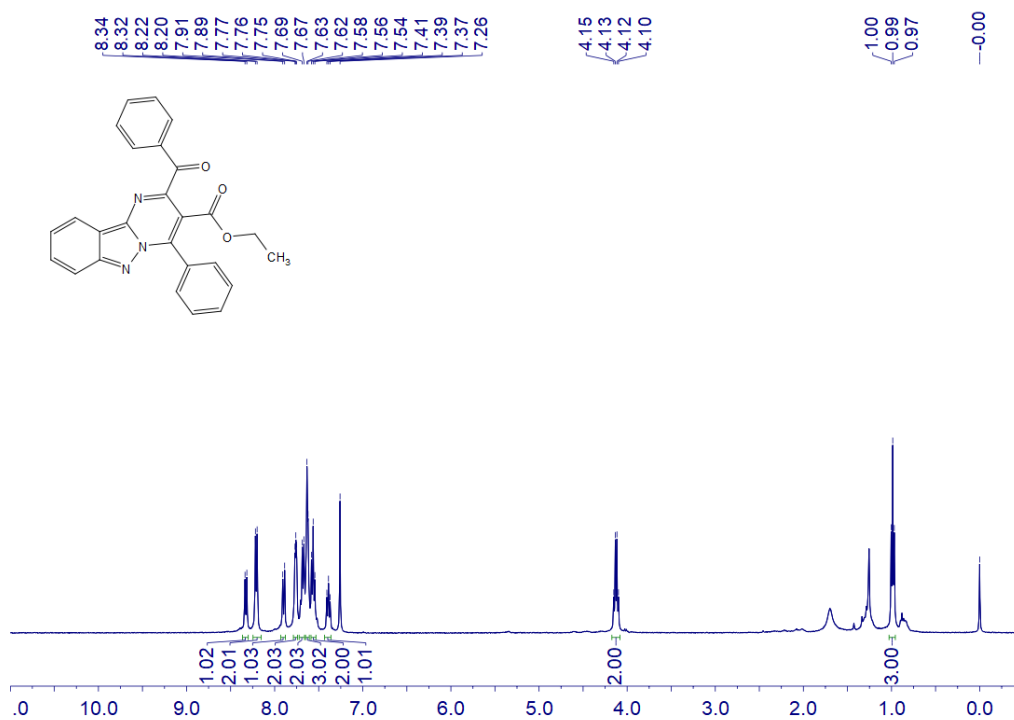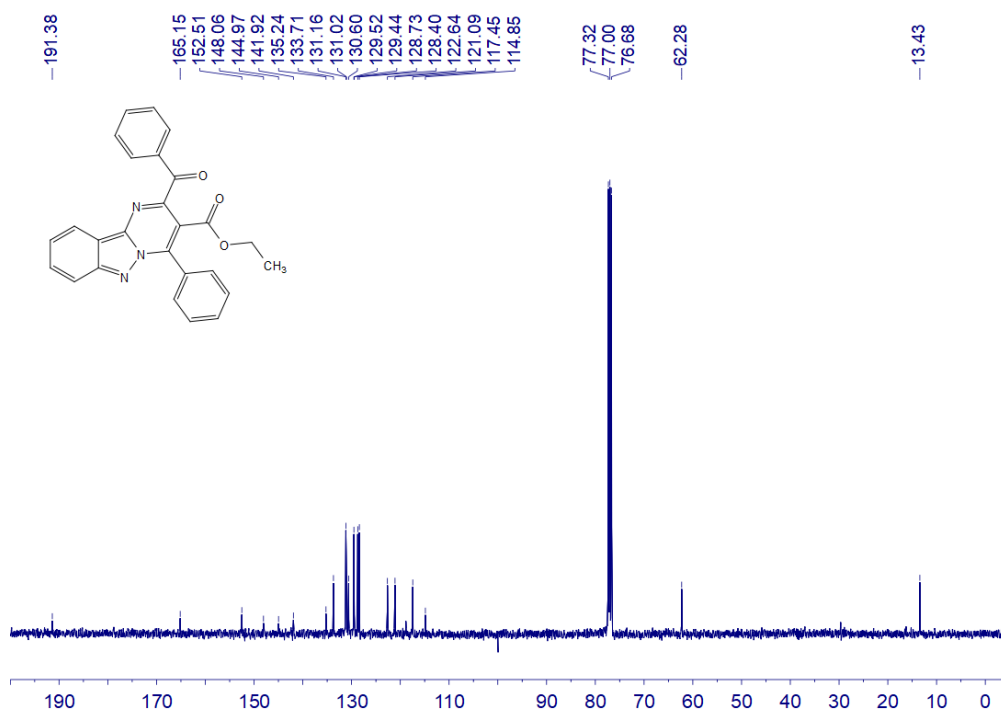



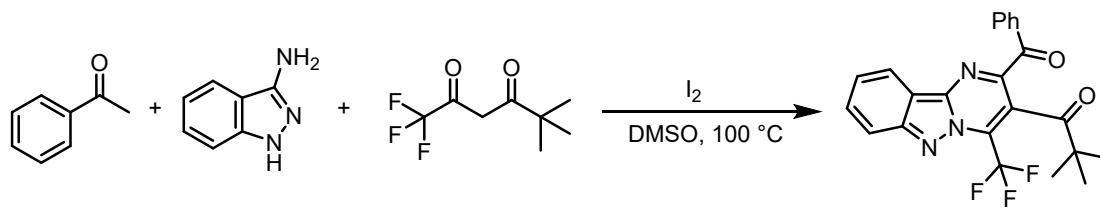

HRMS (ESI):  $m/z$   $[M+H]^+$  calcd for  $C_{23}H_{19}F_3N_3O_2^+$ : 426.1424; found: 426.1418.

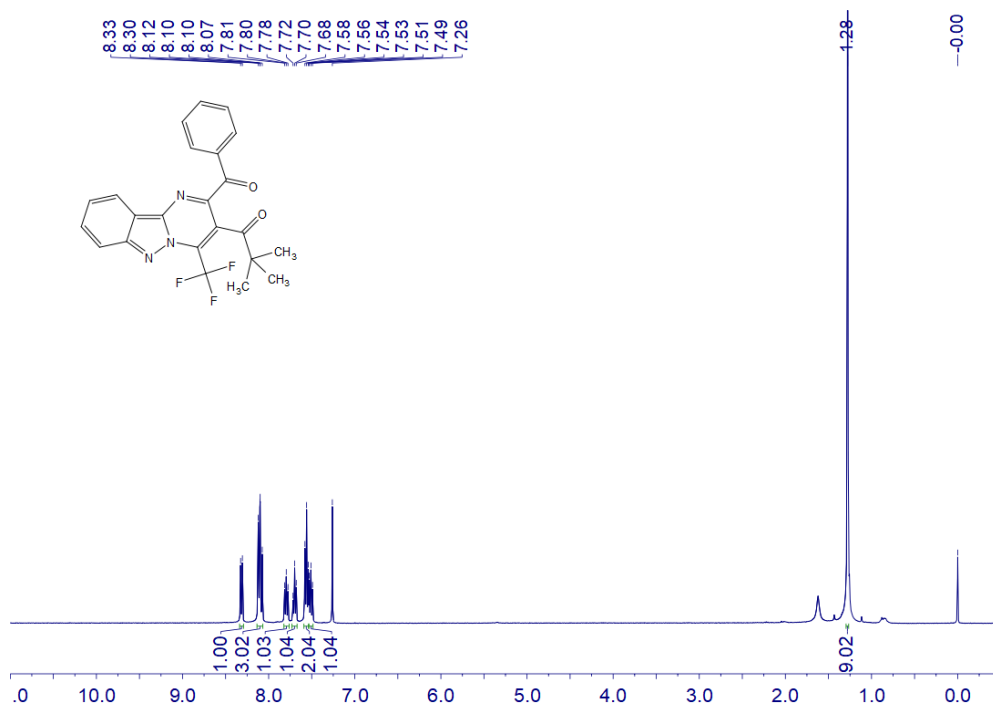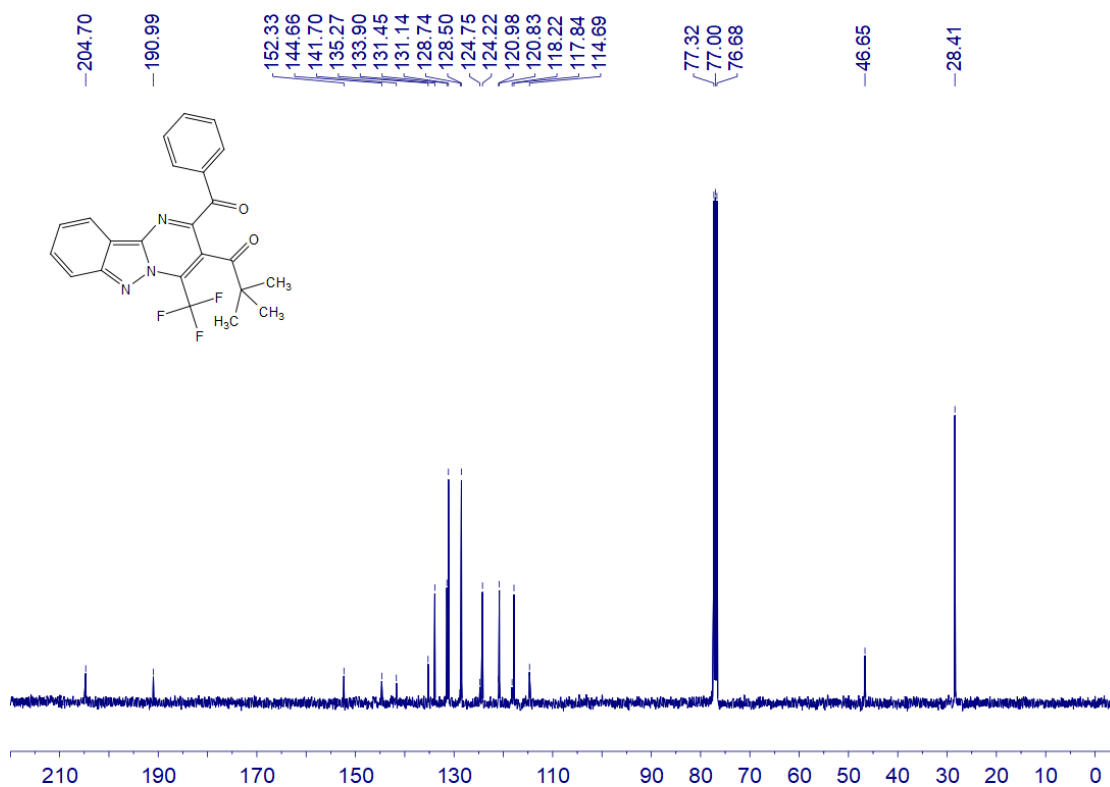

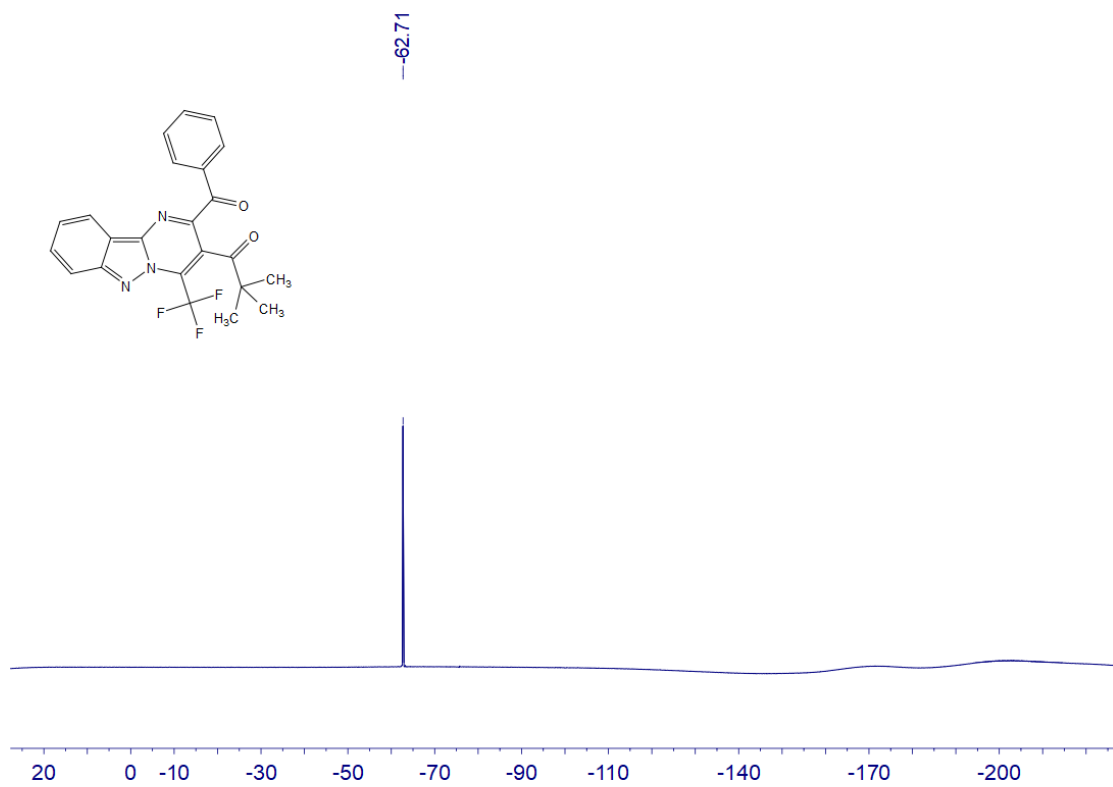

## Synthetic methods of benzoylacetanilides

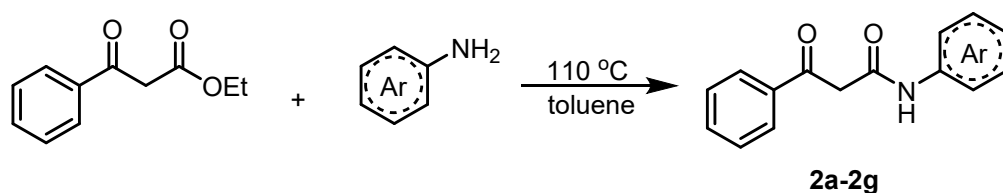

Ethyl benzoylacetate (1 mmol) and aryl amine (1.1 mmol) were heated in toluene solvent (2 ml, 18.8 mmol) and reacted under reflux conditions for 12 hours. After the completion of the reaction, the solvent was removed under reduced pressure to obtain a crude residue. The crude product was purified by column chromatography on silica gel (200–300 mesh) to afford the product **2b-2g** in 90% yields.<sup>1</sup>

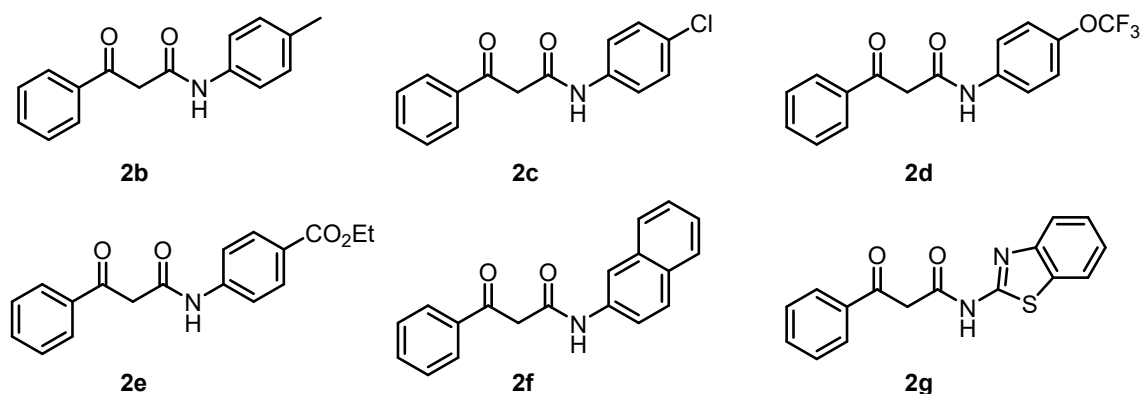

## General procedure for the synthesis of 4 and 5 (4a or 5a as example)

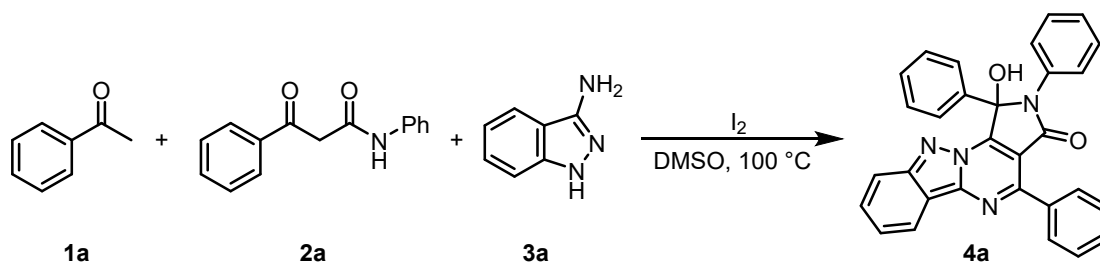

**1.0 mmol scale:** The reactions did not require the protection of inert gases. In a 35 mL sealed tube were added acetophenone (**1a**) (120 mg, 1.0 mmol), iodine (254 mg, 1.0 mmol) and dimethyl sulfoxide (4 mL) and the resulting mixture was stirred at  $100\text{ }^\circ\text{C}$  (heating block), the reaction tube was removed after about 1 hour. Then additional **2a** (240 mg, 1.0 mmol), **3a** (133 mg, 1.0 mmol) were added at room temperature, followed by reaction at  $100\text{ }^\circ\text{C}$  for 4 hours until substrate conversion was almost complete by TLC analysis. The reaction mixture was quenched with saturated  $\text{Na}_2\text{S}_2\text{O}_3$  solution (50 mL) and NaCl solution (150 mL), then the mixture was extracted with EtOAc (150 mL x 2), the organic layers were separated and combined,

dried over anhydrous  $\text{Na}_2\text{SO}_4$  and concentrated under reduced pressure. The crude product was purified by column chromatography on silica gel (eluent: petroleum ether/EtOAc = 8:1) to afford the product **4a** (346 mg, 74% yield).

**5.0 mmol scale:** The reactions did not require the protection of inert gases. In a 100 mL round flask were added acetophenone (**1a**) (600 mg, 5.0 mmol), iodine (1270 mg, 5.0 mmol) and dimethyl sulfoxide (30 mL) and the resulting mixture was stirred in oil bath heating at 100 °C, the round flask was removed after about 1.5 hours. Then additional **2a** (1200 mg, 5.0 mmol), **3a** (665 mg, 5.0 mmol) were added at room temperature, followed by reaction at 100 °C for 6 hours until substrate conversion was almost complete by TLC analysis. The reaction mixture was quenched with saturated  $\text{Na}_2\text{S}_2\text{O}_3$  solution (150 mL) and NaCl solution (300 mL), then the mixture was extracted with EtOAc (300 mL x 2), the organic layers were separated and combined, dried over anhydrous  $\text{Na}_2\text{SO}_4$  and concentrated under reduced pressure. The crude product was purified by column chromatography on silica gel (eluent: petroleum ether/EtOAc = 7:1) to afford the product **4a** (1470 mg, 63% yield).

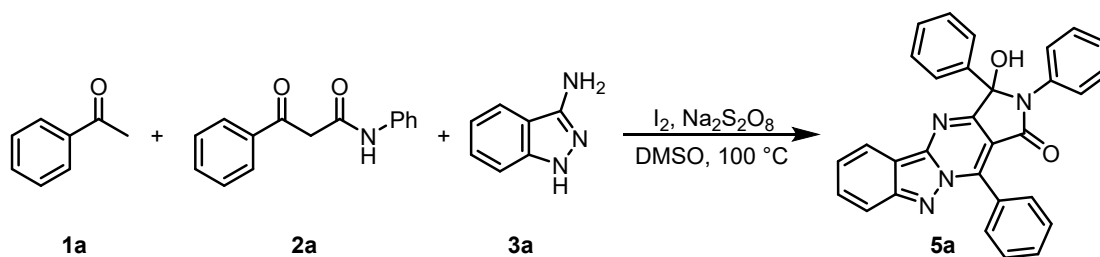

**1.0 mmol scale:** The reactions did not require the protection of inert gases. In a 35 mL sealed tube were added acetophenone (**1a**) (120 mg, 1.0 mmol), iodine (254 mg, 1.0 mmol) and dimethyl sulfoxide (4 mL) and the resulting mixture was stirred at 100 °C (heating block), the reaction tube was removed after about 1 hour. Then additional **2a** (240 mg, 1.0 mmol), **3a** (133 mg, 1.0 mmol),  $\text{Na}_2\text{S}_2\text{O}_8$  (476 mg, 2.0 mmol) were added at room temperature, followed by reaction at 100 °C for 4 hours until substrate conversion was almost complete by TLC analysis. The reaction mixture was quenched with saturated  $\text{Na}_2\text{S}_2\text{O}_3$  solution (50 mL) and NaCl solution (150 mL), then the mixture was extracted with EtOAc (150 mL x 2), the organic layers were separated and combined, dried over anhydrous  $\text{Na}_2\text{SO}_4$  and concentrated under reduced pressure. The crude product was purified by column chromatography on silica gel (eluent: petroleum ether/EtOAc = 5:1) to afford the product **5a** (313 mg, 67% yield).

**5.0 mmol scale:** The reactions did not require the protection of inert gases. In a 100 mL round flask were added acetophenone (**1a**) (600 mg, 5.0 mmol), iodine (1270 mg, 5.0 mmol) and dimethyl sulfoxide (30 mL) and the resulting mixture was stirred in oil bath heating at 100 °C, the round flask was removed after about 1.5 hours. Then additional **2a** (1200 mg, 5.0 mmol), **3a** (665 mg, 5.0 mmol),  $\text{Na}_2\text{S}_2\text{O}_8$  (2380 mg, 10.0 mmol) were added at room temperature, followed by reaction at 100 °C for 6 hours

until substrate conversion was almost complete by TLC analysis. The reaction mixture was quenched with saturated  $\text{Na}_2\text{S}_2\text{O}_3$  solution (150 mL) and NaCl solution (300 mL), then the mixture was extracted with EtOAc (300 mL x 2), the organic layers were separated and combined, dried over anhydrous  $\text{Na}_2\text{SO}_4$  and concentrated under reduced pressure. The crude product was purified by column chromatography on silica gel (eluent: petroleum ether/EtOAc = 5:1) to afford the product **5a** (1380 mg, 59% yield).

### Coupling of products and transformation of drug molecules

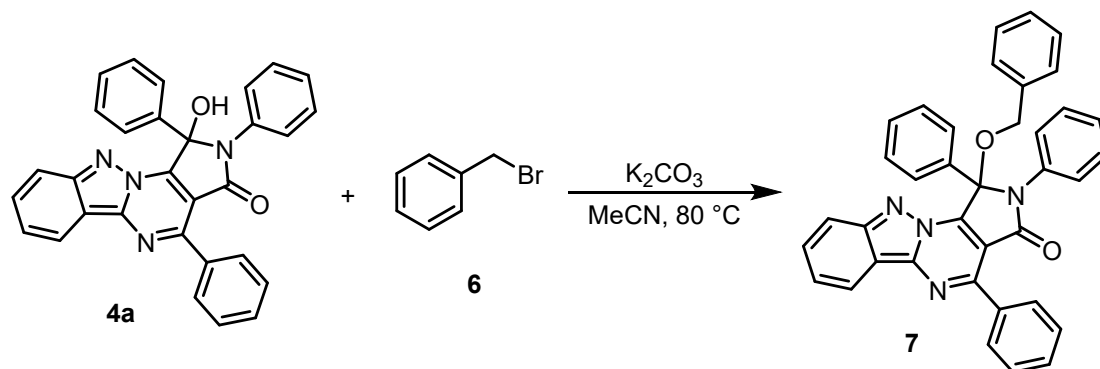

**4a** (140.0 mg, 0.3 mmol), benzyl bromide **6** (77 mg, 0.45 mmol) and  $\text{K}_2\text{CO}_3$  (83.0 mg, 0.6 mmol) were dissolved in MeCN (4 mL) and heated at  $80^\circ\text{C}$  for 7 hours. After substrate conversion was almost complete by TLC analysis, EtOAc and NaCl solution were added to the reaction mixture and extracted twice. The combined organic layers were dried with anhydrous  $\text{Na}_2\text{SO}_4$  and then concentrated under reduced pressure. The crude product was purified by column chromatography on silica gel (eluent: petroleum ether/EtOAc = 20:1) to afford the product **7** (155 mg, 93% yield).<sup>2</sup>

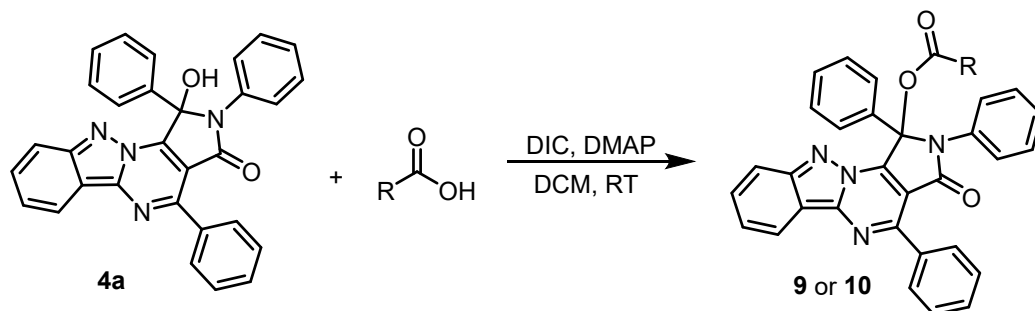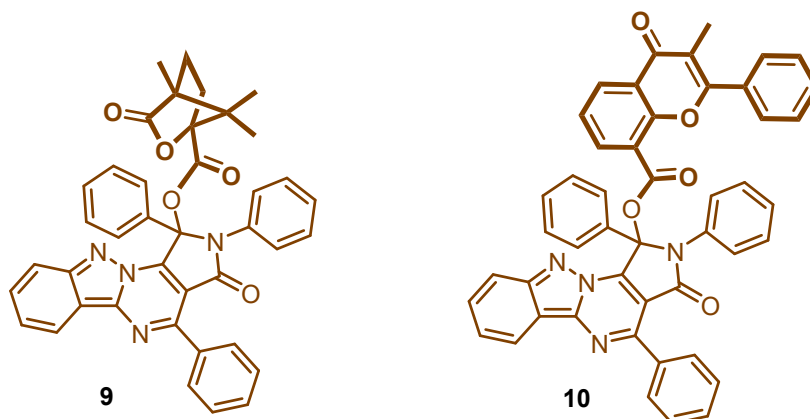

**4a** (0.3 mmol, 141 mg), (1*S*)-(-)-Camphanic acid (0.3 mmol, 59 mg), [or flavoxate acid (0.3 mmol, 84 mg)] and 4-dimethylaminopyridine (DMAP, 0.1 mmol, 12.2 mg) were added to a 35 mL sealed tube, then 3 mL of dichloromethane was added and mixed well to form a solution, and add the condensation reagent *N,N*-diisopropylcarbodiimide (DIC, 0.45 mmol, 57 mg) while stirring the solution. Keep the mixture stirred at room temperature for 4 hours using a magnetic stirrer to complete the reaction. After the reaction, the crude product was obtained by extracting with ethyl acetate and NaCl aqueous solution and concentrating under reduced pressure. Finally, the pure target product was obtained by column chromatography separation.<sup>3</sup>

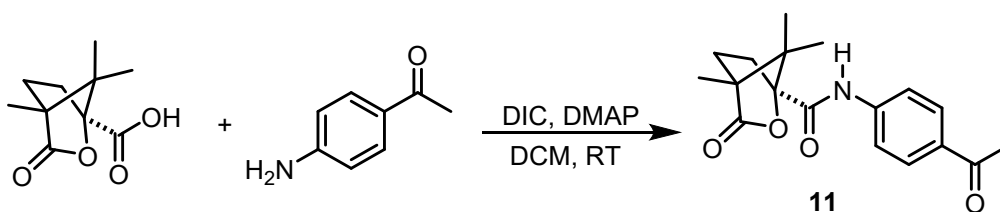

(1*S*)-(-)-Camphanic acid (10 mmol, 1980 mg), 1-(4-aminophenyl)ethan-1-one (10 mmol, 1350 mg) and 4-dimethylaminopyridine (DMAP, 3 mmol, 366 mg) were added to a 100 mL round-bottomed flask, then 50 mL of dichloromethane was added and mixed well to form a solution, and add the condensation reagent *N,N*-diisopropylcarbodiimide (DIC, 15 mmol, 1890 mg) while stirring the solution. Keep the mixture stirred at room temperature for 6 hours using a magnetic stirrer to complete the reaction. At the end of the reaction, the organic phase was extracted and

partitioned with ethyl acetate and NaCl aqueous solution, and the crude product mixture was obtained after rotary evaporation under reduced pressure. The crude product was purified by column chromatography on silica gel (200–300 mesh) to afford the product (more than 90% yield).<sup>3</sup>

1. S. Pal, R. Nandi, A. S. Manna, S. Aich and D. K. Maiti, *J. Org. Chem.* **2024**, *89*, 2703-2717.
2. Cao, L.; Hu, F.; Sun, H.; Zhang, X.; Li, S. S. *Org. Chem. Front.* **2022**, *9*, 1668-1674.
3. (a) Seeberger, Peter H. ; Pereira, Claney L.; Khan, Naeem; Xiao, Guozhi; Diago-Navarro, Elizabeth. *Angew. Chem. Int. Ed.*, **2017**, *56*, 13973-13978. (b) Rochon, Kristina; Proteau-Gagne, Arnaud; Bourassa, Philippe; Nadon, Jean-Francois; Cote, Jerome. *ACS Chemical Neuroscience*, **2013**, *4*, 1204-1216.

#### 4. Testing of AIE properties of molecules

The 2.3 mg of product **4q** was added to a 10 mL volumetric flask and THF was added to the scale to completely form a homogeneous solution to obtain a mother liquor with a concentration of 0.5 mmol/L. Prepare thirteen 10 mL centrifuge tubes, accurately add water (H<sub>2</sub>O) and acetonitrile (MeCN) to form a mixed solvent system with equal total volume and increasing water fractions ( $f_w$ ), then add 0.1 mL of the mother liquor and mix well to form AIE solutions (5.0 mL) of equal concentration and different water fractions of 0.01 mmol/L. Use a fluorometer to excite the solution to be tested under the UV light of 360 nm, the data, after processing and intensity normalization, to obtain the fluorescence emission curves as shown in the figure below.

| $f_w$ (%)             | 0   | 10  | 20  | 30  | 40  | 50  | 60  | 70  | 80  | 90  | 93   | 95   |
|-----------------------|-----|-----|-----|-----|-----|-----|-----|-----|-----|-----|------|------|
| mother liquor (mL)    | 0.1 | 0.1 | 0.1 | 0.1 | 0.1 | 0.1 | 0.1 | 0.1 | 0.1 | 0.1 | 0.1  | 0.1  |
| MeCN (mL)             | 4.9 | 4.4 | 3.9 | 3.4 | 2.9 | 2.4 | 1.9 | 1.4 | 0.9 | 0.4 | 0.25 | 0.15 |
| H <sub>2</sub> O (mL) | 0   | 0.5 | 1.0 | 1.5 | 2.0 | 2.5 | 3.0 | 3.5 | 4.0 | 4.5 | 4.65 | 4.75 |

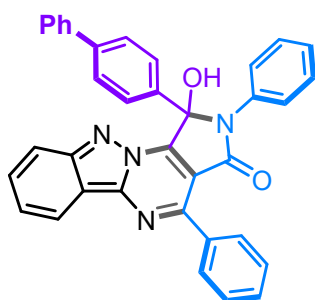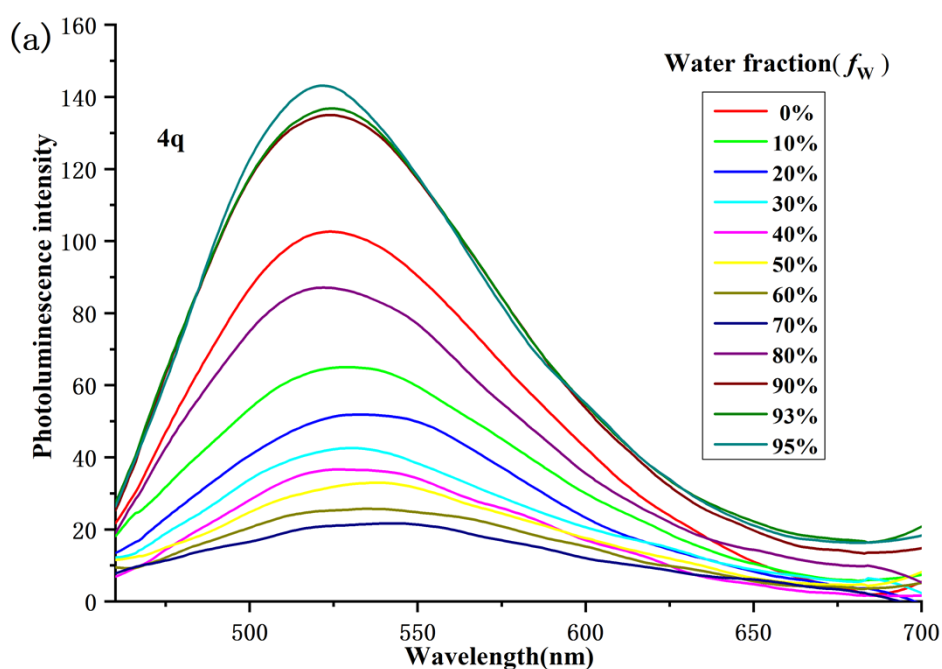

Fluorescence emission curve of AIE



In the fluorescence data and graphs of AIE, the maximum fluorescence intensity at each water fraction was obtained, which was plotted against the number of water fractions to obtain a graph of the trend of AIE intensity.

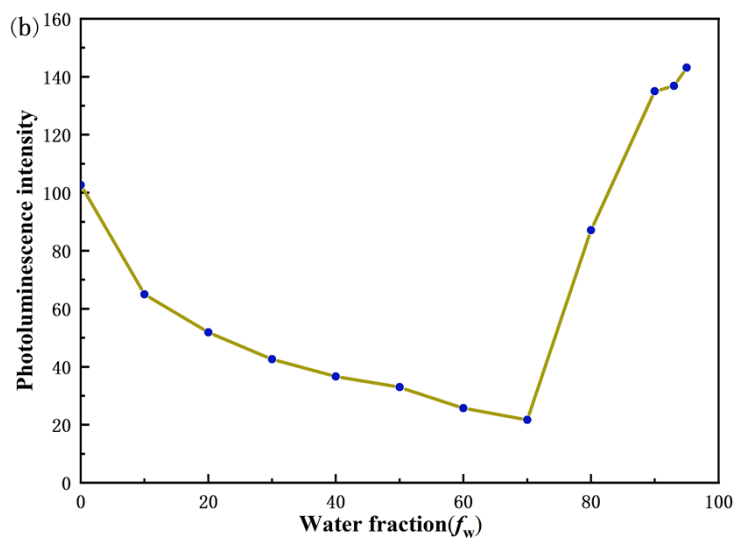

**Water fraction and maximum luminous intensity**

## 5. Mechanistic studies

### The mechanism of HRMS (4a as an example)

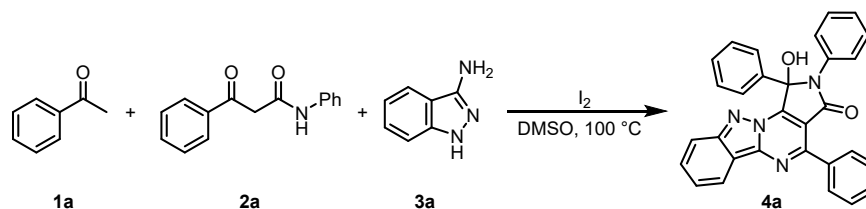

The reactions did not require the protection of inert gases. In a 35 mL sealed tube were added acetophenone (**1a**) (120.0 mg, 1.0 mmol), iodine (254.0 mg, 1.0 mmol) and dimethyl sulfoxide (4 mL) and the resulting mixture was stirred at 100 °C (heating block), the reaction tube was removed after about 1 hour. Then additional **2a** (239 mg, 1.0 mmol), **3a** (133 mg, 1.0 mmol) were added at room temperature, followed by reaction at 100 °C for 0.5 hours, then wait for the reaction to cool to room temperature. Take 0.5 mL of reaction solution and dilute it with 4 mL of CH<sub>2</sub>Cl<sub>2</sub>. Then 1.5 mL of the extraction solution was added into the test bottle, the samples were immediately monitored by Agilent LC1290-TOF 6224 high resolution mass spectrometers.

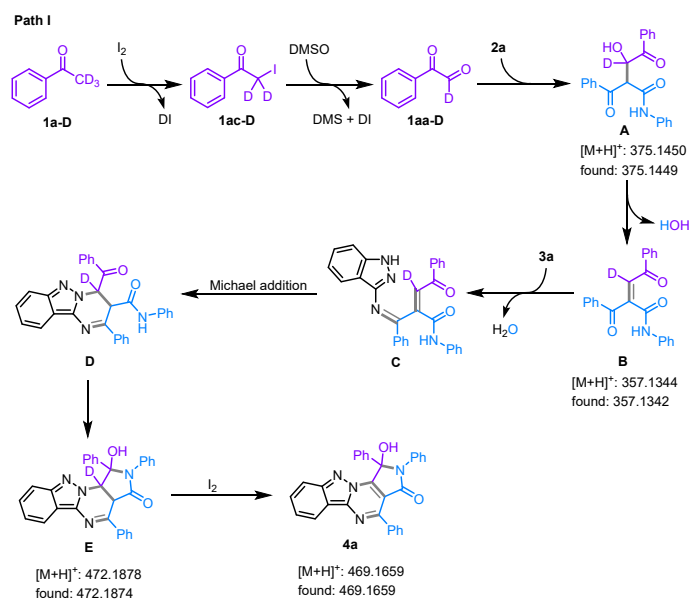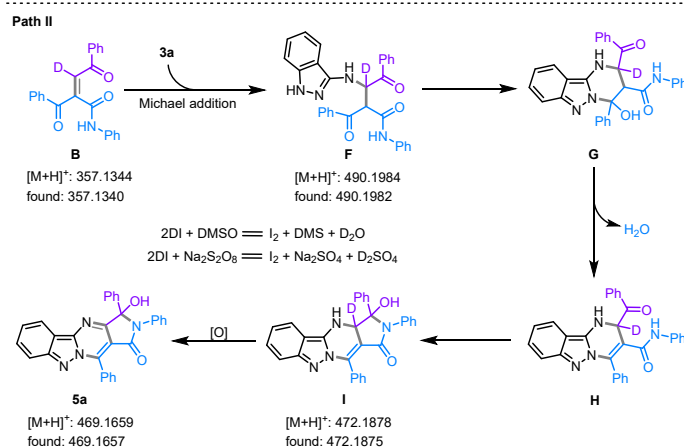

# Spectrum of HRMS:

## A

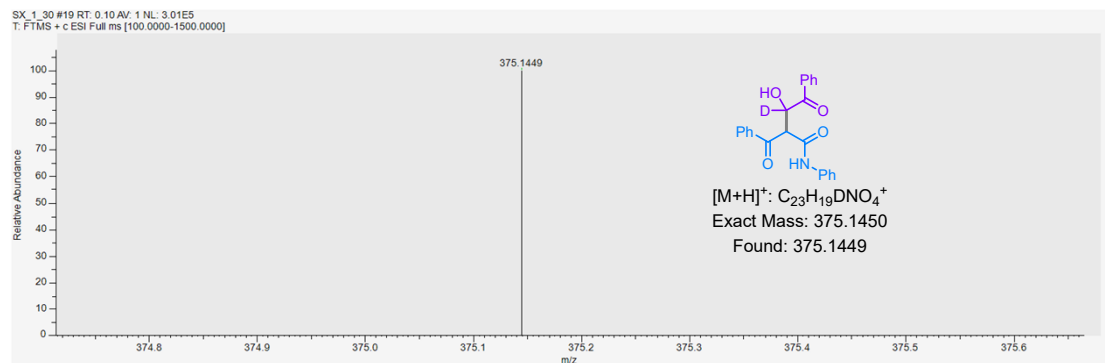

## B

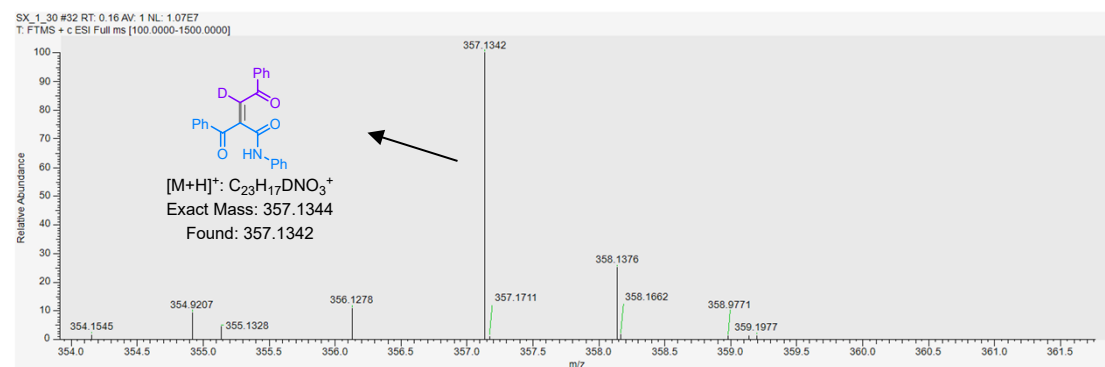

## E

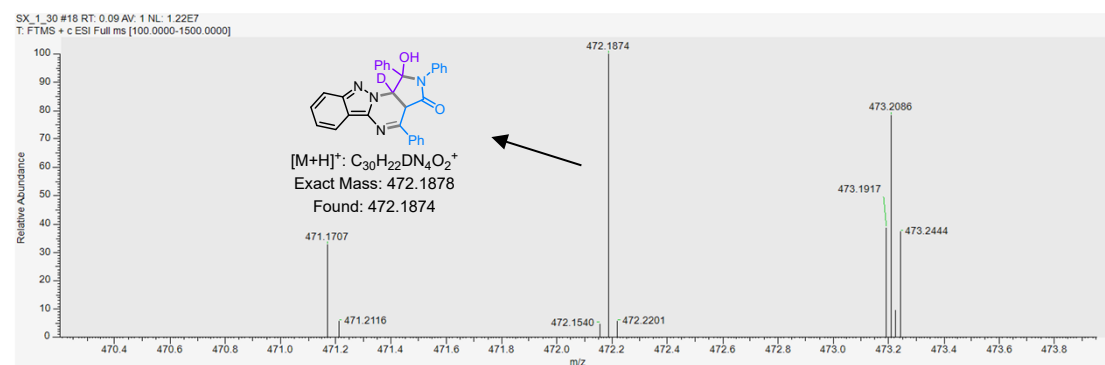

## 4a

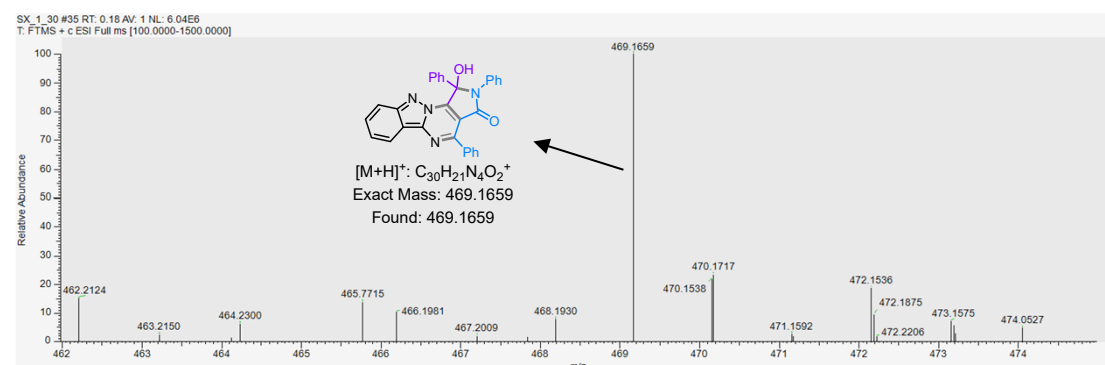

**A**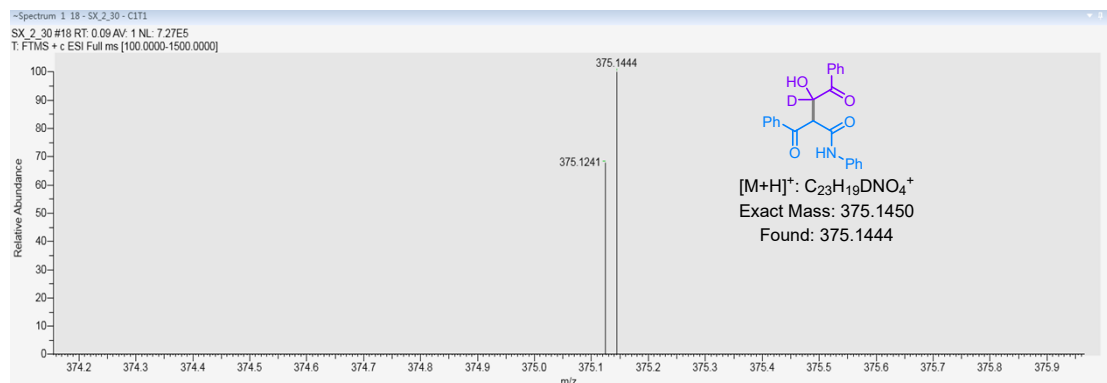**B**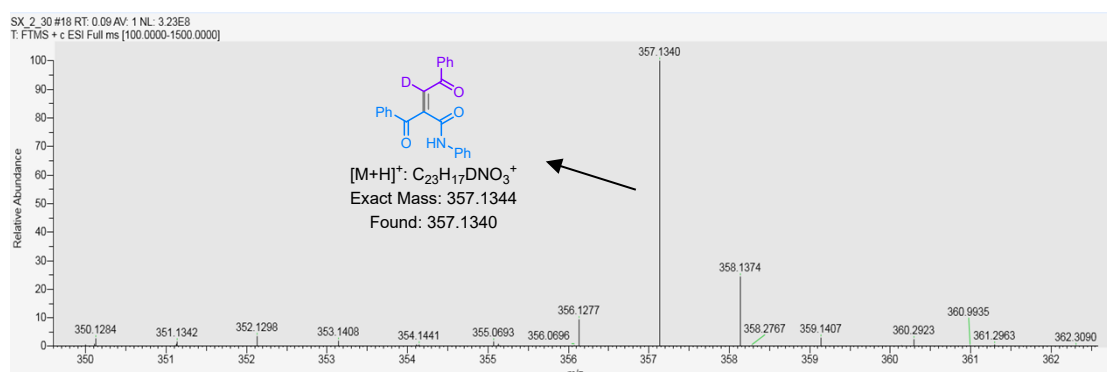**F**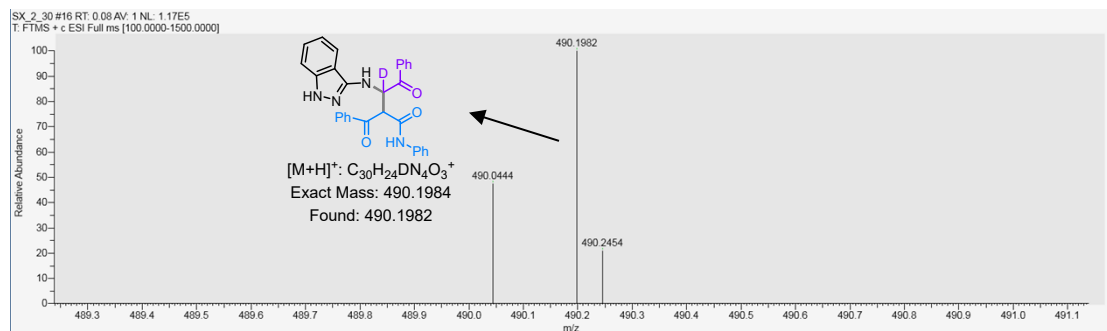**I**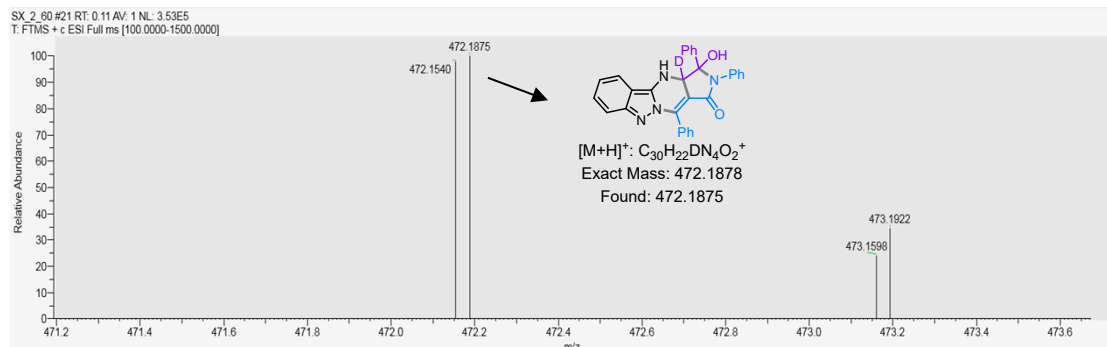

## 5a

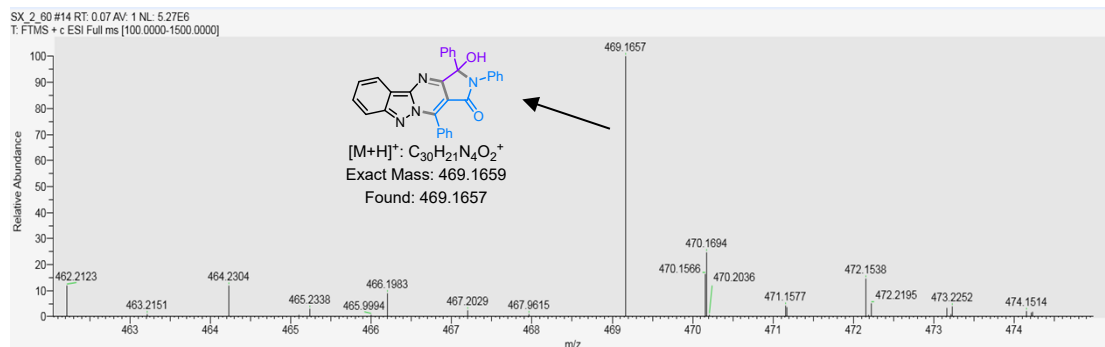

## Hammett-Analysis

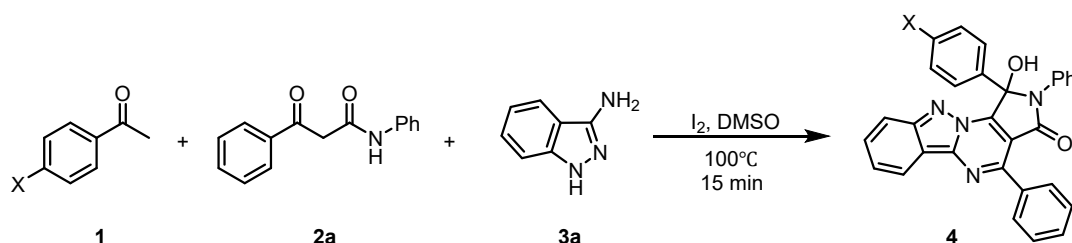

X = OMe, Me, H, F, Br, NO<sub>2</sub>

The reactions did not require the protection of inert gases. In a 35 mL sealed tube were added acetophenone (**1**) (1.0 mmol), iodine (254 mg, 1.0 mmol) and dimethyl sulfoxide (4 mL) and the resulting mixture was stirred at 100 °C (heating block), the reaction tube was removed after about 1 hour. Then additional **2a** (240 mg, 1.0 mmol), **3a** (133 mg, 1.0 mmol) were added at room temperature, followed by reaction at 100 °C for 15 min. The reaction mixture was quenched with saturated Na<sub>2</sub>S<sub>2</sub>O<sub>3</sub> solution (50 mL) and NaCl solution (150 mL), then the mixture was extracted with EtOAc (150 mL x 2), the organic layers were separated and combined, dried over anhydrous Na<sub>2</sub>SO<sub>4</sub> and concentrated under reduced pressure. The crude product was obtained. According to the literature<sup>[4]</sup>, we understand that the Hammett equation ( $\log(K_X/K_H) = \rho\sigma_x$ ,  $K_H$  is the reference reaction rate of the unsubstituted reactant, and  $K_X$  that of a substituted reactant)

| Substituent X   | $\sigma_x^+$ | $K_{X1}/K_{H1}$ | $K_{X2}/K_{H2}$ | $K_X/K_H$ | $\log(K_X/K_H)$ |
|-----------------|--------------|-----------------|-----------------|-----------|-----------------|
| OMe             | -0.268       | 1.198           | 1.052           | 1.125     | 0.051           |
| Me              | -0.170       | 0.993           | 1.157           | 1.075     | 0.031           |
| H               | 0.000        | 1.000           | 1.000           | 1.000     | 0.000           |
| F               | 0.062        | 0.867           | 0.933           | 0.900     | -0.045          |
| Br              | 0.232        | 0.824           | 0.876           | 0.850     | -0.071          |
| NO <sub>2</sub> | 0.780        | 0.472           | 0.528           | 0.500     | -0.301          |

The values of  $\log(K_X/K_H)$  were plotted versus the  $\sigma_x^+$  value and a linear fit was created to obtain the Hammett-slope  $\rho = -0.3396$ . The results indicate that the electron donating group benefits the reaction.

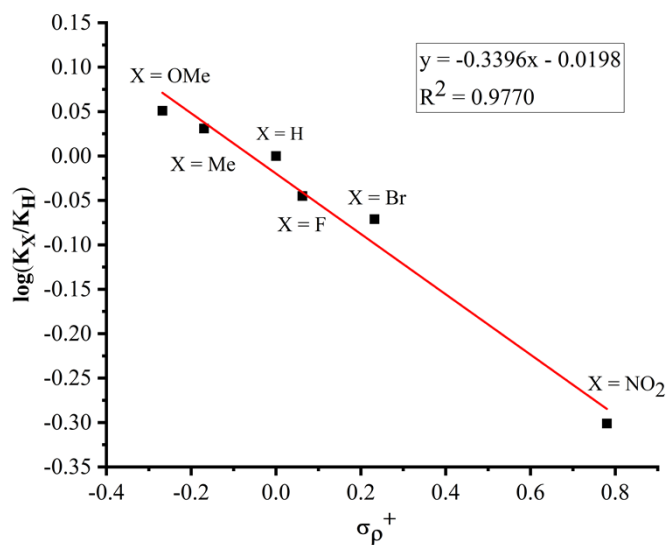

[4] (a) S. Chen, Y. Zhang, S. Liu and X. Shen, *Sci. China Chem.*, 2023, **66**, 3141-3147;

(b) D. Tian, G. Chen, X. Wang and H. J. Zhang, *J. Am. Chem. Soc.*, 2024, **146**, 18011-18018.

## 6. Characterization data for compounds

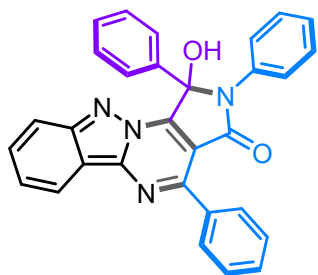

### (*S*)-1-hydroxy-1,2,4-triphenyl-1,2-dihydro-3*H*-pyrrolo[3',4':5,6]pyrimido[1,2-*b*]indazol-3-one (4a):

Yield 74%; 346 mg; yellow solid; column chromatography, silica gel (PE:EA, 8:1); mp 185–187 °C. <sup>1</sup>H NMR (400 MHz, DMSO-*d*<sub>6</sub>) δ 8.24 (d, *J* = 8.4 Hz, 1H), 8.04 (dd, *J* = 8.4, 2.8 Hz, 3H), 7.82 (d, *J* = 8.8 Hz, 1H), 7.74-7.64 (m, 4H), 7.64-7.59 (m, 2H), 7.42 (d, *J* = 7.6 Hz, 2H), 7.36-7.26 (m, 6H), 7.18 (t, *J* = 7.2 Hz, 1H). <sup>13</sup>C NMR (100 MHz, DMSO-*d*<sub>6</sub>) δ 163.0, 153.0, 152.4, 150.8, 144.5, 135.6, 135.1, 131.0, 130.7, 130.1, 128.9, 128.5, 128.3, 127.8, 127.24, 127.17, 126.9, 122.0, 121.0, 116.9, 113.0, 111.9, 89.4. HRMS (ESI): *m/z* [M+H]<sup>+</sup> calcd for C<sub>30</sub>H<sub>21</sub>N<sub>4</sub>O<sub>2</sub><sup>+</sup>: 469.1659; found: 469.1656.

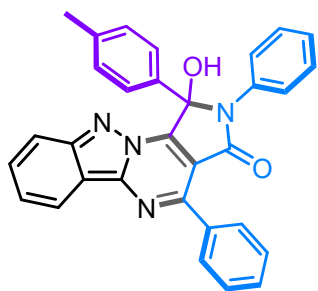

### (*S*)-1-hydroxy-2,4-diphenyl-1-(*p*-tolyl)-1,2-dihydro-3*H*-pyrrolo[3',4':5,6]pyrimido[1,2-*b*]indazol-3-one (4b):

Yield 75%; 361 mg; orange solid; column chromatography, silica gel (PE:EA, 8:1); mp 210–212 °C. <sup>1</sup>H NMR (400 MHz, DMSO-*d*<sub>6</sub>) δ 8.37 (d, *J* = 8.4 Hz, 1H), 8.28-8.15 (m, 3H), 7.85 (d, *J* = 8.8 Hz, 1H), 7.73-7.66 (m, 1H), 7.64-7.56 (m, 5H), 7.46-7.31 (m, 5H), 7.22 (t, *J* = 7.2 Hz, 1H), 7.12 (d, *J* = 8.0 Hz, 2H), 2.22 (s, 3H). <sup>13</sup>C NMR (100 MHz, DMSO-*d*<sub>6</sub>) δ 162.9, 152.9, 152.5, 150.8, 144.4, 138.2, 135.5, 135.1, 132.0, 131.0, 130.6, 130.1, 128.8, 128.5, 127.8, 127.1, 126.8, 122.0, 121.0, 116.9, 112.9, 111.8, 89.4, 20.7. HRMS (ESI): *m/z* [M+H]<sup>+</sup> calcd for C<sub>31</sub>H<sub>23</sub>N<sub>4</sub>O<sub>2</sub><sup>+</sup>: 483.1816; found: 483.1815.

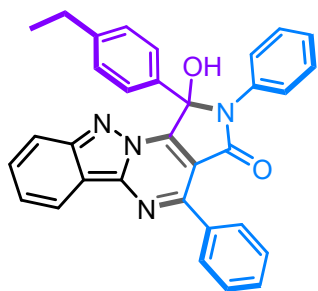

**(S)-1-(4-ethylphenyl)-1-hydroxy-2,4-diphenyl-1,2-dihydro-3H-pyrrolo[3',4':5,6]pyrimido[1,2-b]indazol-3-one (4c):**

Yield 71%; 352 mg; yellow solid; column chromatography, silica gel (PE:EA, 8:1); mp 220–222 °C. <sup>1</sup>H NMR (400 MHz, DMSO-*d*<sub>6</sub>) δ 8.37 (d, *J* = 8.4 Hz, 1H), 8.24 (dd, *J* = 8.0, 4.0 Hz, 3H), 7.86 (d, *J* = 8.8 Hz, 1H), 7.69 (d, *J* = 7.6 Hz, 1H), 7.66–7.59 (m, 5H), 7.46 (d, *J* = 7.6 Hz, 2H), 7.39–7.31 (m, 3H), 7.22 (t, *J* = 7.6 Hz, 1H), 7.16 (d, *J* = 8.4 Hz, 2H), 2.58–2.51 (m, 2H), 1.09 (t, *J* = 7.6 Hz, 3H). <sup>13</sup>C NMR (100 MHz, DMSO-*d*<sub>6</sub>) δ 163.0, 152.9, 152.5, 150.8, 144.4, 144.2, 135.5, 135.2, 132.2, 131.0, 130.6, 130.1, 128.5, 127.8, 127.6, 127.2, 127.1, 126.8, 122.0, 121.0, 116.9, 112.9, 111.7, 89.5, 27.7, 15.0. HRMS (ESI): *m/z* [M+H]<sup>+</sup> calcd for C<sub>32</sub>H<sub>25</sub>N<sub>4</sub>O<sub>2</sub><sup>+</sup>: 497.1972; found: 497.1974.

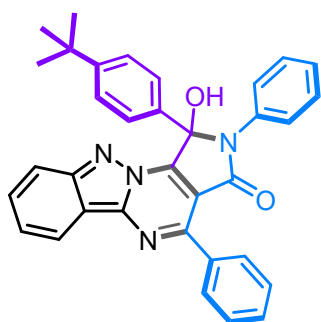

**(S)-1-(4-(tert-butyl)phenyl)-1-hydroxy-2,4-diphenyl-1,2-dihydro-3H-pyrrolo[3',4':5,6]pyrimido[1,2-b]indazol-3-one (4d):**

Yield 75%; 393 mg; yellow solid; column chromatography, silica gel (PE:EA, 8:1); mp 228–230 °C. <sup>1</sup>H NMR (400 MHz, DMSO-*d*<sub>6</sub>) δ 8.35 (d, *J* = 8.4 Hz, 1H), 8.24–8.20 (m, 3H), 7.86 (d, *J* = 8.8 Hz, 1H), 7.67 (q, *J* = 2.4 Hz, 3H), 7.63–7.59 (m, 3H), 7.46 (d, *J* = 7.6 Hz, 2H), 7.38–7.31 (m, 5H), 7.22 (t, *J* = 7.6 Hz, 1H), 1.19 (s, 9H). <sup>13</sup>C NMR (100 MHz, DMSO-*d*<sub>6</sub>) δ 162.9, 152.9, 152.5, 151.1, 150.8, 144.4, 135.5, 135.1, 132.0, 131.0, 130.6, 130.1, 128.5, 127.8, 127.1, 126.8, 125.0, 121.9, 121.0, 116.9, 112.9, 111.6, 89.5, 34.3, 31.0. HRMS (ESI): *m/z* [M+H]<sup>+</sup> calcd for C<sub>34</sub>H<sub>29</sub>N<sub>4</sub>O<sub>2</sub><sup>+</sup>: 525.2285; found: 525.2281.

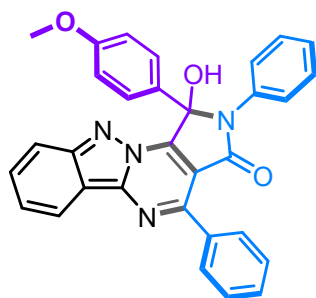

**(S)-1-hydroxy-1-(4-methoxyphenyl)-2,4-diphenyl-1,2-dihydro-3H-pyrrolo[3',4':5,6]pyrimido[1,2-b]indazol-3-one (4e):**

Yield 75%; 498 mg; yellow solid; column chromatography, silica gel (PE:EA, 7:1); mp 219–221 °C. <sup>1</sup>H NMR (400 MHz, DMSO-*d*<sub>6</sub>) δ 8.36 (d, *J* = 8.4 Hz, 1H), 8.21 (dd, *J* = 6.8, 2.8 Hz, 2H), 8.18 (s, 1H), 7.84 (d, *J* = 8.8 Hz, 1H), 7.71–7.67 (m, 1H), 7.64–7.59 (m, 5H), 7.44–7.37 (m, 3H), 7.33 (t, *J* = 8.0 Hz, 2H), 7.22 (t, *J* = 7.2 Hz, 1H), 6.85 (d, *J* = 8.8 Hz, 2H), 3.68 (s, 3H). <sup>13</sup>C NMR (100 MHz, DMSO-*d*<sub>6</sub>) δ 162.9, 159.4, 152.9, 152.5, 150.8, 144.4, 135.6,



135.2, 131.0, 130.6, 130.1, 128.7, 128.5, 127.8, 127.1, 126.8, 126.7, 122.0, 121.0, 116.9, 113.5, 112.9, 111.7, 89.3, 55.0. HRMS (ESI):  $m/z$   $[M+H]^+$  calcd for  $C_{31}H_{23}N_4O_3^+$ : 499.1765; found: 499.1763.

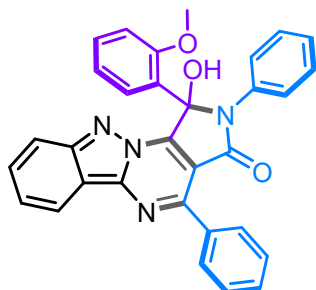

**(S)-1-hydroxy-1-(2-methoxyphenyl)-2,4-diphenyl-1,2-dihydro-3H-pyrrolo[3',4':5,6]pyrimido[1,2-b]indazol-3-one (4f):**

Yield 69%; 343 mg; orange solid; column chromatography, silica gel (PE:EA, 8:1); mp 259–261 °C.  $^1H$  NMR (400 MHz,  $DMSO-d_6$ )  $\delta$  8.40 (d,  $J = 8.4$  Hz, 1H), 8.23 (s, 1H), 8.21 (dd,  $J = 7.6, 2.0$  Hz, 2H), 8.03 (dd,  $J = 8.0, 1.6$  Hz, 1H), 7.82 (d,  $J = 8.8$  Hz, 1H), 7.68 (d,  $J = 7.6$  Hz, 1H), 7.66–7.61 (m, 3H), 7.40–7.29 (m, 5H), 7.28–7.17 (m, 2H), 7.03 (t,  $J = 7.6$  Hz, 1H), 6.79 (d,  $J = 8.4$  Hz, 1H), 3.34 (s, 3H).  $^{13}C$  NMR (100 MHz,  $DMSO-d_6$ )  $\delta$  163.4, 155.6, 153.4, 152.9, 150.7, 144.2, 135.7, 135.1, 130.9, 130.6, 130.3, 130.1, 128.4, 128.0, 127.1, 127.0, 122.7, 121.7, 121.0, 120.5, 116.8, 112.7, 112.5, 111.3, 87.0, 55.5. HRMS (ESI):  $m/z$   $[M+H]^+$  calcd for  $C_{31}H_{23}N_4O_3^+$ : 499.1765; found: 499.1762.

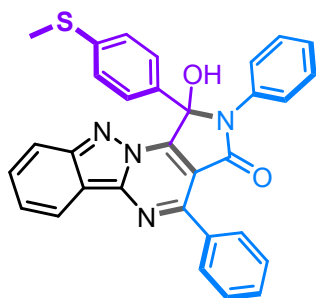

**(S)-1-hydroxy-1-(4-(methylthio)phenyl)-2,4-diphenyl-1,2-dihydro-3H-pyrrolo[3',4':5,6]pyrimido[1,2-b]indazol-3-one (4g):**

Yield 71%; 365 mg; yellow solid; column chromatography, silica gel (PE:EA, 5:1); mp 243–245 °C.  $^1H$  NMR (400 MHz,  $DMSO-d_6$ )  $\delta$  8.38 (d,  $J = 8.4$  Hz, 1H), 8.28 (s, 1H), 8.24 (dd,  $J = 6.4, 3.2$  Hz, 2H), 7.86 (d,  $J = 8.8$  Hz, 1H), 7.72–7.65 (m, 3H), 7.64–7.59 (m, 3H), 7.46 (d,  $J = 7.6$  Hz, 2H), 7.40–7.33 (m, 3H), 7.24 (t,  $J = 7.6$  Hz, 1H), 7.17 (d,  $J = 8.8$  Hz, 2H), 2.40 (s, 3H).  $^{13}C$  NMR (100 MHz,  $DMSO-d_6$ )  $\delta$  163.0, 152.9, 152.3, 150.8, 144.4, 139.2, 135.5, 135.1, 131.2, 131.0, 130.6, 130.1, 128.6, 127.8, 127.1, 126.9, 124.9, 122.0, 121.0, 116.9, 112.9, 111.8, 89.2, 13.9. HRMS (ESI):  $m/z$   $[M+H]^+$  calcd for  $C_{31}H_{23}N_4O_2S^+$ : 515.1536; found: 515.1533.

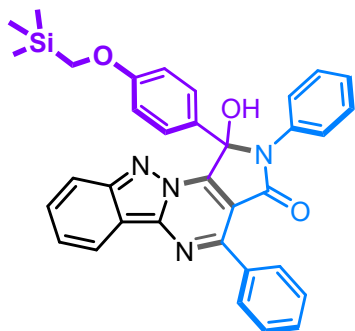

**(S)-1-hydroxy-2,4-diphenyl-1-(4-((trimethylsilyl)methoxy)phenyl)-1,2-dihydro-3H-pyrrolo[3',4':5,6]pyrimido[1,2-b]indazol-3-one (4h):**

Yield 67%; 382 mg; orange solid; column chromatography, silica gel (PE:EA, 7:1); mp 205–208 °C. <sup>1</sup>H NMR (400 MHz, DMSO-*d*<sub>6</sub>) δ 8.37 (d, *J* = 8.4 Hz, 1H), 8.23 (dd, *J* = 6.4, 2.8 Hz, 2H), 8.16 (s, 1H), 7.84 (d, *J* = 8.8 Hz, 1H), 7.71–7.66 (m, 1H), 7.64–7.57 (m, 5H), 7.44 (d, *J* = 8.0 Hz, 2H), 7.40–7.31 (m, 3H), 7.23 (d, *J* = 7.2 Hz, 1H), 6.89 (d, *J* = 8.8 Hz, 2H), 3.54 (q, *J* = 12.8 Hz, 2H), 0.06 (s, 9H). <sup>13</sup>C NMR (100 MHz, DMSO-*d*<sub>6</sub>) δ 162.9, 161.2, 152.9, 152.5, 150.8, 144.4, 135.5, 135.2, 130.9, 130.6, 130.1, 128.8, 128.5, 127.8, 127.1, 126.7, 126.3, 121.9, 121.0, 118.2, 116.8, 113.7, 112.9, 111.7, 89.3, 60.6, -3.15. HRMS (ESI): *m/z* [M+H]<sup>+</sup> calcd for C<sub>34</sub>H<sub>31</sub>N<sub>4</sub>O<sub>3</sub>Si<sup>+</sup>: 571.2160; found: 571.2160.

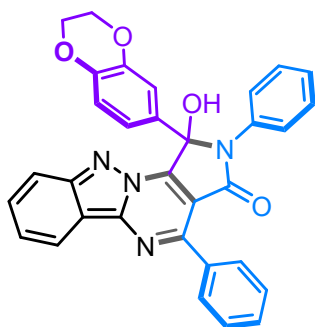

**(S)-1-(2,3-dihydrobenzo[*b*][1,4]dioxin-6-yl)-1-hydroxy-2,4-diphenyl-1,2-dihydro-3H-pyrrolo[3',4':5,6]pyrimido[1,2-*b*]indazol-3-one (4i):**

Yield 71%; 373 mg; yellow solid; column chromatography, silica gel (PE:EA, 6:1); mp 185–187 °C. <sup>1</sup>H NMR (400 MHz, DMSO-*d*<sub>6</sub>) δ 8.37 (d, *J* = 8.4 Hz, 1H), 8.22 (d, *J* = 3.6 Hz, 2H), 8.16 (s, 1H), 7.88 (d, *J* = 8.8 Hz, 1H), 7.72–7.67 (m, 1H), 7.62–7.57 (m, 3H), 7.44 (d, *J* = 8.0 Hz, 2H), 7.40–7.33 (m, 3H), 7.25 (d, *J* = 7.6 Hz, 2H), 7.16 (d, *J* = 8.4 Hz, 1H), 6.77 (d, *J* = 8.4 Hz, 1H), 4.17 (d, *J* = 3.6 Hz, 4H). <sup>13</sup>C NMR (100 MHz, DMSO-*d*<sub>6</sub>) δ 162.9, 152.9, 152.3, 150.8, 144.4, 143.7, 142.9, 135.5, 135.1, 131.0, 130.7, 130.1, 128.6, 127.8, 127.0, 126.8, 122.0, 121.0, 120.2, 116.9, 116.8, 116.3, 112.9, 111.7, 89.1, 64.0, 63.9. HRMS (ESI): *m/z* [M+H]<sup>+</sup> calcd for C<sub>32</sub>H<sub>23</sub>N<sub>4</sub>O<sub>4</sub><sup>+</sup>: 527.1714; found: 527.1713.

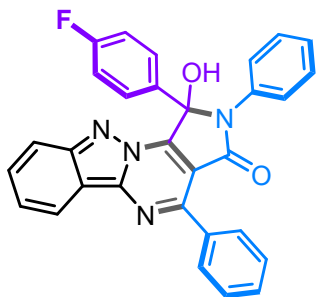

**(S)-1-(4-fluorophenyl)-1-hydroxy-2,4-diphenyl-1,2-dihydro-3H-pyrrolo[3',4':5,6]pyrimido[1,2-b]indazol-3-one (4j):**

Yield 73%; 354 mg; yellow solid; column chromatography, silica gel (PE:EA, 7:1); mp 188–190 °C. <sup>1</sup>H NMR (400 MHz, DMSO-*d*<sub>6</sub>) δ 8.38 (d, *J* = 8.4 Hz, 1H), 8.33 (s, 1H), 8.28-8.21 (m, 2H), 7.85 (d, *J* = 8.8 Hz, 1H), 7.78 (dd, *J* = 8.4, 5.6 Hz, 2H), 7.72-7.66 (m, 1H), 7.61 (d, *J* = 3.6 Hz, 3H), 7.42 (d, *J* = 8.0 Hz, 2H), 7.39-7.30 (m, 3H), 7.24 (t, *J* = 7.2 Hz, 1H), 7.14 (t, *J* = 8.8 Hz, 2H). <sup>13</sup>C NMR (100 MHz, DMSO-*d*<sub>6</sub>) δ 162.9, 162.2 (d, *J* = 244.0 Hz, <sup>1</sup>*J*<sub>CF</sub>), 152.9, 152.0, 150.8, 144.4, 135.5, 134.9, 131.28, 131.2 (d, *J* = 3.0 Hz, <sup>4</sup>*J*<sub>CF</sub>), 130.7, 130.6, 130.1, 129.6 (d, *J* = 7.0 Hz, <sup>3</sup>*J*<sub>CF</sub>), 128.6, 127.8, 127.3, 127.0, 122.0, 121.0, 116.8, 115.1 (d, *J* = 23.0 Hz, <sup>2</sup>*J*<sub>CF</sub>), 113.0, 111.9, 88.9. <sup>19</sup>F NMR (376 MHz, DMSO-*d*<sub>6</sub>) δ -113.03. HRMS (ESI): *m/z* [M+H]<sup>+</sup> calcd for C<sub>30</sub>H<sub>20</sub>FN<sub>4</sub>O<sub>2</sub><sup>+</sup>: 487.1565; found: 487.1566.

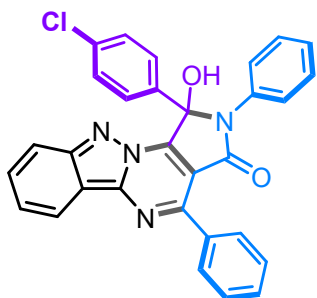

**(S)-1-(4-chlorophenyl)-1-hydroxy-2,4-diphenyl-1,2-dihydro-3H-pyrrolo[3',4':5,6]pyrimido[1,2-b]indazol-3-one (4k):**

Yield 75%; 376 mg; yellow solid; column chromatography, silica gel (PE:EA, 6:1); mp 200–202 °C. <sup>1</sup>H NMR (400 MHz, DMSO-*d*<sub>6</sub>) δ 8.37 (d, *J* = 8.4 Hz, 1H), 8.34 (s, 1H), 8.26-8.19 (m, 2H), 7.84 (d, *J* = 8.8 Hz, 1H), 7.76-7.66 (m, 3H), 7.64-7.58 (m, 3H), 7.42-7.33 (m, 7H), 7.24 (t, *J* = 7.2 Hz, 1H). <sup>13</sup>C NMR (100 MHz, DMSO-*d*<sub>6</sub>) δ 162.9, 152.9, 151.8, 150.8, 144.4, 135.4, 134.8, 134.2, 133.6, 131.0, 130.6, 130.1, 129.2, 128.6, 128.2, 127.8, 127.2, 127.0, 122.0, 121.0, 116.8, 112.9, 111.9, 88.8. HRMS (ESI): *m/z* [M+H]<sup>+</sup> calcd for C<sub>30</sub>H<sub>20</sub>ClN<sub>4</sub>O<sub>2</sub><sup>+</sup>: 503.1269; found: 503.1270.

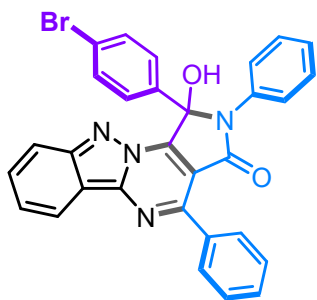

**(S)-1-(4-bromophenyl)-1-hydroxy-2,4-diphenyl-1,2-dihydro-3H-pyrrolo[3',4':5,6]pyrimido[1,2-b]indazol-3-one (4l):**

Yield 72%; 393 mg; yellow solid; column chromatography, silica gel (PE:EA, 6:1); mp 210–212 °C. <sup>1</sup>H NMR (400 MHz, DMSO-*d*<sub>6</sub>) δ 8.37 (d, *J* = 10.8 Hz, 2H), 8.24 (dd, *J* = 6.4, 2.8 Hz, 2H), 7.85 (d, *J* = 8.8 Hz, 1H), 7.74-7.65 (m, 3H), 7.65-7.57 (m, 3H), 7.51 (d, *J* = 8.4 Hz, 2H), 7.45-7.32 (m, 5H), 7.25 (t, *J* = 7.2 Hz, 1H). <sup>13</sup>C NMR (100 MHz, DMSO-*d*<sub>6</sub>) δ 162.9, 152.9, 151.8, 150.8, 144.4, 135.4, 134.8, 134.6, 131.2, 131.1, 130.6, 130.1, 129.6, 128.7, 127.8, 127.3, 127.0, 122.4, 122.0, 121.0, 116.8, 113.0, 112.0, 88.8. HRMS (ESI): *m/z* [M+H]<sup>+</sup> calcd for C<sub>30</sub>H<sub>20</sub>BrN<sub>4</sub>O<sub>2</sub><sup>+</sup>: 547.0764; found: 547.0766.

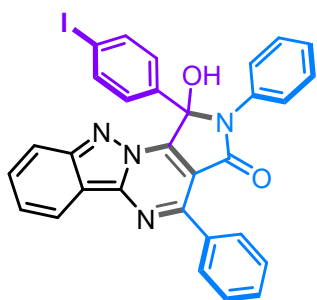

**(S)-1-hydroxy-1-(4-iodophenyl)-2,4-diphenyl-1,2-dihydro-3H-pyrrolo[3',4':5,6]pyrimido[1,2-b]indazol-3-one (4m):**

Yield 70%; 415 mg; yellow solid; column chromatography, silica gel (PE:EA, 8:1); mp 206–208 °C. <sup>1</sup>H NMR (400 MHz, DMSO-*d*<sub>6</sub>) δ 8.37 (d, *J* = 8.4 Hz, 1H), 8.33 (s, 1H), 8.22 (dd, *J* = 6.4, 2.8 Hz, 2H), 7.85 (d, *J* = 8.8 Hz, 1H), 7.71-7.66 (m, 3H), 7.63-7.59 (m, 3H), 7.52 (d, *J* = 8.4 Hz, 2H), 7.40 (t, *J* = 7.6 Hz, 3H), 7.37-7.33 (m, 2H), 7.24 (t, *J* = 7.2 Hz, 1H). <sup>13</sup>C NMR (100 MHz, DMSO-*d*<sub>6</sub>) δ 162.9, 152.9, 151.8, 150.8, 144.4, 137.0, 135.4, 135.0, 134.8, 131.1, 130.6, 130.1, 129.5, 128.7, 127.8, 127.2, 127.0, 122.0, 121.0, 116.8, 112.9, 111.9, 95.9, 89.0. HRMS (ESI): *m/z* [M+H]<sup>+</sup> calcd for C<sub>30</sub>H<sub>20</sub>IN<sub>4</sub>O<sub>2</sub><sup>+</sup>: 595.0625; found: 595.0626.

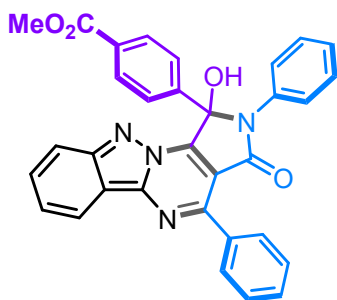

**methyl(*S*)-4-(1-hydroxy-3-oxo-2,4-diphenyl-2,3-dihydro-1*H*-pyrrolo[3',4':5,6]pyrimido[1,2-*b*]indazol-1-yl)benzoate (4n):**

Yield 62%; 326 mg; yellow solid; column chromatography, silica gel (PE:EA, 5:1); mp 196–198 °C. <sup>1</sup>H NMR (400 MHz, DMSO-*d*<sub>6</sub>) δ 8.48 (s, 1H), 8.39 (d, *J* = 8.4 Hz, 1H), 8.32–8.26 (m, 2H), 7.92 (s, 4H), 7.84 (d, *J* = 8.8 Hz, 1H), 7.68 (d, *J* = 7.2 Hz, 1H), 7.65–7.60 (m, 3H), 7.43 (d, *J* = 8.0 Hz, 2H), 7.40–7.32 (m, 3H), 7.24 (t, *J* = 7.2 Hz, 1H), 3.78 (s, 3H). <sup>13</sup>C NMR (100 MHz, DMSO-*d*<sub>6</sub>) δ 165.8, 163.1, 153.0, 151.8, 150.8, 144.4, 140.4, 135.5, 134.8, 131.1, 130.7, 130.2, 130.1, 129.1, 128.7, 127.9, 127.7, 127.4, 127.2, 122.1, 121.0, 116.8, 113.0, 112.1, 88.9, 52.2. HRMS (ESI): *m/z* [M+H]<sup>+</sup> calcd for C<sub>32</sub>H<sub>23</sub>N<sub>4</sub>O<sub>4</sub><sup>+</sup>: 527.1714; found: 527.1711.

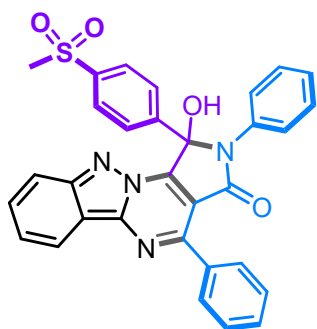

**(*S*)-1-hydroxy-1-(4-(methylsulfonyl)phenyl)-2,4-diphenyl-1,2-dihydro-3*H*-pyrrolo[3',4':5,6]pyrimido[1,2-*b*]indazol-3-one (4o):**

Yield 80%; 437 mg; yellow solid; column chromatography, silica gel (PE:EA, 3:1); mp 229–231 °C. <sup>1</sup>H NMR (400 MHz, DMSO-*d*<sub>6</sub>) δ 8.55 (s, 1H), 8.38 (d, *J* = 8.4 Hz, 1H), 8.29–8.24 (m, 2H), 8.05 (d, *J* = 8.4 Hz, 2H), 7.90 (d, *J* = 8.4 Hz, 2H), 7.85 (d, *J* = 8.8 Hz, 1H), 7.71–7.67 (m, 1H), 7.63 (d, *J* = 3.6 Hz, 3H), 7.44 (d, *J* = 7.6 Hz, 2H), 7.41–7.34 (m, 3H), 7.25 (t, *J* = 7.2 Hz, 1H), 3.20 (s, 3H). <sup>13</sup>C NMR (100 MHz, DMSO-*d*<sub>6</sub>) δ 163.0, 153.0, 151.6, 150.9, 144.4, 141.2, 140.8, 135.4, 134.7, 131.2, 130.7, 130.2, 128.8, 128.5, 127.9, 127.4, 127.2, 126.9, 122.1, 121.0, 116.9, 113.0, 112.1, 88.8, 43.2. HRMS (ESI): *m/z* [M+H]<sup>+</sup> calcd for C<sub>31</sub>H<sub>23</sub>N<sub>4</sub>O<sub>4</sub>S<sup>+</sup>: 547.1435; found: 547.1436.

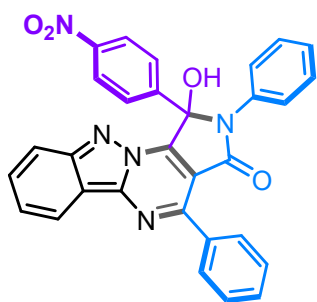

**(*S*)-1-hydroxy-1-(4-nitrophenyl)-2,4-diphenyl-1,2-dihydro-3*H*-pyrrolo[3',4':5,6]pyrimido[1,2-*b*]indazol-3-one (4p):**

Yield 55%; 282 mg; yellow solid; column chromatography, silica gel (PE:EA, 4:1); mp 212–214 °C. <sup>1</sup>H NMR (400 MHz, DMSO-*d*<sub>6</sub>) δ 8.62 (s, 1H), 8.39 (d, *J* = 8.4 Hz, 1H), 8.30–8.24 (m, 2H), 8.17 (d, *J* = 8.8 Hz, 2H), 8.05 (d, *J* = 8.8 Hz, 2H), 7.83 (d, *J* = 8.8 Hz, 1H), 7.71–7.66 (m, 1H), 7.65–7.60 (m, 3H), 7.45–7.34 (m, 5H), 7.25 (t, *J* = 7.2 Hz, 1H). <sup>13</sup>C NMR (100 MHz,

DMSO- $d_6$ )  $\delta$  163.1, 153.0, 151.4, 150.9, 147.8, 144.5, 142.5, 135.4, 134.6, 131.2, 130.6, 130.2, 128.9, 128.8, 127.9, 127.4, 127.3, 123.4, 122.1, 121.0, 116.8, 113.0, 112.2, 88.5. HRMS (ESI):  $m/z$   $[M+H]^+$  calcd for  $C_{30}H_{20}N_5O_4^+$ : 514.1510; found: 514.1511.

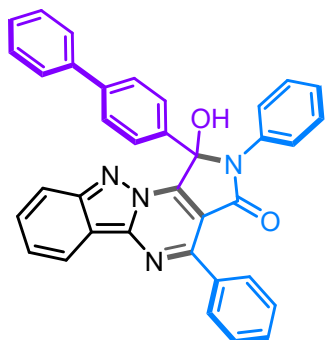

**(S)-1-([1,1'-biphenyl]-4-yl)-1-hydroxy-2,4-diphenyl-1,2-dihydro-3H-pyrrolo[3',4':5,6]pyrimido[1,2-b]indazol-3-one (4q):**

Yield 70%; 380 mg; yellow solid; column chromatography, silica gel (PE:EA, 7:1); mp 187–189 °C.  $^1H$  NMR (400 MHz, DMSO- $d_6$ )  $\delta$  8.38 (d,  $J$  = 8.4 Hz, 1H), 8.33 (s, 1H), 8.29–8.24 (m, 2H), 7.84 (dd,  $J$  = 8.0, 6.4 Hz, 3H), 7.71–7.65 (m, 2H), 7.64–7.60 (m, 6H), 7.49 (d,  $J$  = 7.6 Hz, 2H), 7.43–7.37 (m, 3H), 7.36–7.29 (m, 3H), 7.23 (t,  $J$  = 7.2 Hz, 1H).  $^{13}C$  NMR (100 MHz, DMSO- $d_6$ )  $\delta$  163.0, 152.9, 152.3, 150.8, 144.4, 140.3, 139.1, 135.5, 135.1, 134.2, 131.0, 130.7, 130.1, 128.9, 128.6, 127.9, 127.8, 127.7, 127.2, 126.9, 126.6, 126.4, 122.0, 121.0, 116.9, 113.0, 111.9, 89.3. HRMS (ESI):  $m/z$   $[M+H]^+$  calcd for  $C_{36}H_{25}N_4O_2^+$ : 545.1972; found: 545.1969.

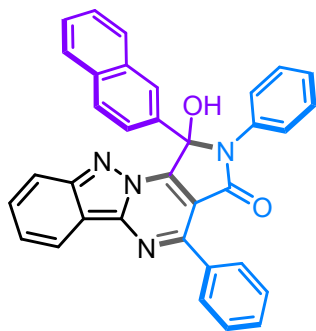

**(S)-1-hydroxy-1-(naphthalen-2-yl)-2,4-diphenyl-1,2-dihydro-3H-pyrrolo[3',4':5,6]pyrimido[1,2-b]indazol-3-one (4r):**

Yield 74%; 383 mg; orange solid; column chromatography, silica gel (PE:EA, 7:1); mp 220–222 °C.  $^1H$  NMR (400 MHz, DMSO- $d_6$ )  $\delta$  8.51 (s, 1H), 8.49 (s, 1H), 8.40 (d,  $J$  = 8.4 Hz, 1H), 8.35 (d,  $J$  = 6.8 Hz, 2H), 8.01 (d,  $J$  = 5.2 Hz, 1H), 7.89–7.84 (m, 2H), 7.80 (t,  $J$  = 9.2 Hz, 2H), 7.65 (t,  $J$  = 10.0 Hz, 4H), 7.51 (d,  $J$  = 2.0 Hz, 2H), 7.50 (s, 2H), 7.37–7.30 (m, 3H), 7.19 (t,  $J$  = 7.2 Hz, 1H).  $^{13}C$  NMR (100 MHz, DMSO- $d_6$ )  $\delta$  163.2, 152.9, 152.4, 150.9, 144.5, 135.6, 135.1, 133.0, 132.6, 131.0, 130.7, 130.2, 128.6, 128.4, 128.0, 127.9, 127.5, 127.4, 127.2, 127.0, 126.8, 126.3, 124.2, 122.0, 121.0, 116.8, 113.0, 112.1, 89.5. HRMS (ESI):  $m/z$   $[M+H]^+$  calcd for  $C_{34}H_{23}N_4O_2^+$ : 519.1816; found: 519.1814.

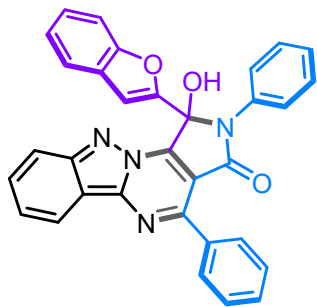

**(R)-1-(benzofuran-2-yl)-1-hydroxy-2,4-diphenyl-1,2-dihydro-3H-pyrrolo[3',4':5,6]pyrimido[1,2-b]indazol-3-one (4s):**

Yield 58%; 294 mg; orange solid; column chromatography, silica gel (PE:EA, 6:1); mp 200–202 °C. <sup>1</sup>H NMR (400 MHz, DMSO-*d*<sub>6</sub>) δ 8.64 (s, 1H), 8.38 (d, *J* = 8.4 Hz, 1H), 8.19 (dd, *J* = 6.4, 2.4 Hz, 2H), 7.87 (d, *J* = 8.8 Hz, 1H), 7.70 (d, *J* = 6.8 Hz, 1H), 7.66 (d, *J* = 5.2 Hz, 1H), 7.63–7.60 (m, 3H), 7.43 (d, *J* = 5.2 Hz, 1H), 7.40–7.34 (m, 4H), 7.30 (d, *J* = 8.0 Hz, 3H), 7.25–7.21 (m, 2H). <sup>13</sup>C NMR (100 MHz, DMSO-*d*<sub>6</sub>) δ 162.8, 154.2, 153.2, 150.5, 150.2, 150.0, 144.5, 135.2, 134.3, 131.3, 130.5, 130.3, 128.9, 128.0, 127.8, 127.3, 125.2, 123.3, 122.3, 121.8, 121.1, 116.9, 113.0, 112.0, 111.5, 108.9, 86.1. HRMS (ESI): *m/z* [M+H]<sup>+</sup> calcd for C<sub>32</sub>H<sub>21</sub>N<sub>4</sub>O<sub>3</sub><sup>+</sup>: 509.1608; found: 509.1608.

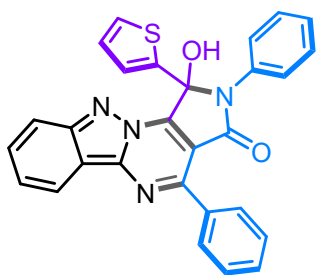

**(R)-1-hydroxy-2,4-diphenyl-1-(thiophen-2-yl)-1,2-dihydro-3H-pyrrolo[3',4':5,6]pyrimido[1,2-b]indazol-3-one (4t):**

Yield 65%; 308 mg; orange solid; column chromatography, silica gel (PE:EA, 6:1); mp 233–235 °C. <sup>1</sup>H NMR (400 MHz, DMSO-*d*<sub>6</sub>) δ 8.47 (s, 1H), 8.38 (d, *J* = 8.4 Hz, 1H), 8.20 (dd, *J* = 6.4, 2.8 Hz, 2H), 7.90 (d, *J* = 8.8 Hz, 1H), 7.74–7.69 (m, 1H), 7.62–7.58 (m, 3H), 7.50 (d, *J* = 5.2 Hz, 1H), 7.45 (d, *J* = 8.0 Hz, 2H), 7.39 (d, *J* = 7.6 Hz, 3H), 7.29 (d, *J* = 7.2 Hz, 1H), 7.25 (d, *J* = 2.8 Hz, 1H), 6.92 (dd, *J* = 4.8, 4.0 Hz, 1H). <sup>13</sup>C NMR (100 MHz, DMSO-*d*<sub>6</sub>) δ 162.4, 153.0, 151.6, 150.7, 144.5, 139.2, 135.4, 134.8, 131.1, 130.6, 130.2, 128.6, 127.8, 127.7, 127.2, 127.0, 126.9, 122.1, 121.0, 119.8, 116.9, 112.9, 111.3, 87.9. HRMS (ESI): *m/z* [M+H]<sup>+</sup> calcd for C<sub>28</sub>H<sub>19</sub>N<sub>4</sub>O<sub>2</sub>S<sup>+</sup>: 475.1223; found: 475.1224.

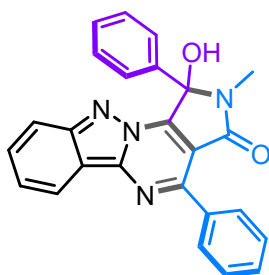

**1-hydroxy-2-methyl-1,4-diphenyl-1,2-dihydro-3*H*-pyrrolo[3',4':5,6]pyrimido[1,2-*b*]indazol-3-one (4u):**

Yield 70%; 284 mg; yellow solid; column chromatography, silica gel (PE:EA, 7:1); mp 279–281 °C; <sup>1</sup>H NMR (400 MHz, DMSO-*d*<sub>6</sub>) δ 8.34 (d, *J* = 7.2 Hz, 1H), 8.25–8.20 (m, 2H), 7.83 (d, *J* = 8.8 Hz, 1H), 7.71 (d, *J* = 5.6 Hz, 3H), 7.68–7.58 (m, 4H), 7.44 (t, *J* = 7.2 Hz, 2H), 7.41–7.32 (m, 2H), 2.78 (s, 3H). <sup>13</sup>C NMR (100 MHz, DMSO-*d*<sub>6</sub>) δ 163.0, 152.8, 152.7, 150.5, 144.1, 135.5, 134.7, 130.9, 130.5, 130.0, 129.0, 128.5, 127.8, 127.0, 121.8, 120.9, 116.7, 112.8, 112.3, 87.6, 23.5. HRMS (ESI): *m/z* [M+H]<sup>+</sup> calcd for C<sub>25</sub>H<sub>19</sub>N<sub>4</sub>O<sub>2</sub><sup>+</sup>: 407.1503; found: 407.1503.

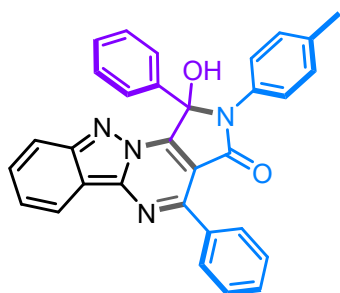

**(*S*)-1-hydroxy-1,4-diphenyl-2-(*p*-tolyl)-1,2-dihydro-3*H*-pyrrolo[3',4':5,6]pyrimido[1,2-*b*]indazol-3-one (4v):**

Yield 74%; 356 mg; yellow solid; column chromatography, silica gel (PE:EA, 8:1); mp 207–209 °C; <sup>1</sup>H NMR (400 MHz, DMSO-*d*<sub>6</sub>) δ 8.37 (d, *J* = 8.4 Hz, 1H), 8.24 (d, *J* = 4.0 Hz, 2H), 8.20 (s, 1H), 7.84 (d, *J* = 8.8 Hz, 1H), 7.74–7.66 (m, 3H), 7.61 (d, *J* = 4.0 Hz, 3H), 7.38–7.23 (m, 6H), 7.12 (d, *J* = 8.0 Hz, 2H), 2.24 (s, 3H). <sup>13</sup>C NMR (100 MHz, DMSO-*d*<sub>6</sub>) δ 162.9, 152.9, 152.4, 150.8, 144.4, 136.3, 135.5, 135.1, 132.3, 131.0, 130.6, 130.1, 129.1, 128.8, 128.2, 127.8, 127.3, 127.1, 121.9, 121.0, 116.8, 112.9, 112.0, 89.2, 20.6. HRMS (ESI): *m/z* [M+H]<sup>+</sup> calcd for C<sub>31</sub>H<sub>23</sub>N<sub>4</sub>O<sub>2</sub><sup>+</sup>: 483.1816; found: 483.1816.

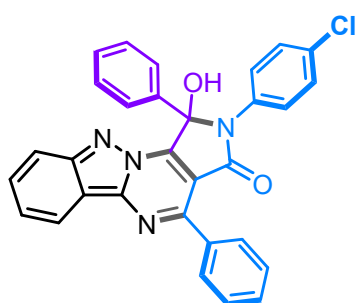

**(*S*)-2-(4-chlorophenyl)-1-hydroxy-1,4-diphenyl-1,2-dihydro-3*H*-pyrrolo[3',4':5,6]pyrimido[1,2-*b*]indazol-3-one (4w):**

Yield 68%; 341 mg; orange solid; column chromatography, silica gel (PE:EA, 8:1); mp 235–237 °C; <sup>1</sup>H NMR (400 MHz, DMSO-*d*<sub>6</sub>) δ 8.40 (s, 1H), 8.37 (d, *J* = 8.4 Hz, 1H), 8.26 (dd, *J* = 7.2, 2.0 Hz, 2H), 7.85 (d, *J* = 8.8 Hz, 1H), 7.76 (d, *J* = 7.2 Hz, 2H), 7.70–7.65 (m, 1H), 7.64–7.60 (m, 3H), 7.52 (d, *J* = 8.8 Hz, 2H), 7.41 (d, *J* = 8.8 Hz, 2H), 7.39–7.32 (m, 3H), 7.30 (d, *J* = 7.2 Hz, 1H). <sup>13</sup>C NMR (100 MHz, DMSO-*d*<sub>6</sub>) δ 163.0, 153.0, 152.3, 150.8, 144.5, 135.5, 134.8, 134.1, 131.11, 131.07, 130.6, 130.2, 129.0, 128.7, 128.3, 127.9, 127.2, 122.0, 121.0,



116.9, 113.0, 111.7, 89.4. HRMS (ESI):  $m/z$   $[M+H]^+$  calcd for  $C_{30}H_{20}ClN_4O_2^+$ : 503.1269; found: 503.1268.

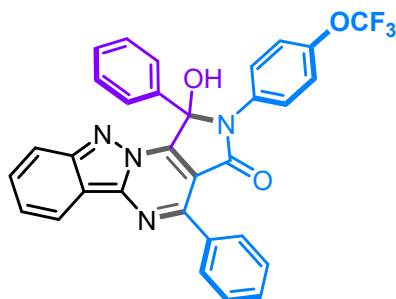

**(S)-1-hydroxy-1,4-diphenyl-2-(4-(trifluoromethoxy)phenyl)-1,2-dihydro-3H-pyrrolo[3',4':5,6]pyrimido[1,2-b]indazol-3-one (4x):**

Yield 69%; 380 mg; orange solid; column chromatography, silica gel (PE:EA, 7:1); mp 218–220 °C.  $^1H$  NMR (400 MHz, DMSO- $d_6$ )  $\delta$  8.41 (s, 1H), 8.38 (d,  $J$  = 8.4 Hz, 1H), 8.31–8.23 (m, 2H), 7.85 (d,  $J$  = 8.8 Hz, 1H), 7.79 (d,  $J$  = 7.6 Hz, 2H), 7.70–7.65 (m, 1H), 7.65–7.57 (m, 5H), 7.41–7.33 (m, 5H), 7.32–7.28 (m, 1H).  $^{13}C$  NMR (100 MHz, DMSO- $d_6$ )  $\delta$  163.1, 153.0, 152.3, 150.8, 146.5, 144.5, 135.5, 134.8, 134.2, 131.0, 130.6, 130.1, 129.0, 128.5, 128.3, 127.8, 127.2, 122.0, 121.2, 120.9, 120.0 (q,  $J$  = 255.0 Hz,  $^1J_{CF}$ ), 116.8, 113.0, 111.6, 89.5.  $^{19}F$  NMR (376 MHz, DMSO- $d_6$ )  $\delta$  -56.91. HRMS (ESI):  $m/z$   $[M+H]^+$  calcd for  $C_{31}H_{20}F_3N_4O_3^+$ : 553.1482; found: 553.1483.

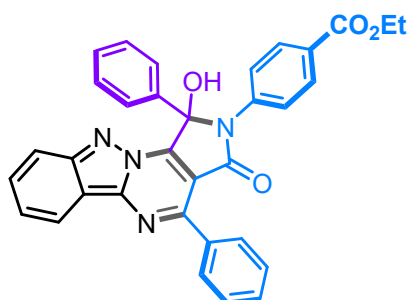

**ethyl(S)-4-(1-hydroxy-3-oxo-1,4-diphenyl-1,3-dihydro-2H-pyrrolo[3',4':5,6]pyrimido[1,2-b]indazol-2-yl)benzoate (4y):**

Yield 60%; 324 mg; orange solid; column chromatography, silica gel (PE:EA, 6:1); mp 233–235 °C.  $^1H$  NMR (400 MHz, DMSO- $d_6$ )  $\delta$  8.48 (s, 1H), 8.36 (d,  $J$  = 8.4 Hz, 1H), 8.23 (dd,  $J$  = 6.4, 2.8 Hz, 2H), 7.90 (d,  $J$  = 8.8 Hz, 2H), 7.85 (d,  $J$  = 8.8 Hz, 1H), 7.77 (t,  $J$  = 7.6 Hz, 4H), 7.71–7.67 (m, 1H), 7.65–7.61 (m, 3H), 7.40–7.36 (m, 1H), 7.35–7.26 (m, 3H), 4.28 (q,  $J$  = 7.2 Hz, 2H), 1.28 (t,  $J$  = 7.2 Hz, 3H).  $^{13}C$  NMR (100 MHz, DMSO- $d_6$ )  $\delta$  165.1, 163.0, 152.9, 152.1, 150.8, 144.4, 139.9, 135.4, 134.6, 131.1, 130.5, 130.1, 129.4, 128.9, 128.2, 127.8, 127.2, 127.1, 125.0, 122.0, 120.9, 116.8, 112.9, 111.4, 89.7, 60.7, 14.1. HRMS (ESI):  $m/z$   $[M+H]^+$  calcd for  $C_{33}H_{25}N_4O_4^+$ : 541.1870; found: 541.1868.

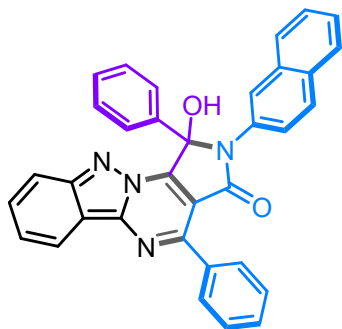

**(S)-1-hydroxy-2-(naphthalen-2-yl)-1,4-diphenyl-1,2-dihydro-3H-pyrrolo[3',4':5,6]pyrimido[1,2-b]indazol-3-one (4z):**

Yield 71%; 367 mg; yellow solid; column chromatography, silica gel (PE:EA, 8:1); mp 217–219 °C;  $^1\text{H}$  NMR (400 MHz,  $\text{DMSO-}d_6$ )  $\delta$  8.43 (s, 1H), 8.39 (d,  $J = 8.4$  Hz, 1H), 8.28 (dd,  $J = 7.6, 2.0$  Hz, 2H), 8.02 (d,  $J = 1.2$  Hz, 1H), 7.85 (t,  $J = 8.4$  Hz, 4H), 7.78 (d,  $J = 7.6$  Hz, 2H), 7.71–7.66 (m, 1H), 7.66–7.61 (m, 3H), 7.59 (d,  $J = 2.0$  Hz, 1H), 7.49 (dd,  $J = 6.4, 3.2$  Hz, 2H), 7.41–7.36 (m, 1H), 7.30 (t,  $J = 7.6$  Hz, 2H), 7.24 (t,  $J = 7.2$  Hz, 1H).  $^{13}\text{C}$  NMR (100 MHz,  $\text{DMSO-}d_6$ )  $\delta$  163.2, 152.9, 152.4, 150.8, 144.5, 135.6, 135.0, 132.8, 132.7, 131.4, 131.0, 130.6, 130.1, 128.9, 128.2, 128.0, 127.85, 127.77, 127.5, 127.2, 126.4, 126.2, 125.4, 125.0, 122.0, 121.0, 116.9, 113.0, 111.9, 89.6. HRMS (ESI):  $m/z$   $[\text{M}+\text{H}]^+$  calcd for  $\text{C}_{34}\text{H}_{23}\text{N}_4\text{O}_2^+$ : 519.1816; found: 519.1819.

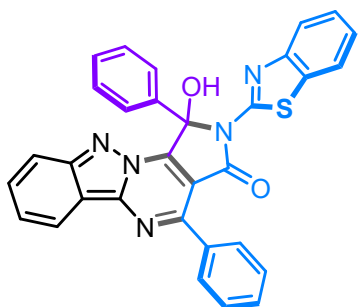

**(S)-2-(benzo[d]thiazol-2-yl)-1-hydroxy-1,4-diphenyl-1,2-dihydro-3H-pyrrolo[3',4':5,6]pyrimido[1,2-b]indazol-3-one (4aa):**

Yield 50%; 262 mg; orange solid; column chromatography, silica gel (PE:EA, 7:1); mp 264–266 °C.  $^1\text{H}$  NMR (400 MHz,  $\text{DMSO-}d_6$ )  $\delta$  8.52 (s, 1H), 8.35 (d,  $J = 8.4$  Hz, 1H), 8.24 (dd,  $J = 7.2, 2.0$  Hz, 2H), 8.01–7.96 (m, 3H), 7.89 (d,  $J = 8.8$  Hz, 1H), 7.70–7.65 (m, 5H), 7.41–7.37 (m, 4H), 7.31 (s, 2H).  $^{13}\text{C}$  NMR (100 MHz,  $\text{DMSO-}d_6$ )  $\delta$  162.8, 153.24, 153.15, 152.7, 150.9, 148.5, 144.7, 135.2, 134.6, 131.4, 131.2, 130.5, 130.4, 128.9, 128.0, 127.9, 127.4, 126.2, 124.2, 122.4, 121.5, 121.4, 121.0, 117.0, 113.0, 109.8, 91.0. HRMS (ESI):  $m/z$   $[\text{M}+\text{H}]^+$  calcd for  $\text{C}_{31}\text{H}_{20}\text{N}_5\text{O}_2\text{S}^+$ : 526.1332; found: 526.1334.

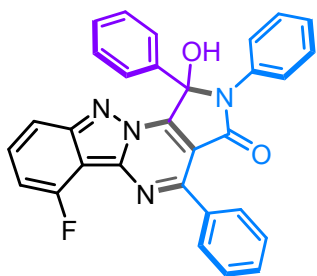

**(S)-6-fluoro-1-hydroxy-1,2,4-triphenyl-1,2-dihydro-3H-pyrrolo[3',4':5,6]pyrimido[1,2-b]indazol-3-one (4ab):**

Yield 66%; 320 mg; yellow solid; column chromatography, silica gel (PE:EA, 6:1); mp 208–210 °C;  $^1\text{H}$  NMR (400 MHz,  $\text{DMSO-}d_6$ )  $\delta$  8.29 (s, 1H), 8.23 (dd,  $J = 6.4, 2.8$  Hz, 2H), 7.71 (d,  $J = 6.8$  Hz, 2H), 7.67–7.60 (m, 5H), 7.39 (d,  $J = 7.6$  Hz, 2H), 7.36–7.28 (m, 5H), 7.23 (t,  $J = 7.2$  Hz, 1H), 7.15–7.08 (m, 1H).  $^{13}\text{C}$  NMR (100 MHz,  $\text{DMSO-}d_6$ )  $\delta$  162.7, 156.3 (d,  $J = 255.0$  Hz,  $^1J_{\text{CF}}$ ), 154.4 (d,  $J = 4.0$  Hz,  $^4J_{\text{CF}}$ ), 152.4, 152.0, 142.8 (d,  $J = 6.0$  Hz,  $^3J_{\text{CF}}$ ), 135.3, 134.9 (d,  $J = 5.0$  Hz,  $^3J_{\text{CF}}$ ), 131.6 (d,  $J = 7.0$  Hz,  $^3J_{\text{CF}}$ ), 130.7, 130.3, 129.0, 128.6, 128.3, 127.9, 127.3, 127.2, 127.0, 113.1, 112.3, 105.6 (d,  $J = 17.0$  Hz,  $^2J_{\text{CF}}$ ), 103.3 (d,  $J = 18.0$  Hz,  $^2J_{\text{CF}}$ ), 89.4.  $^{19}\text{F}$  NMR (376 MHz,  $\text{DMSO-}d_6$ )  $\delta$  -115.78. HRMS (ESI):  $m/z$   $[\text{M}+\text{H}]^+$  calcd for  $\text{C}_{30}\text{H}_{20}\text{FN}_4\text{O}_2^+$ : 487.1565; found: 487.1567.

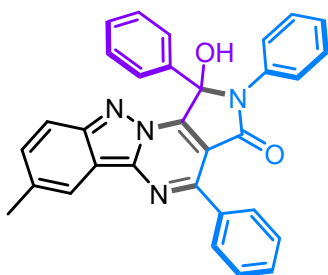

**(S)-1-hydroxy-7-methyl-1,2,4-triphenyl-1,2-dihydro-3H-pyrrolo[3',4':5,6]pyrimido[1,2-b]indazol-3-one (4ac):**

Yield 74%; 356 mg; yellow solid; column chromatography, silica gel (PE:EA, 8:1); mp 251–253 °C.  $^1\text{H}$  NMR (400 MHz,  $\text{DMSO-}d_6$ )  $\delta$  8.30 (s, 1H), 8.29–8.27 (m, 2H), 8.15 (s, 1H), 7.77 (d,  $J = 8.4$  Hz, 3H), 7.65–7.60 (m, 3H), 7.51 (dd,  $J = 9.2, 1.2$  Hz, 1H), 7.46 (d,  $J = 7.6$  Hz, 2H), 7.37–7.29 (m, 5H), 7.23 (t,  $J = 7.6$  Hz, 1H), 2.50 (s, 3H).  $^{13}\text{C}$  NMR (100 MHz,  $\text{DMSO-}d_6$ )  $\delta$  163.1, 152.4, 151.9, 150.2, 143.8, 135.7, 135.1, 133.6, 131.3, 130.6, 130.0, 128.9, 128.5, 128.2, 127.8, 127.20, 127.16, 126.8, 119.1, 116.7, 113.1, 111.5, 89.4, 21.3. HRMS (ESI):  $m/z$   $[\text{M}+\text{H}]^+$  calcd for  $\text{C}_{31}\text{H}_{23}\text{N}_4\text{O}_2^+$ : 483.1816; found: 483.1820.

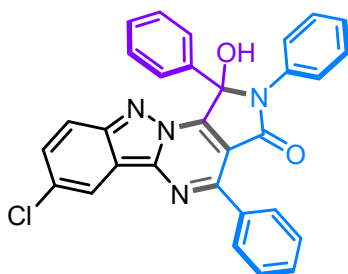

**(S)-7-chloro-1-hydroxy-1,2,4-triphenyl-1,2-dihydro-3H-pyrrolo[3',4':5,6]pyrimido[1,2-b]indazol-3-one (4ad):**

Yield 68%; 341 mg; yellow solid; column chromatography, silica gel (PE:EA, 8:1); mp 227–229 °C; <sup>1</sup>H NMR (400 MHz, DMSO-*d*<sub>6</sub>) δ 8.38 (s, 1H), 8.32–8.26 (m, 3H), 7.86 (d, *J* = 9.2 Hz, 1H), 7.75 (d, *J* = 7.2 Hz, 2H), 7.64–7.59 (m, 4H), 7.43 (d, *J* = 7.6 Hz, 2H), 7.36–7.29 (m, 5H), 7.23 (t, *J* = 7.2 Hz, 1H). <sup>13</sup>C NMR (100 MHz, DMSO-*d*<sub>6</sub>) δ 162.8, 152.8, 151.5, 151.1, 143.9, 135.3, 135.0, 134.9, 131.6, 130.7, 130.3, 129.0, 128.6, 128.3, 127.8, 127.3, 127.2, 127.0, 126.2, 119.8, 118.9, 113.5, 112.5, 89.3. HRMS (ESI): *m/z* [M+H]<sup>+</sup> calcd for C<sub>30</sub>H<sub>20</sub>ClN<sub>4</sub>O<sub>2</sub><sup>+</sup>: 503.1269; found: 503.1271.

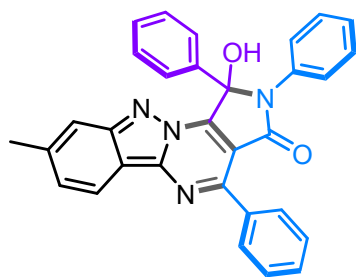

**(S)-1-hydroxy-8-methyl-1,2,4-triphenyl-1,2-dihydro-3H-pyrrolo[3',4':5,6]pyrimido[1,2-b]indazol-3-one (4ae):**

Yield 76%; 366 mg; yellow solid; column chromatography, silica gel (PE:EA, 8:1); mp 244–246 °C. <sup>1</sup>H NMR (400 MHz, DMSO-*d*<sub>6</sub>) δ 8.28 (s, 1H), 8.25 (d, *J* = 8.4 Hz, 3H), 7.73 (d, *J* = 7.2 Hz, 2H), 7.62 (d, *J* = 3.6 Hz, 4H), 7.43 (d, *J* = 8.0 Hz, 2H), 7.37–7.28 (m, 5H), 7.26–7.19 (m, 2H), 2.50 (s, 3H). <sup>13</sup>C NMR (100 MHz, DMSO-*d*<sub>6</sub>) δ 163.1, 153.6, 152.3, 150.7, 144.3, 141.3, 135.6, 135.1, 130.6, 130.1, 128.8, 128.5, 128.2, 127.8, 127.2, 126.8, 124.6, 120.5, 115.4, 111.4, 111.1, 89.3, 22.1. HRMS (ESI): *m/z* [M+H]<sup>+</sup> calcd for C<sub>31</sub>H<sub>23</sub>N<sub>4</sub>O<sub>2</sub><sup>+</sup>: 483.1816; found: 483.1814.

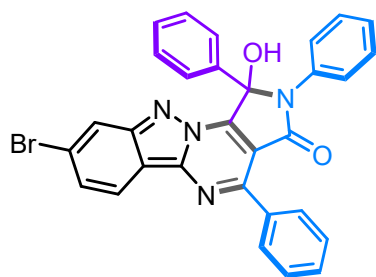

**(S)-8-bromo-1-hydroxy-1,2,4-triphenyl-1,2-dihydro-3H-pyrrolo[3',4':5,6]pyrimido[1,2-b]indazol-3-one (4af):**

Yield 71%; 387 mg; yellow solid; column chromatography, silica gel (PE:EA, 8:1); mp 227–229 °C; <sup>1</sup>H NMR (400 MHz, DMSO-*d*<sub>6</sub>) δ 8.31 (s, 1H), 8.30–8.22 (m, 3H), 8.07 (s, 1H), 7.74 (d, *J* = 7.2 Hz, 2H), 7.65–7.59 (m, 3H), 7.46–7.38 (m, 3H), 7.37–7.28 (m, 5H), 7.23 (t, *J* = 7.2 Hz, 1H). <sup>13</sup>C NMR (100 MHz, DMSO-*d*<sub>6</sub>) δ 162.8, 153.3, 152.7, 151.9, 144.6, 135.3, 134.94, 134.86, 130.7, 130.3, 128.9, 128.5, 128.2, 127.8, 127.24, 127.18, 127.0, 125.1, 124.5, 122.8, 119.0, 112.4, 111.7, 89.3. HRMS (ESI): *m/z* [M+H]<sup>+</sup> calcd for C<sub>30</sub>H<sub>20</sub>BrN<sub>4</sub>O<sub>2</sub><sup>+</sup>: 547.0764; found: 547.0768.

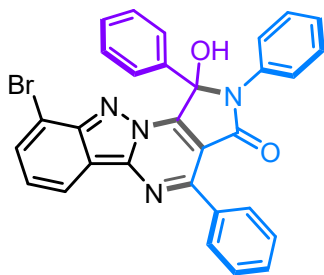

**(S)-9-bromo-1-hydroxy-1,2,4-triphenyl-1,2-dihydro-3H-pyrrolo[3',4':5,6]pyrimido[1,2-b]indazol-3-one (4ag):**

Yield 66%; 360 mg; yellow solid; column chromatography, silica gel (PE:EA, 8:1); mp 183–185 °C;  $^1\text{H}$  NMR (400 MHz,  $\text{DMSO-}d_6$ )  $\delta$  8.37 (s, 1H), 8.34 (d,  $J = 6.4$  Hz, 1H), 8.31 (s, 1H), 8.29 (s, 1H), 7.93–7.87 (m, 3H), 7.65–7.62 (m, 3H), 7.56 (d,  $J = 7.6$  Hz, 2H), 7.38–7.30 (m, 5H), 7.25–7.19 (m, 2H).  $^{13}\text{C}$  NMR (100 MHz,  $\text{DMSO-}d_6$ )  $\delta$  162.9, 153.0, 151.9, 150.8, 145.0, 135.24, 135.20, 134.5, 133.5, 130.7, 130.4, 129.0, 128.6, 128.1, 127.8, 127.7, 126.8, 126.7, 122.6, 120.6, 114.2, 112.3, 109.7, 89.5. HRMS (ESI):  $m/z$   $[\text{M}+\text{H}]^+$  calcd for  $\text{C}_{30}\text{H}_{20}\text{BrN}_4\text{O}_2^+$ : 547.0764; found: 547.0763.

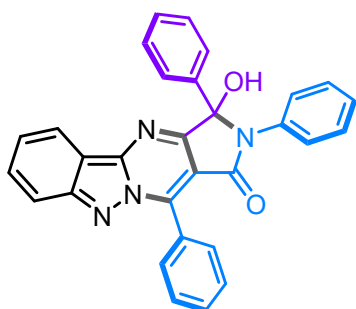

**(S)-3-hydroxy-2,3,11-triphenyl-2,3-dihydro-1H-pyrrolo[3',4':4,5]pyrimido[1,2-b]indazol-1-one (5a):**

Yield 67%; 313 mg; orange solid; column chromatography, silica gel (PE:EA, 6:1); mp 191–193 °C.  $^1\text{H}$  NMR (400 MHz,  $\text{DMSO-}d_6$ )  $\delta$  8.24 (d,  $J = 8.4$  Hz, 1H), 8.04 (dd,  $J = 8.4, 2.8$  Hz, 3H), 7.82 (d,  $J = 8.8$  Hz, 1H), 7.72–7.64 (m, 4H), 7.61 (d,  $J = 7.2$  Hz, 2H), 7.42 (d,  $J = 7.6$  Hz, 2H), 7.36–7.27 (m, 6H), 7.18 (t,  $J = 7.2$  Hz, 1H).  $^{13}\text{C}$  NMR (100 MHz,  $\text{DMSO-}d_6$ )  $\delta$  162.4, 162.3, 151.8, 145.2, 144.5, 138.2, 135.6, 131.2, 131.1, 130.7, 128.4, 128.2, 127.7, 127.0, 126.8, 126.7, 121.7, 120.9, 116.6, 112.5, 111.3, 90.8. HRMS (ESI):  $m/z$   $[\text{M}+\text{H}]^+$  calcd for  $\text{C}_{30}\text{H}_{21}\text{N}_4\text{O}_2^+$ : 469.1659; found: 469.1661.

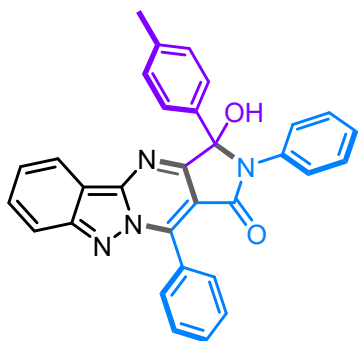

**(S)-3-hydroxy-2,11-diphenyl-3-(*p*-tolyl)-2,3-dihydro-1*H*-pyrrolo[3',4':4,5]pyrimido[1,2-*b*]indazol-1-one (5b):**

Yield 69%; 332 mg; orange solid; column chromatography, silica gel (PE:EA, 6:1); mp 238–240 °C. <sup>1</sup>H NMR (400 MHz, DMSO-*d*<sub>6</sub>) δ 8.24 (d, *J* = 8.4 Hz, 1H), 8.09-8.03 (m, 2H), 8.00 (s, 1H), 7.83 (d, *J* = 8.8 Hz, 1H), 7.71-7.63 (m, 4H), 7.50 (d, *J* = 8.0 Hz, 2H), 7.46 (d, *J* = 8.0 Hz, 2H), 7.35-7.27 (m, 3H), 7.18 (t, *J* = 7.6 Hz, 1H), 7.14 (d, *J* = 8.0 Hz, 2H), 2.25 (s, 3H). <sup>13</sup>C NMR (100 MHz, DMSO-*d*<sub>6</sub>) δ 162.6, 162.3, 151.8, 145.2, 144.4, 137.7, 135.7, 135.2, 131.3, 131.1, 130.7, 128.9, 128.4, 127.7, 127.0, 126.8, 126.6, 121.7, 120.9, 116.6, 112.5, 111.2, 90.8, 20.7. HRMS (ESI): *m/z* [M+H]<sup>+</sup> calcd for C<sub>31</sub>H<sub>23</sub>N<sub>4</sub>O<sub>2</sub><sup>+</sup>: 483.1816; found: 483.1816.

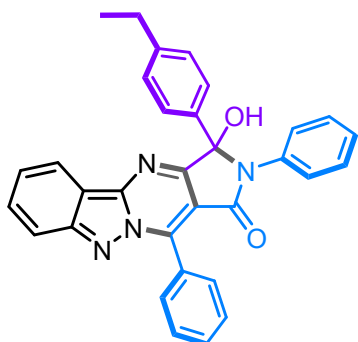

**(S)-3-(4-ethylphenyl)-3-hydroxy-2,11-diphenyl-2,3-dihydro-1*H*-pyrrolo[3',4':4,5]pyrimido[1,2-*b*]indazol-1-one (5c):**

Yield 68%; 337 mg; orange solid; column chromatography, silica gel (PE:EA, 6:1); mp 227–230 °C. <sup>1</sup>H NMR (400 MHz, DMSO-*d*<sub>6</sub>) δ 8.25 (d, *J* = 8.4 Hz, 1H), 8.06 (dd, *J* = 7.2, 2.4 Hz, 2H), 8.03 (s, 1H), 7.83 (d, *J* = 8.8 Hz, 1H), 7.70-7.63 (m, 4H), 7.55 (d, *J* = 8.4 Hz, 2H), 7.49 (d, *J* = 7.6 Hz, 2H), 7.34-7.28 (m, 3H), 7.19 (t, *J* = 7.2 Hz, 3H), 2.55 (q, *J* = 7.6 Hz, 2H), 1.13 (t, *J* = 7.6 Hz, 3H). <sup>13</sup>C NMR (100 MHz, DMSO-*d*<sub>6</sub>) δ 162.6, 162.3, 151.8, 145.2, 144.5, 143.8, 135.8, 135.4, 131.3, 131.1, 130.7, 128.4, 127.72, 127.67, 127.0, 126.8, 126.6, 121.7, 120.9, 116.6, 112.5, 111.2, 90.9, 27.8, 15.2. HRMS (ESI): *m/z* [M+H]<sup>+</sup> calcd for C<sub>32</sub>H<sub>25</sub>N<sub>4</sub>O<sub>2</sub><sup>+</sup>: 497.1972; found: 497.1972.

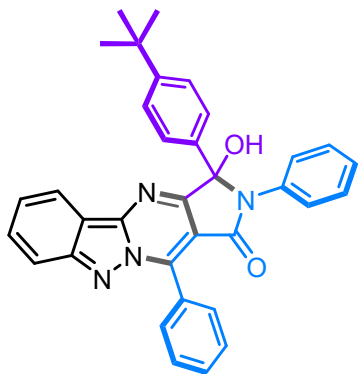

**(S)-3-(4-(tert-butyl)phenyl)-3-hydroxy-2,11-diphenyl-2,3-dihydro-1H-pyrrolo[3',4':4,5]pyrimido[1,2-b]indazol-1-one (5d):**

Yield 71%; 372 mg; orange solid; column chromatography, silica gel (PE:EA, 6:1); mp 245–247 °C. <sup>1</sup>H NMR (400 MHz, DMSO-*d*<sub>6</sub>) δ 8.25 (d, *J* = 8.4 Hz, 1H), 8.01 (d, *J* = 6.8 Hz, 2H), 7.99 (s, 1H), 7.81 (d, *J* = 8.8 Hz, 1H), 7.70–7.63 (m, 4H), 7.54 (d, *J* = 8.4 Hz, 2H), 7.49 (d, *J* = 8.0 Hz, 2H), 7.35 (d, *J* = 8.4 Hz, 2H), 7.29 (d, *J* = 7.6 Hz, 3H), 7.19 (t, *J* = 7.2 Hz, 1H), 1.22 (s, 9H). <sup>13</sup>C NMR (100 MHz, DMSO-*d*<sub>6</sub>) δ 162.5, 162.3, 151.7, 150.6, 145.1, 144.5, 135.8, 135.1, 131.2, 131.1, 130.7, 128.4, 127.7, 126.8, 126.7, 126.55, 126.47, 125.1, 121.7, 120.9, 116.6, 112.5, 111.0, 90.9, 34.3, 31.0. HRMS (ESI): *m/z* [M+H]<sup>+</sup> calcd for C<sub>34</sub>H<sub>29</sub>N<sub>4</sub>O<sub>2</sub><sup>+</sup>: 525.2285; found: 525.2288.

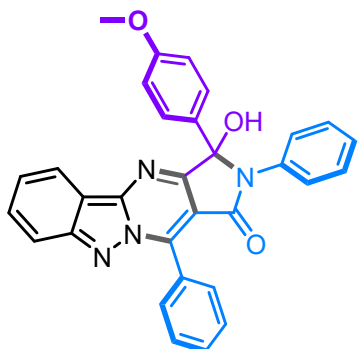

**(S)-3-hydroxy-3-(4-methoxyphenyl)-2,11-diphenyl-2,3-dihydro-1H-pyrrolo[3',4':4,5]pyrimido[1,2-b]indazol-1-one (5e):**

Yield 71%; 353 mg; orange solid; column chromatography, silica gel (PE:EA, 5:1); mp 206–208 °C. <sup>1</sup>H NMR (400 MHz, DMSO-*d*<sub>6</sub>) δ 8.26 (d, *J* = 8.4 Hz, 1H), 8.10–8.03 (m, 2H), 8.00 (s, 1H), 7.83 (d, *J* = 8.8 Hz, 1H), 7.72–7.63 (m, 4H), 7.56 (d, *J* = 8.8 Hz, 2H), 7.48 (d, *J* = 8.0 Hz, 2H), 7.32 (t, *J* = 8.0 Hz, 3H), 7.20 (t, *J* = 7.2 Hz, 1H), 6.90 (d, *J* = 8.8 Hz, 2H), 3.71 (s, 3H). <sup>13</sup>C NMR (100 MHz, DMSO-*d*<sub>6</sub>) δ 162.7, 162.3, 159.1, 151.8, 145.2, 144.4, 135.8, 131.3, 131.1, 130.7, 130.0, 128.4, 127.7, 126.8, 126.6, 121.7, 120.8, 116.6, 113.6, 112.5, 111.3, 90.8, 55.0. HRMS (ESI): *m/z* [M+H]<sup>+</sup> calcd for C<sub>31</sub>H<sub>23</sub>N<sub>4</sub>O<sub>3</sub><sup>+</sup>: 499.1765; found: 499.1765.

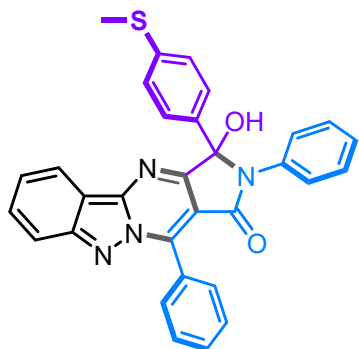

**(S)-3-hydroxy-3-(4-(methylthio)phenyl)-2,11-diphenyl-2,3-dihydro-1H-pyrrolo[3',4':4,5]pyrimido[1,2-b]indazol-1-one (5f):**

Yield 67%; 344 mg; orange solid; column chromatography, silica gel (PE:EA, 5:1); mp 241–243 °C. <sup>1</sup>H NMR (400 MHz, DMSO-*d*<sub>6</sub>) δ 8.27 (d, *J* = 8.4 Hz, 1H), 8.09 (s, 2H), 8.07 (d, *J* = 3.6 Hz, 1H), 7.84 (d, *J* = 8.8 Hz, 1H), 7.71–7.64 (m, 4H), 7.59 (d, *J* = 8.4 Hz, 2H), 7.51 (d, *J* = 8.0 Hz, 2H), 7.33 (t, *J* = 7.6 Hz, 3H), 7.21 (t, *J* = 7.6 Hz, 3H), 2.42 (s, 3H). <sup>13</sup>C NMR (100 MHz, DMSO-*d*<sub>6</sub>) δ 162.4, 162.3, 151.8, 145.2, 144.5, 138.7, 135.7, 134.5, 131.3, 131.1, 130.7, 128.4, 127.7, 127.6, 126.8, 126.7, 126.5, 125.2, 121.7, 120.8, 116.6, 112.5, 111.2, 90.7, 14.2. HRMS (ESI): *m/z* [M+H]<sup>+</sup> calcd for C<sub>31</sub>H<sub>23</sub>N<sub>4</sub>O<sub>2</sub>S<sup>+</sup>: 515.1536; found: 515.1536.

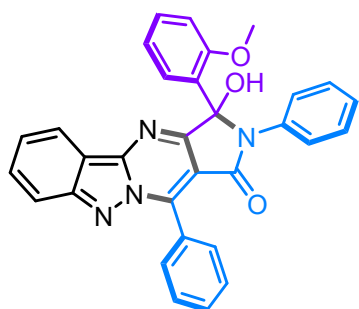

**(S)-3-hydroxy-3-(2-methoxyphenyl)-2,11-diphenyl-2,3-dihydro-1H-pyrrolo[3',4':4,5]pyrimido[1,2-b]indazol-1-one (5g):**

Yield 60%; 298 mg; orange solid; column chromatography, silica gel (PE:EA, 5:1); mp 203–205 °C. <sup>1</sup>H NMR (400 MHz, DMSO-*d*<sub>6</sub>) δ 8.27 (d, *J* = 8.4 Hz, 1H), 8.04 (s, 1H), 8.03–7.99 (m, 2H), 7.93 (dd, *J* = 8.0, 1.6 Hz, 1H), 7.85 (d, *J* = 8.8 Hz, 1H), 7.73–7.69 (m, 3H), 7.68–7.63 (m, 1H), 7.40–7.36 (m, 2H), 7.33–7.26 (m, 4H), 7.17 (t, *J* = 7.2 Hz, 1H), 7.02–6.97 (m, 1H), 6.86 (d, *J* = 8.0 Hz, 1H), 3.47 (s, 3H). <sup>13</sup>C NMR (100 MHz, DMSO-*d*<sub>6</sub>) δ 163.4, 162.5, 155.5, 151.5, 144.7, 143.7, 135.6, 131.0, 130.9, 130.5, 129.1, 128.3, 127.9, 126.9, 126.8, 126.5, 125.3, 121.6, 120.8, 120.1, 116.6, 112.6, 112.5, 111.5, 88.8, 55.6. HRMS (ESI): *m/z* [M+H]<sup>+</sup> calcd for C<sub>31</sub>H<sub>23</sub>N<sub>4</sub>O<sub>3</sub><sup>+</sup>: 499.1765; found: 499.1764.



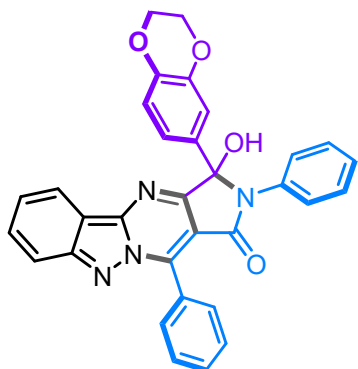

**(S)-3-(2,3-dihydrobenzo[*b*][1,4]dioxin-6-yl)-3-hydroxy-2,11-diphenyl-2,3-dihydro-1*H*-pyrrolo[3',4':4,5]pyrimido[1,2-*b*]indazol-1-one (5h):**

Yield 73%; 384 mg; yellow solid; column chromatography, silica gel (PE:EA, 5:1); mp 189–191 °C. <sup>1</sup>H NMR (400 MHz, DMSO-*d*<sub>6</sub>) δ 8.27 (d, *J* = 8.0 Hz, 1H), 8.03 (d, *J* = 5.2 Hz, 2H), 7.96 (s, 1H), 7.82 (d, *J* = 8.4 Hz, 1H), 7.67 (s, 4H), 7.46 (d, *J* = 7.2 Hz, 2H), 7.32 (t, *J* = 7.2 Hz, 3H), 7.22 (d, *J* = 6.8 Hz, 1H), 7.11 (s, 1H), 7.04 (d, *J* = 8.0 Hz, 1H), 6.79 (d, *J* = 8.4 Hz, 1H), 4.19 (s, 4H). <sup>13</sup>C NMR (100 MHz, DMSO-*d*<sub>6</sub>) δ 162.4, 162.3, 151.7, 145.2, 144.4, 143.4, 142.9, 135.7, 131.3, 131.1, 130.7, 128.4, 127.7, 126.8, 126.6, 126.5, 121.7, 120.9, 120.0, 116.8, 116.7, 116.0, 112.5, 111.2, 90.5, 64.01, 63.95. HRMS (ESI): *m/z* [M+H]<sup>+</sup> calcd for C<sub>32</sub>H<sub>23</sub>N<sub>4</sub>O<sub>4</sub><sup>+</sup>: 527.1714; found: 527.1714.

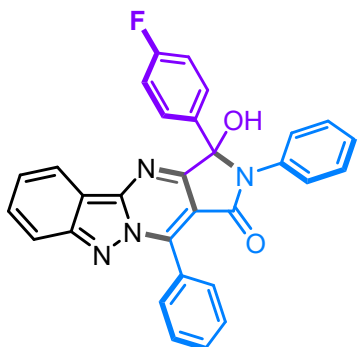

**(S)-3-(4-fluorophenyl)-3-hydroxy-2,11-diphenyl-2,3-dihydro-1*H*-pyrrolo[3',4':4,5]pyrimido[1,2-*b*]indazol-1-one (5i):**

Yield 64%; 311 mg; orange solid; column chromatography, silica gel (PE:EA, 5:1); mp 196–198 °C. <sup>1</sup>H NMR (400 MHz, DMSO-*d*<sub>6</sub>) δ 8.25 (d, *J* = 8.4 Hz, 1H), 8.12 (s, 1H), 8.05 (dd, *J* = 7.2, 2.0 Hz, 2H), 7.83 (d, *J* = 8.8 Hz, 1H), 7.73–7.61 (m, 6H), 7.41 (d, *J* = 7.6 Hz, 2H), 7.36–7.28 (m, 3H), 7.25–7.11 (m, 3H). <sup>13</sup>C NMR (100 MHz, DMSO-*d*<sub>6</sub>) δ 162.3, 162.2, 162.0 (d, *J* = 244.0 Hz, <sup>1</sup>*J*<sub>CF</sub>), 151.8, 145.2, 144.5, 135.4, 134.4 (d, *J* = 2.0 Hz, <sup>4</sup>*J*<sub>CF</sub>), 131.2, 131.1, 130.7, 129.3 (d, *J* = 9.0 Hz, <sup>3</sup>*J*<sub>CF</sub>), 128.4, 127.7, 126.8, 121.7, 120.8, 116.6, 115.0 (d, *J* = 22.0 Hz, <sup>2</sup>*J*<sub>CF</sub>), 112.5, 111.3, 90.4. <sup>19</sup>F NMR (376 MHz, DMSO-*d*<sub>6</sub>) δ -113.67. HRMS (ESI): *m/z* [M+H]<sup>+</sup> calcd for C<sub>30</sub>H<sub>20</sub>FN<sub>4</sub>O<sub>2</sub><sup>+</sup>: 487.1565; found: 487.1565.

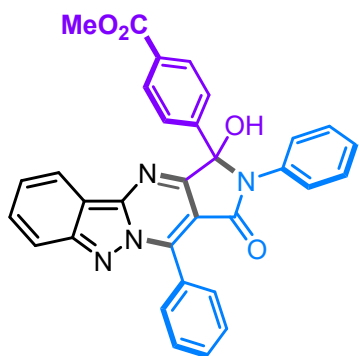

**methyl(*S*)-4-(3-hydroxy-1-oxo-2,11-diphenyl-2,3-dihydro-1*H*-pyrrolo[3',4':4,5]pyrimido[1,2-*b*]indazol-3-yl)benzoate (5j):**

Yield 51%; 268 mg; orange solid; column chromatography, silica gel (PE:EA, 4:1); mp 182–184 °C. <sup>1</sup>H NMR (400 MHz, DMSO-*d*<sub>6</sub>) δ 8.24 (s, 1H), 8.22 (s, 1H), 8.04 (d, *J* = 6.0 Hz, 2H), 7.90 (d, *J* = 8.4 Hz, 2H), 7.83 (d, *J* = 8.8 Hz, 1H), 7.76 (d, *J* = 8.4 Hz, 2H), 7.70-7.64 (m, 4H), 7.39 (d, *J* = 8.0 Hz, 2H), 7.30 (d, *J* = 8.0 Hz, 3H), 7.19 (t, *J* = 7.6 Hz, 1H), 3.81 (s, 3H). <sup>13</sup>C NMR (100 MHz, DMSO-*d*<sub>6</sub>) δ 165.8, 162.4, 161.9, 151.8, 145.2, 144.6, 143.4, 135.3, 131.3, 131.2, 130.8, 129.7, 129.1, 128.5, 127.7, 127.6, 126.9, 126.8, 126.7, 121.8, 120.8, 116.7, 112.5, 111.2, 90.4, 52.2. HRMS (ESI): *m/z* [M+H]<sup>+</sup> calcd for C<sub>32</sub>H<sub>23</sub>N<sub>4</sub>O<sub>4</sub><sup>+</sup>: 527.1714; found: 527.1712.

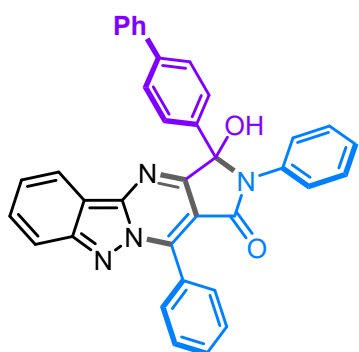

**(*S*)-3-((1,1'-biphenyl)-4-yl)-3-hydroxy-2,11-diphenyl-2,3-dihydro-1*H*-pyrrolo[3',4':4,5]pyrimido[1,2-*b*]indazol-1-one (5k):**

Yield 66%; 359 mg; orange solid; column chromatography, silica gel (PE:EA, 5:1); mp 192–194 °C. <sup>1</sup>H NMR (400 MHz, DMSO-*d*<sub>6</sub>) δ 8.25 (d, *J* = 8.4 Hz, 1H), 8.14 (s, 1H), 8.08 (d, *J* = 4.4 Hz, 2H), 7.84 (d, *J* = 8.8 Hz, 1H), 7.74 (d, *J* = 8.0 Hz, 2H), 7.69 (d, *J* = 4.8 Hz, 3H), 7.67-7.62 (m, 5H), 7.53 (d, *J* = 7.6 Hz, 2H), 7.42 (t, *J* = 7.6 Hz, 2H), 7.36-7.29 (m, 4H), 7.20 (t, *J* = 7.2 Hz, 1H). <sup>13</sup>C NMR (100 MHz, DMSO-*d*<sub>6</sub>) δ 162.4, 151.8, 145.2, 144.5, 140.1, 139.3, 137.3, 135.7, 131.3, 131.1, 130.7, 130.6, 129.2, 128.9, 128.5, 127.7, 127.3, 127.2, 126.8, 126.7, 126.6, 126.5, 121.7, 120.9, 116.7, 112.5, 111.2, 90.8. HRMS (ESI): *m/z* [M+H]<sup>+</sup> calcd for C<sub>36</sub>H<sub>25</sub>N<sub>4</sub>O<sub>2</sub><sup>+</sup>: 545.1972; found: 545.1972.

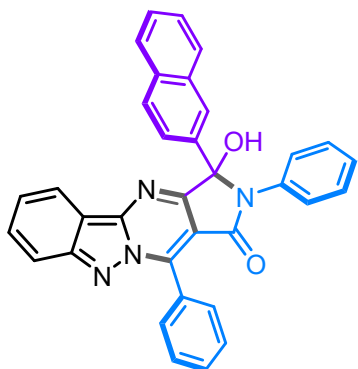

**(S)-3-hydroxy-3-(naphthalen-2-yl)-2,11-diphenyl-2,3-dihydro-1H-pyrrolo[3',4':4,5]pyrimido[1,2-b]indazol-1-one (5l):**

Yield 66%; 342 mg; orange solid; column chromatography, silica gel (PE:EA, 5:1); mp 215–217 °C. <sup>1</sup>H NMR (400 MHz, DMSO-*d*<sub>6</sub>) δ 8.35 (s, 1H), 8.21 (s, 2H), 8.09 (s, 2H), 7.99 (s, 1H), 7.84 (d, *J* = 8.8 Hz, 3H), 7.70 (s, 3H), 7.66–7.58 (m, 2H), 7.51 (s, 2H), 7.47 (d, *J* = 7.6 Hz, 2H), 7.31–7.21 (m, 3H), 7.15 (d, *J* = 6.8 Hz, 1H). <sup>13</sup>C NMR (100 MHz, DMSO-*d*<sub>6</sub>) δ 162.5, 162.4, 151.8, 145.2, 144.5, 135.6, 135.5, 132.7, 132.5, 131.3, 131.1, 130.7, 128.4, 128.3, 127.9, 127.7, 127.5, 126.8, 126.7, 126.6, 126.4, 124.5, 121.7, 120.8, 116.6, 112.5, 111.4, 90.9. HRMS (ESI): *m/z* [M+H]<sup>+</sup> calcd for C<sub>34</sub>H<sub>23</sub>N<sub>4</sub>O<sub>2</sub><sup>+</sup>: 519.1816; found: 519.1816.

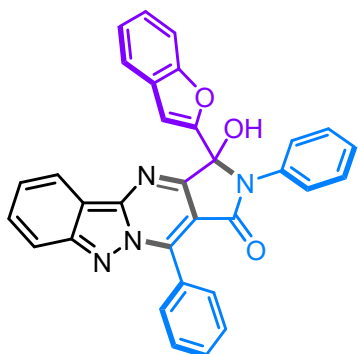

**(R)-3-(benzofuran-2-yl)-3-hydroxy-2,11-diphenyl-2,3-dihydro-1H-pyrrolo[3',4':4,5]pyrimido[1,2-b]indazol-1-one (5m):**

Yield 58%; 294 mg; orange solid; column chromatography, silica gel (PE:EA, 4:1); mp 223–225 °C. <sup>1</sup>H NMR (400 MHz, DMSO-*d*<sub>6</sub>) δ 8.40 (s, 1H), 8.27 (d, *J* = 8.4 Hz, 1H), 8.04–8.00 (m, 2H), 7.84 (d, *J* = 8.8 Hz, 1H), 7.70–7.64 (m, 5H), 7.48 (d, *J* = 7.6 Hz, 1H), 7.37–7.31 (m, 5H), 7.28–7.23 (m, 4H). <sup>13</sup>C NMR (100 MHz, DMSO-*d*<sub>6</sub>) δ 162.2, 159.6, 154.4, 152.9, 151.8, 145.1, 144.8, 135.0, 131.3, 131.2, 130.8, 128.8, 127.8, 127.5, 127.4, 127.1, 126.6, 125.1, 123.3, 122.0, 121.7, 120.9, 116.8, 112.7, 111.5, 110.9, 107.9, 87.8. HRMS (ESI): *m/z* [M+H]<sup>+</sup> calcd for C<sub>32</sub>H<sub>21</sub>N<sub>4</sub>O<sub>3</sub><sup>+</sup>: 509.1608; found: 509.1608.

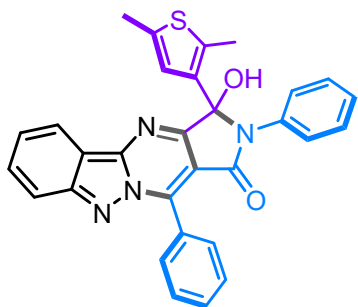

**(S)-3-(2,5-dimethylthiophen-3-yl)-3-hydroxy-2,11-diphenyl-2,3-dihydro-1H-pyrrolo[3',4':4,5]pyrimido[1,2-b]indazol-1-one (5n):**

Yield 60%; 301 mg; yellow solid; column chromatography, silica gel (PE:EA, 5:1); mp 197–199 °C. <sup>1</sup>H NMR (400 MHz, DMSO-*d*<sub>6</sub>) δ 8.33 (d, *J* = 8.4 Hz, 1H), 8.02–7.96 (m, 2H), 7.84 (d, *J* = 8.8 Hz, 1H), 7.78 (s, 1H), 7.70–7.64 (m, 4H), 7.45 (d, *J* = 8.0 Hz, 2H), 7.39–7.33 (m, 3H), 7.26 (t, *J* = 7.2 Hz, 1H), 6.76 (s, 1H), 2.27 (s, 3H), 2.16 (s, 3H). <sup>13</sup>C NMR (100 MHz, DMSO-*d*<sub>6</sub>) δ 161.8, 161.7, 151.8, 145.3, 144.4, 135.7, 134.0, 133.3, 131.2, 131.1, 130.7, 128.5, 127.7, 126.9, 126.8, 126.2, 121.7, 121.0, 116.7, 112.6, 111.2, 90.3, 14.7, 13.8. HRMS (ESI): *m/z* [M+H]<sup>+</sup> calcd for C<sub>30</sub>H<sub>23</sub>N<sub>4</sub>O<sub>2</sub>S<sup>+</sup>: 503.1536; found: 503.1537.

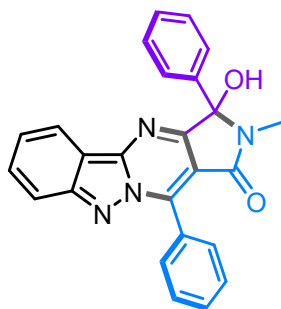

**3-hydroxy-2-methyl-3,11-diphenyl-2,3-dihydro-1H-pyrrolo[3',4':4,5]pyrimido[1,2-b]indazol-1-one (5o):**

Yield 73%; 296 mg; orange solid; column chromatography, silica gel (PE:EA, 5:1); mp 263–265 °C. <sup>1</sup>H NMR (400 MHz, DMSO-*d*<sub>6</sub>) δ 8.22 (d, *J* = 8.4 Hz, 1H), 7.98 (dd, *J* = 7.6, 1.6 Hz, 2H), 7.79 (d, *J* = 8.8 Hz, 1H), 7.69–7.64 (m, 3H), 7.63–7.57 (m, 3H), 7.47–7.42 (m, 3H), 7.40 (d, *J* = 7.2 Hz, 1H), 7.32–7.26 (m, 1H), 2.75 (s, 3H). <sup>13</sup>C NMR (100 MHz, DMSO-*d*<sub>6</sub>) δ 162.7, 162.3, 151.5, 144.7, 143.8, 137.7, 131.2, 131.0, 130.4, 128.6, 128.5, 127.7, 126.9, 126.7, 121.6, 120.7, 116.6, 112.5, 111.7, 88.8, 24.0. HRMS (ESI): *m/z* [M+H]<sup>+</sup> calcd for C<sub>25</sub>H<sub>19</sub>N<sub>4</sub>O<sub>2</sub><sup>+</sup>: 407.1503; found: 407.1505

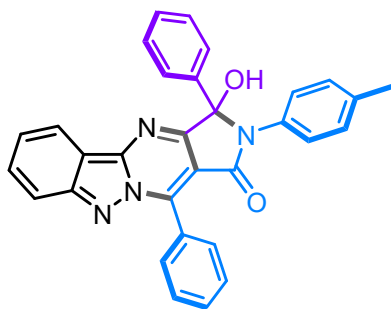

**(S)-3-hydroxy-3,11-diphenyl-2-(p-tolyl)-2,3-dihydro-1H-pyrrolo[3',4':4,5]pyrimido[1,2-b]indazol-1-one (5p):**

Yield 63%; 303 mg; orange solid; column chromatography, silica gel (PE:EA, 6:1); mp 256–258 °C. <sup>1</sup>H NMR (400 MHz, DMSO-*d*<sub>6</sub>) δ 8.24 (d, *J* = 8.4 Hz, 1H), 8.08-8.02 (m, 2H), 8.00 (s, 1H), 7.82 (d, *J* = 8.8 Hz, 1H), 7.74-7.63 (m, 4H), 7.63-7.58 (m, 2H), 7.37-7.27 (m, 6H), 7.09 (d, *J* = 8.4 Hz, 2H), 2.23 (s, 3H). <sup>13</sup>C NMR (100 MHz, DMSO-*d*<sub>6</sub>) δ 162.5, 162.3, 151.7, 145.2, 144.4, 138.2, 136.0, 132.9, 131.2, 131.0, 130.6, 128.9, 128.3, 128.2, 127.7, 127.0, 126.8, 126.6, 121.7, 120.8, 116.6, 112.5, 111.4, 90.7, 20.6. HRMS (ESI): *m/z* [M+H]<sup>+</sup> calcd for C<sub>31</sub>H<sub>23</sub>N<sub>4</sub>O<sub>2</sub><sup>+</sup>: 483.1816; found: 483.1816.

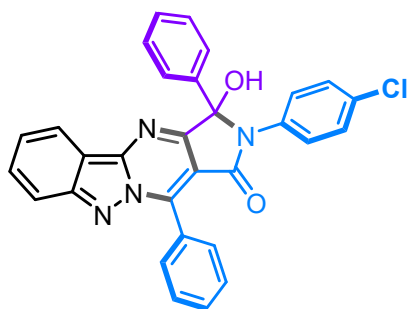

**(S)-2-(4-chlorophenyl)-3-hydroxy-3,11-diphenyl-2,3-dihydro-1H-pyrrolo[3',4':4,5]pyrimido[1,2-b]indazol-1-one (5q):**

Yield 60%; 301 mg; orange solid; column chromatography, silica gel (PE:EA, 5:1); mp 193–195 °C. <sup>1</sup>H NMR (400 MHz, DMSO-*d*<sub>6</sub>) δ 8.24 (d, *J* = 8.4 Hz, 1H), 8.14 (s, 1H), 8.06-8.01 (m, 2H), 7.82 (d, *J* = 8.8 Hz, 1H), 7.70-7.63 (m, 4H), 7.61 (d, *J* = 7.2 Hz, 2H), 7.50 (d, *J* = 8.8 Hz, 2H), 7.38-7.33 (m, 4H), 7.30 (d, *J* = 7.6 Hz, 2H). <sup>13</sup>C NMR (100 MHz, DMSO-*d*<sub>6</sub>) δ 162.3, 162.1, 151.8, 145.2, 144.6, 137.8, 134.7, 131.3, 131.2, 130.79, 130.77, 128.6, 128.5, 128.3, 127.8, 127.7, 127.0, 126.7, 121.8, 120.9, 116.7, 112.5, 111.0, 90.8. HRMS (ESI): *m/z* [M+H]<sup>+</sup> calcd for C<sub>30</sub>H<sub>20</sub>ClN<sub>4</sub>O<sub>2</sub><sup>+</sup>: 503.1269; found: 503.1269.

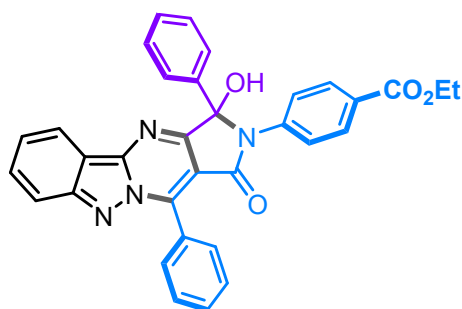

**ethyl(S)-4-(3-hydroxy-1-oxo-3,11-diphenyl-1H-pyrrolo[3',4':4,5]pyrimido[1,2-b]indazol-2(3H)-yl)benzoate (5r):**

Yield 58%; 313 mg; orange solid; column chromatography, silica gel (PE:EA, 5:1); mp 184–186 °C. <sup>1</sup>H NMR (400 MHz, DMSO-*d*<sub>6</sub>) δ 8.25 (s, 1H), 8.23 (s, 1H), 8.06-8.03 (m, 2H), 7.89-7.80 (m, 4H), 7.77 (d, *J* = 8.8 Hz, 2H), 7.69 (d, *J* = 6.8 Hz, 3H), 7.64 (d, *J* = 7.2 Hz, 2H), 7.34 (t, *J* = 7.2 Hz, 3H), 7.29 (d, *J* = 8.8 Hz, 1H), 4.26 (d, *J* = 7.2 Hz, 2H), 1.28 (t, *J* = 7.2 Hz, 3H). <sup>13</sup>C NMR (100 MHz, DMSO-*d*<sub>6</sub>) δ 165.1, 162.4, 161.8, 151.8, 145.3, 144.8, 140.4, 137.8, 131.2, 130.8, 129.5, 129.3, 128.5, 128.3, 127.7, 126.9, 126.7, 124.7, 121.8, 120.8,

116.6, 112.5, 110.8, 91.2, 60.6, 14.1. HRMS (ESI):  $m/z$   $[M+H]^+$  calcd for  $C_{33}H_{25}N_4O_4^+$ : 541.1870; found: 541.1870.

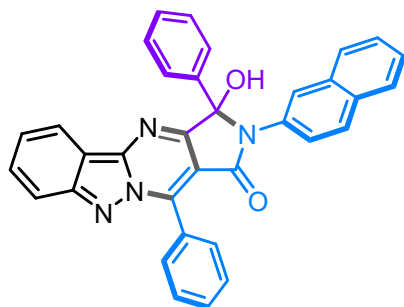

**(S)-3-hydroxy-2-(naphthalen-2-yl)-3,11-diphenyl-2,3-dihydro-1H-pyrrolo[3',4':4,5]pyrimido[1,2-b]indazol-1-one (5s):**

Yield 55%; 284 mg; orange solid; column chromatography, silica gel (PE:EA, 5:1); mp 227–229 °C.  $^1H$  NMR (400 MHz,  $DMSO-d_6$ )  $\delta$  8.26 (d,  $J = 8.4$  Hz, 1H), 8.24 (s, 1H), 8.08 (d,  $J = 7.6$  Hz, 3H), 7.83 (t,  $J = 8.0$  Hz, 4H), 7.71–7.62 (m, 7H), 7.47 (dd,  $J = 6.0, 3.2$  Hz, 2H), 7.32 (t,  $J = 7.6$  Hz, 3H), 7.24 (t,  $J = 7.2$  Hz, 1H).  $^{13}C$  NMR (100 MHz,  $DMSO-d_6$ )  $\delta$  162.6, 162.4, 151.8, 145.3, 144.6, 138.1, 133.5, 132.7, 131.3, 131.1, 130.7, 128.4, 128.3, 127.82, 127.77, 127.4, 127.1, 126.9, 126.4, 126.2, 124.9, 124.2, 121.8, 120.9, 116.7, 112.6, 111.3, 91.1. HRMS (ESI):  $m/z$   $[M+H]^+$  calcd for  $C_{34}H_{23}N_4O_2^+$ : 519.1816; found: 519.1816.

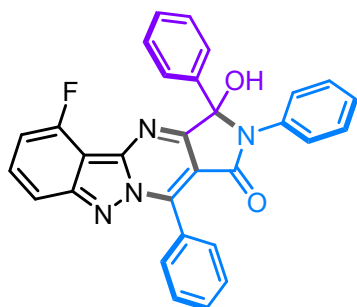

**(S)-5-fluoro-3-hydroxy-2,3,11-triphenyl-2,3-dihydro-1H-pyrrolo[3',4':4,5]pyrimido[1,2-b]indazol-1-one (5t):**

Yield 62%; 301 mg; orange solid; column chromatography, silica gel (PE:EA, 5:1); mp 208–210 °C.  $^1H$  NMR (400 MHz,  $DMSO-d_6$ )  $\delta$  8.10 (s, 1H), 8.05 (d,  $J = 6.8$  Hz, 2H), 7.71–7.66 (m, 3H), 7.65–7.58 (m, 4H), 7.43 (d,  $J = 7.6$  Hz, 2H), 7.37–7.28 (m, 5H), 7.20 (t,  $J = 7.2$  Hz, 1H), 7.09–7.03 (m, 1H).  $^{13}C$  NMR (100 MHz,  $DMSO-d_6$ )  $\delta$  163.5, 162.1, 156.0 (d,  $J = 255.0$  Hz,  $^1J_{CF}$ ), 153.2 (d,  $J = 4.0$  Hz,  $^4J_{CF}$ ), 144.7, 143.6 (d,  $J = 6.0$  Hz,  $^3J_{CF}$ ), 138.0, 135.5, 131.3, 128.5, 128.4, 128.3, 127.7, 127.0, 126.8, 126.7, 126.6, 113.0, 111.6, 105.1 (d,  $J = 17.0$  Hz,  $^2J_{CF}$ ), 103.1 (d,  $J = 18.0$  Hz,  $^2J_{CF}$ ), 90.9.  $^{19}F$  NMR (376 MHz,  $DMSO-d_6$ )  $\delta$  -115.53. HRMS (ESI):  $m/z$   $[M+H]^+$  calcd for  $C_{30}H_{20}FN_4O_2^+$ : 487.1565; found: 487.1568.

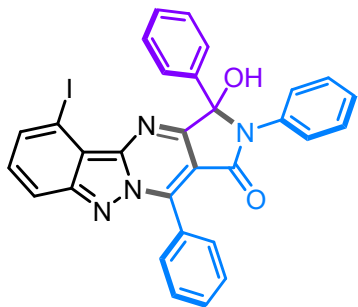

**(S)-3-hydroxy-5-iodo-2,3,11-triphenyl-2,3-dihydro-1H-pyrrolo[3',4':4,5]pyrimido[1,2-b]indazol-1-one (5u):**

Yield 58%; 344 mg; orange solid; column chromatography, silica gel (PE:EA, 6:1); mp 240–242 °C. <sup>1</sup>H NMR (400 MHz, DMSO-*d*<sub>6</sub>) δ 8.06 (s, 1H), 7.99 (dd, *J* = 7.6, 2.0 Hz, 2H), 7.83 (t, *J* = 8.0 Hz, 2H), 7.69–7.63 (m, 5H), 7.51 (d, *J* = 7.6 Hz, 2H), 7.38–7.35 (m, 1H), 7.34–7.28 (m, 5H), 7.20 (t, *J* = 7.6 Hz, 1H). <sup>13</sup>C NMR (100 MHz, DMSO-*d*<sub>6</sub>) δ 162.3, 161.7, 152.1, 145.4, 144.6, 138.0, 135.8, 132.3, 131.5, 131.2, 131.1, 128.44, 128.39, 128.2, 127.7, 127.0, 126.7, 126.5, 126.3, 116.5, 113.8, 111.7, 91.2, 86.0. HRMS (ESI): *m/z* [M+H]<sup>+</sup> calcd for C<sub>30</sub>H<sub>20</sub>IN<sub>4</sub>O<sub>2</sub><sup>+</sup>: 595.0625; found: 595.0625.

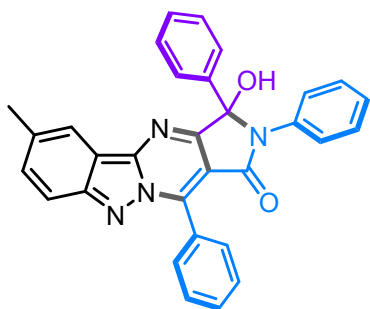

**(S)-3-hydroxy-6-methyl-2,3,11-triphenyl-2,3-dihydro-1H-pyrrolo[3',4':4,5]pyrimido[1,2-b]indazol-1-one (5v):**

Yield 70%; 337 mg; orange solid; column chromatography, silica gel (PE:EA, 5:1); mp 238–240 °C. <sup>1</sup>H NMR (400 MHz, DMSO-*d*<sub>6</sub>) δ 8.06 (d, *J* = 1.6 Hz, 1H), 8.05–8.01 (m, 3H), 7.74 (d, *J* = 8.8 Hz, 1H), 7.70–7.62 (m, 5H), 7.51–7.44 (m, 3H), 7.37–7.27 (m, 5H), 7.19 (t, *J* = 7.6 Hz, 1H), 2.46 (s, 3H). <sup>13</sup>C NMR (100 MHz, DMSO-*d*<sub>6</sub>) δ 162.4, 162.0, 150.7, 144.5, 144.3, 138.3, 135.7, 133.3, 131.2, 131.1, 131.0, 128.4, 128.2, 127.7, 127.0, 126.9, 126.6, 118.9, 116.4, 112.7, 110.9, 90.8, 21.2. HRMS (ESI): *m/z* [M+H]<sup>+</sup> calcd for C<sub>31</sub>H<sub>23</sub>N<sub>4</sub>O<sub>2</sub><sup>+</sup>: 483.1816; found: 483.1816.

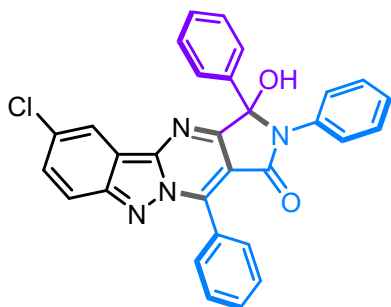

**(S)-6-chloro-3-hydroxy-2,3,11-triphenyl-2,3-dihydro-1H-pyrrolo[3',4':4,5]pyrimido[1,2-b]indazol-1-one (5w):**

Yield 60%; 301 mg; orange solid; column chromatography, silica gel (PE:EA, 5:1); mp 267–269 °C. <sup>1</sup>H NMR (400 MHz, DMSO-*d*<sub>6</sub>) δ 8.29 (d, *J* = 1.6 Hz, 1H), 8.06 (s, 1H), 8.02 (dd, *J* = 7.6, 1.6 Hz, 2H), 7.87 (d, *J* = 9.2 Hz, 1H), 7.70-7.66 (m, 3H), 7.63 (d, *J* = 2.0 Hz, 1H), 7.61 (d, *J* = 1.6 Hz, 1H), 7.59 (s, 1H), 7.41 (d, *J* = 1.2 Hz, 1H), 7.39 (s, 1H), 7.35-7.27 (m, 5H), 7.19 (t, *J* = 7.2 Hz, 1H). <sup>13</sup>C NMR (100 MHz, DMSO-*d*<sub>6</sub>) δ 163.1, 162.1, 149.9, 144.9, 144.6, 138.0, 135.5, 131.4, 131.2, 128.44, 128.40, 128.2, 127.7, 127.0, 126.8, 126.7, 126.5, 126.0, 124.5, 119.6, 118.8, 113.0, 111.8, 90.8. HRMS (ESI): *m/z* [M+H]<sup>+</sup> calcd for C<sub>30</sub>H<sub>20</sub>ClN<sub>4</sub>O<sub>2</sub><sup>+</sup>: 503.1269; found: 503.1266.

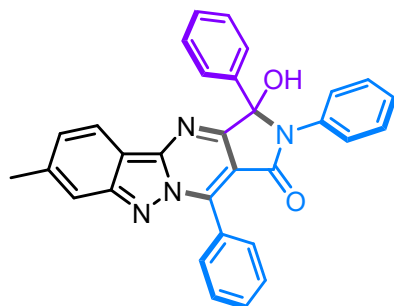

**(S)-3-hydroxy-7-methyl-2,3,11-triphenyl-2,3-dihydro-1H-pyrrolo[3',4':4,5]pyrimido[1,2-b]indazol-1-one (5x):**

Yield 60%; 289 mg; orange solid; column chromatography, silica gel (PE:EA, 6:1); mp 196–198 °C. <sup>1</sup>H NMR (400 MHz, DMSO-*d*<sub>6</sub>) δ 8.12 (d, *J* = 8.4 Hz, 1H), 8.04-7.99 (m, 3H), 7.67 (q, *J* = 5.6 Hz, 3H), 7.60 (d, *J* = 8.0 Hz, 3H), 7.41 (d, *J* = 8.0 Hz, 2H), 7.35-7.26 (m, 5H), 7.20-7.14 (m, 2H), 2.50 (s, 3H). <sup>13</sup>C NMR (100 MHz, DMSO-*d*<sub>6</sub>) δ 162.4, 152.5, 145.1, 144.4, 140.9, 138.2, 135.7, 131.2, 131.1, 128.4, 128.2, 127.7, 127.0, 126.8, 126.6, 124.5, 120.4, 115.1, 110.8, 110.7, 90.7, 22.2. HRMS (ESI): *m/z* [M+H]<sup>+</sup> calcd for C<sub>31</sub>H<sub>23</sub>N<sub>4</sub>O<sub>2</sub><sup>+</sup>: 483.1816; found: 483.1816.

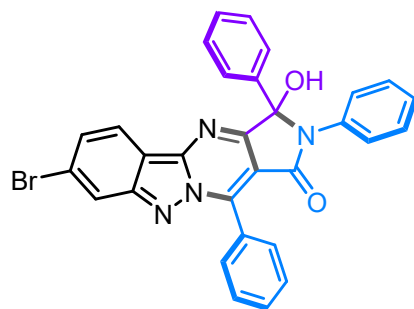

**(S)-7-bromo-3-hydroxy-2,3,11-triphenyl-2,3-dihydro-1H-pyrrolo[3',4':4,5]pyrimido[1,2-b]indazol-1-one (5y):**

Yield 57%; 311 mg; yellow solid; column chromatography, silica gel (PE:EA, 6:1); mp 186–188 °C. <sup>1</sup>H NMR (400 MHz, DMSO-*d*<sub>6</sub>) δ 8.21 (d, *J* = 8.8 Hz, 1H), 8.13 (d, *J* = 0.8 Hz, 1H), 8.08 (s, 1H), 8.06-8.01 (m, 2H), 7.71-7.65 (m, 3H), 7.63-7.60 (m, 2H), 7.42 (d, *J* = 7.6 Hz, 2H), 7.39 (dd, *J* = 8.8, 1.6 Hz, 1H), 7.35 (d, *J* = 6.8 Hz, 1H), 7.33-7.26 (m, 4H), 7.19 (t, *J* = 7.6 Hz, 1H). <sup>13</sup>C NMR (100 MHz, DMSO-*d*<sub>6</sub>) δ 163.5, 162.1, 152.2, 145.4, 145.0, 137.9,



135.5, 131.2, 128.5, 128.4, 128.3, 127.8, 127.0, 126.8, 126.7, 126.6, 124.9, 124.2, 122.9, 118.8, 111.8, 111.3, 90.8. HRMS (ESI):  $m/z$   $[M+H]^+$  calcd for  $C_{30}H_{20}BrN_4O_2^+$ : 547.0764; found: 547.0764.

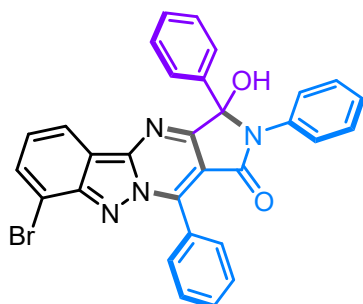

**(S)-8-bromo-3-hydroxy-2,3,11-triphenyl-2,3-dihydro-1H-pyrrolo[3',4':4,5]pyrimido[1,2-b]indazol-1-one (5z):**

Yield 63%; 344 mg; orange solid; column chromatography, silica gel (PE:EA, 6:1); mp 190–192 °C.  $^1H$  NMR (400 MHz,  $DMSO-d_6$ )  $\delta$  8.27 (d,  $J = 8.4$  Hz, 1H), 8.11 (s, 3H), 7.93 (d,  $J = 7.2$  Hz, 1H), 7.70 (d,  $J = 6.4$  Hz, 3H), 7.64 (d,  $J = 7.2$  Hz, 2H), 7.44 (d,  $J = 7.6$  Hz, 2H), 7.37–7.28 (m, 5H), 7.23–7.18 (m, 2H).  $^{13}C$  NMR (100 MHz,  $DMSO-d_6$ )  $\delta$  163.6, 162.1, 149.7, 146.0, 145.2, 137.9, 135.5, 133.3, 131.5, 131.4, 128.5, 128.4, 128.3, 127.7, 127.0, 126.8, 126.7, 126.3, 122.4, 120.6, 113.8, 112.0, 109.5, 90.7. HRMS (ESI):  $m/z$   $[M+H]^+$  calcd for  $C_{30}H_{20}BrN_4O_2^+$ : 547.0764; found: 547.0764.

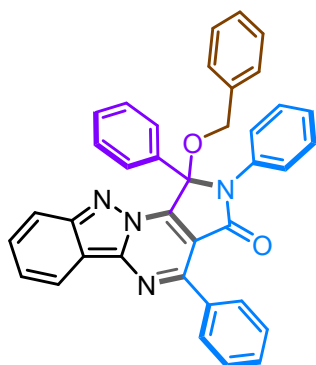

**(S)-1-(benzyloxy)-1,2,4-triphenyl-1,2-dihydro-3H-pyrrolo[3',4':5,6]pyrimido[1,2-b]indazol-3-one (7):**

Yield 93%; 155 mg; yellow solid; column chromatography, silica gel (PE:EA, 20:1); mp 211–213 °C.  $^1H$  NMR (400 MHz,  $CDCl_3$ )  $\delta$  8.50 (d,  $J = 8.4$  Hz, 1H), 8.45 (d,  $J = 7.6$  Hz, 2H), 8.01 (d,  $J = 8.8$  Hz, 1H), 7.88 (d,  $J = 7.6$  Hz, 2H), 7.77–7.67 (m, 6H), 7.44–7.36 (m, 8H), 7.31–7.29 (m, 1H), 7.27–7.23 (m, 3H), 4.97 (d,  $J = 10.8$  Hz, 1H), 4.39 (d,  $J = 10.8$  Hz, 1H).  $^{13}C$  NMR (100 MHz,  $CDCl_3$ )  $\delta$  164.0, 154.0, 150.5, 149.3, 144.8, 135.3, 134.9, 133.7, 130.7, 130.5, 130.3, 129.3, 128.7, 128.3, 128.04, 127.99, 127.9, 127.1, 126.5, 124.9, 122.0, 121.1, 117.3, 113.7, 112.1, 93.8, 66.8. HRMS (ESI):  $m/z$   $[M+H]^+$  calcd for  $C_{37}H_{27}N_4O_2^+$ : 559.2129; found: 559.2127.

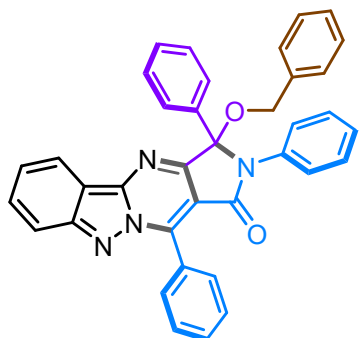

**(S)-3-(benzyloxy)-2,3,11-triphenyl-2,3-dihydro-1H-pyrrolo[3',4':4,5]pyrimido[1,2-b]indazol-1-one (8):**

Yield 82%; 137 mg; orange solid; column chromatography, silica gel (PE:EA, 15:1); mp 190–192 °C. <sup>1</sup>H NMR (400 MHz, CDCl<sub>3</sub>) δ 8.30 (d, *J* = 8.4 Hz, 1H), 8.11 (dd, *J* = 6.4, 2.8 Hz, 2H), 7.83 (d, *J* = 8.8 Hz, 1H), 7.70-7.67 (m, 3H), 7.63 (t, *J* = 8.0 Hz, 3H), 7.57 (d, *J* = 8.4 Hz, 2H), 7.36-7.32 (m, 4H), 7.30 (d, *J* = 9.2 Hz, 4H), 7.26 (d, *J* = 4.4 Hz, 1H), 7.23 (d, *J* = 7.6 Hz, 4H), 7.14 (t, *J* = 7.2 Hz, 1H), 4.73 (d, *J* = 10.8 Hz, 1H), 4.46 (d, *J* = 10.8 Hz, 1H). <sup>13</sup>C NMR (100 MHz, CDCl<sub>3</sub>) δ 163.5, 158.3, 152.9, 146.2, 145.1, 137.2, 136.5, 135.6, 132.0, 131.3, 130.9, 128.9, 128.7, 128.6, 128.3, 128.1, 127.9, 127.8, 126.8, 126.4, 126.1, 124.7, 121.9, 121.5, 117.0, 113.5, 111.0, 95.2, 65.8. HRMS (ESI): *m/z* [M+H]<sup>+</sup> calcd for C<sub>37</sub>H<sub>27</sub>N<sub>4</sub>O<sub>2</sub><sup>+</sup>: 559.2129; found: 559.2129.

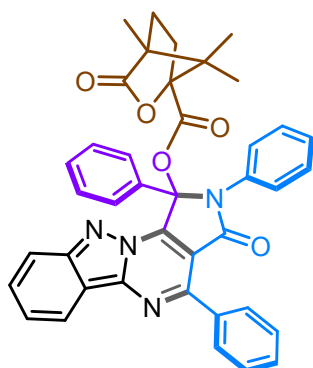

**(S)-3-oxo-1,2,4-triphenyl-2,3-dihydro-1H-pyrrolo[3',4':5,6]pyrimido[1,2-b]indazol-1-yl (1R,4S)-4,7,7-trimethyl-3-oxo-2-oxabicyclo[2.2.1]heptane-1-carboxylate (9):**

Yield 90%; 175 mg; yellow solid; column chromatography, silica gel (PE:EA, 10:1); mp 226–228 °C. <sup>1</sup>H NMR (400 MHz, CDCl<sub>3</sub>) δ 8.38 (d, *J* = 8.4 Hz, 1H), 8.29 (d, *J* = 6.4 Hz, 2H), 7.86-7.80 (m, 2H), 7.77-7.72 (m, 1H), 7.61-7.55 (m, 4H), 7.41 (d, *J* = 8.0 Hz, 2H), 7.32-7.27 (m, 3H), 7.25-7.18 (m, 4H), 2.58-2.39 (m, 1H), 1.94-1.83 (m, 2H), 1.68-1.61 (m, 1H), 1.06 (d, *J* = 4.0 Hz, 3H), 0.93 (s, 3H), 0.74 (s, 3H). <sup>13</sup>C NMR (100 MHz, CDCl<sub>3</sub>) δ 177.7, 165.2, 164.3, 154.0, 151.4, 150.3, 144.8, 135.2, 133.8, 132.3, 131.0, 130.5, 130.4, 130.3, 130.2, 129.1, 129.0, 128.1, 127.6, 126.8, 126.1, 121.9, 121.5, 116.8, 113.7, 110.9, 90.7, 55.0, 54.6, 31.3, 28.6, 16.3, 16.2, 9.6. HRMS (ESI): *m/z* [M+H]<sup>+</sup> calcd for C<sub>40</sub>H<sub>33</sub>N<sub>4</sub>O<sub>5</sub><sup>+</sup>: 649.2445; found: 649.2448.

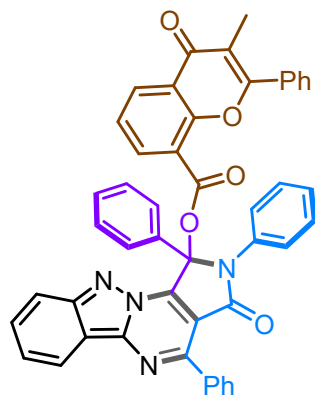

**(S)-3-oxo-1,2,4-triphenyl-2,3-dihydro-1H-pyrrolo[3',4':5,6]pyrimido[1,2-b]indazol-1-yl 3-methyl-4-oxo-2-phenyl-4H-chromene-8-carboxylate (10):**

Yield 88%; 192 mg; orange solid; column chromatography, silica gel (PE:EA, 10:1); mp 238–240 °C. <sup>1</sup>H NMR (400 MHz, CDCl<sub>3</sub>) δ 8.48 (dd, *J* = 12.4, 8.0 Hz, 4H), 8.24–8.19 (m, 1H), 7.90 (d, *J* = 7.6 Hz, 2H), 7.81 (d, *J* = 8.8 Hz, 1H), 7.70–7.63 (m, 3H), 7.60–7.51 (m, 3H), 7.40–7.35 (m, 3H), 7.33–7.28 (m, 8H), 7.22 (t, *J* = 7.6 Hz, 2H), 2.24 (s, 3H). <sup>13</sup>C NMR (100 MHz, CDCl<sub>3</sub>) δ 177.4, 164.5, 161.8, 160.8, 154.0, 153.9, 151.2, 150.8, 144.7, 136.2, 135.2, 133.5, 132.0, 131.9, 131.4, 130.7, 130.5, 130.21, 130.16, 129.7, 129.0, 128.9, 128.4, 127.9, 127.8, 127.5, 126.8, 123.9, 123.0, 121.6, 121.2, 118.7, 117.6, 116.7, 113.5, 111.2, 91.4, 11.6. HRMS (ESI): *m/z* [M+H]<sup>+</sup> calcd for C<sub>47</sub>H<sub>31</sub>N<sub>4</sub>O<sub>5</sub><sup>+</sup>: 731.2289; found: 731.2293.

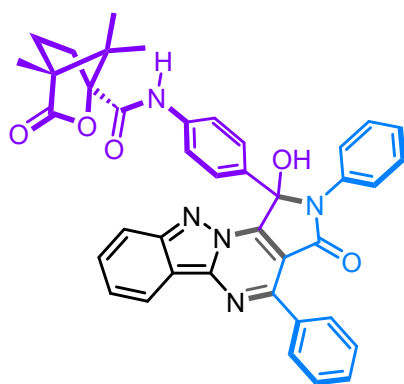

**(4S)-N-(4-((S)-1-hydroxy-3-oxo-2,4-diphenyl-2,3-dihydro-1H-pyrrolo[3',4':5,6]pyrimido[1,2-b]indazol-1-yl)phenyl)-4,7,7-trimethyl-3-oxo-2-oxabicyclo[2.2.1]heptane-1-carboxamide (12):**

Yield 69%; 457 mg; yellow solid; column chromatography, silica gel (PE:EA, 5:1); mp 265–267 °C. <sup>1</sup>H NMR (400 MHz, DMSO-*d*<sub>6</sub>) δ 9.84 (s, 1H), 8.37 (d, *J* = 8.4 Hz, 1H), 8.32 (s, 1H), 8.25–8.23 (m, 2H), 7.86 (d, *J* = 8.8 Hz, 1H), 7.74–7.67 (m, 6H), 7.62–7.60 (m, 2H), 7.46 (d, *J* = 8.0 Hz, 2H), 7.39–7.33 (m, 3H), 7.24 (d, *J* = 7.2 Hz, 1H), 2.01–1.95 (m, 1H), 1.93–1.85 (m, 1H), 1.59–1.53 (m, 1H), 1.27–1.19 (m, 1H), 1.01 (s, 3H), 1.00 (s, 3H), 0.88–0.85 (m, 3H). <sup>13</sup>C NMR (100 MHz, DMSO-*d*<sub>6</sub>) δ 177.8, 165.4, 162.9, 152.9, 152.3, 150.8, 144.4, 138.3, 135.5, 135.1, 131.0, 130.6, 130.1, 128.5, 127.8, 127.6, 127.1, 126.8, 122.0, 121.0, 120.4, 120.3, 116.9, 112.9, 111.8, 91.7, 89.2, 54.6, 53.6, 30.1, 28.4, 16.5, 16.3, 9.5. HRMS (ESI): *m/z* [M+H]<sup>+</sup> calcd for C<sub>40</sub>H<sub>34</sub>N<sub>5</sub>O<sub>5</sub><sup>+</sup>: 664.2554; found: 664.2553.

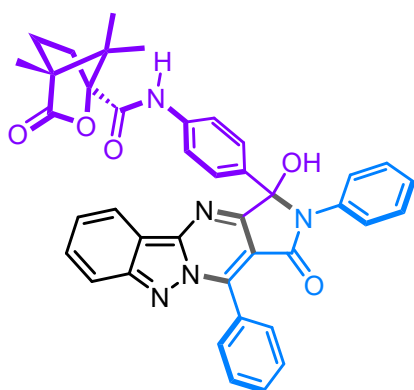

**(4S)-N-(4-((S)-3-hydroxy-1-oxo-2,11-diphenyl-2,3-dihydro-1H-pyrrolo[3',4':4,5]pyrimido[1,2-b]indazol-3-yl)phenyl)-4,7,7-trimethyl-3-oxo-2-oxabicyclo[2.2.1]heptane-1-carboxamide (13):**

Yield 60%; 397 mg; yellow solid; column chromatography, silica gel (PE:EA, 4:1); mp 211–213 °C. <sup>1</sup>H NMR (400 MHz, DMSO-*d*<sub>6</sub>) δ 9.84 (s, 1H), 8.24 (d, *J* = 8.4 Hz, 1H), 8.04 (dd, *J* = 7.6, 2.0 Hz, 2H), 8.01 (s, 1H), 7.82 (d, *J* = 8.8 Hz, 1H), 7.71-7.64 (m, 6H), 7.56 (d, *J* = 8.8 Hz, 2H), 7.46 (dd, *J* = 8.4, 1.2 Hz, 2H), 7.34-7.27 (m, 3H), 7.19 (t, *J* = 7.6 Hz, 1H), 2.01-1.95 (m, 1H), 1.92-1.84 (m, 1H), 1.60-1.54 (m, 1H), 1.23 (s, 1H), 1.02 (s, 3H), 1.01 (s, 3H), 0.87 (s, 3H). <sup>13</sup>C NMR (100 MHz, DMSO-*d*<sub>6</sub>) δ 177.9, 165.4, 162.4, 162.3, 151.7, 145.2, 144.4, 139.1, 137.8, 135.7, 133.7, 131.2, 131.1, 130.7, 128.4, 127.7, 127.3, 126.8, 126.5, 121.7, 120.8, 120.5, 116.6, 112.5, 111.2, 91.8, 90.7, 54.6, 53.6, 30.0, 28.4, 16.5, 16.3, 9.5. HRMS (ESI): *m/z* [M+H]<sup>+</sup> calcd for C<sub>40</sub>H<sub>34</sub>N<sub>5</sub>O<sub>5</sub><sup>+</sup>: 664.2554; found: 664.2551.

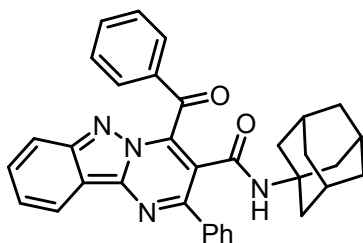

**N-((3R,5R)-adamantan-1-yl)-4-benzoyl-2-phenylpyrimido[1,2-b]indazole-3-carboxamide (14):**

Yield 68%; 357 mg; yellow solid; column chromatography, silica gel (PE:EA, 8:1); mp 292–294 °C. <sup>1</sup>H NMR (400 MHz, DMSO-*d*<sub>6</sub>) δ 8.36 (d, *J* = 8.4 Hz, 1H), 7.96 (d, *J* = 6.0 Hz, 5H), 7.77 (t, *J* = 8.0 Hz, 2H), 7.68-7.63 (m, 1H), 7.60-7.54 (m, 5H), 7.37 (t, *J* = 7.6 Hz, 1H), 1.86 (s, 3H), 1.61-1.50 (m, 9H), 1.43 (d, *J* = 11.6 Hz, 3H). <sup>13</sup>C NMR (100 MHz, DMSO-*d*<sub>6</sub>) δ 187.5, 162.3, 152.5, 151.6, 142.4, 139.6, 137.5, 135.3, 134.3, 130.4, 129.9, 129.7, 129.2, 129.0, 128.2, 121.5, 120.9, 120.7, 116.3, 112.5, 51.9, 35.8, 28.5. HRMS (ESI): *m/z* [M+H]<sup>+</sup> calcd for C<sub>34</sub>H<sub>31</sub>N<sub>4</sub>O<sub>2</sub><sup>+</sup>: 527.2442; found: 527.2434.

## 7. Crystallographic data and molecular structure of **4b** and **5i**

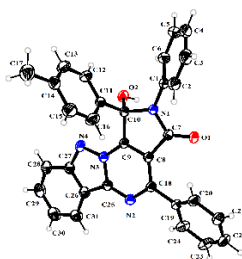

**Figure 1.** Molecular structure of **4b** with 30% probability ellipsoids

Crystal Data for Compound **4b**: CCDC 2367465 contains the supplementary crystallographic data for this paper. These data can be obtained free of charge from The Cambridge Crystallographic.

Sample preparation: In a 10 mL glass bottle, 15 mg of pure **4b** or **5i** was completely dissolved in the mixed solvent of 3 mL EtOAc, 1 mL EtOH, 1 mL CHCl<sub>3</sub>; and then 2 mL of n-hexane was added slowly. After a week of solvent evaporation, some colorless transparent crystals were obtained. The crystals were mounted on a glass fiber for diffraction experiments. Intensity data were collected on a Bruker SMART APEX CCD diffractometer with Mo K $\alpha$  radiation (0.71073 Å) at room temperature.

|                                                               |                |                     |              |
|---------------------------------------------------------------|----------------|---------------------|--------------|
| Bond precision:                                               | C-C = 0.0028 Å | Wavelength=0.71073  |              |
| Cell:                                                         | a=18.947 (3)   | b=16.244 (3)        | c=15.993 (3) |
|                                                               | alpha=90       | beta=104.238 (2)    | gamma=90     |
| Temperature:                                                  | 296 K          |                     |              |
|                                                               | Calculated     | Reported            |              |
| Volume                                                        | 4771.1 (15)    | 4771.1 (13)         |              |
| Space group                                                   | C 2/c          | C 1 2/c 1           |              |
| Hall group                                                    | -C 2yc         | -C 2yc              |              |
| Moiety formula                                                | C31 H22 N4 O2  | C31 H22 N4 O2       |              |
| Sum formula                                                   | C31 H22 N4 O2  | C31 H22 N4 O2       |              |
| Mr                                                            | 482.53         | 482.52              |              |
| Dx, g cm <sup>-3</sup>                                        | 1.344          | 1.344               |              |
| Z                                                             | 8              | 8                   |              |
| Mu (mm <sup>-1</sup> )                                        | 0.086          | 0.086               |              |
| F000                                                          | 2016.0         | 2016.0              |              |
| F000'                                                         | 2016.79        |                     |              |
| h, k, lmax                                                    | 23, 20, 20     | 23, 20, 20          |              |
| Nref                                                          | 4933           | 4920                |              |
| Tmin, Tmax                                                    | 0.980, 0.991   | 0.681, 0.745        |              |
| Tmin'                                                         | 0.975          |                     |              |
| Correction method= # Reported T Limits: Tmin=0.681 Tmax=0.745 |                |                     |              |
| AbsCorr = MULTI-SCAN                                          |                |                     |              |
| Data completeness=                                            | 0.997          | Theta (max)= 26.475 |              |
| R(reflections)=                                               | 0.0444 ( 3773) | wR2(reflections)=   |              |
|                                                               |                | 0.1456 ( 4920)      |              |
| S =                                                           | 1.026          | Npar= 337           |              |

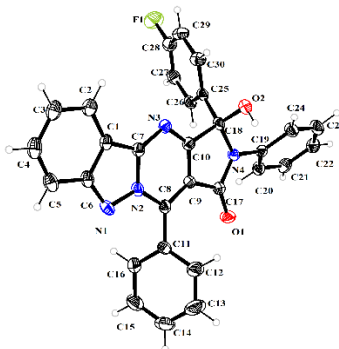

**Figure 2.** Molecular structure of **5i** with 30% probability ellipsoids

Crystal Data for Compound **5i**: CCDC 2367548 contains the supplementary crystallographic data for this paper. These data can be obtained free of charge from The Cambridge Crystallographic.

Bond precision: C-C = 0.0056 Å Wavelength=0.71073

Cell: a=12.761 (2) b=11.663 (2) c=19.570 (3)  
 alpha=90 beta=107.371 (3) gamma=90

Temperature: 296 K

|                        | Calculated                 | Reported                   |
|------------------------|----------------------------|----------------------------|
| Volume                 | 2779.8 (8)                 | 2779.6 (8)                 |
| Space group            | P 21/n                     | P 1 21/n 1                 |
| Hall group             | -P 2yn                     | -P 2yn                     |
| Moiety formula         | C30 H20 F N4 O2, C2 H6 O S | C30 H20 F N4 O2, C2 H6 O S |
| Sum formula            | C32 H26 F N4 O3 S          | C32 H26 F N4 O3 S          |
| Mr                     | 565.63                     | 565.63                     |
| Dx, g cm <sup>-3</sup> | 1.352                      | 1.352                      |
| Z                      | 4                          | 4                          |
| Mu (mm <sup>-1</sup> ) | 0.165                      | 0.165                      |
| F000                   | 1180.0                     | 1180.0                     |
| F000'                  | 1181.01                    |                            |
| h, k, lmax             | 15, 13, 23                 | 15, 13, 23                 |
| Nref                   | 4912                       | 4899                       |
| Tmin, Tmax             | 0.961, 0.984               | 0.671, 0.745               |
| Tmin'                  | 0.949                      |                            |

Correction method= # Reported T Limits: Tmin=0.671 Tmax=0.745

AbsCorr = MULTI-SCAN

Data completeness= 0.997

Theta (max)= 24.999

R(reflections)= 0.0702 ( 3049)

wR2 (reflections)=  
0.1845 ( 4899)

S = 1.040

Npar= 387

## 8. $^1\text{H}$ , $^{13}\text{C}$ and $^{19}\text{F}$ NMR spectra of compounds

**4a**

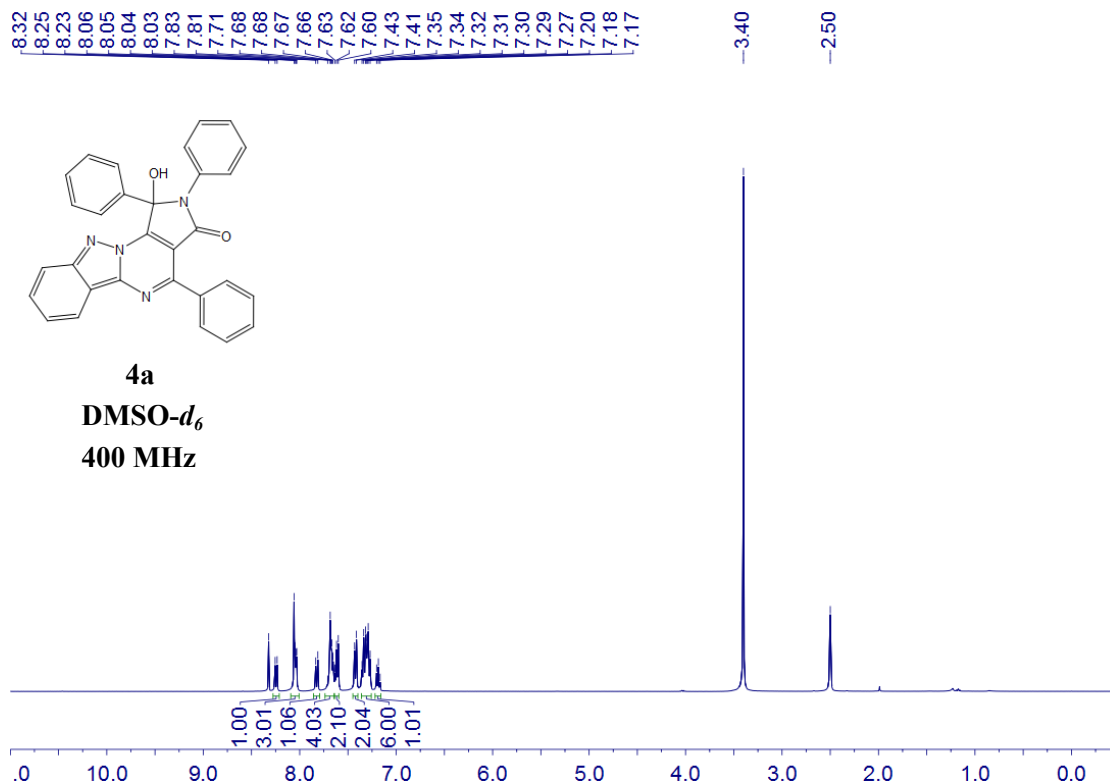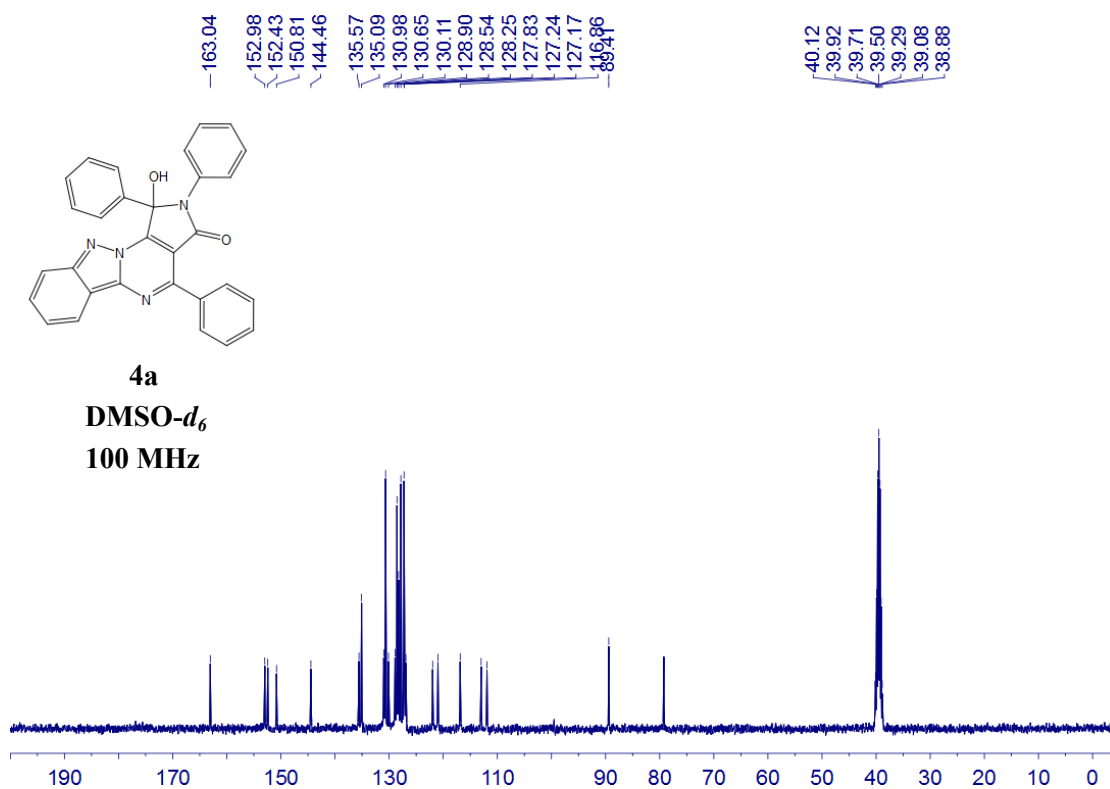

**4b**

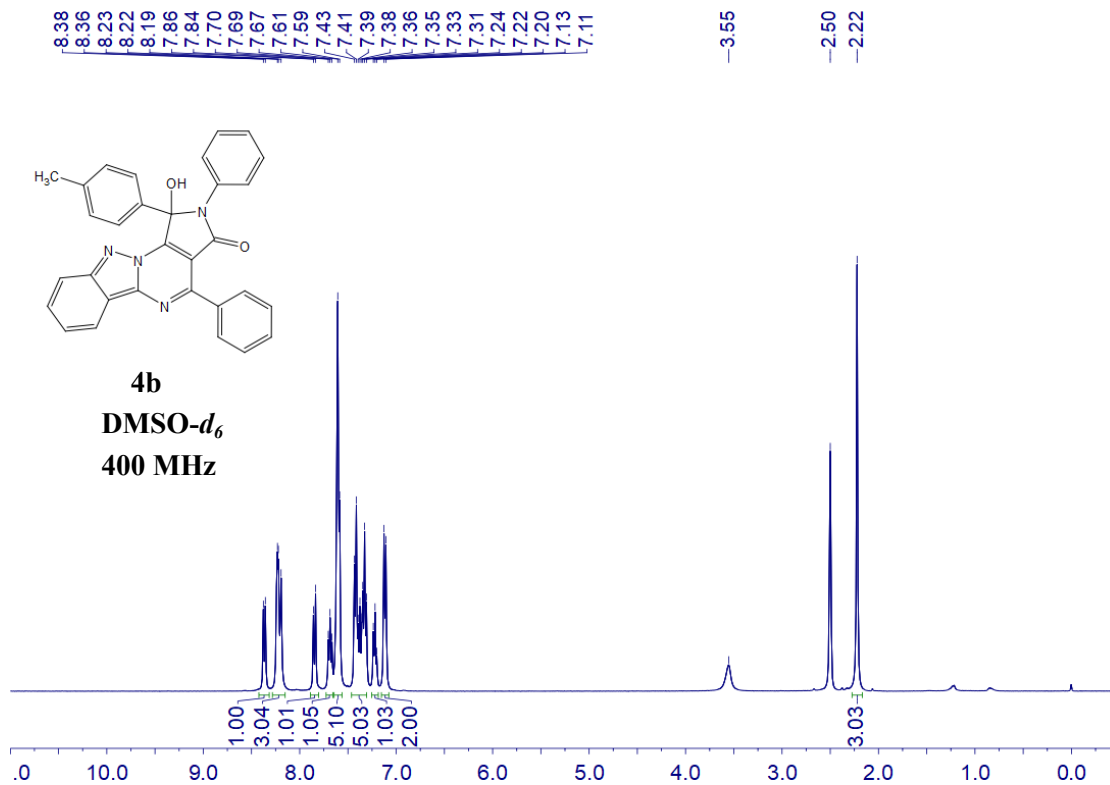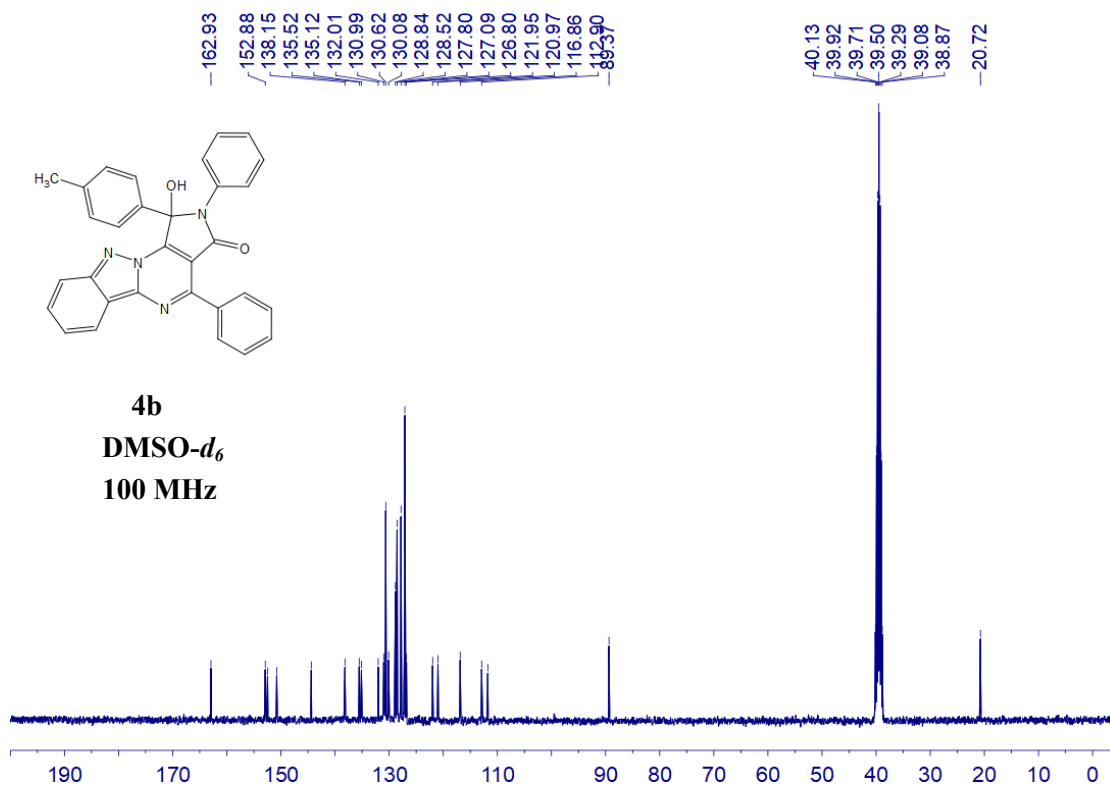



4c

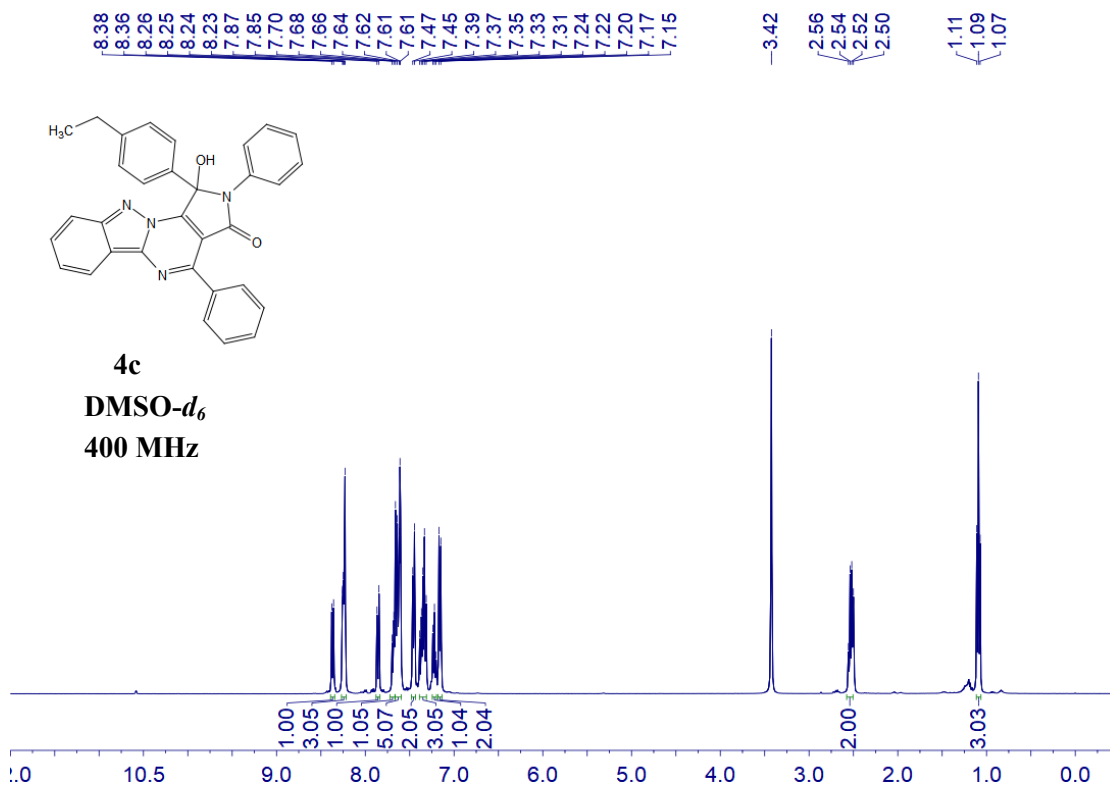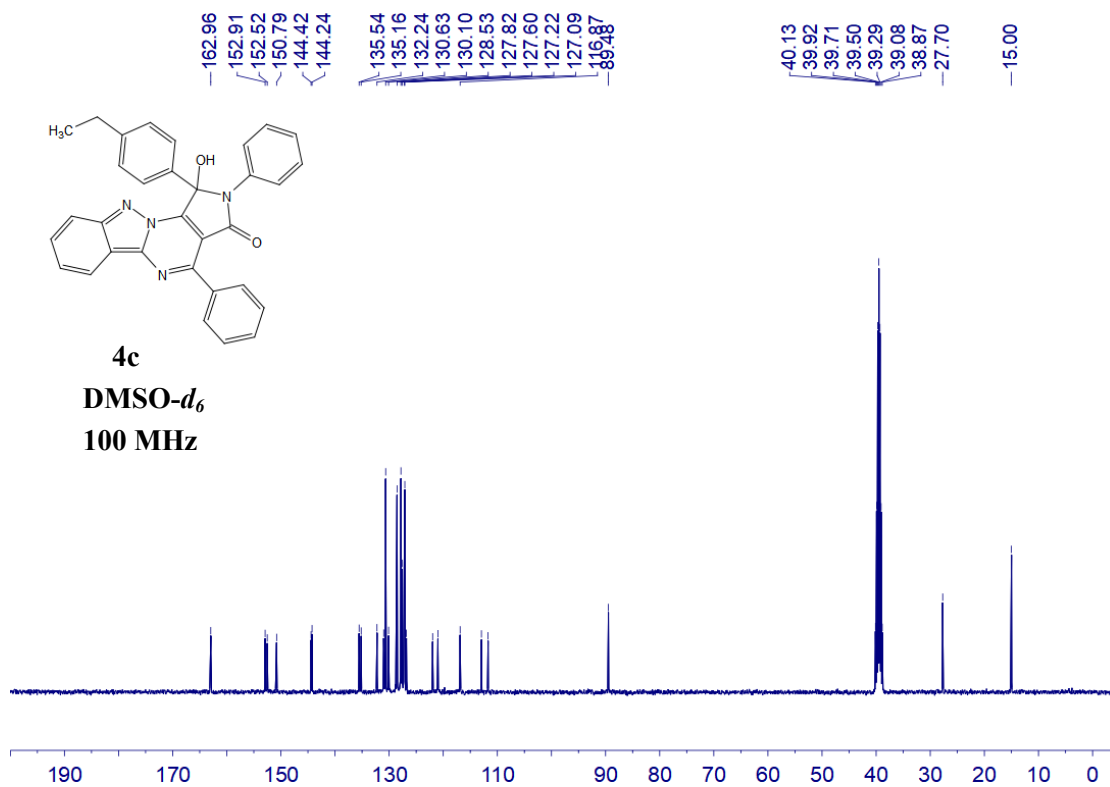

**4d**

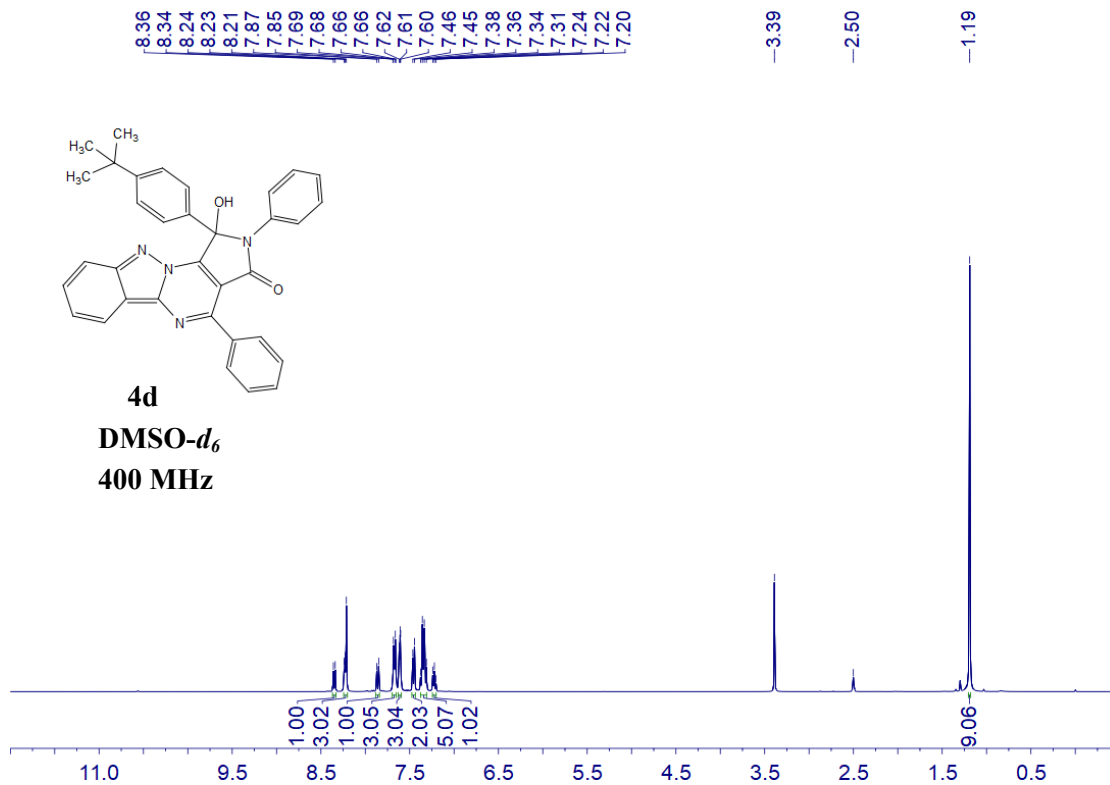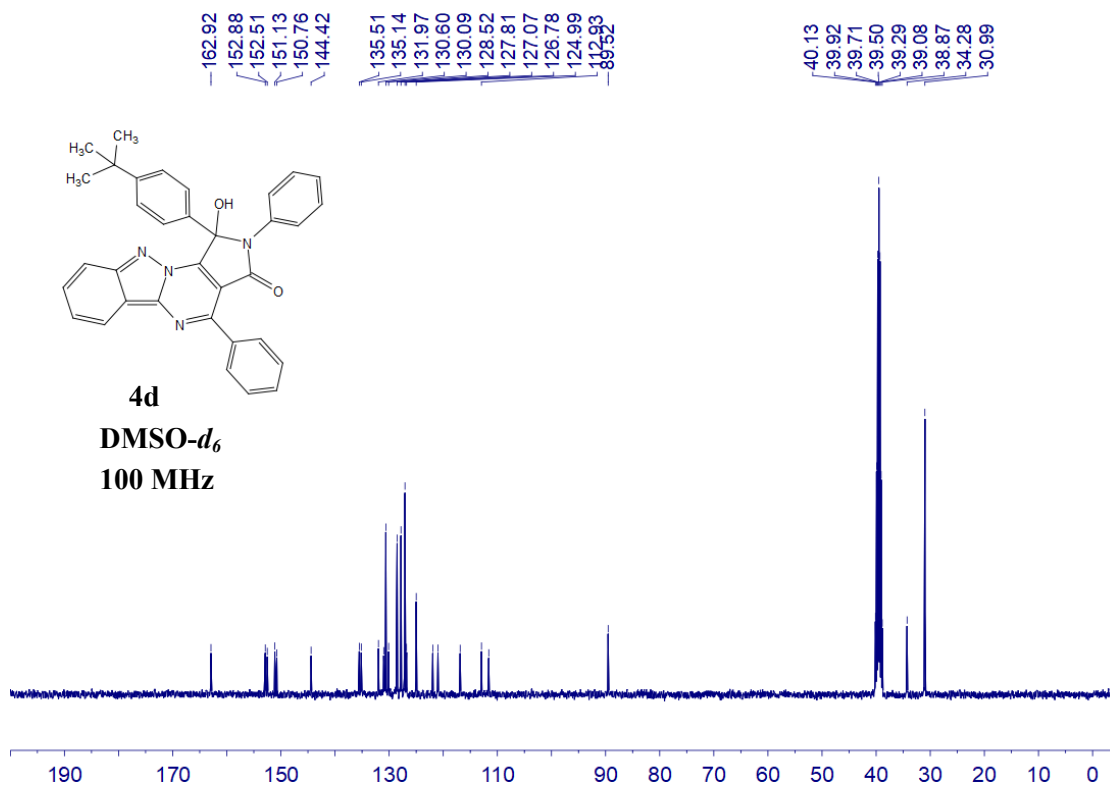

**4e**

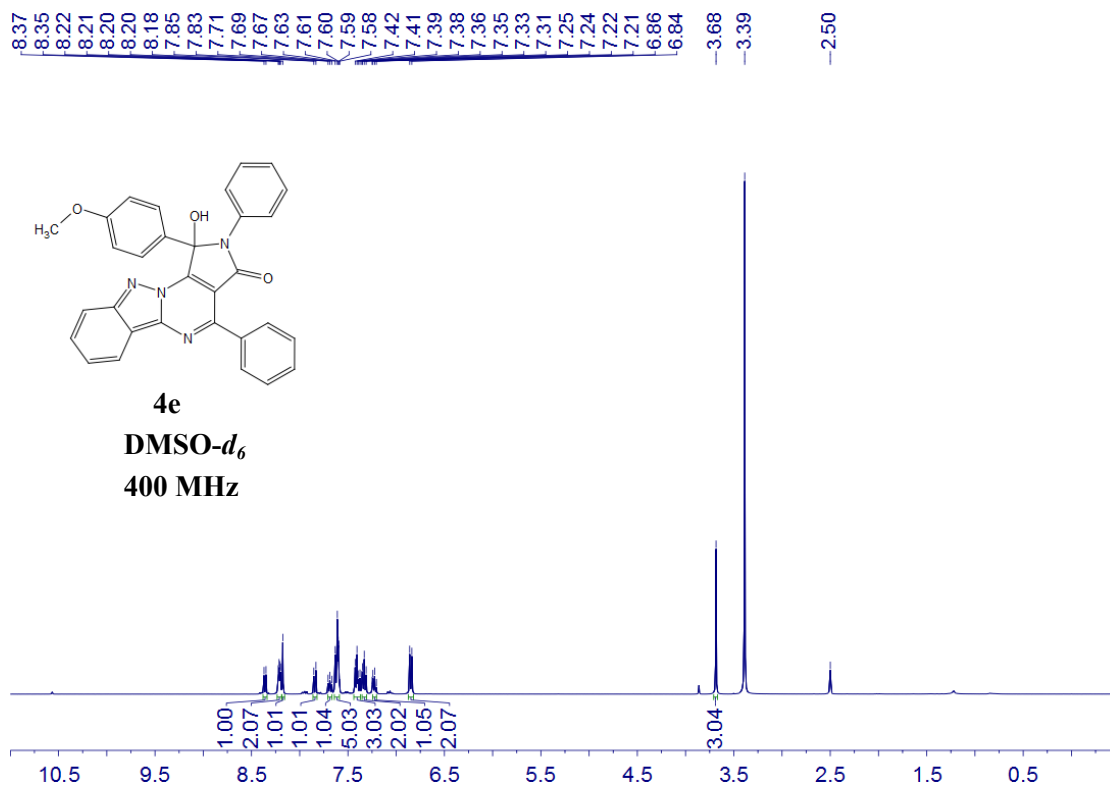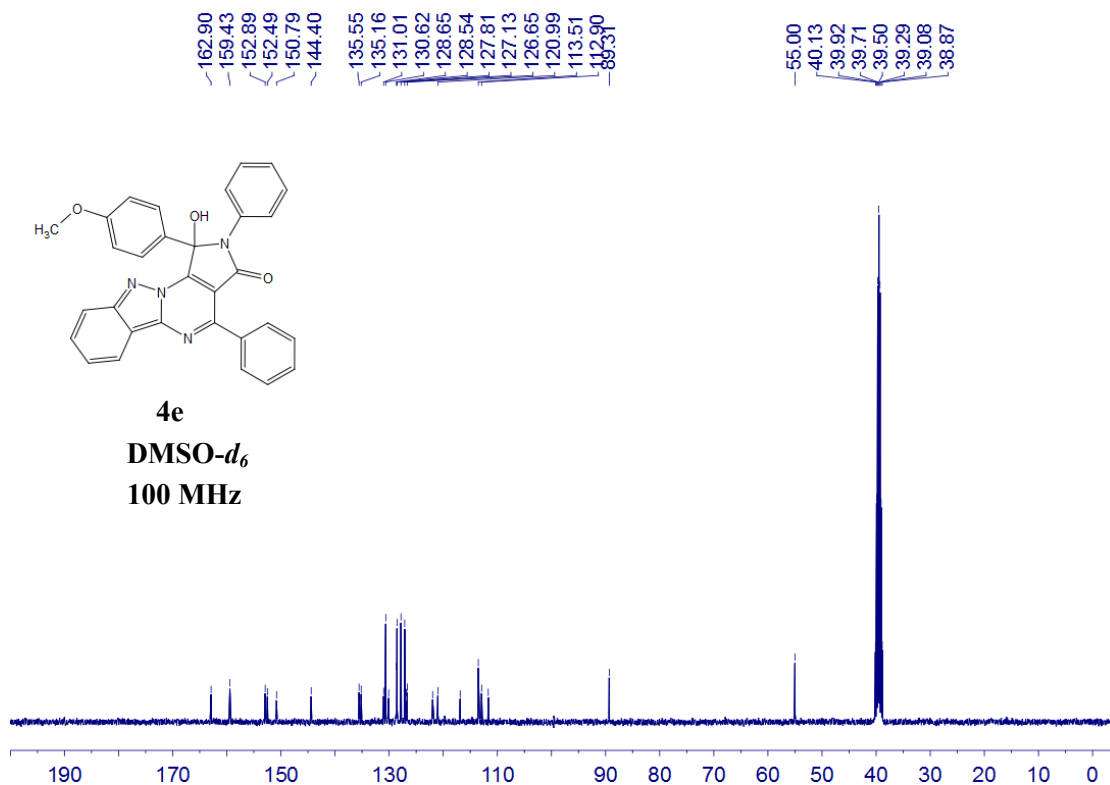

4f

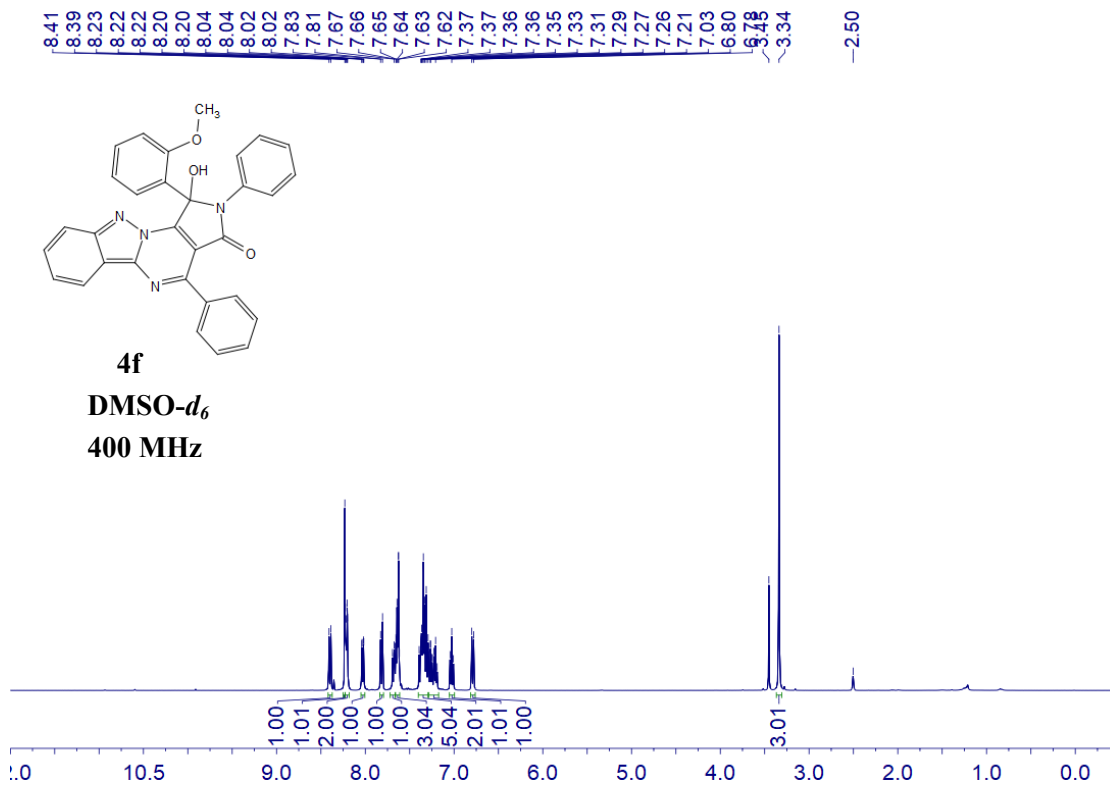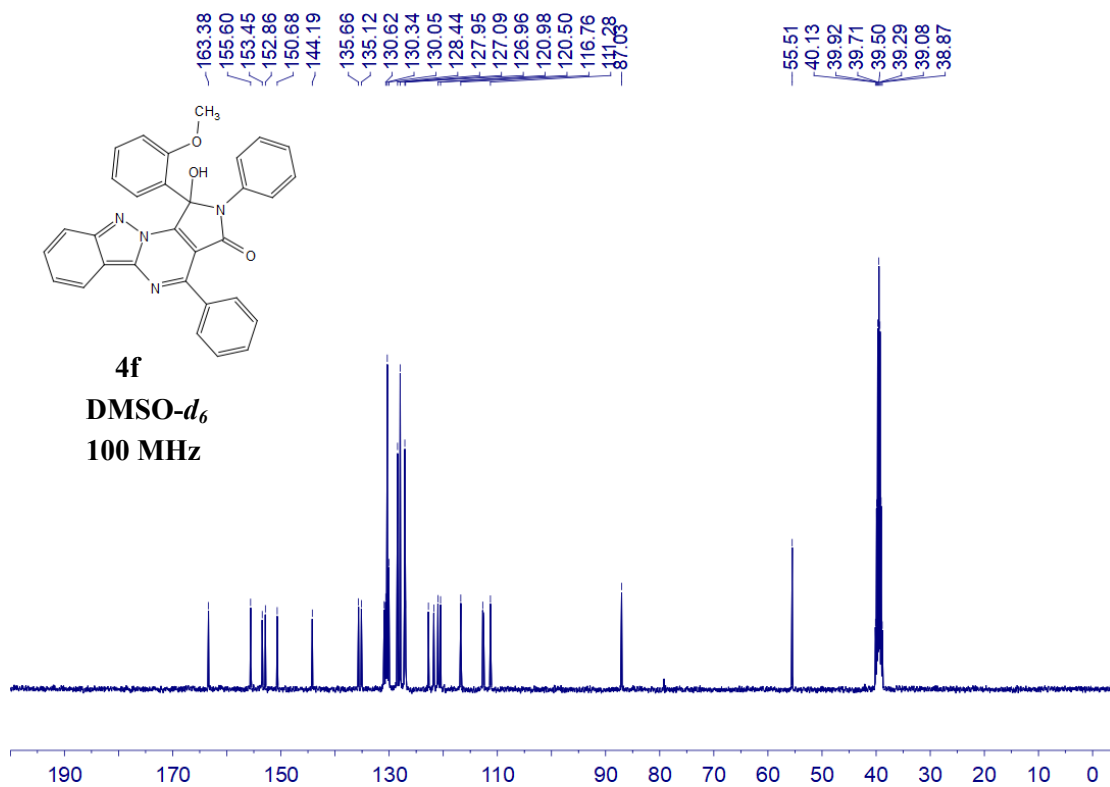

**4g**

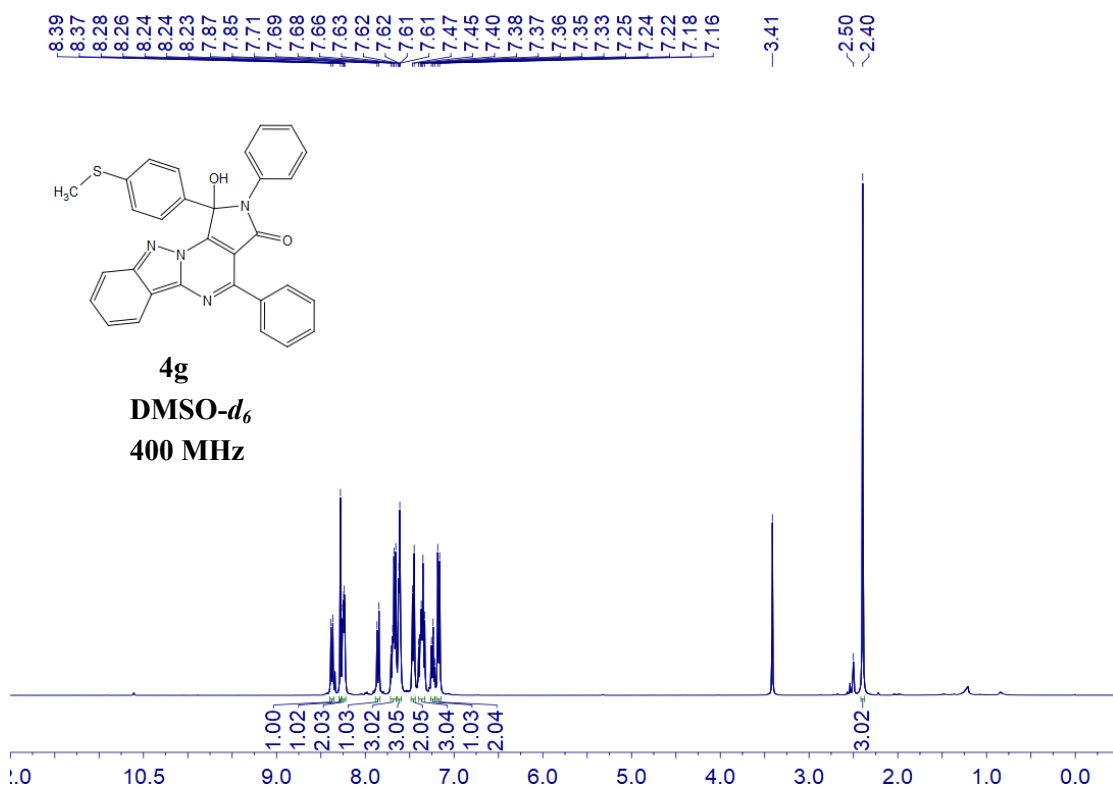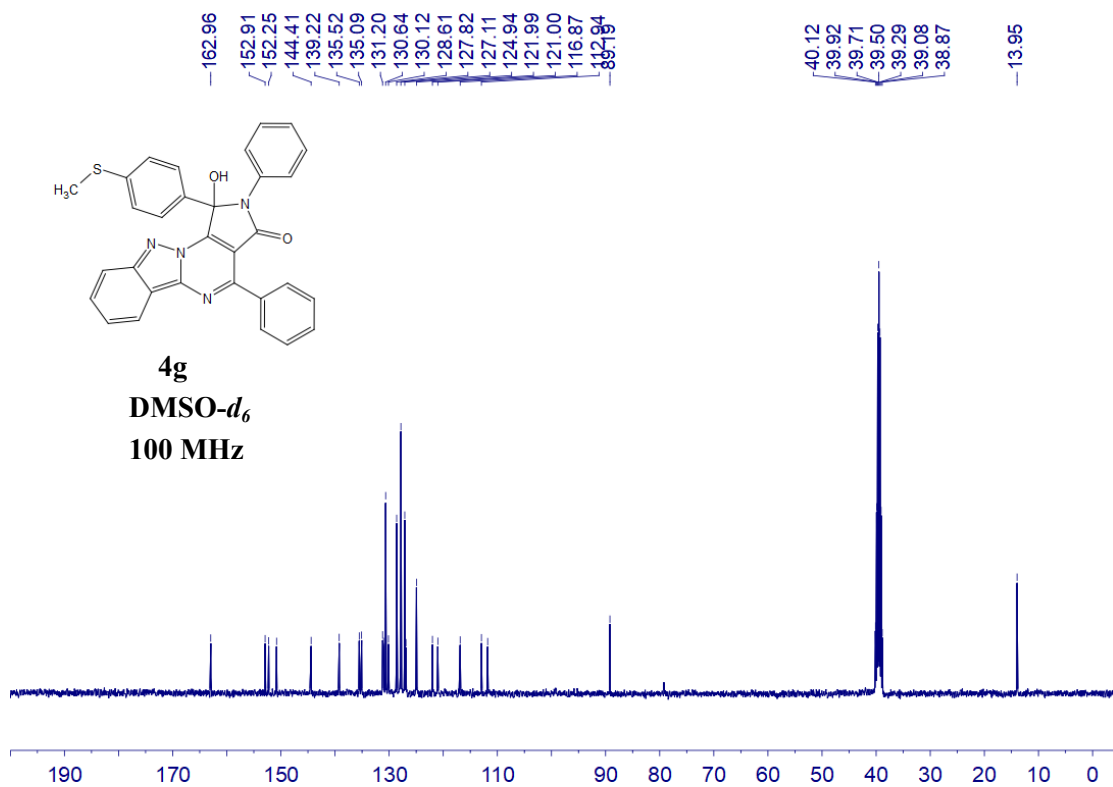

**4h**

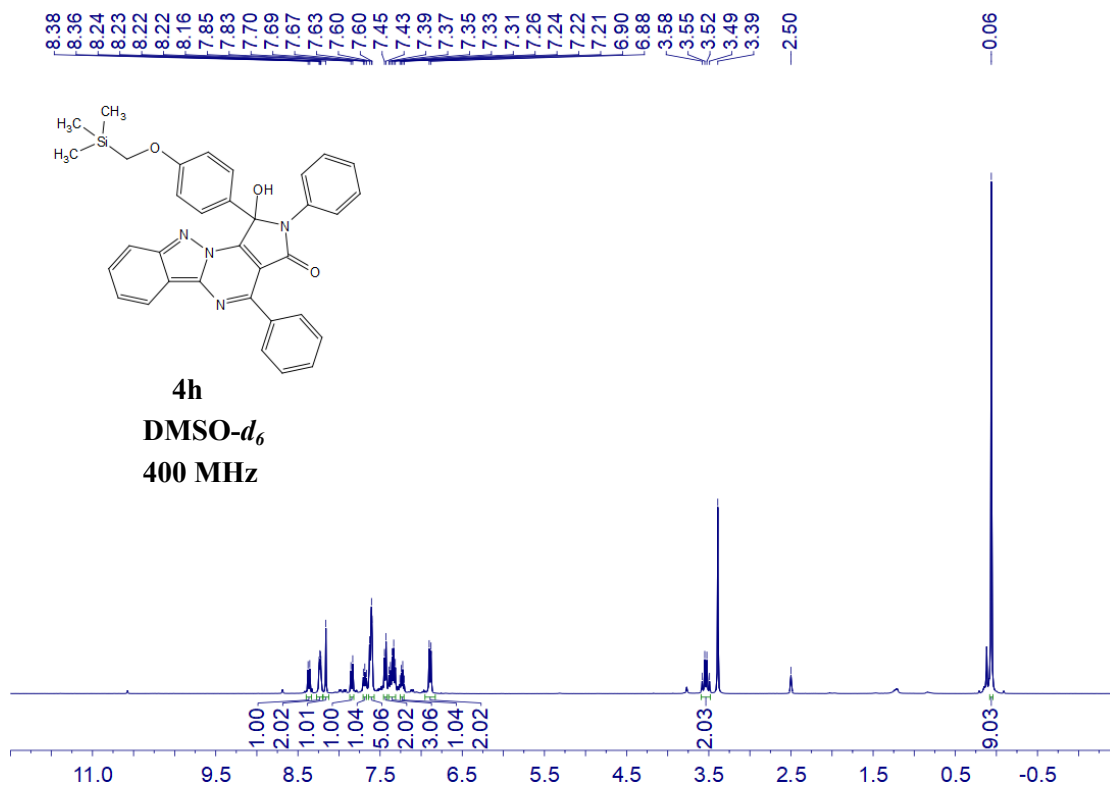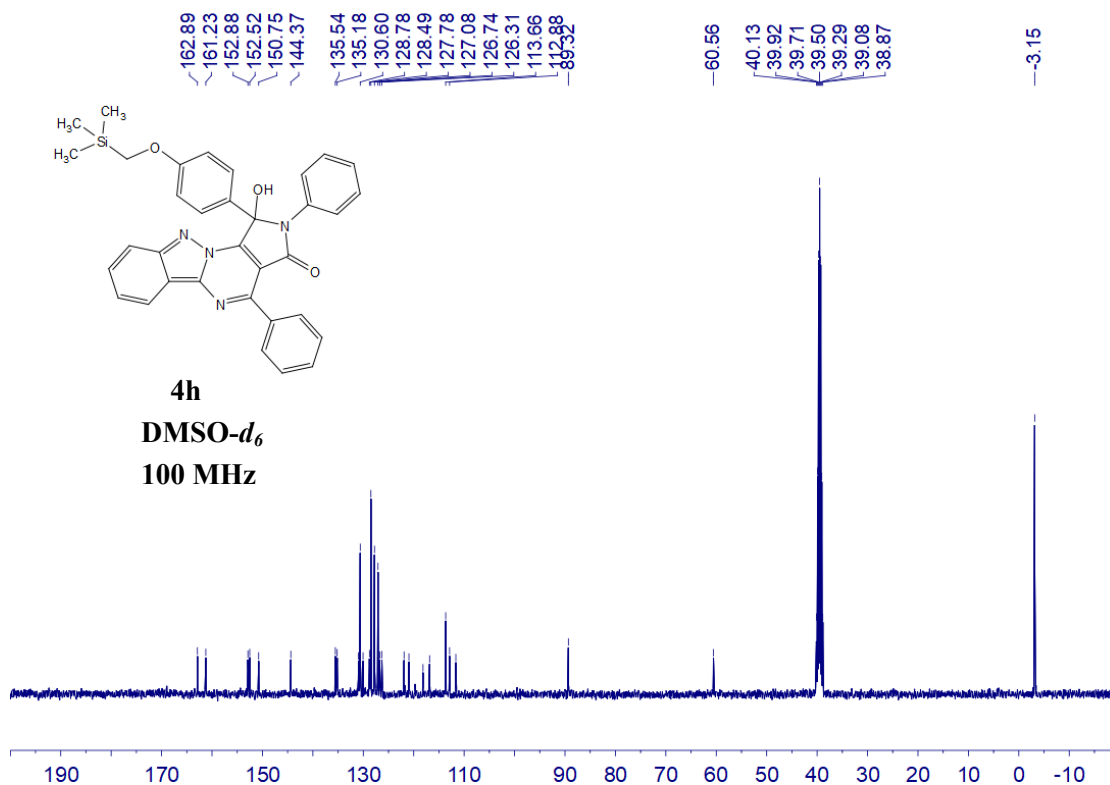

4i

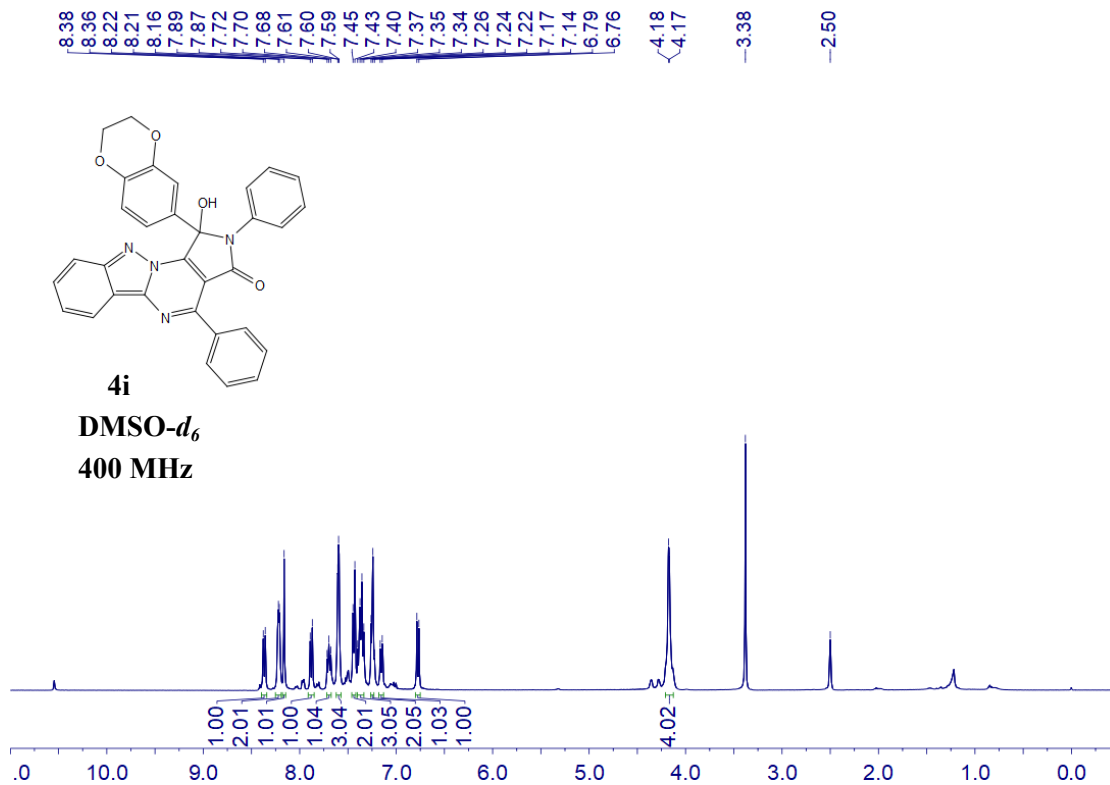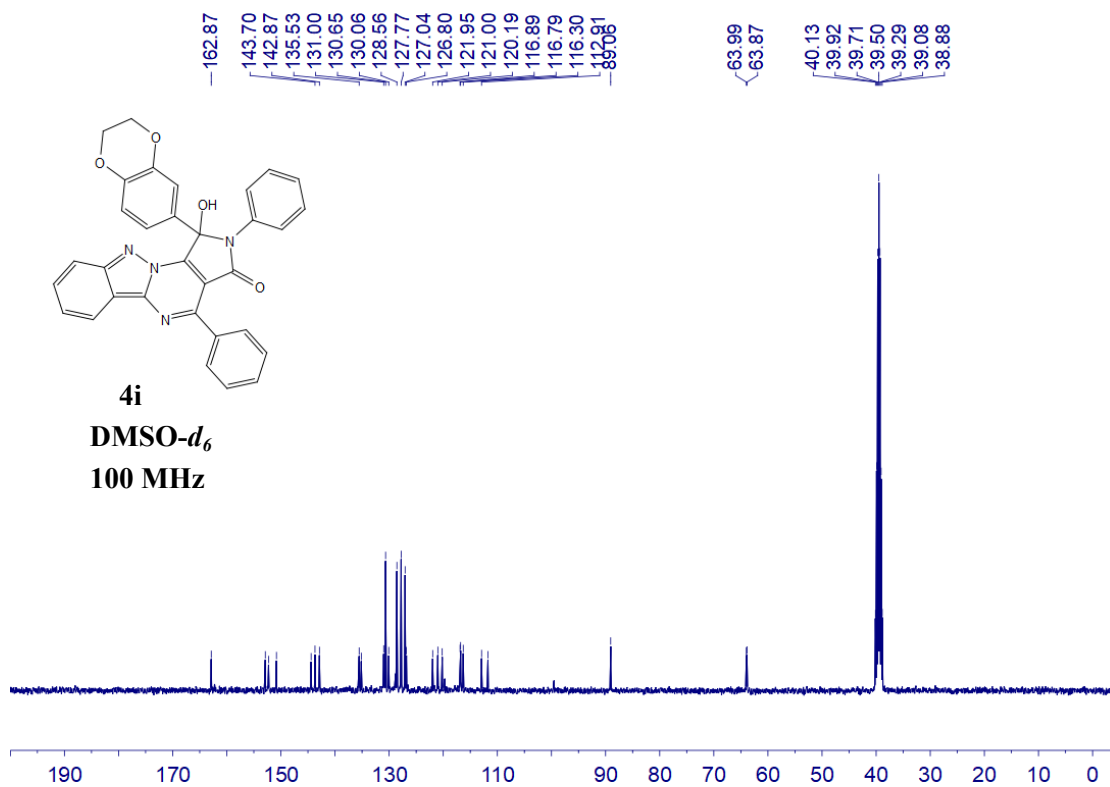

4j

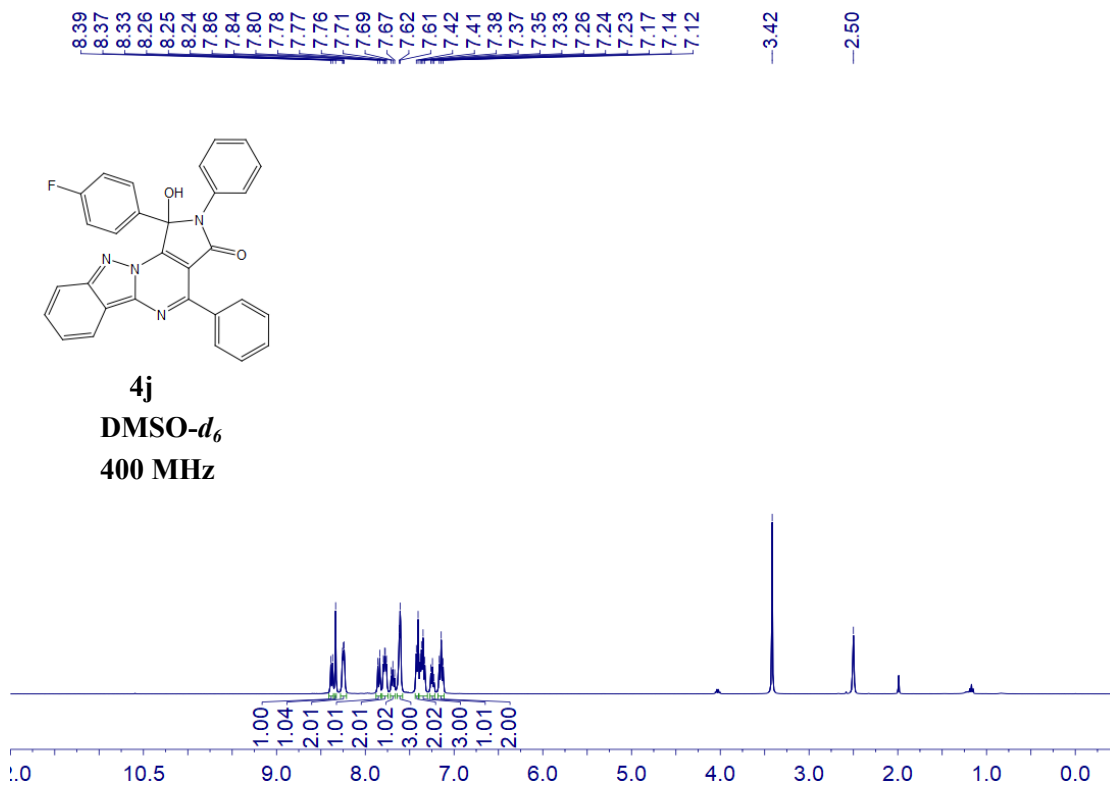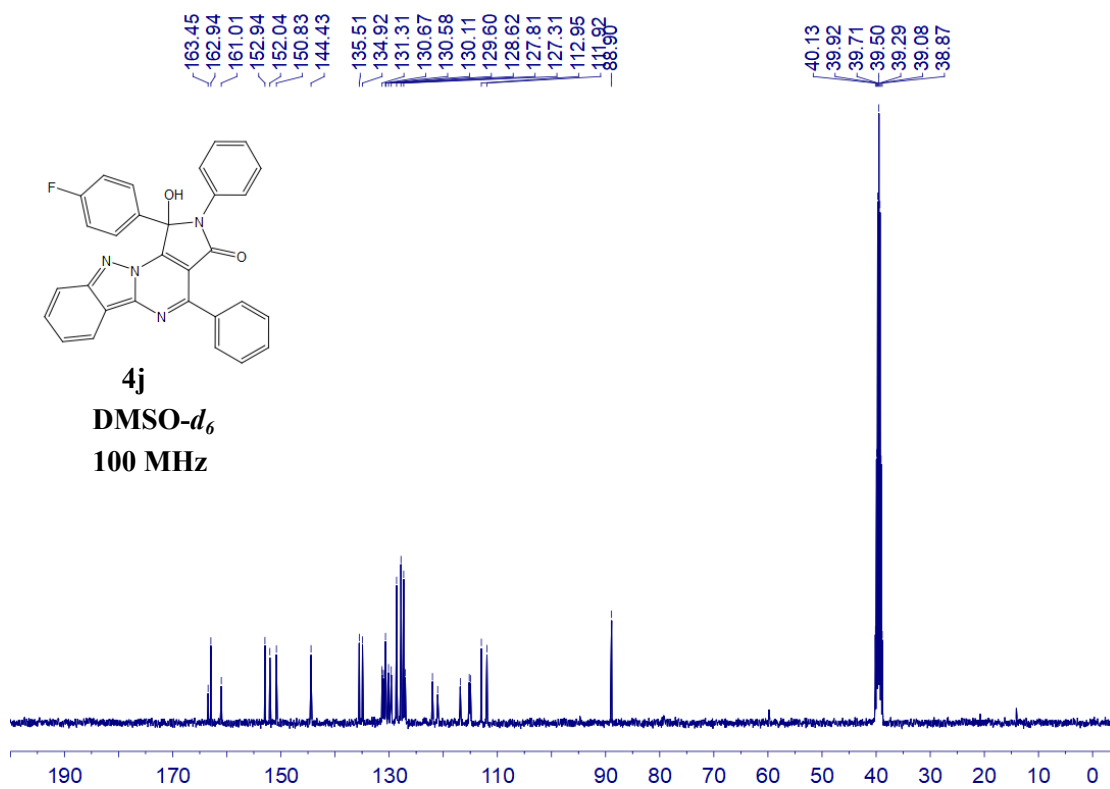



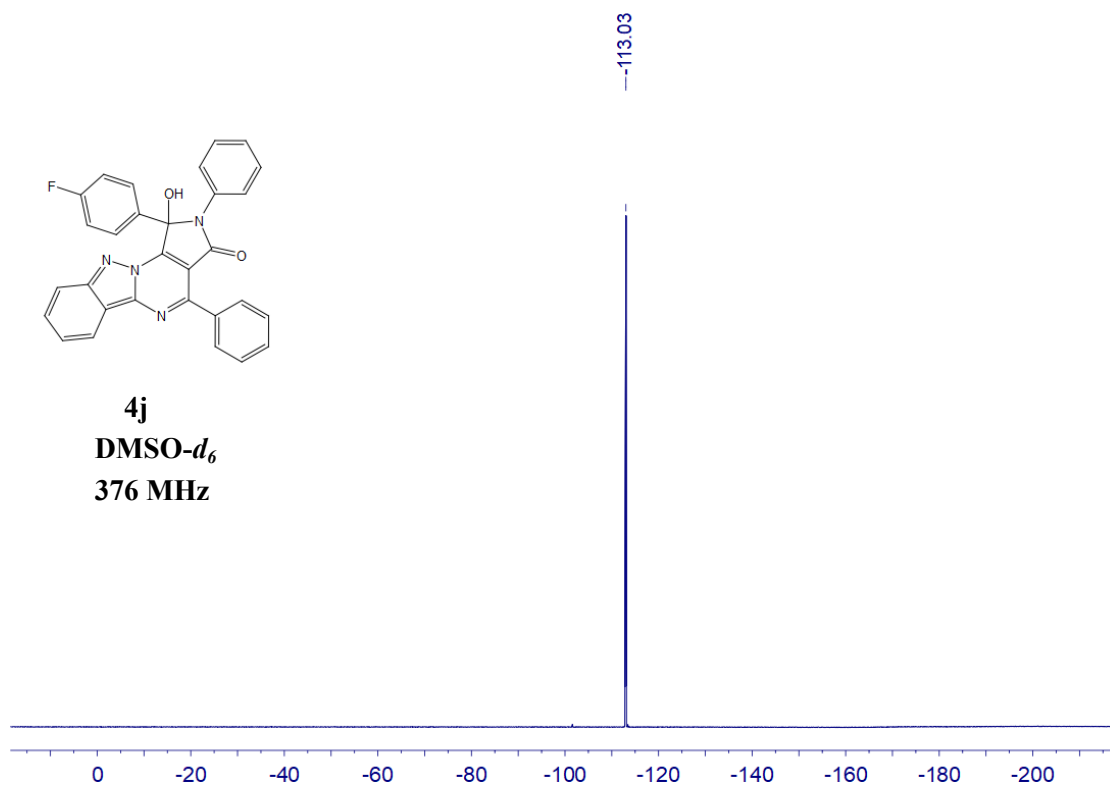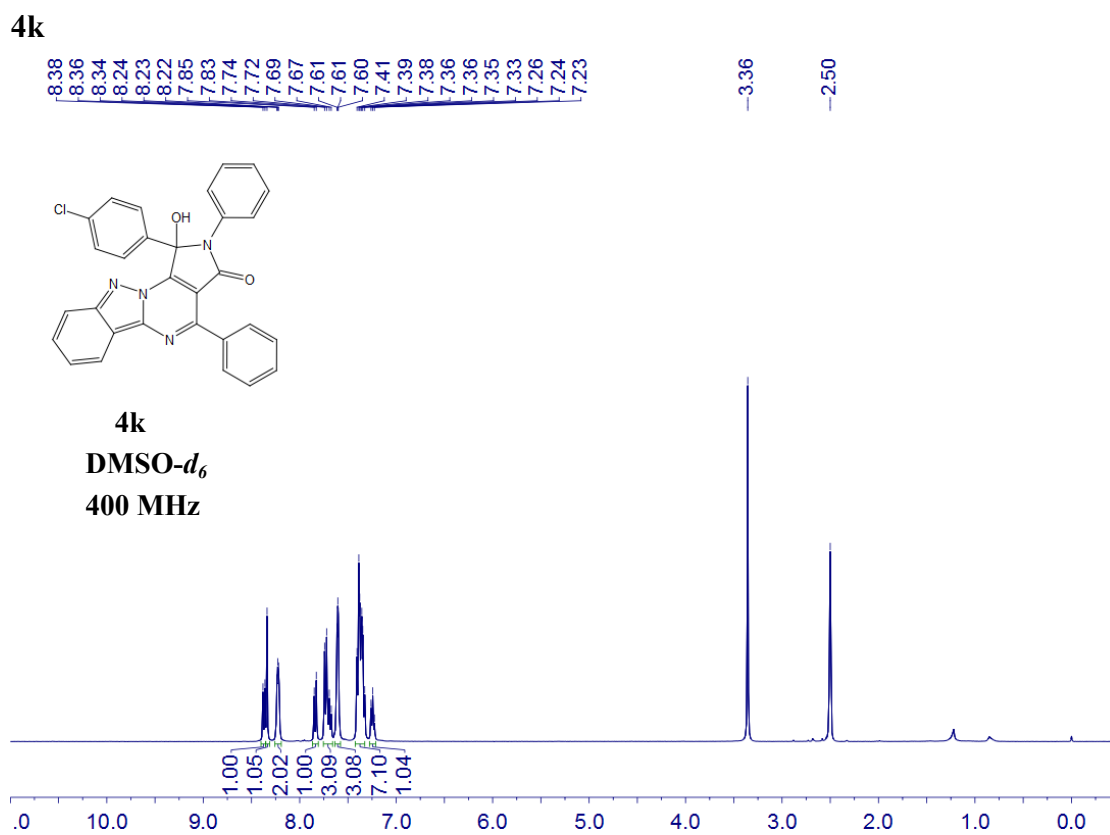

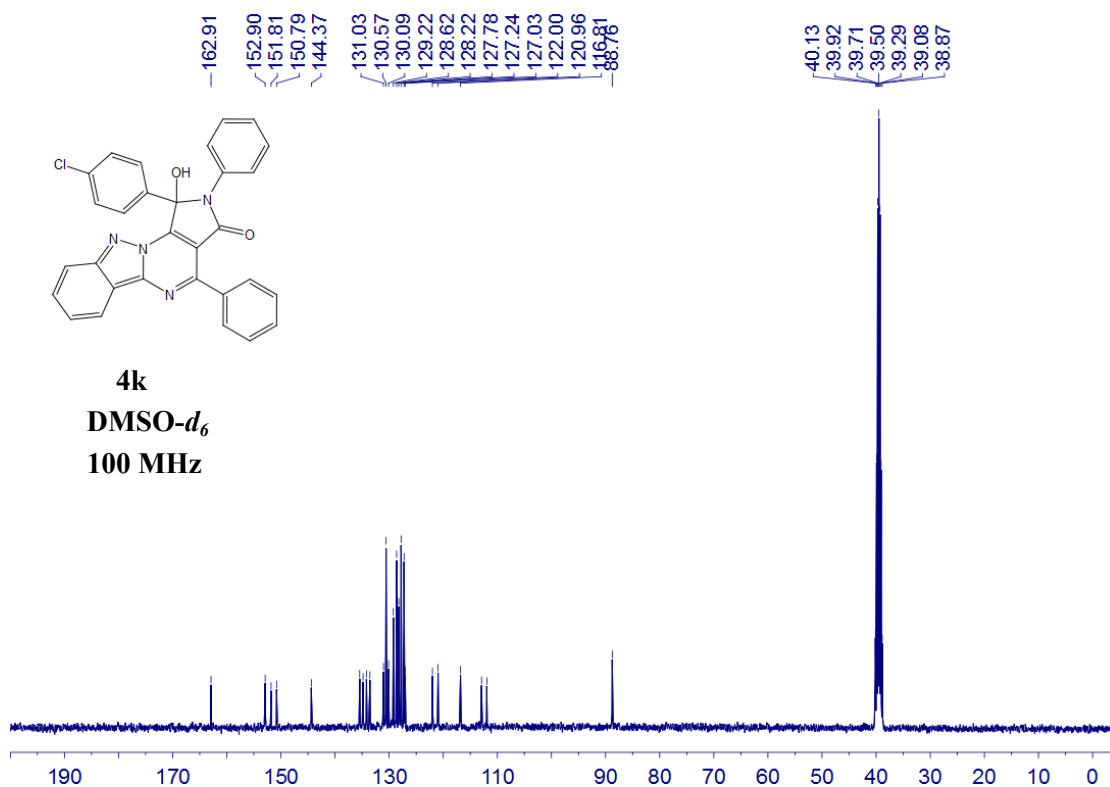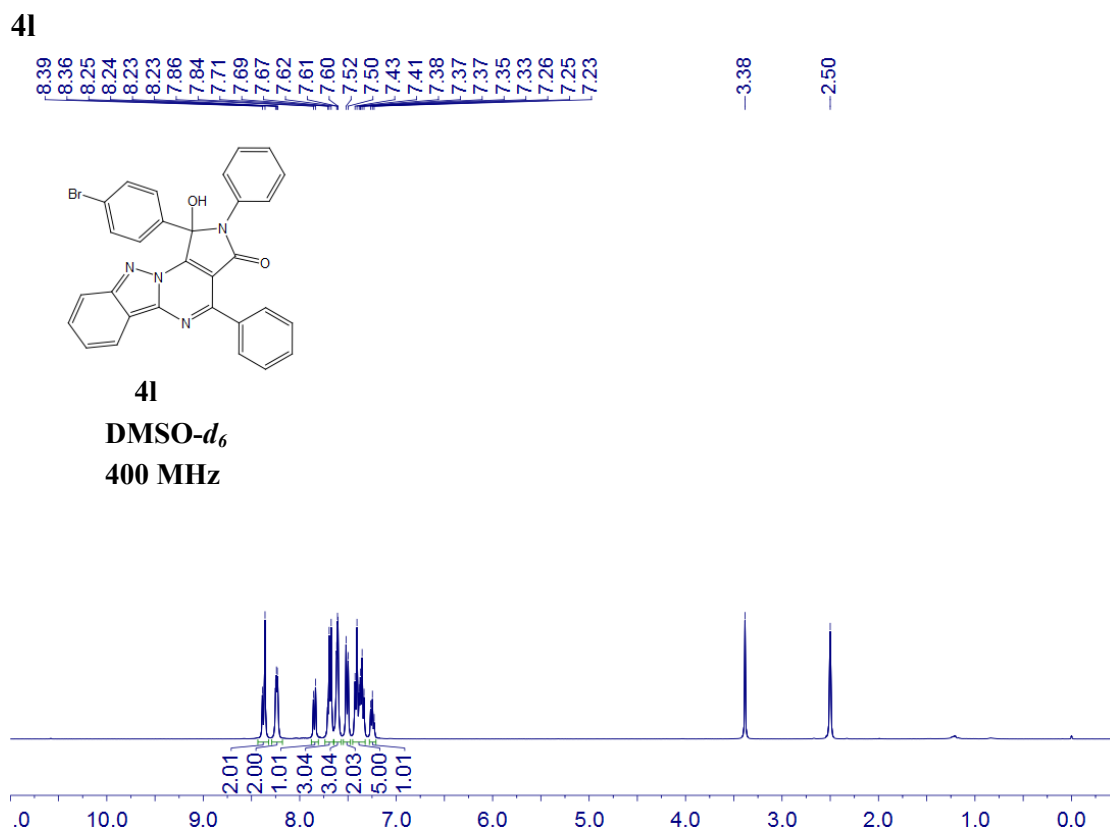

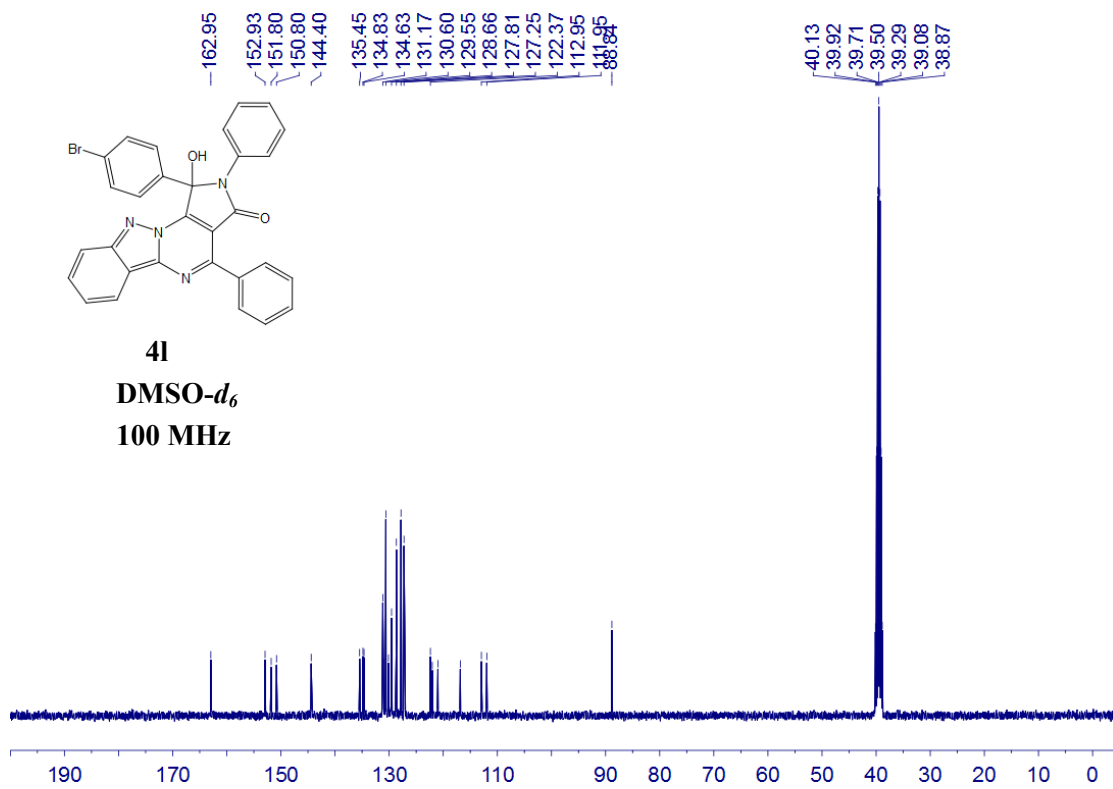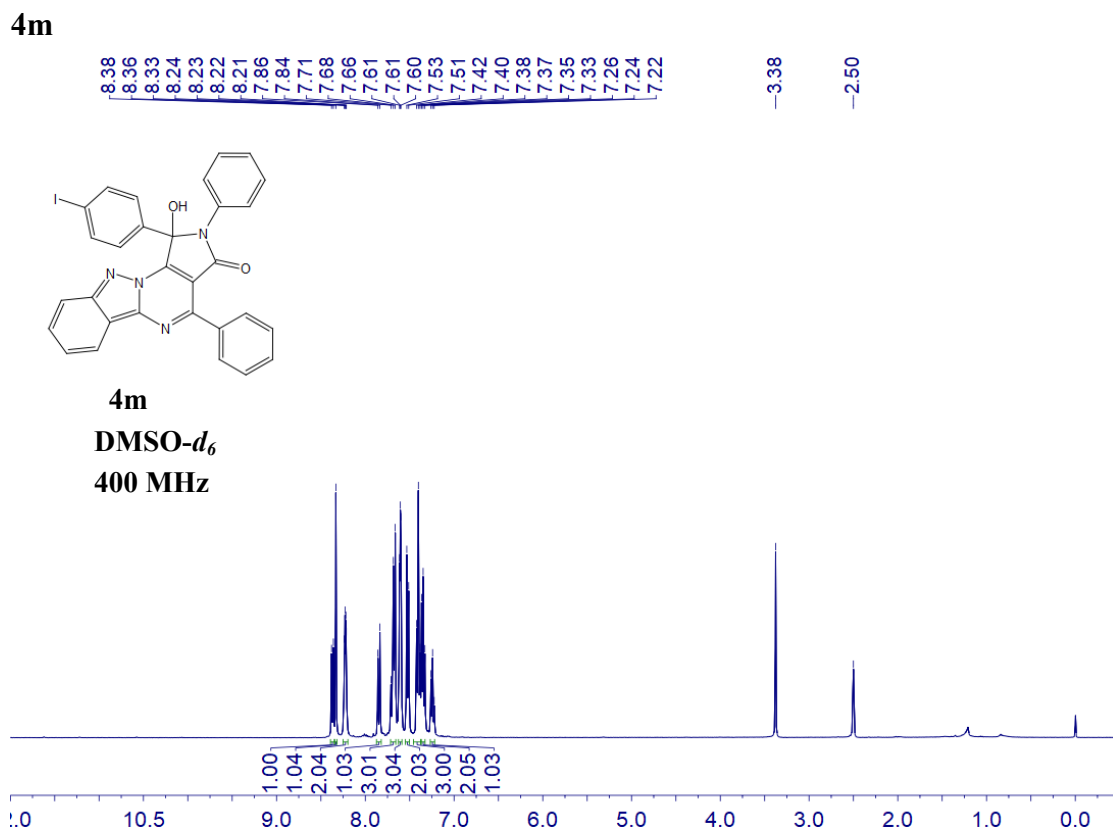

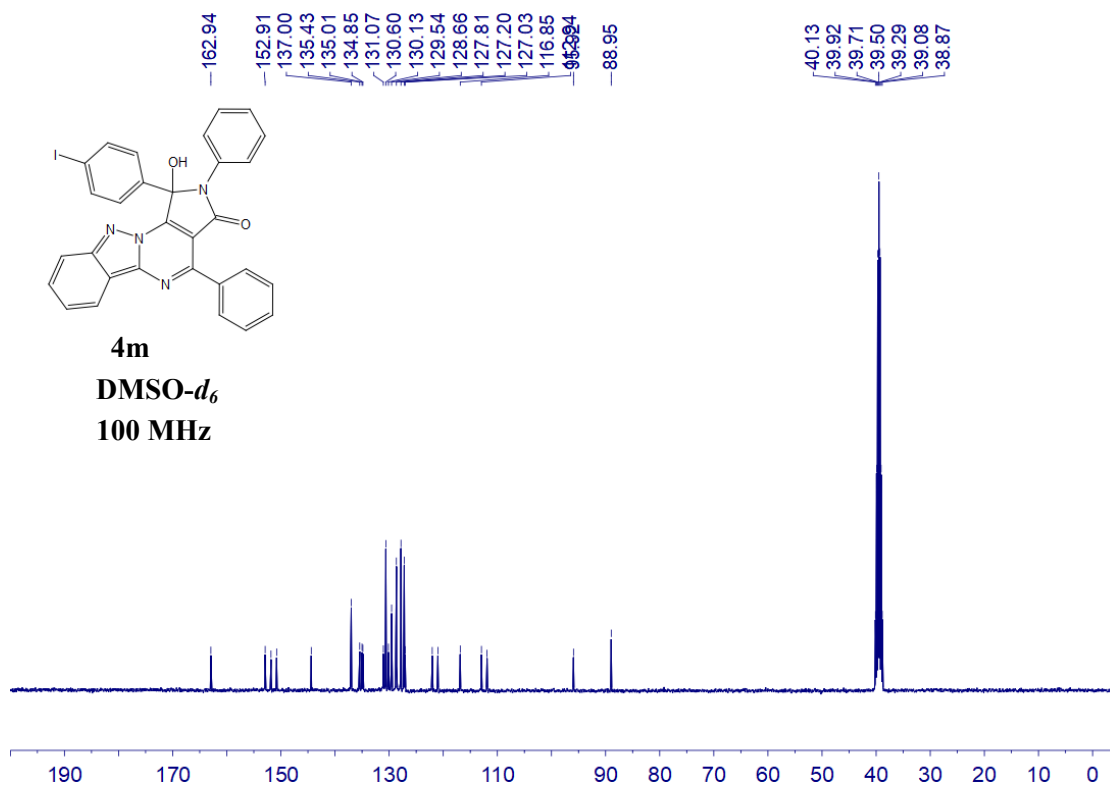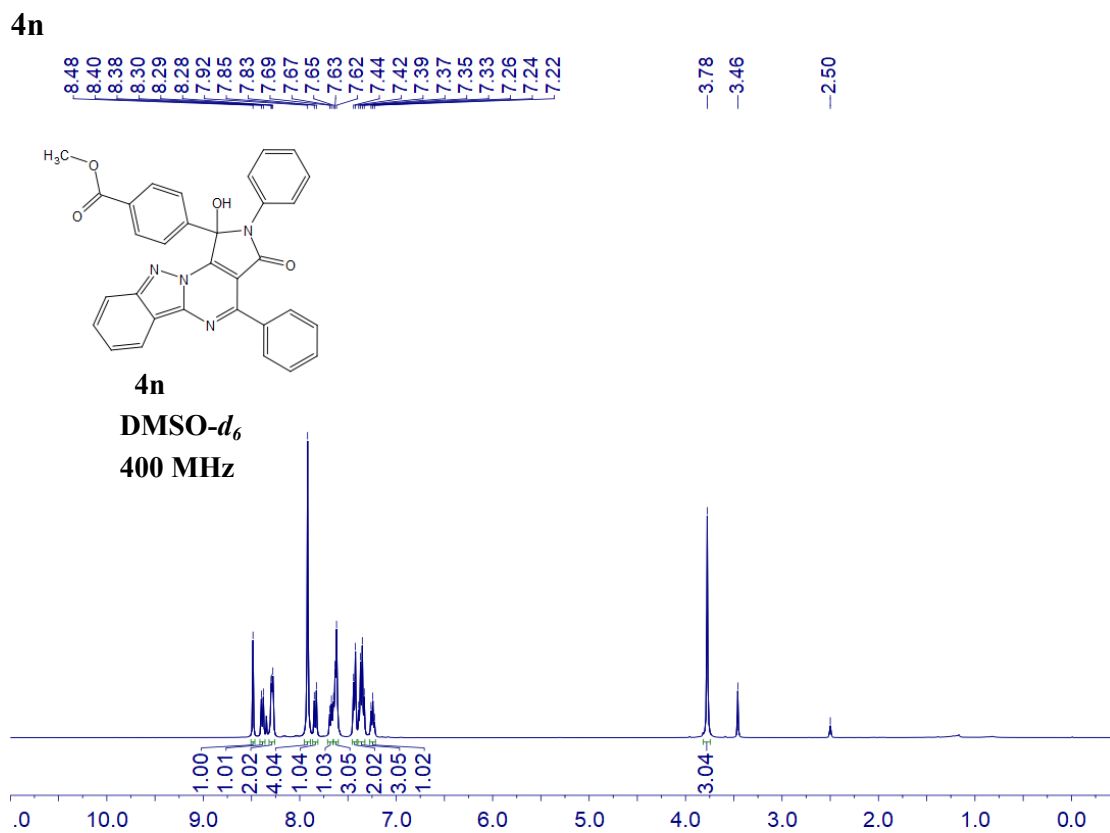

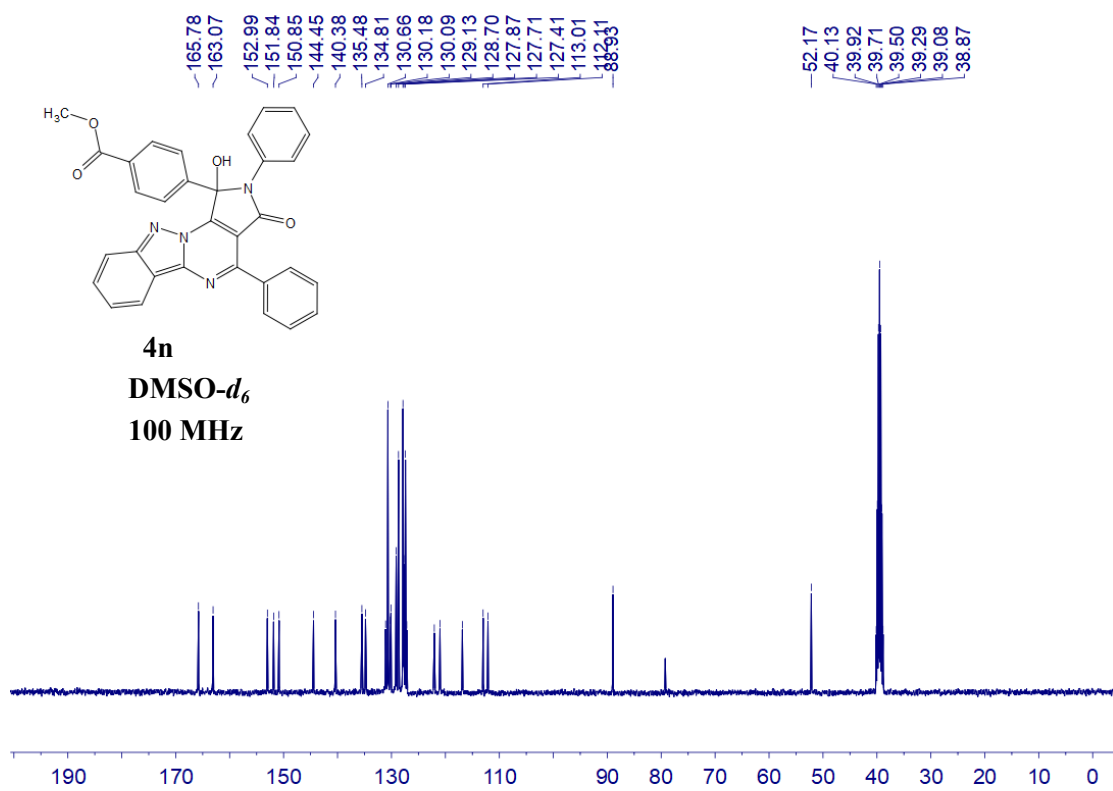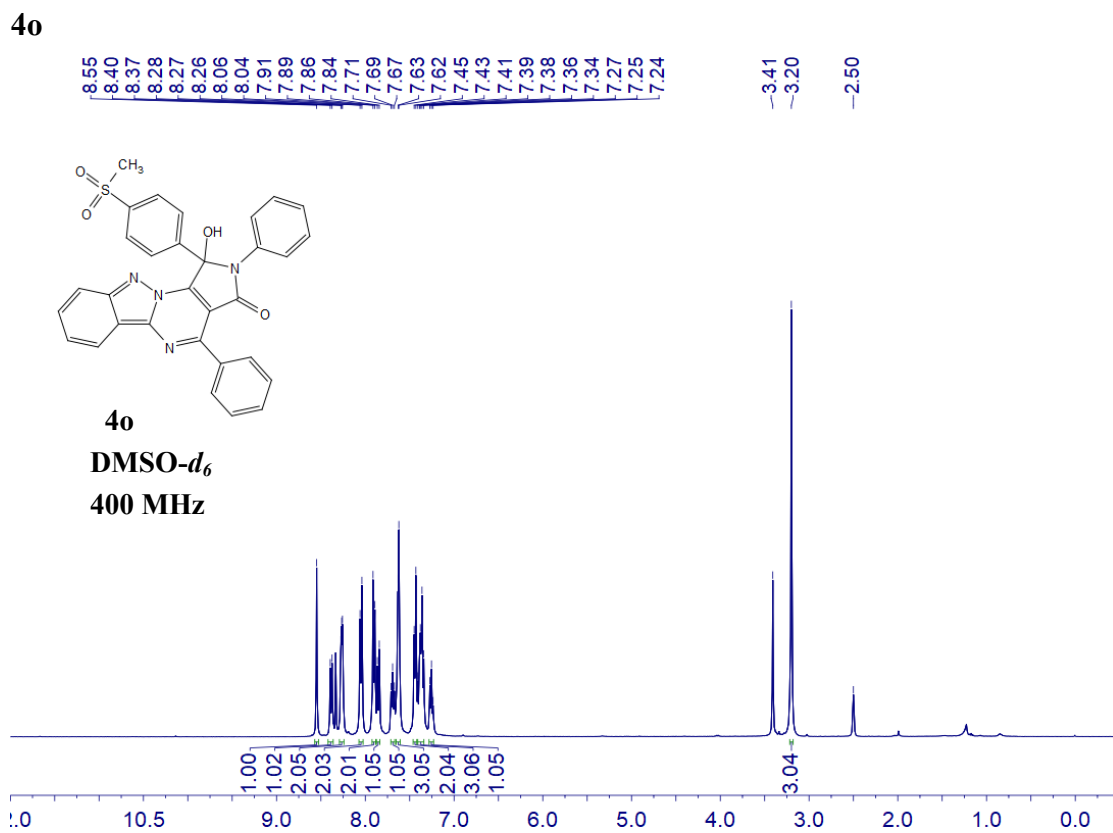

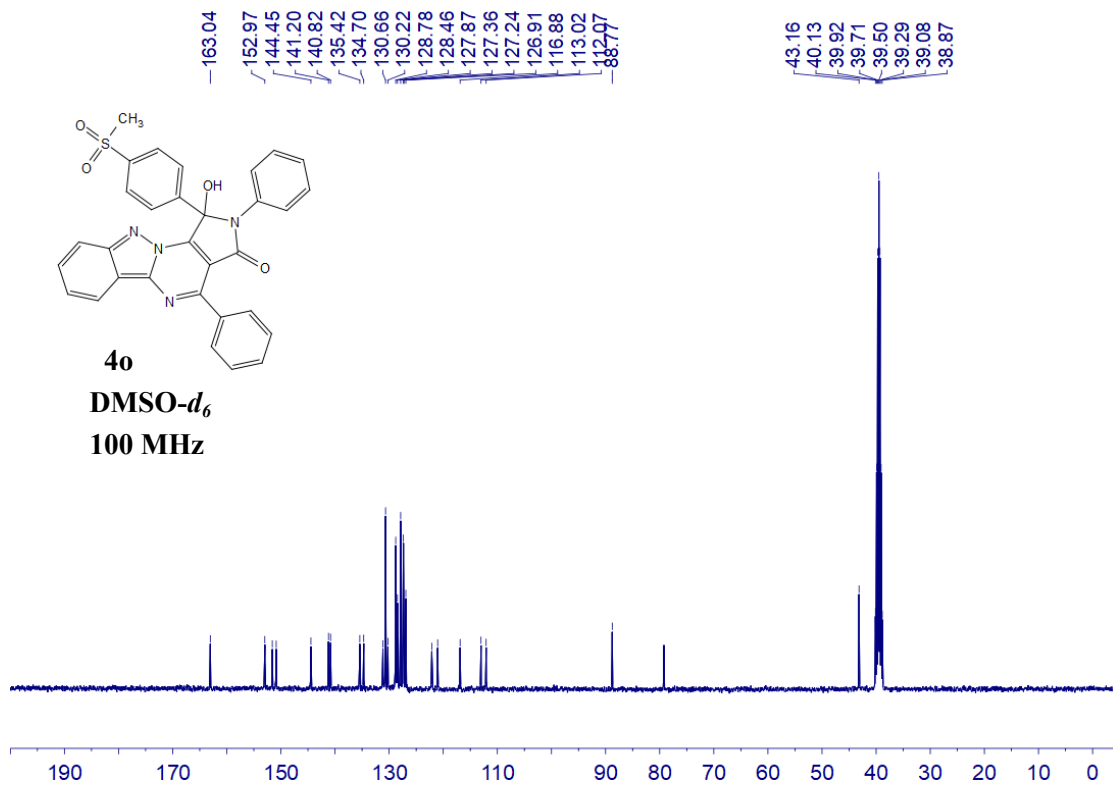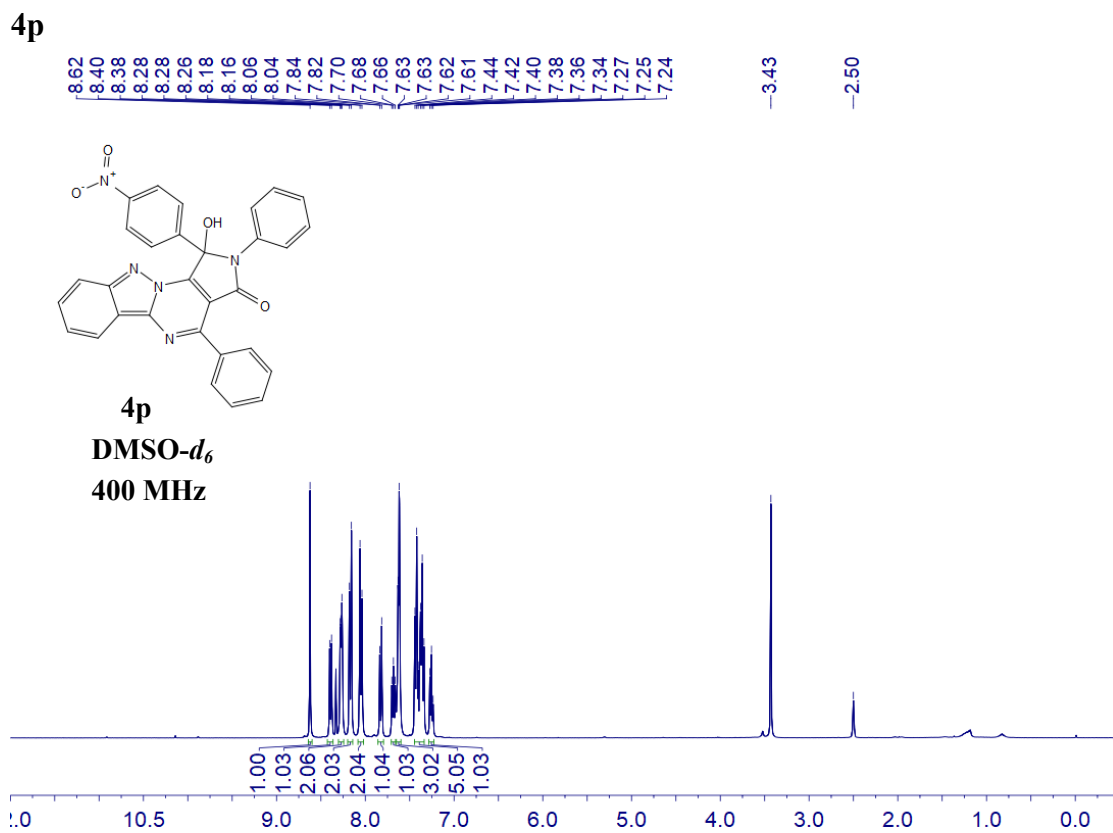

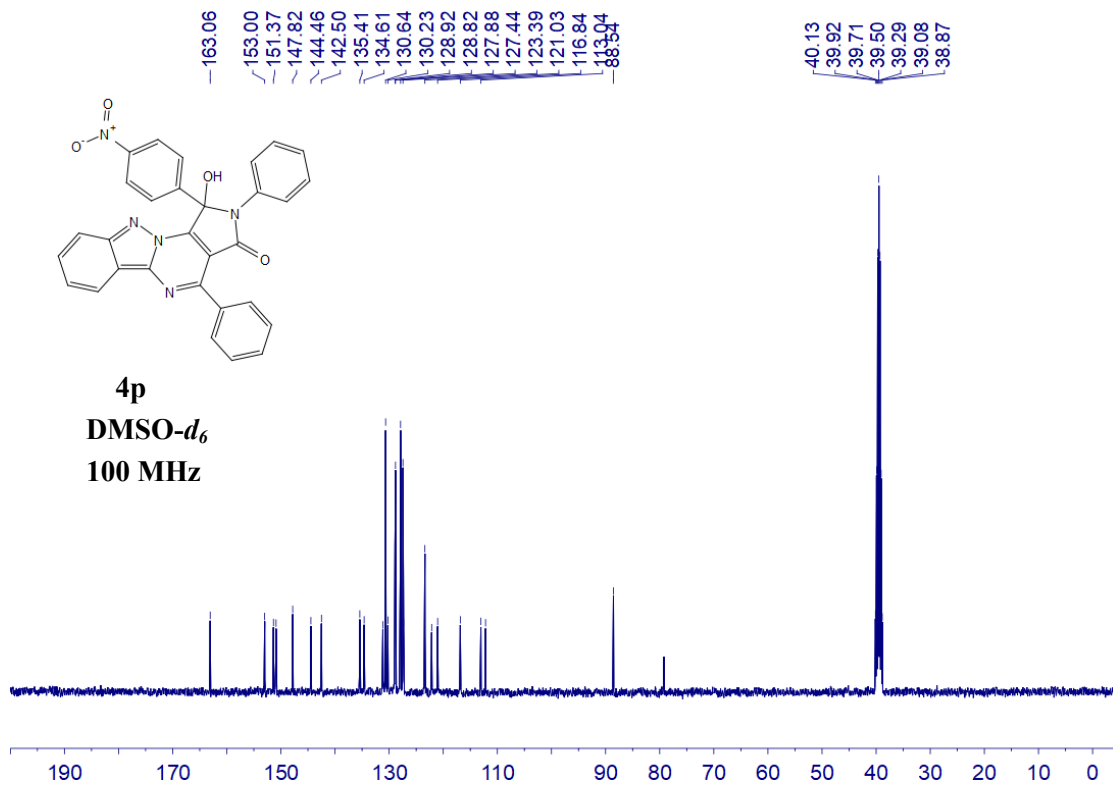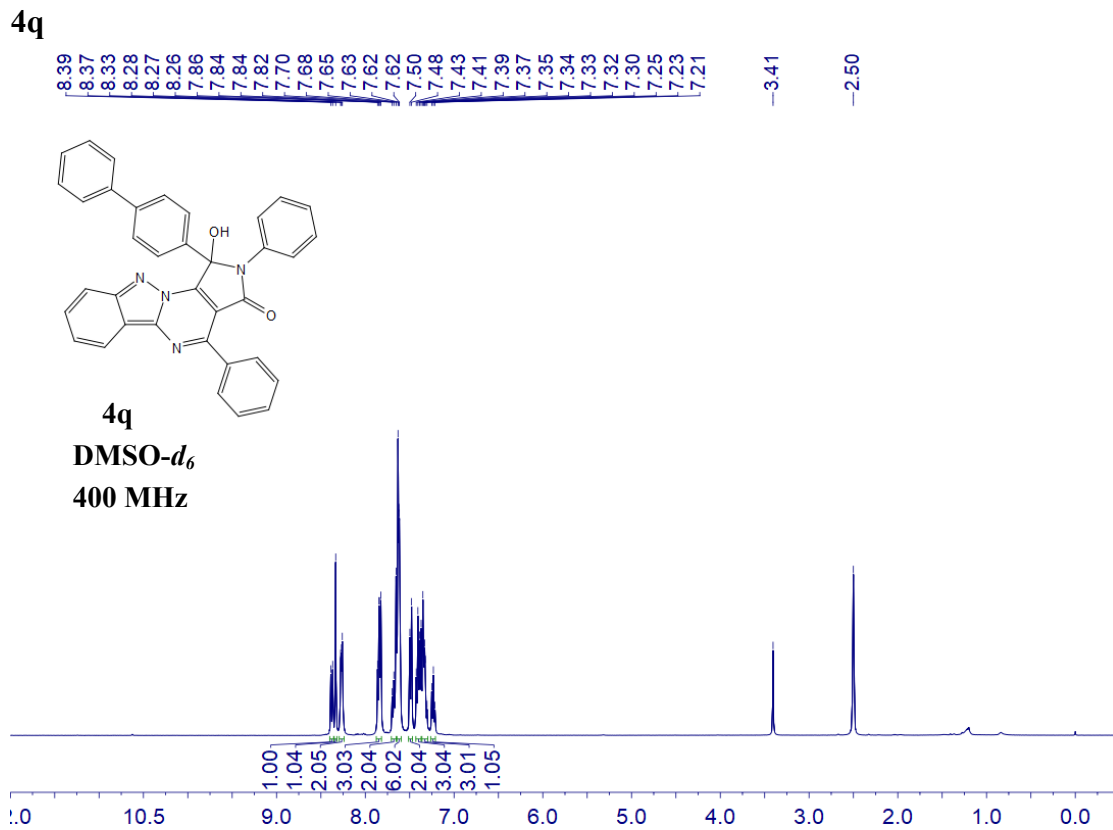

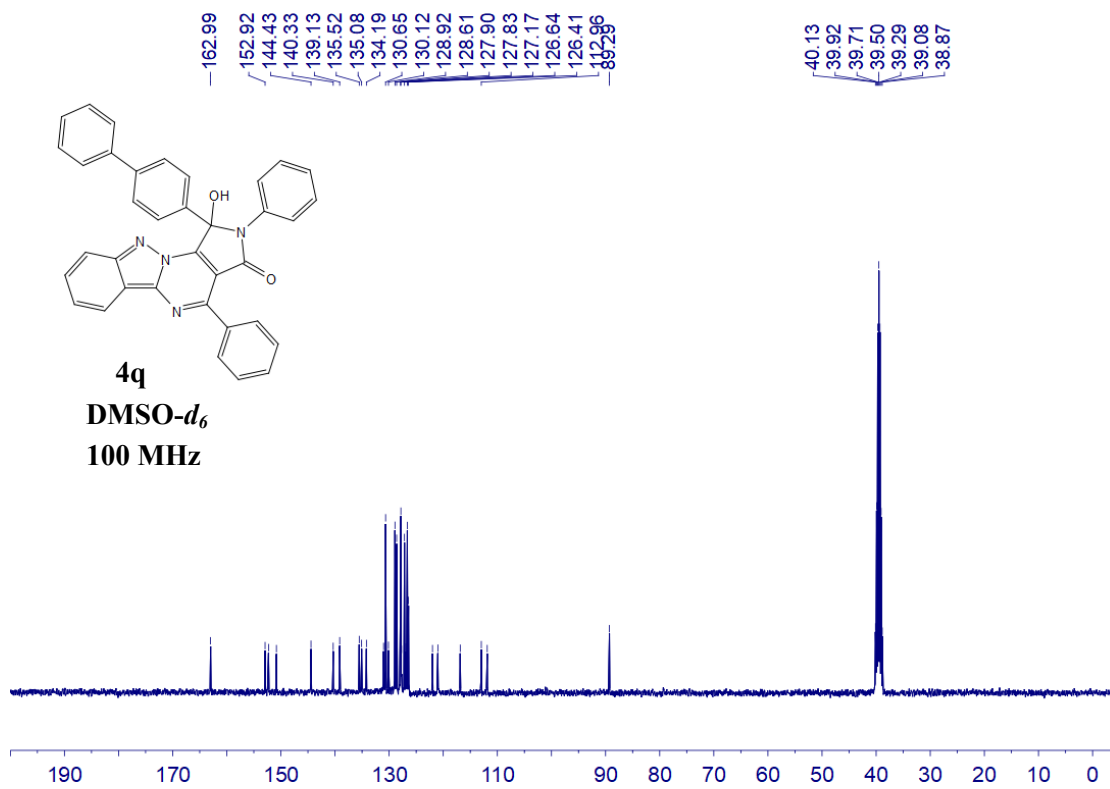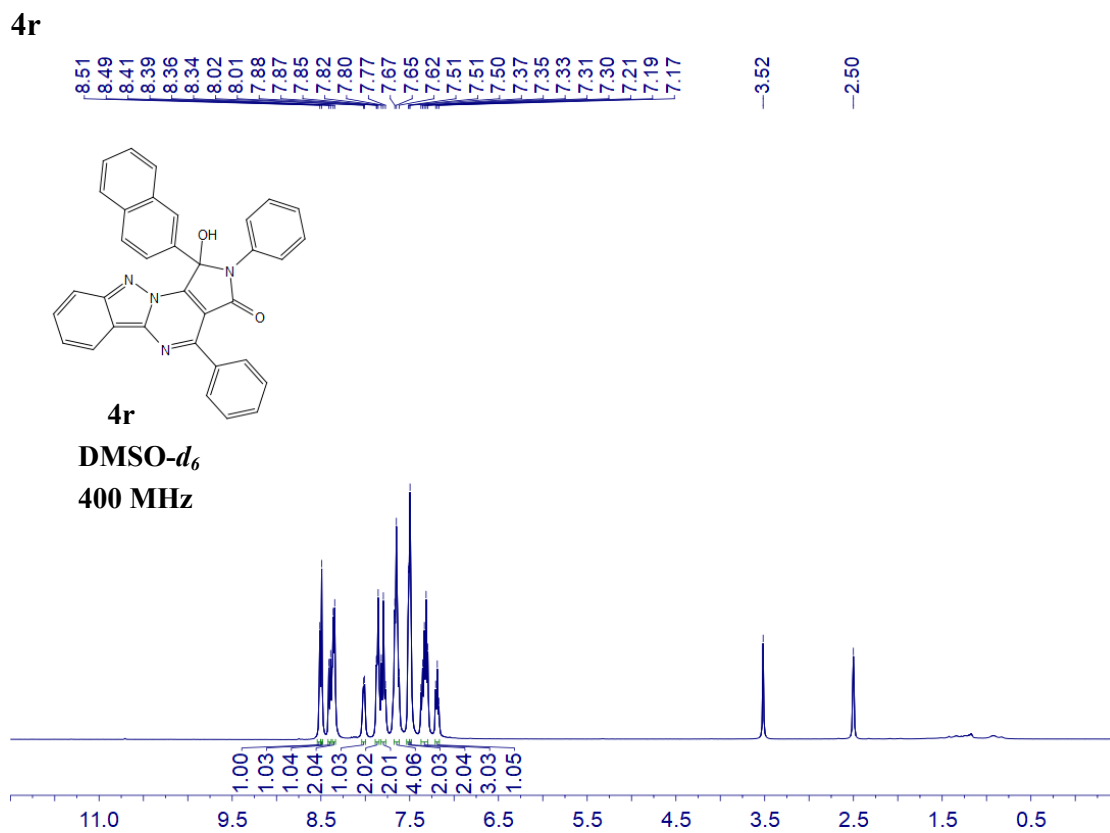



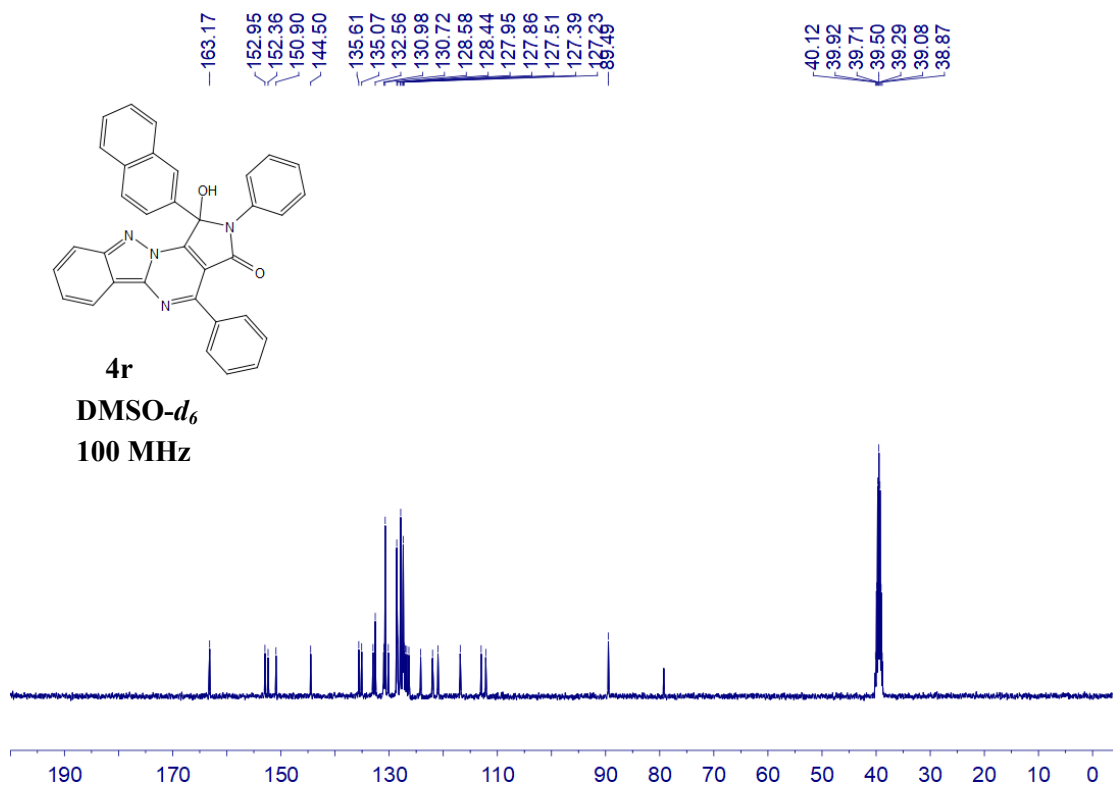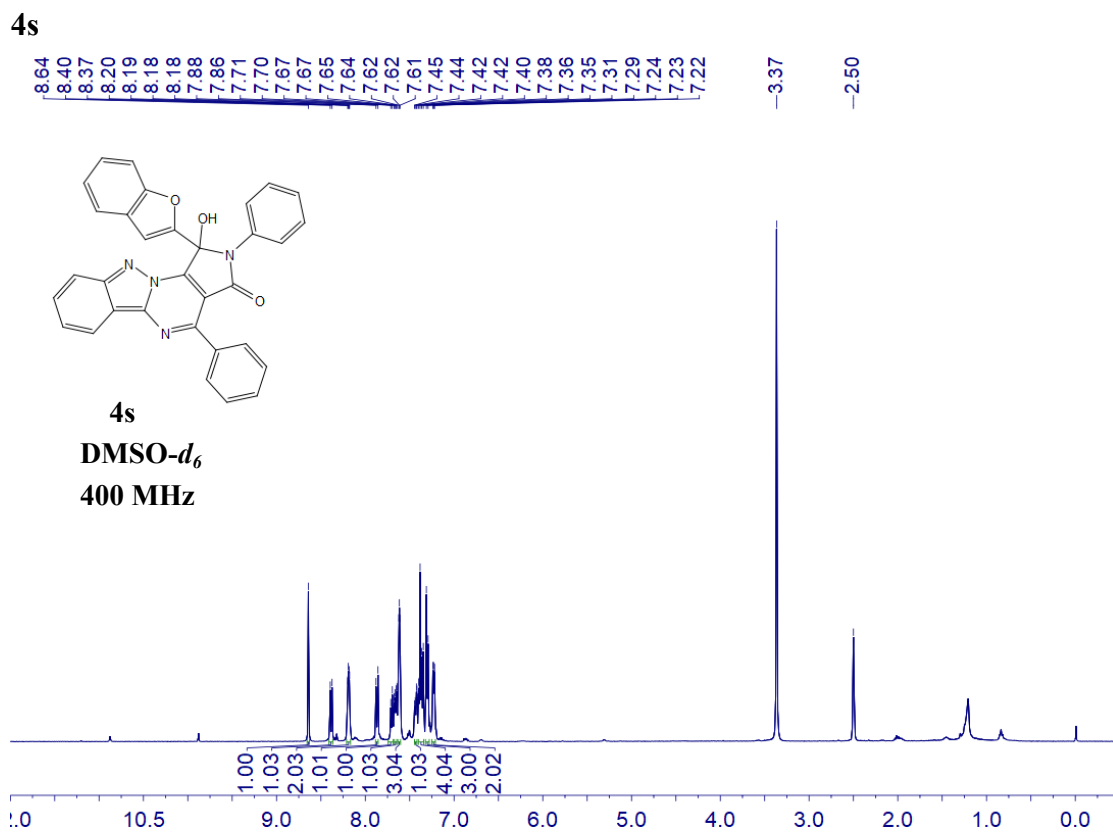

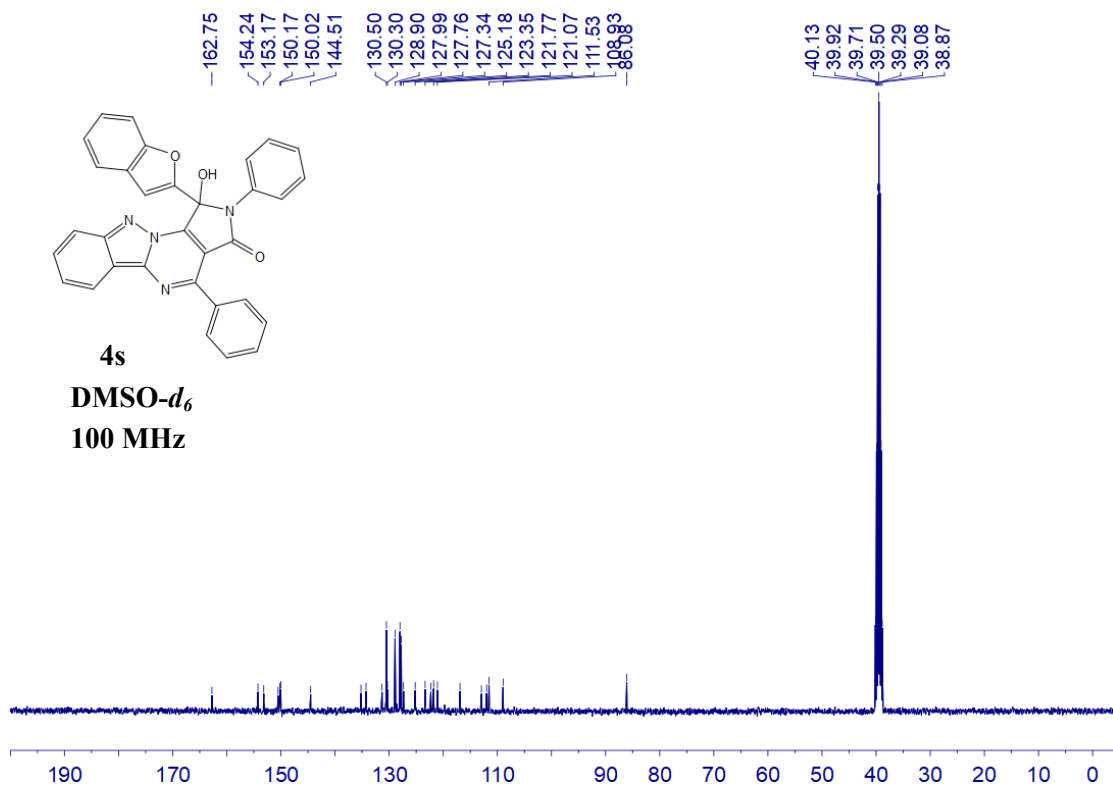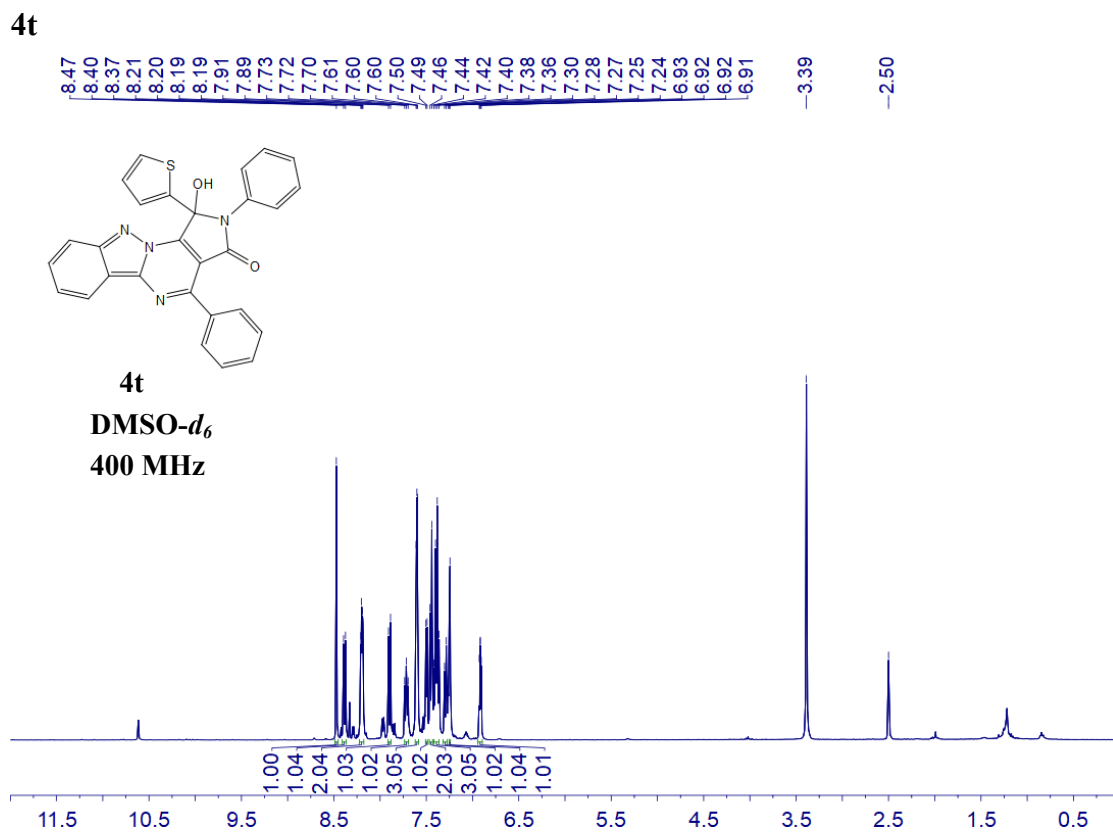

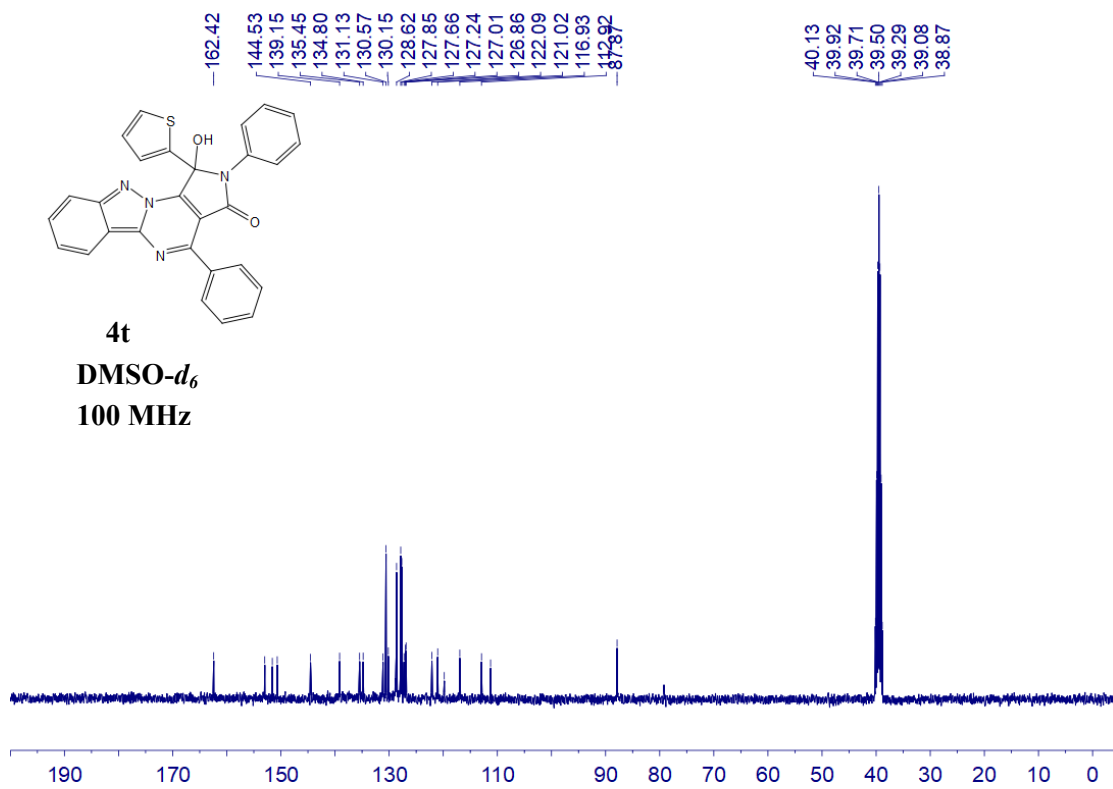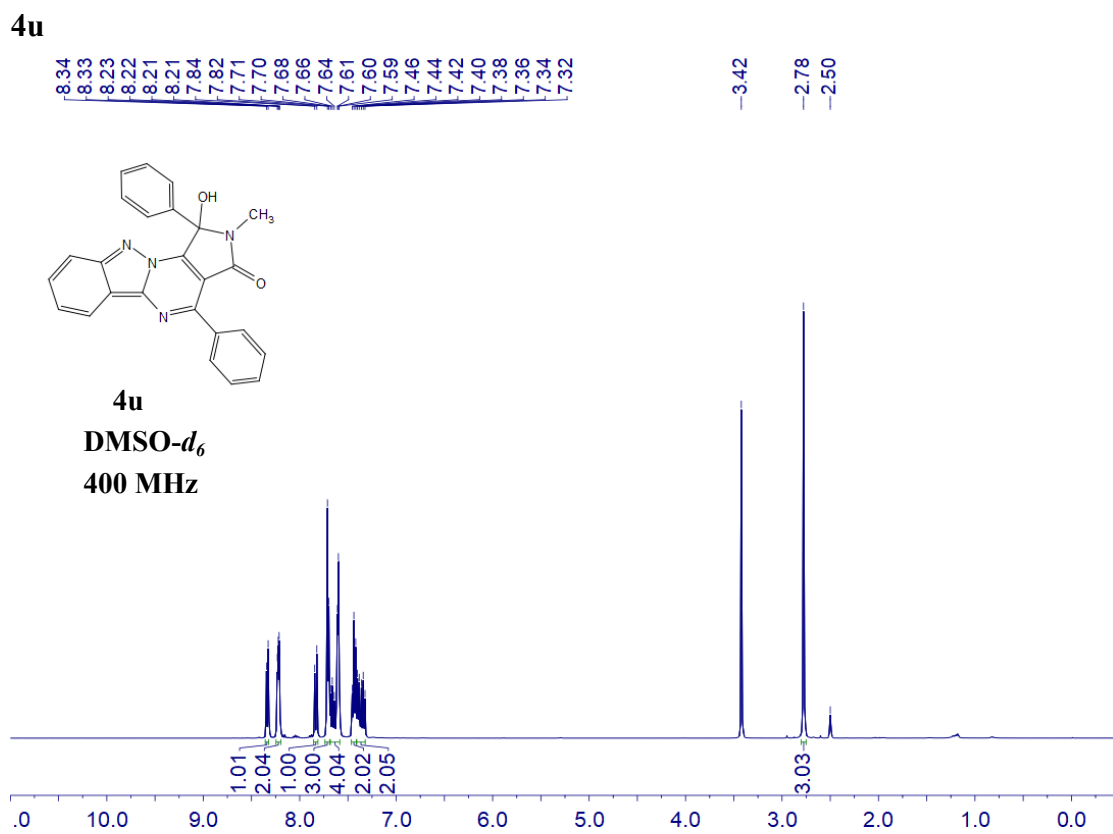

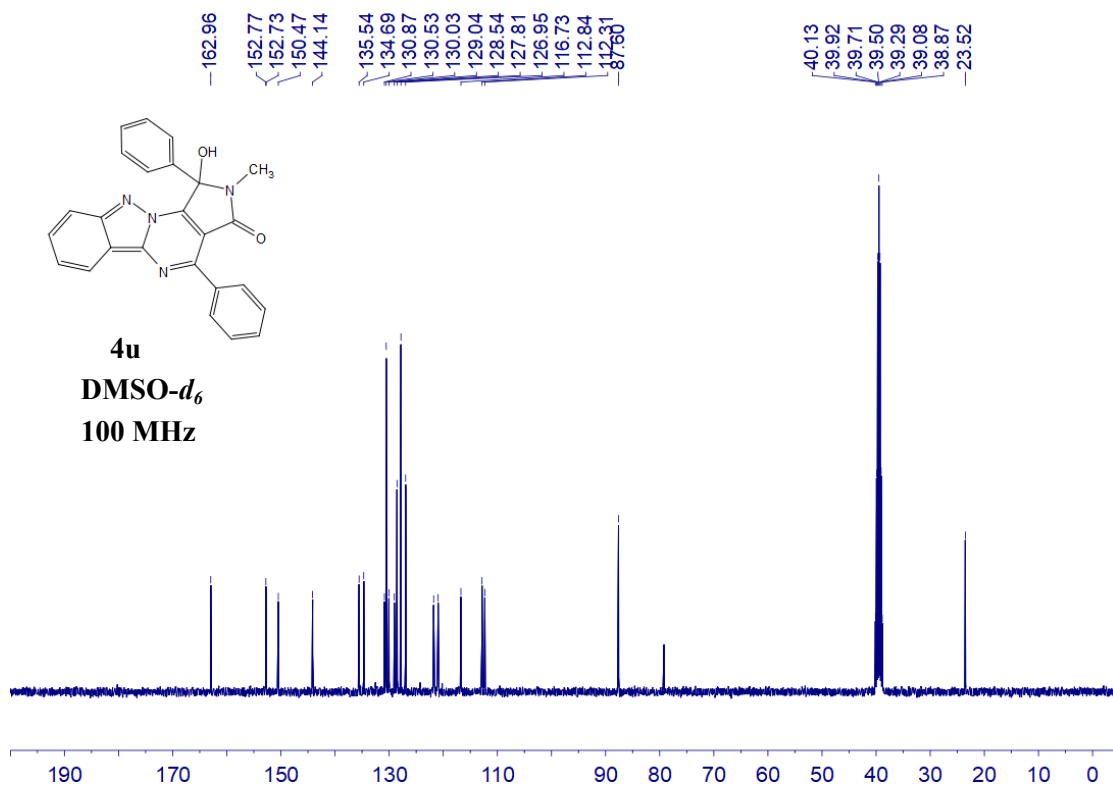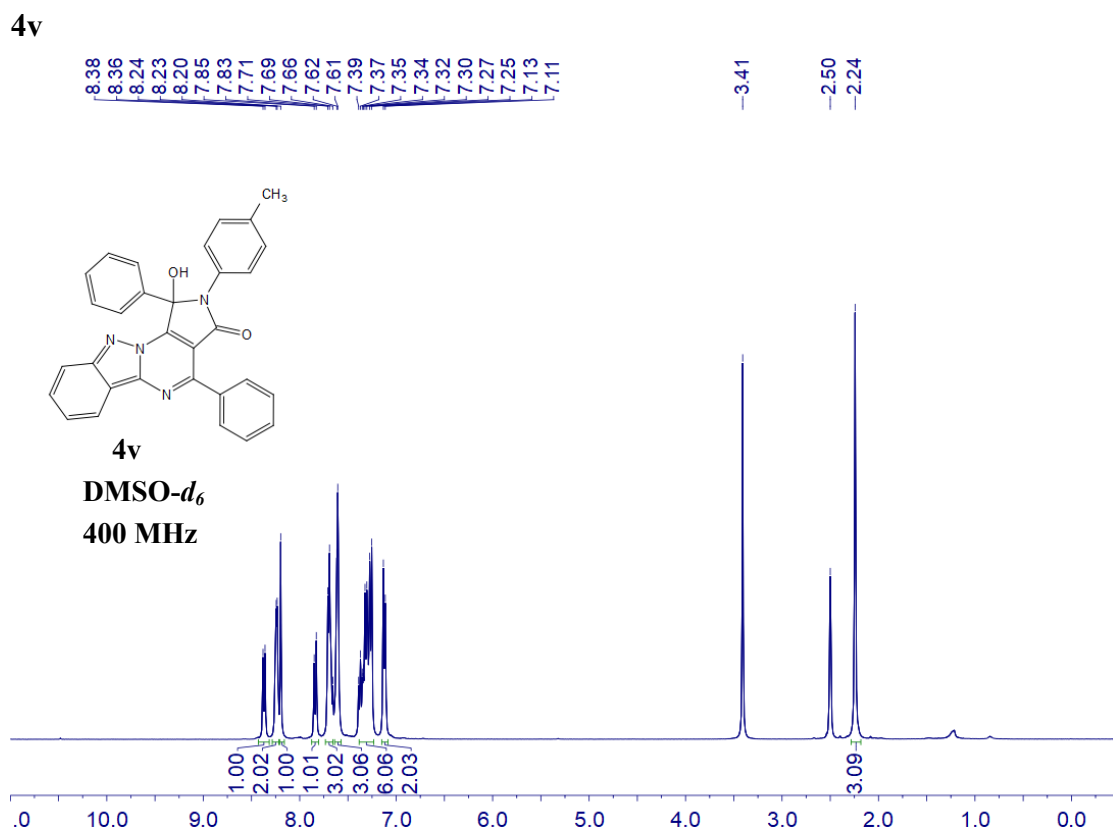

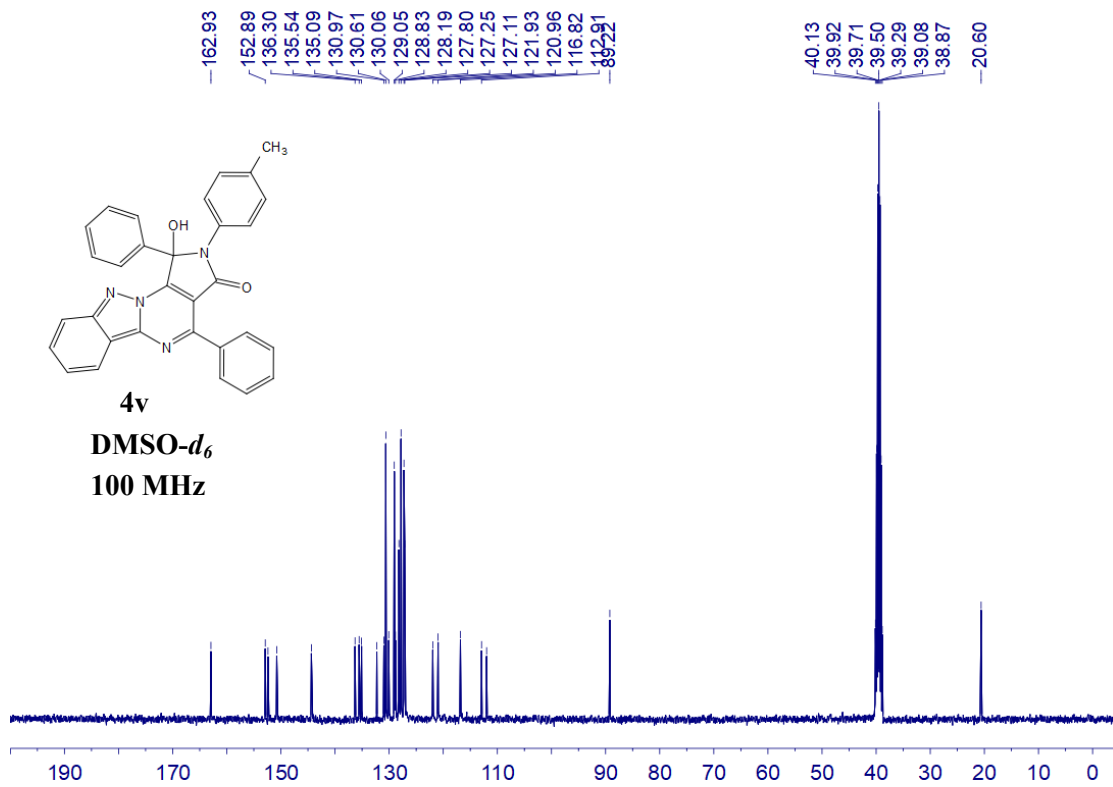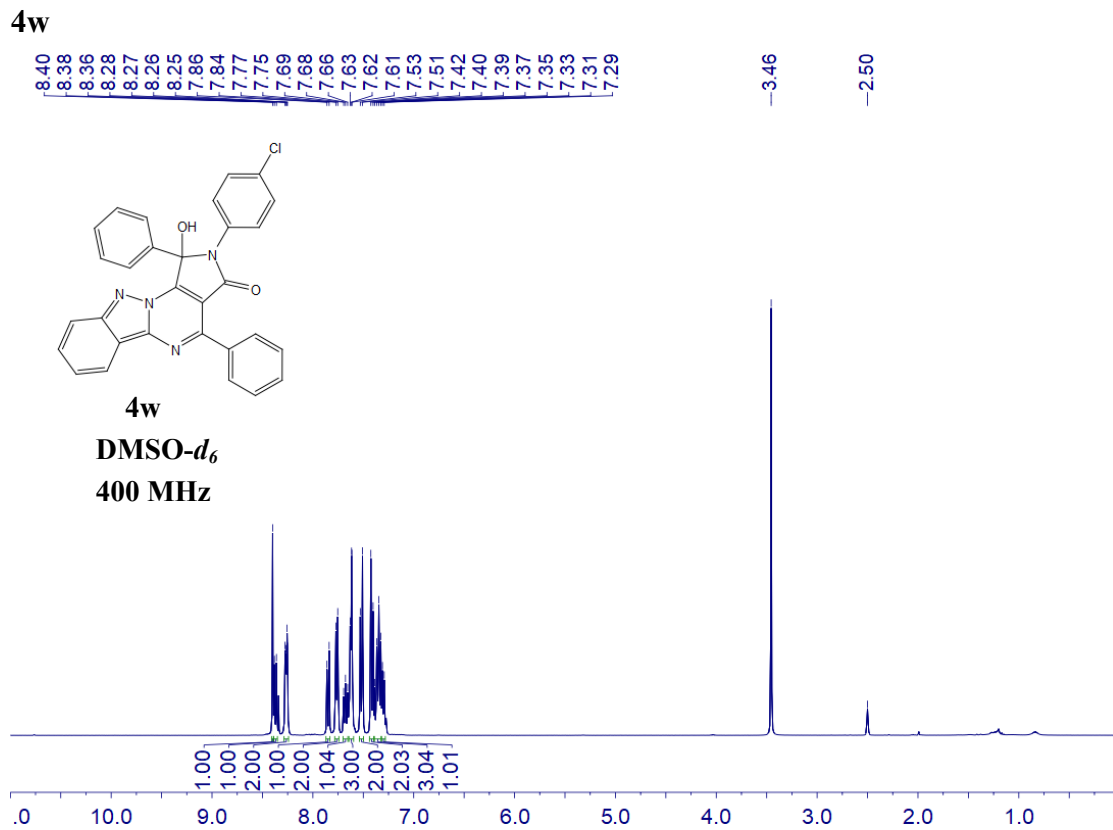

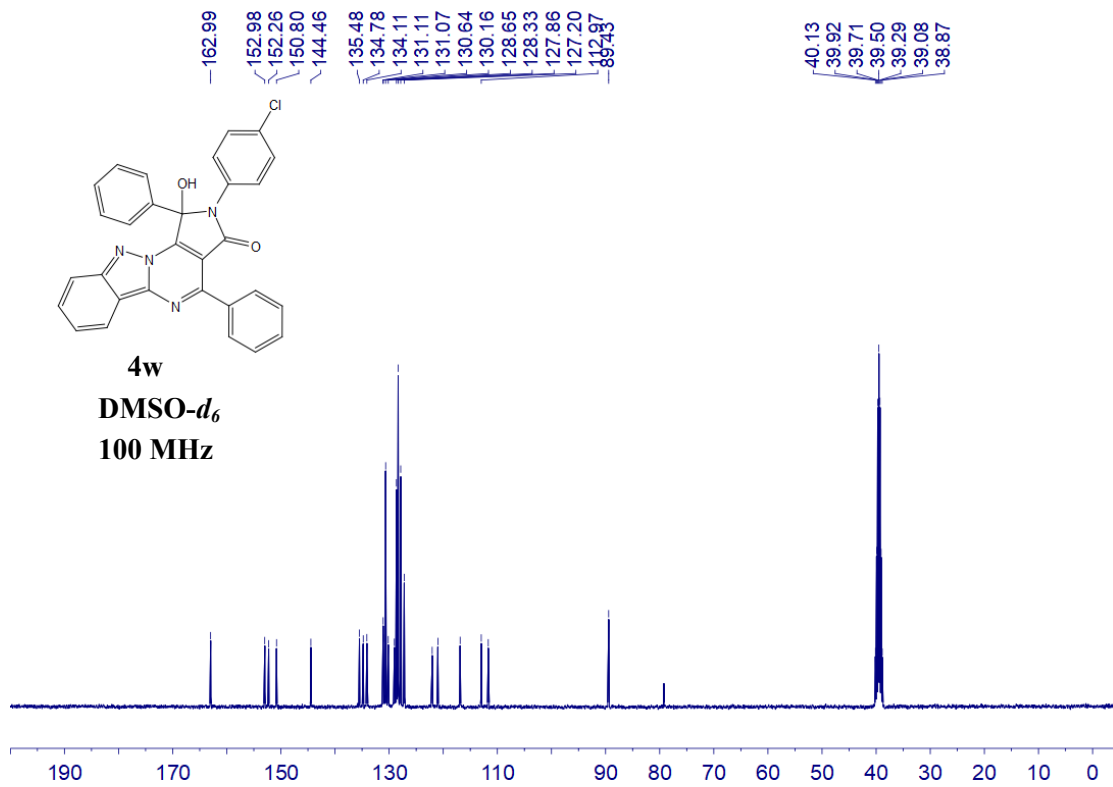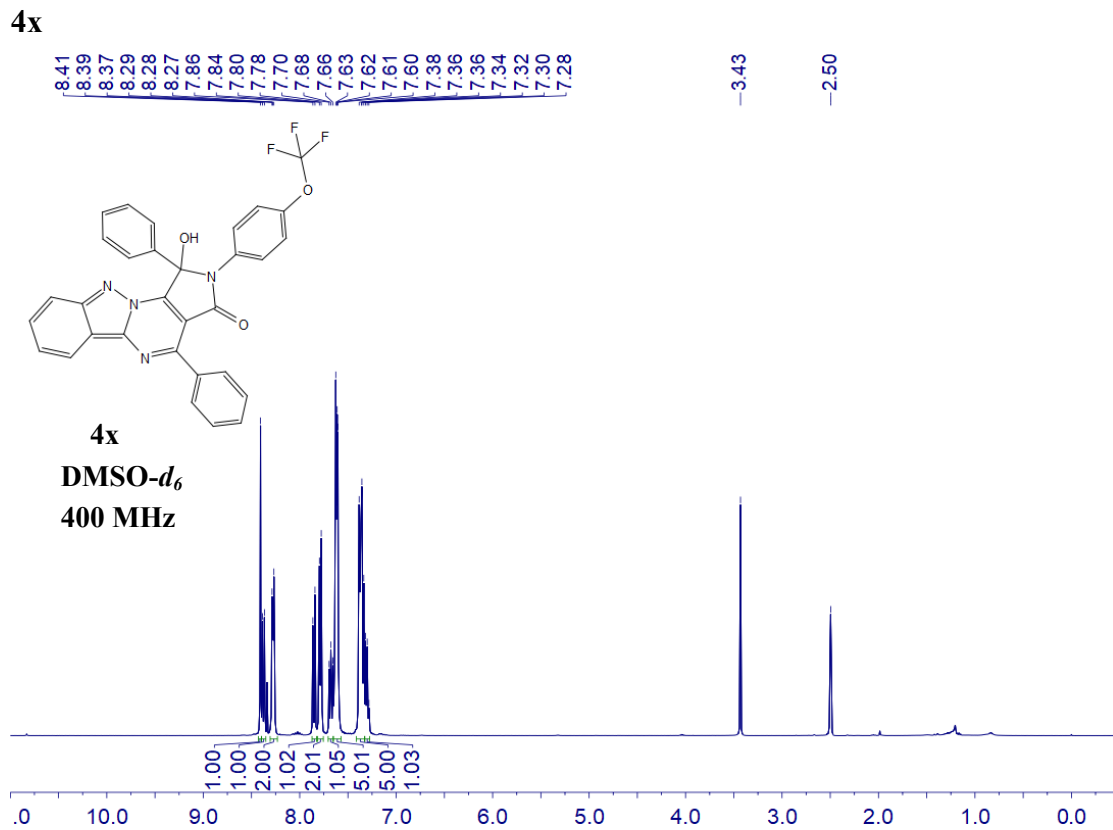

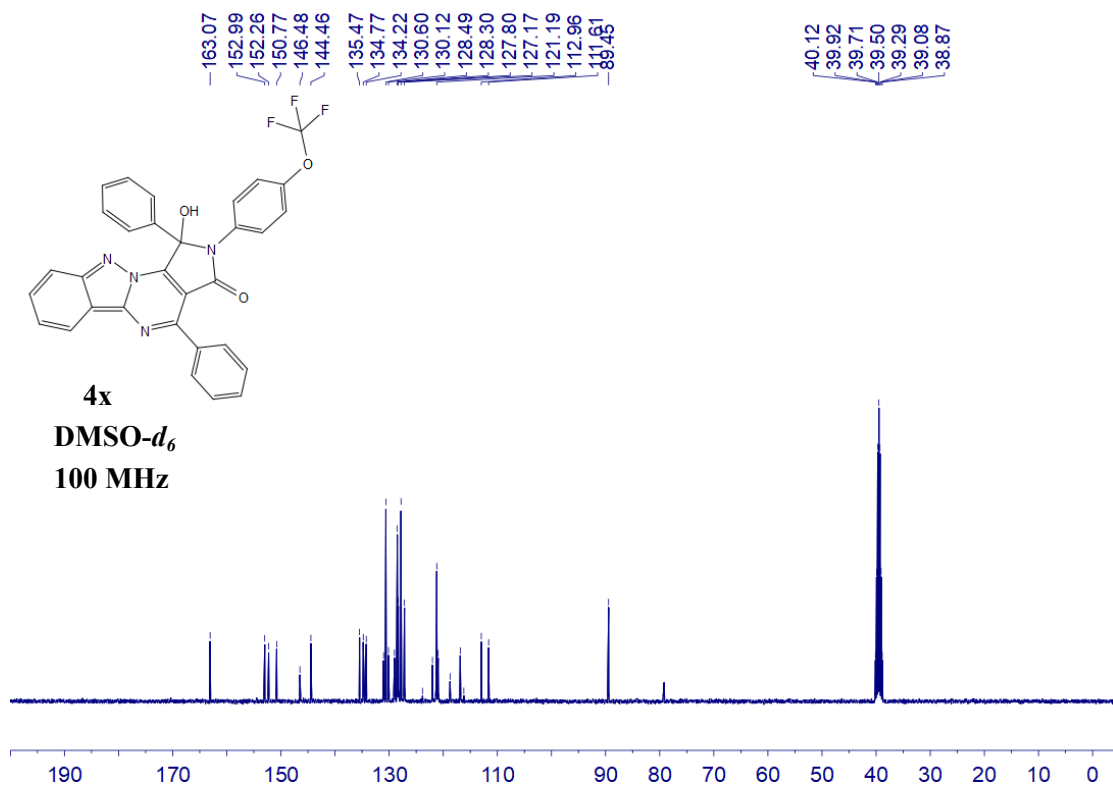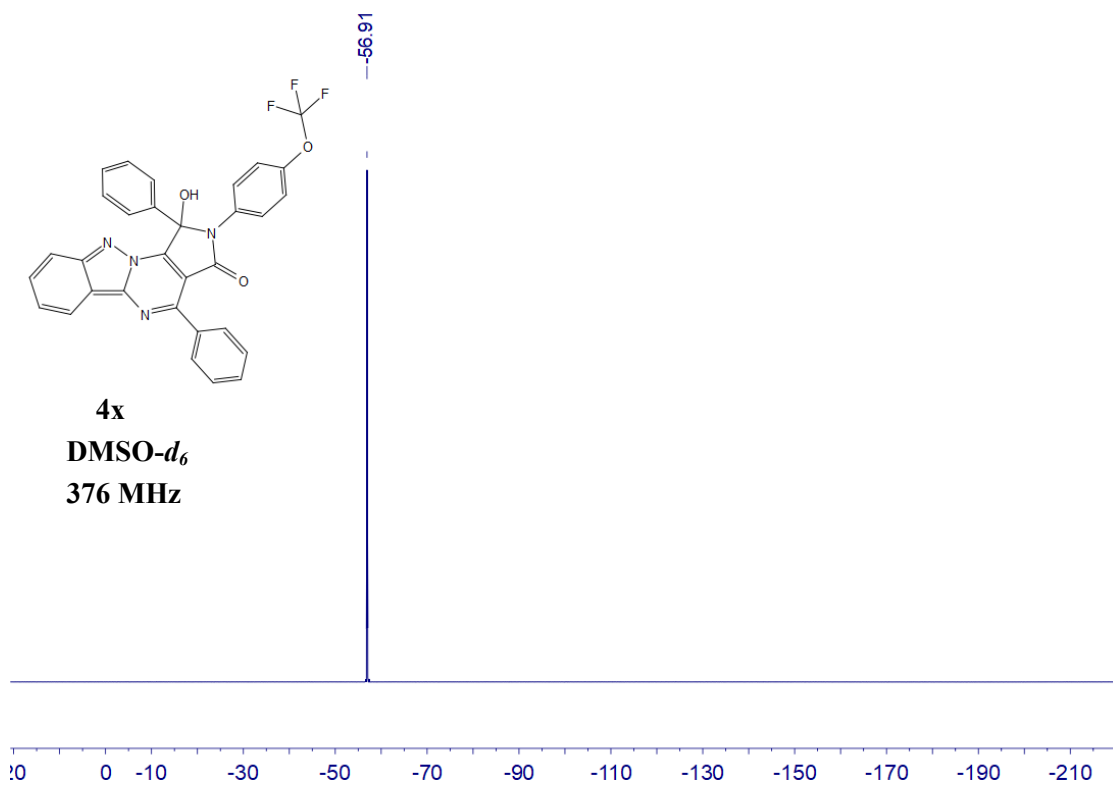

4y

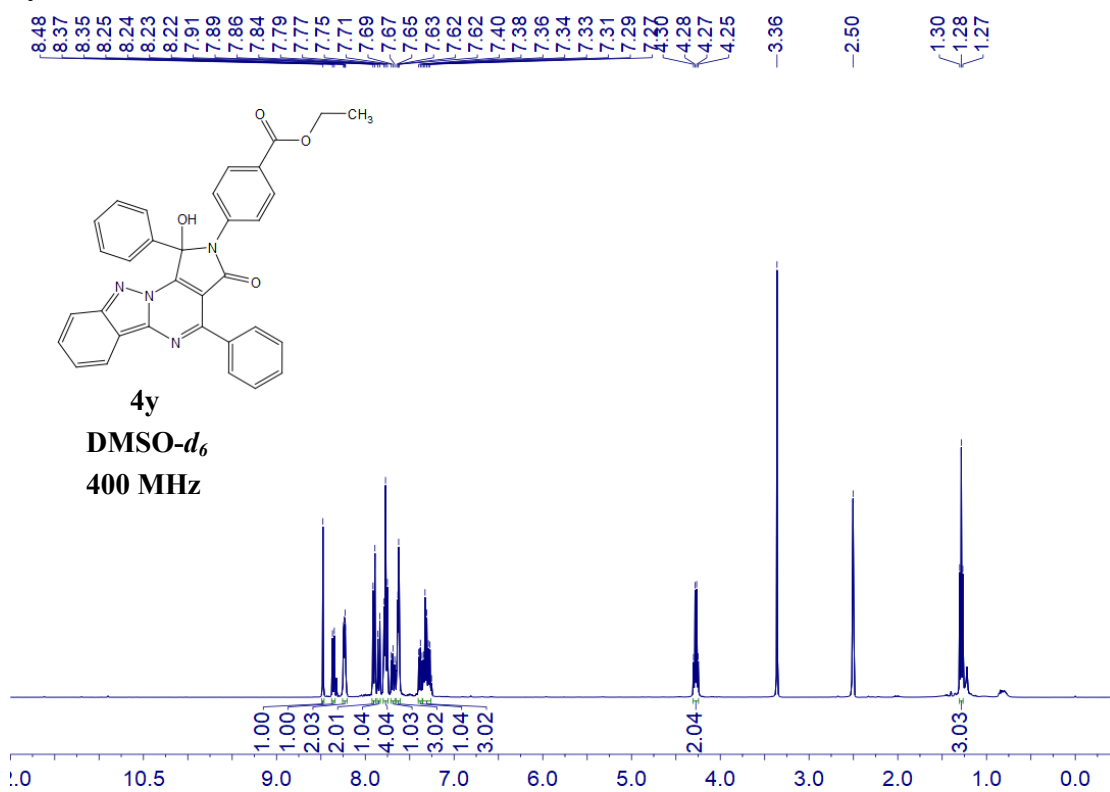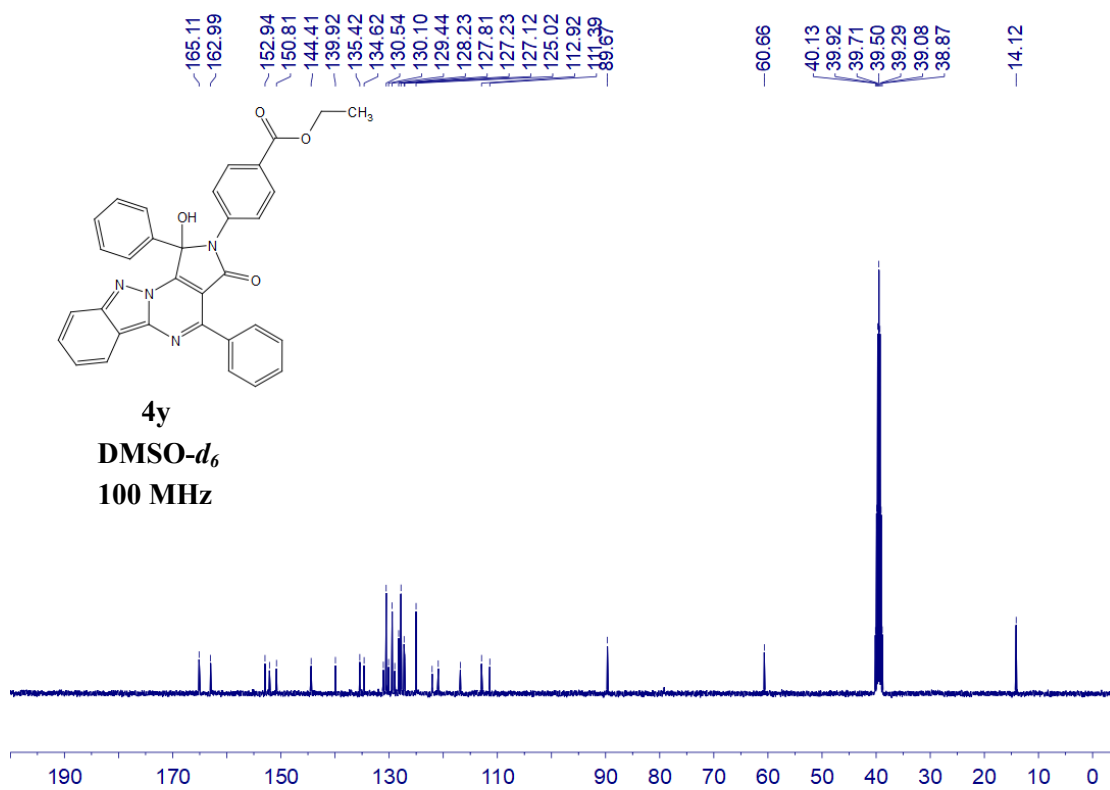



**4z**

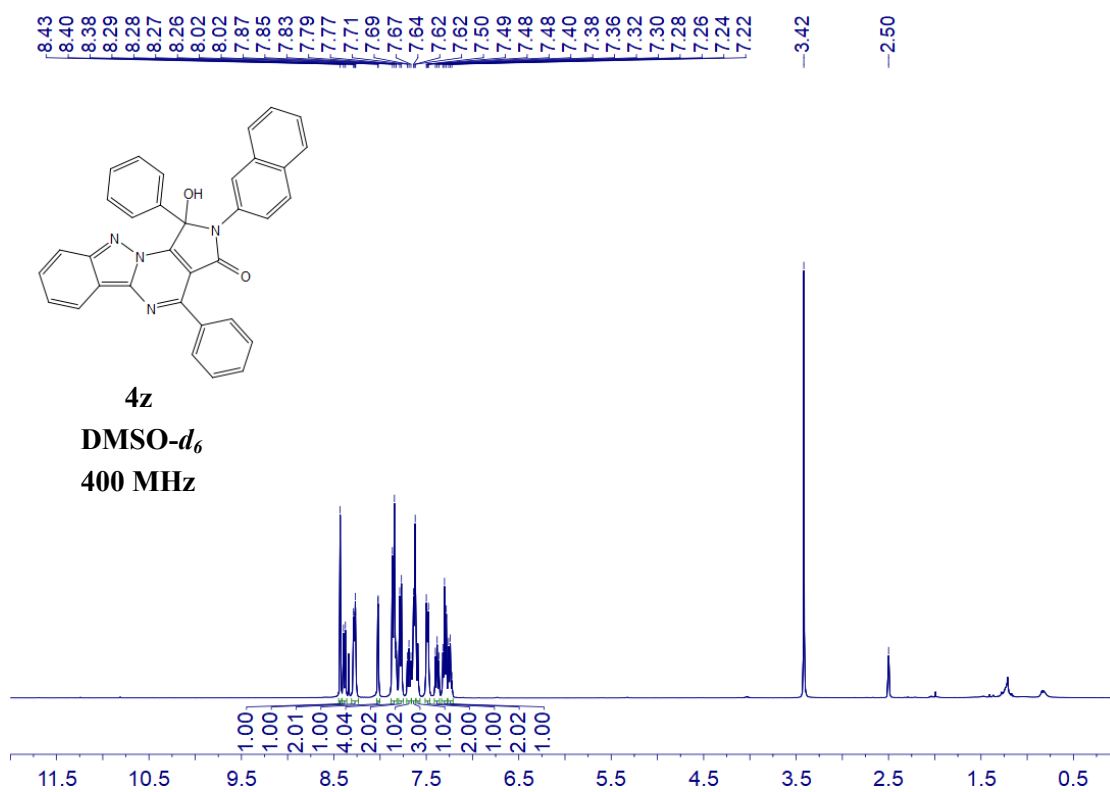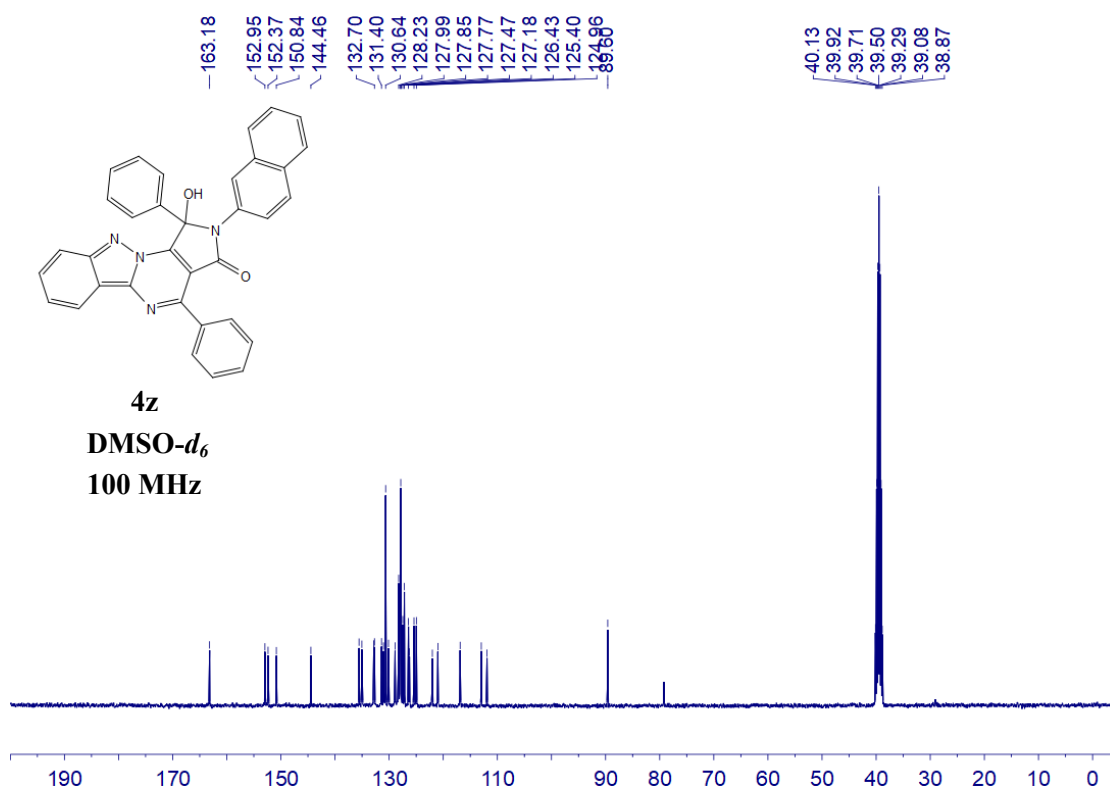

**4aa**

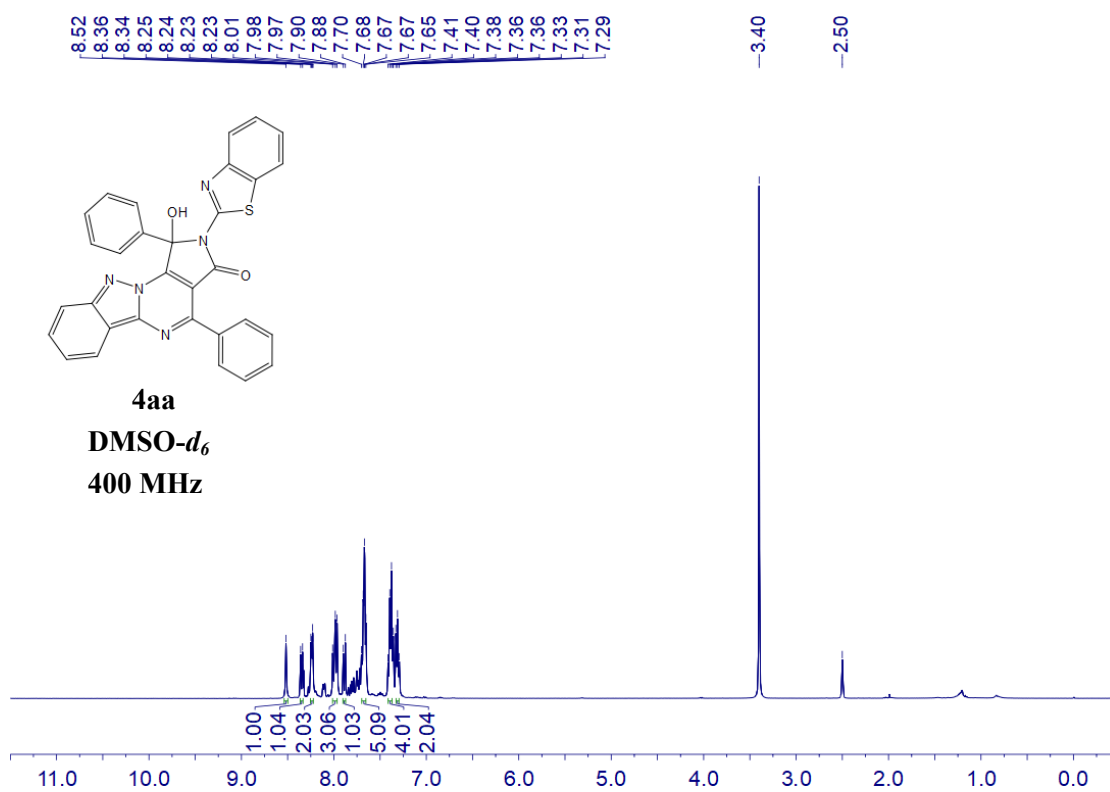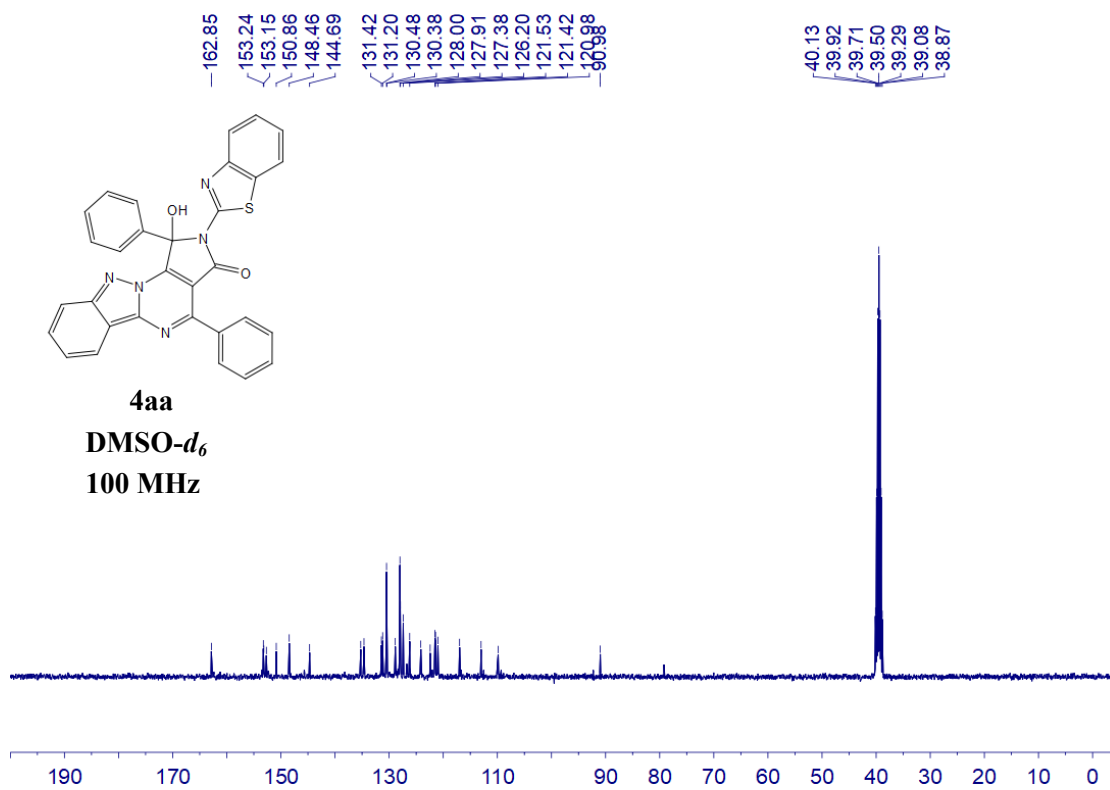

**4ab**

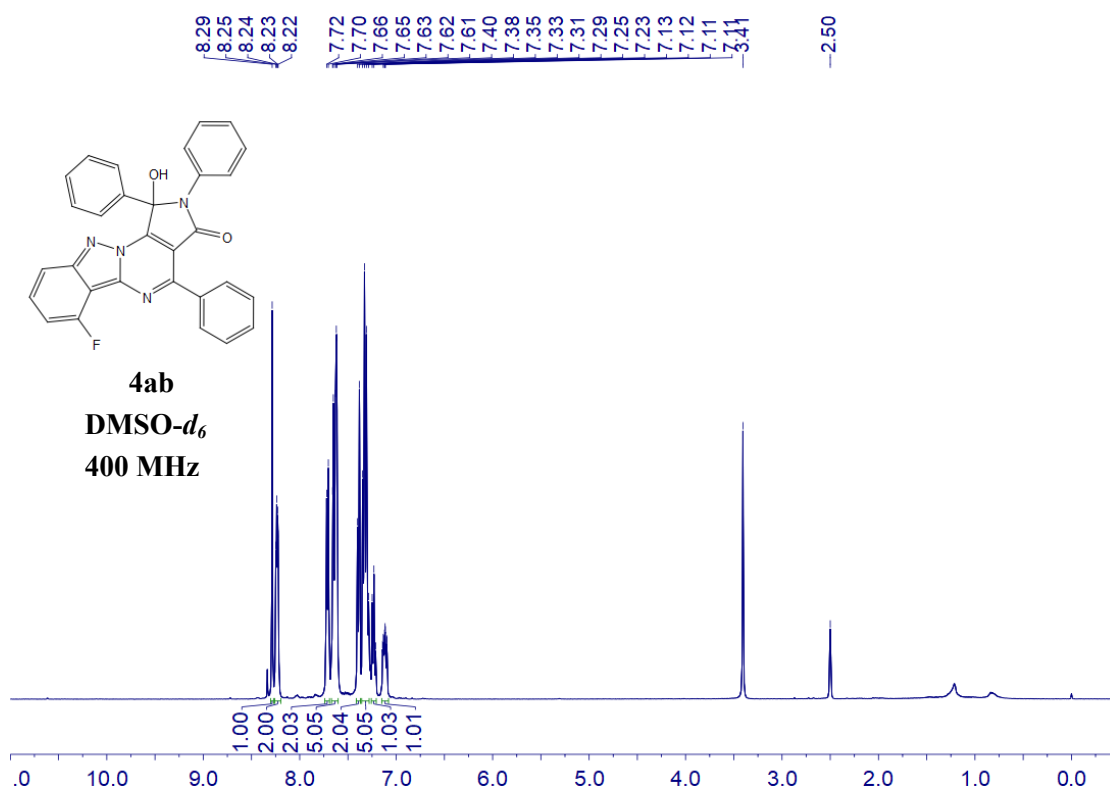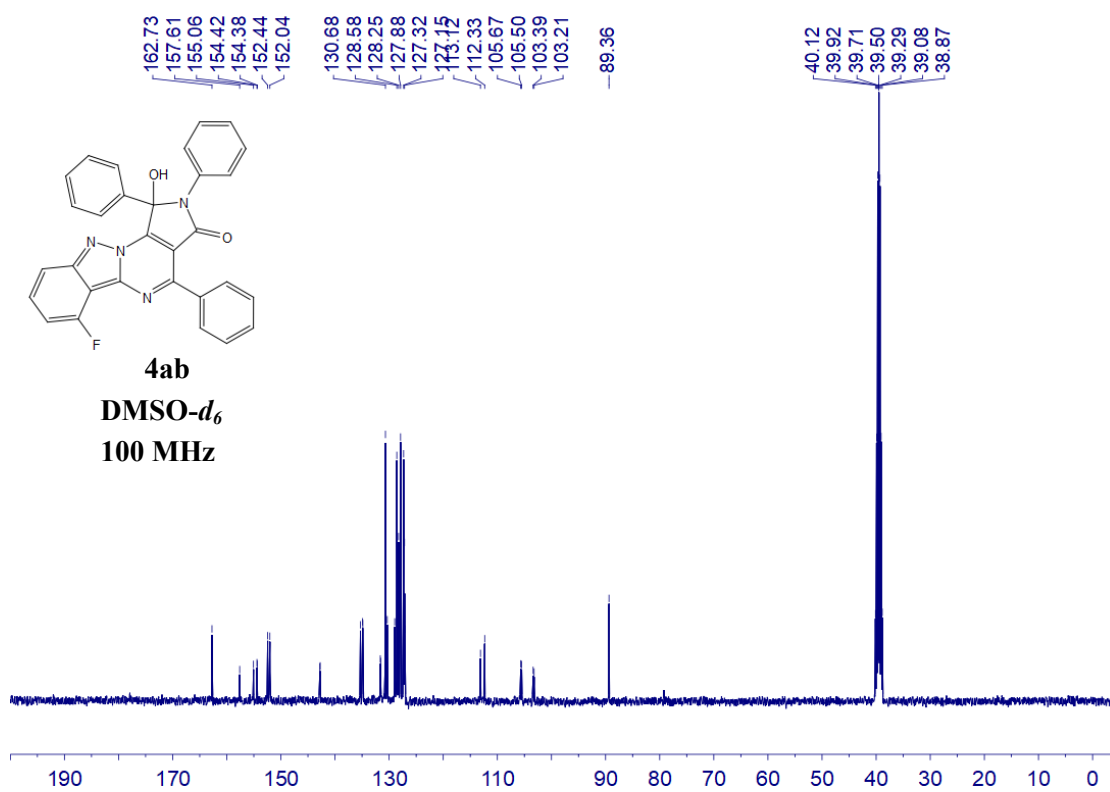

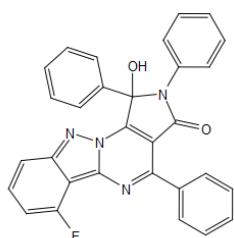

**4ab**  
**DMSO-*d*<sub>6</sub>**  
**376 MHz**

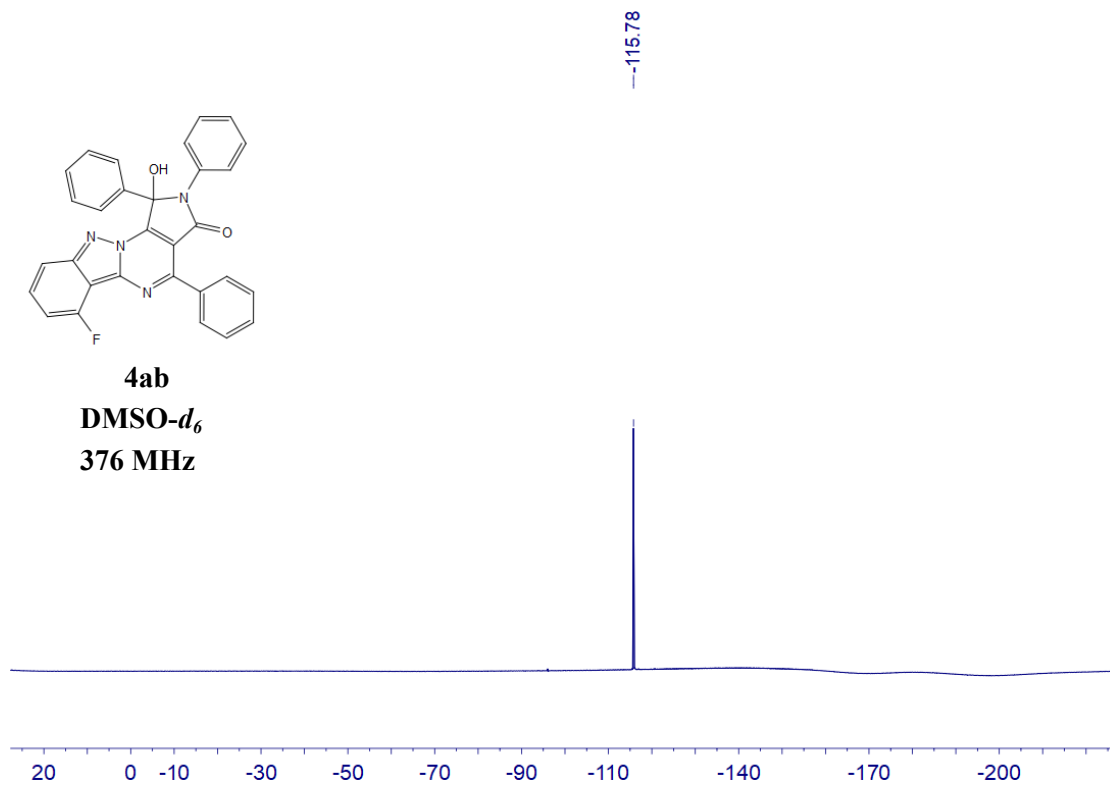

**4ac**

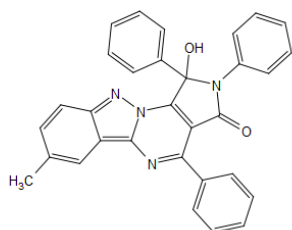

**4ac**  
**DMSO-*d*<sub>6</sub>**  
**400 MHz**

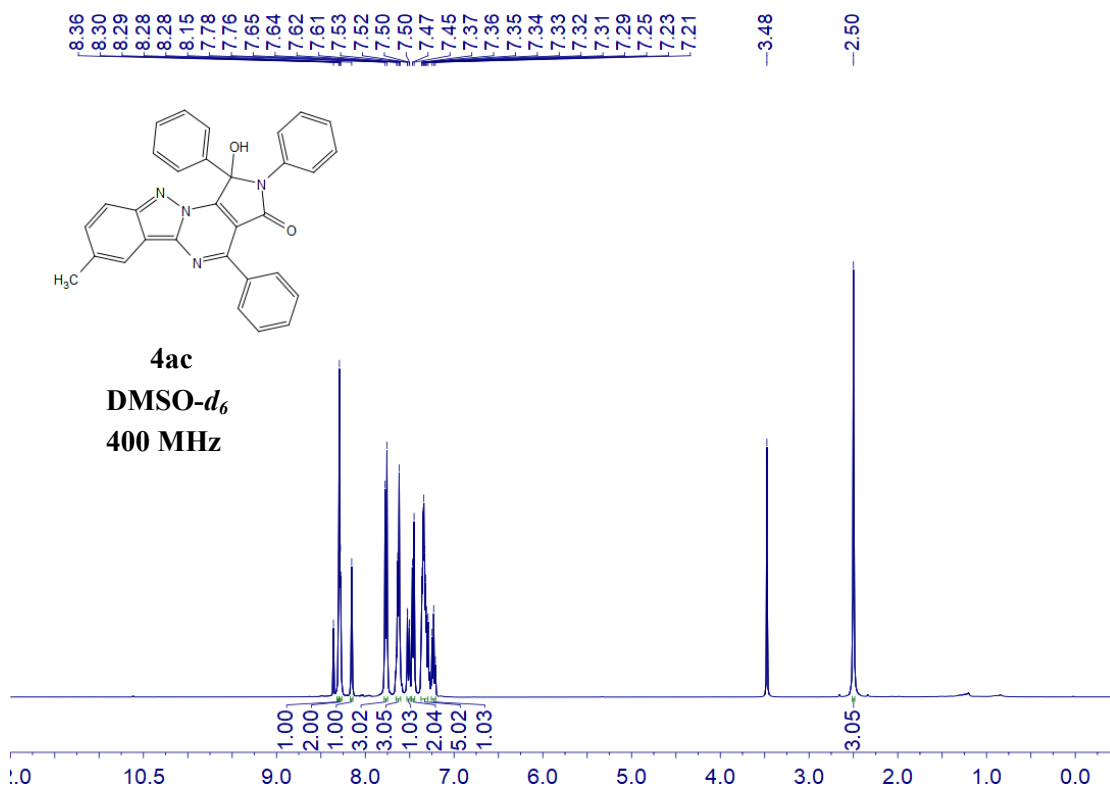

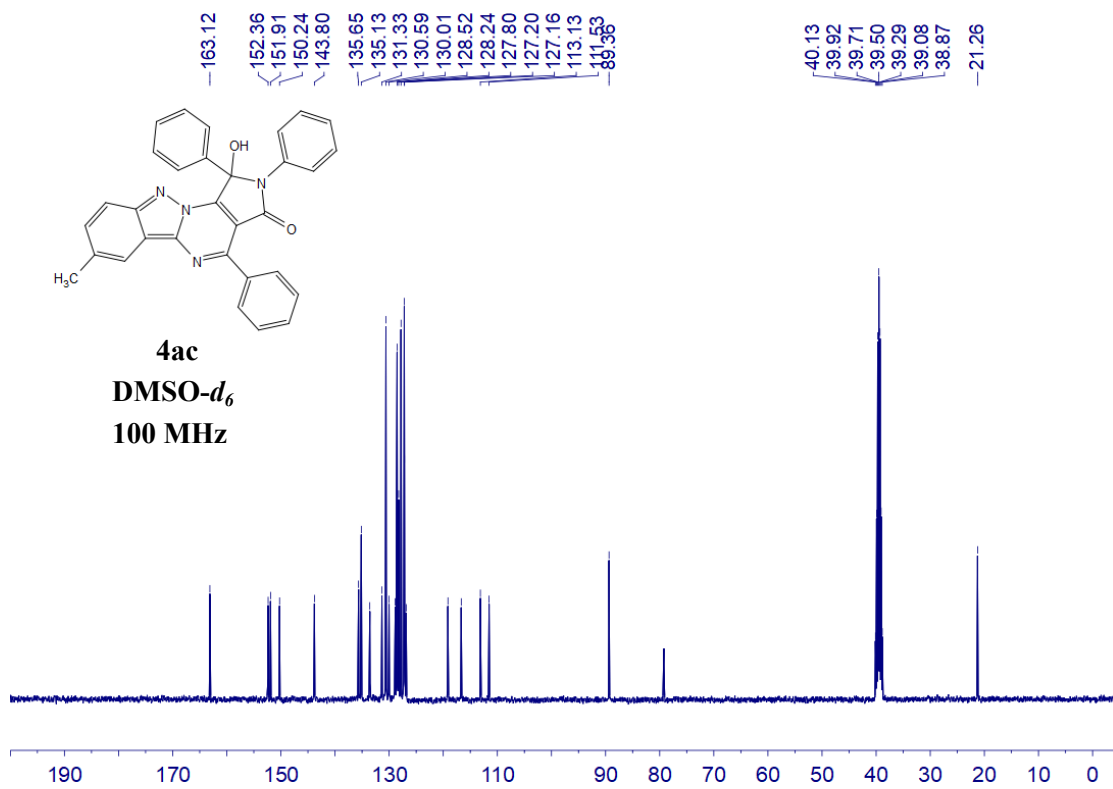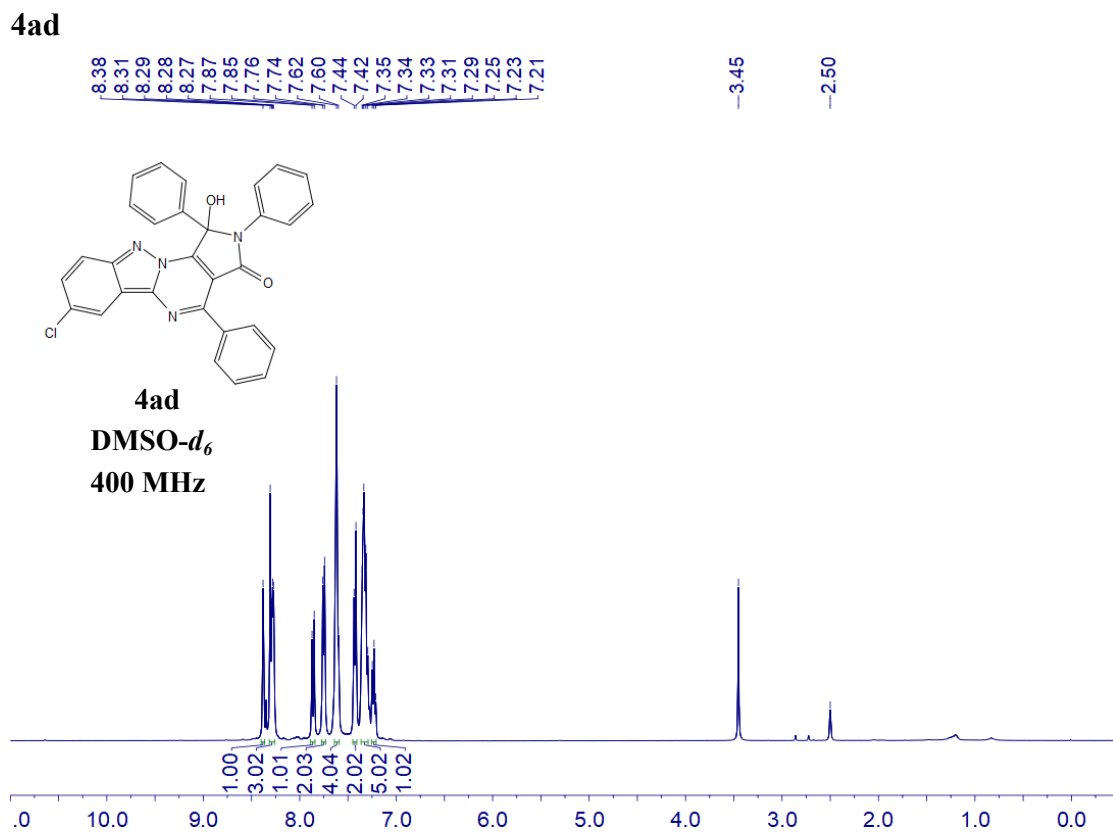

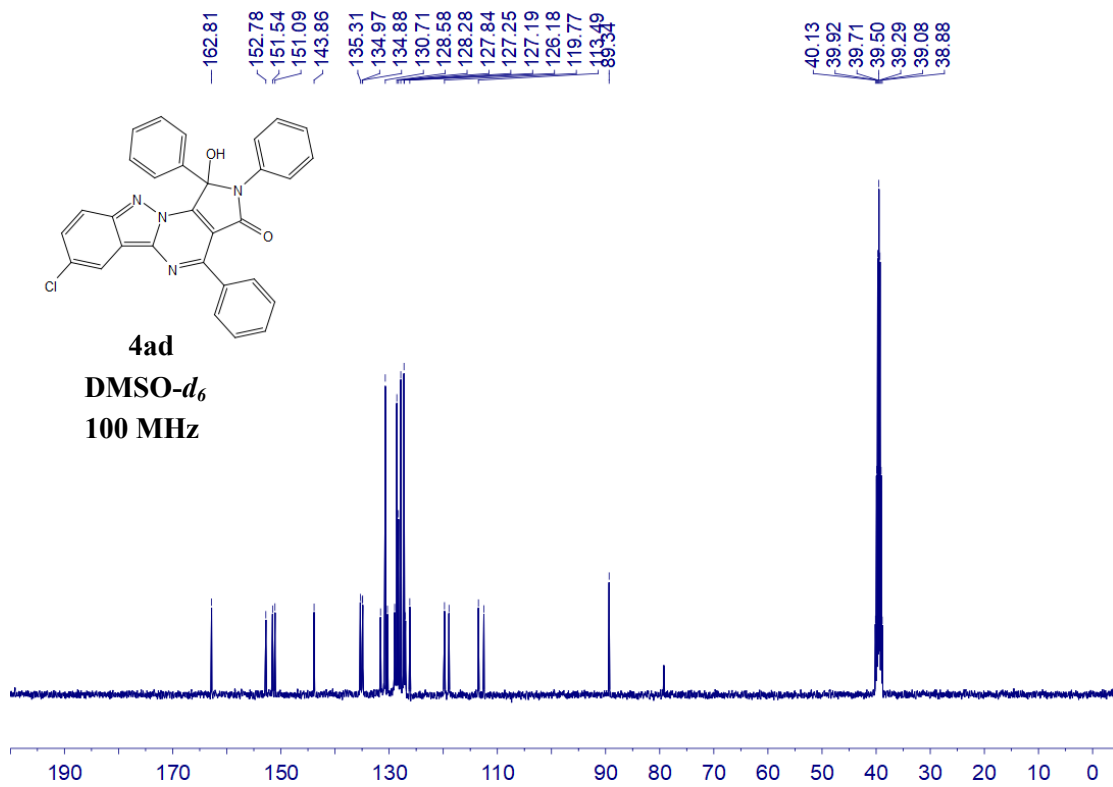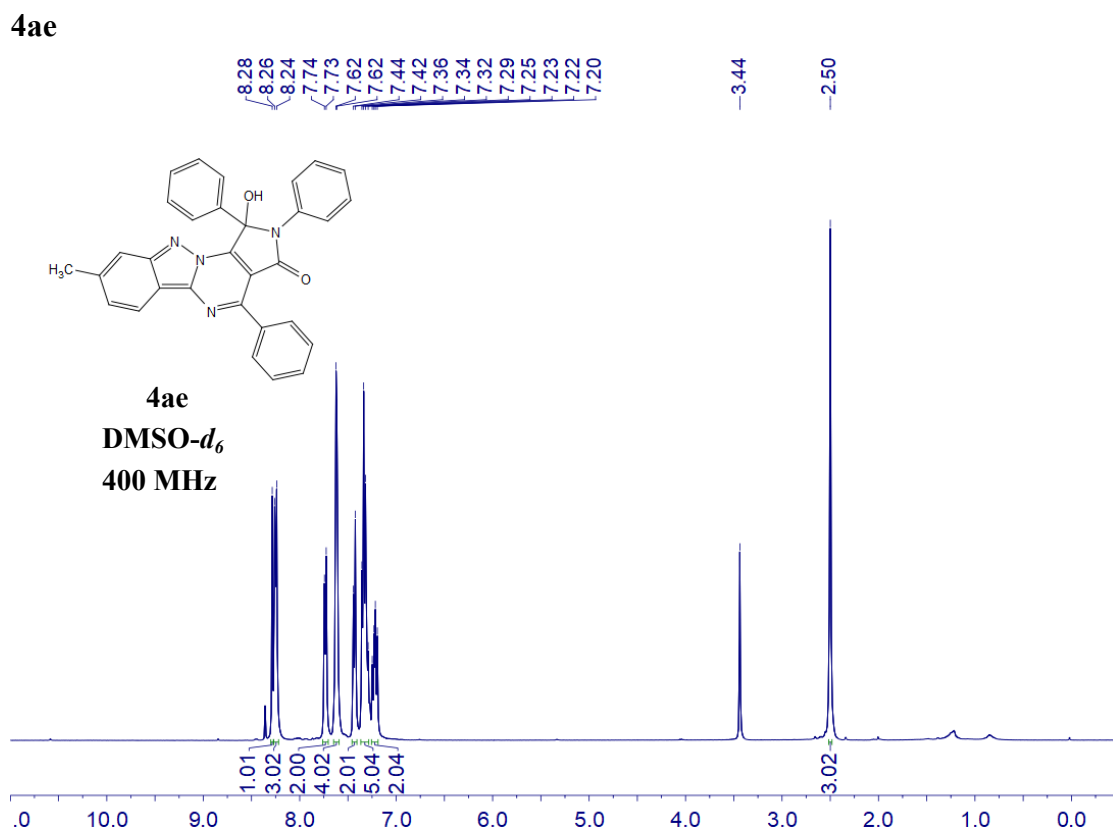

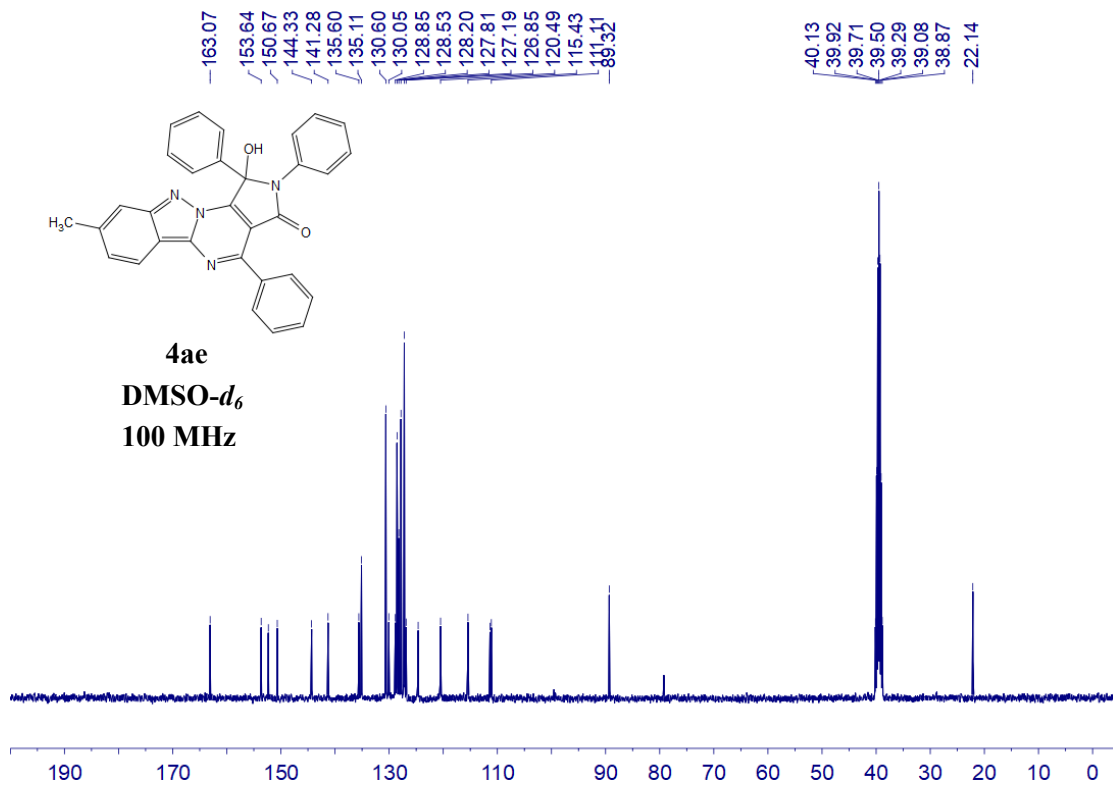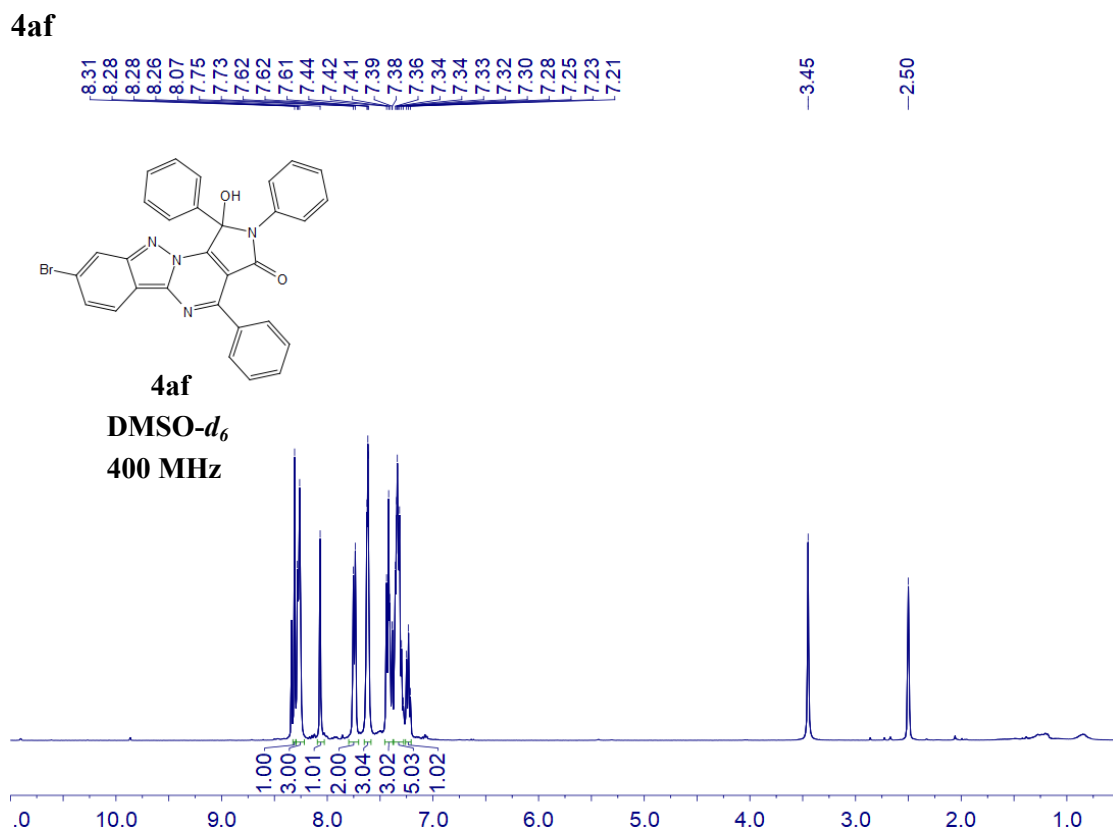

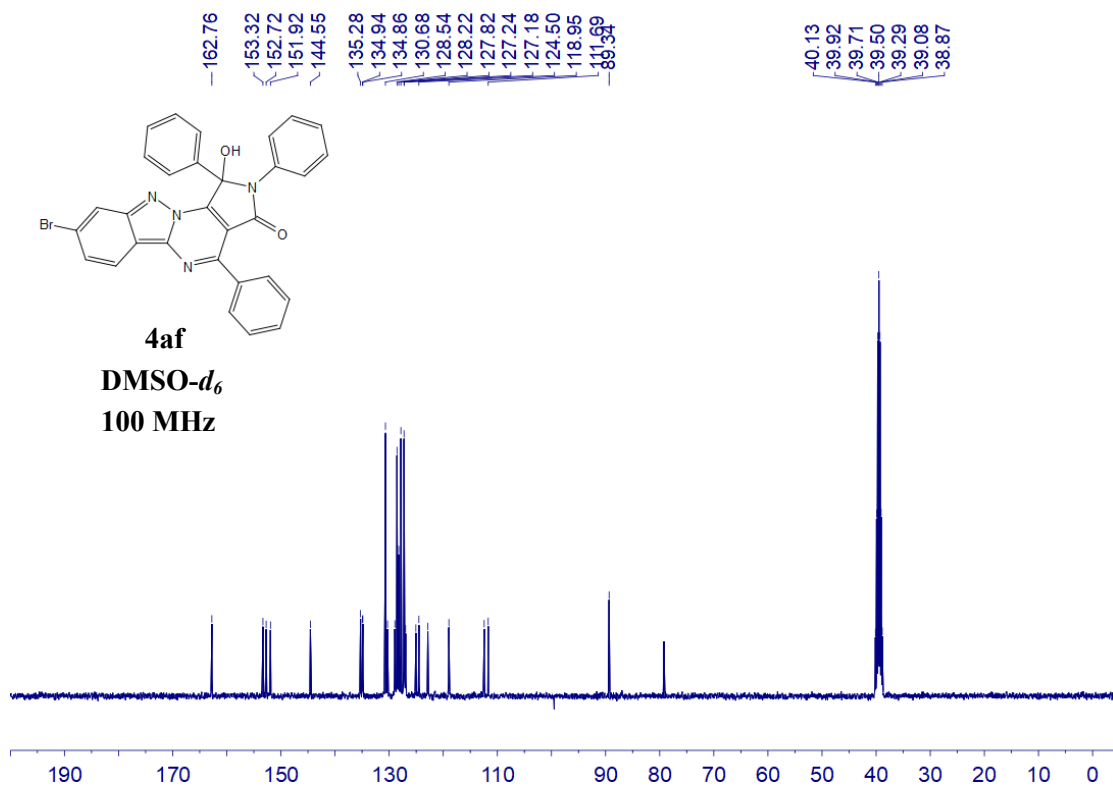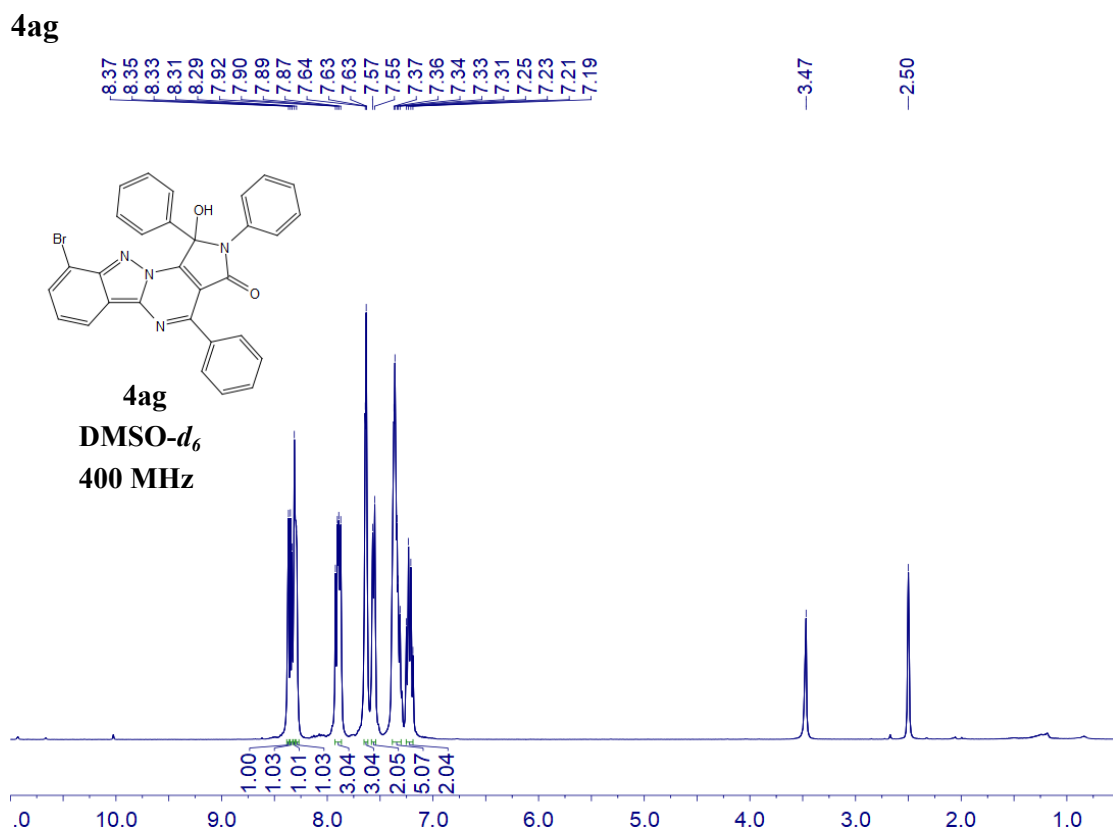



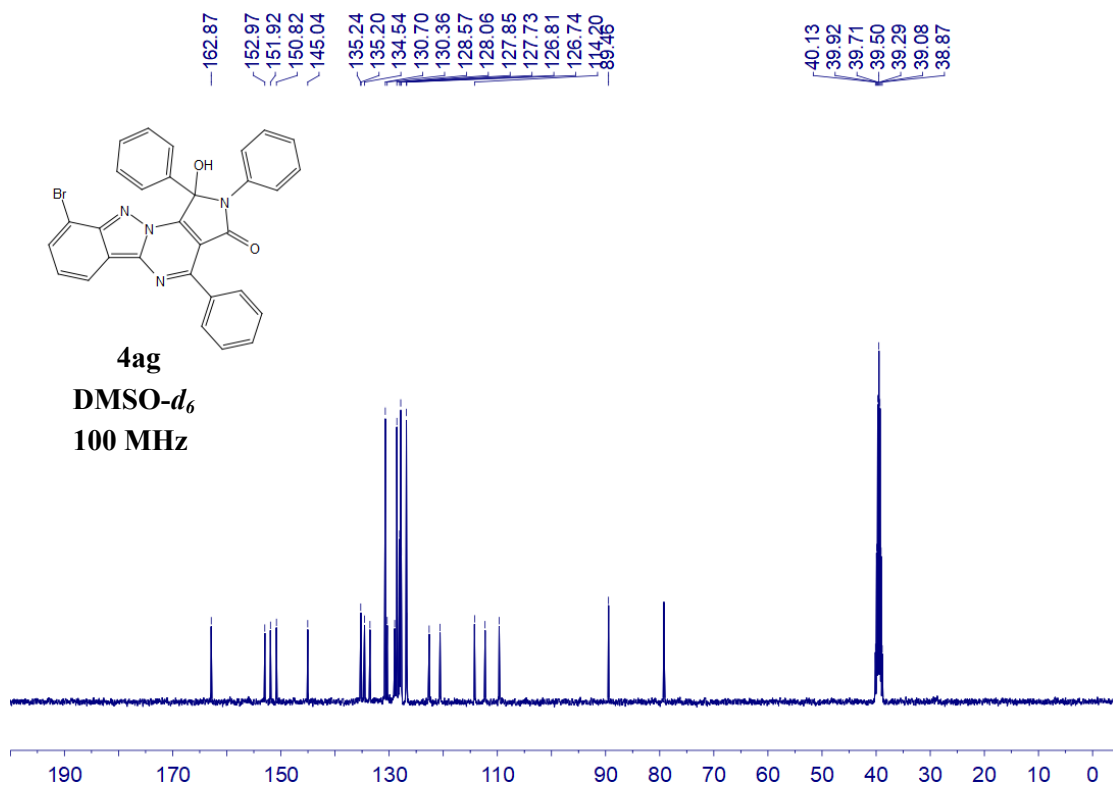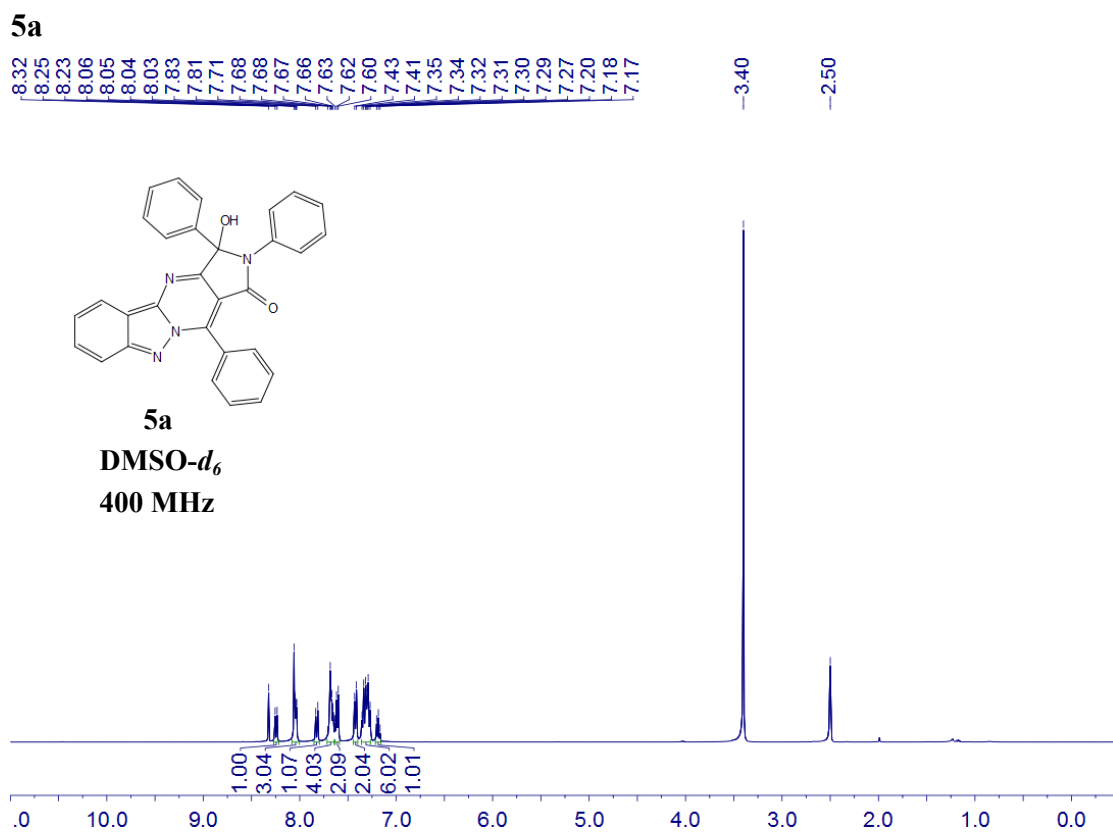

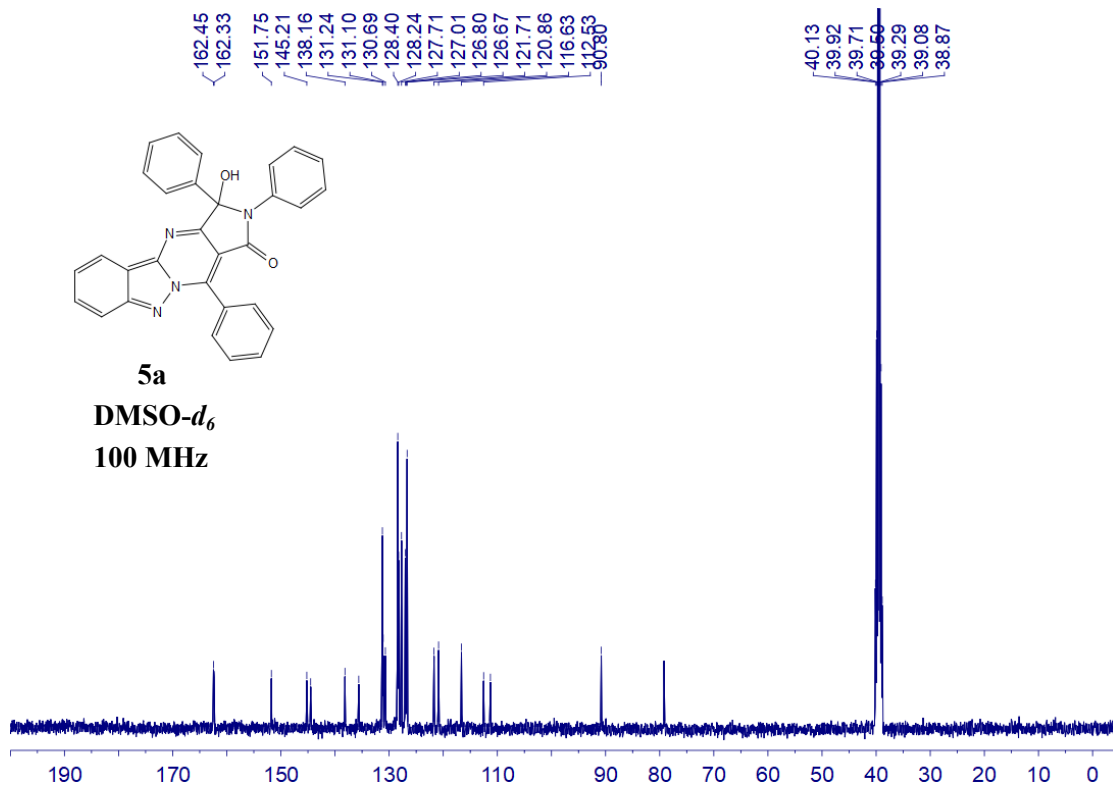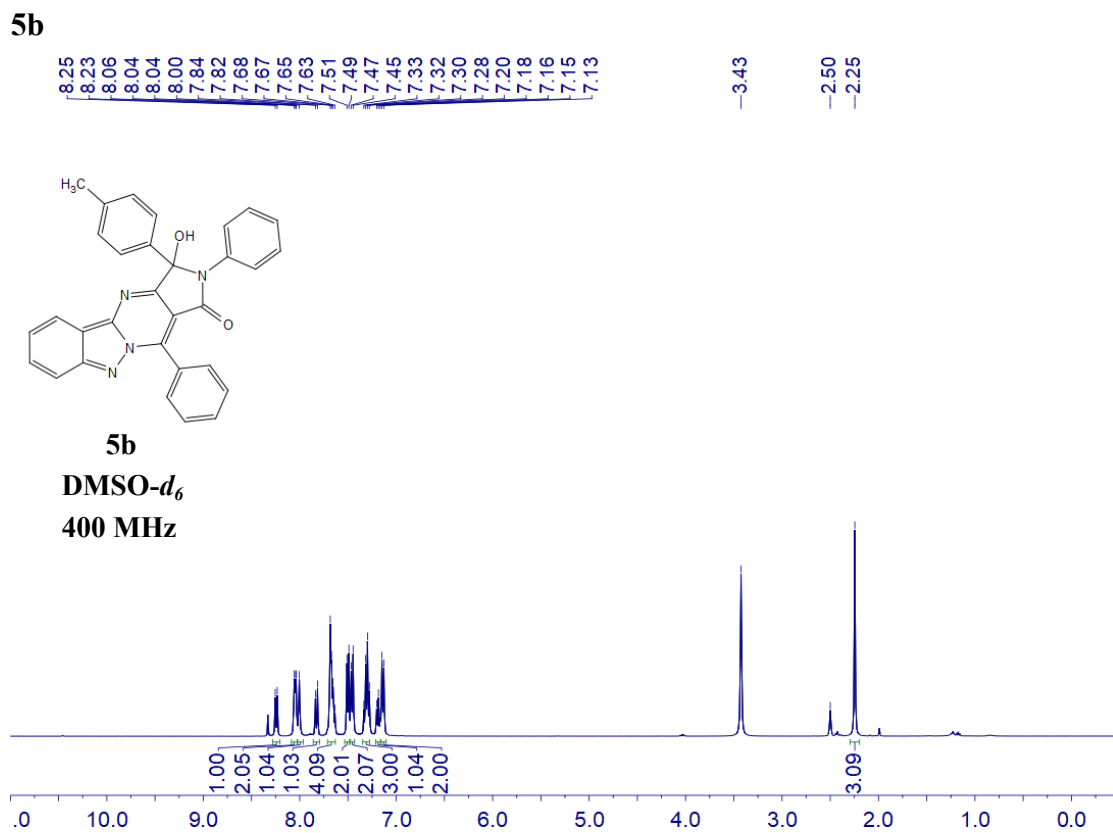

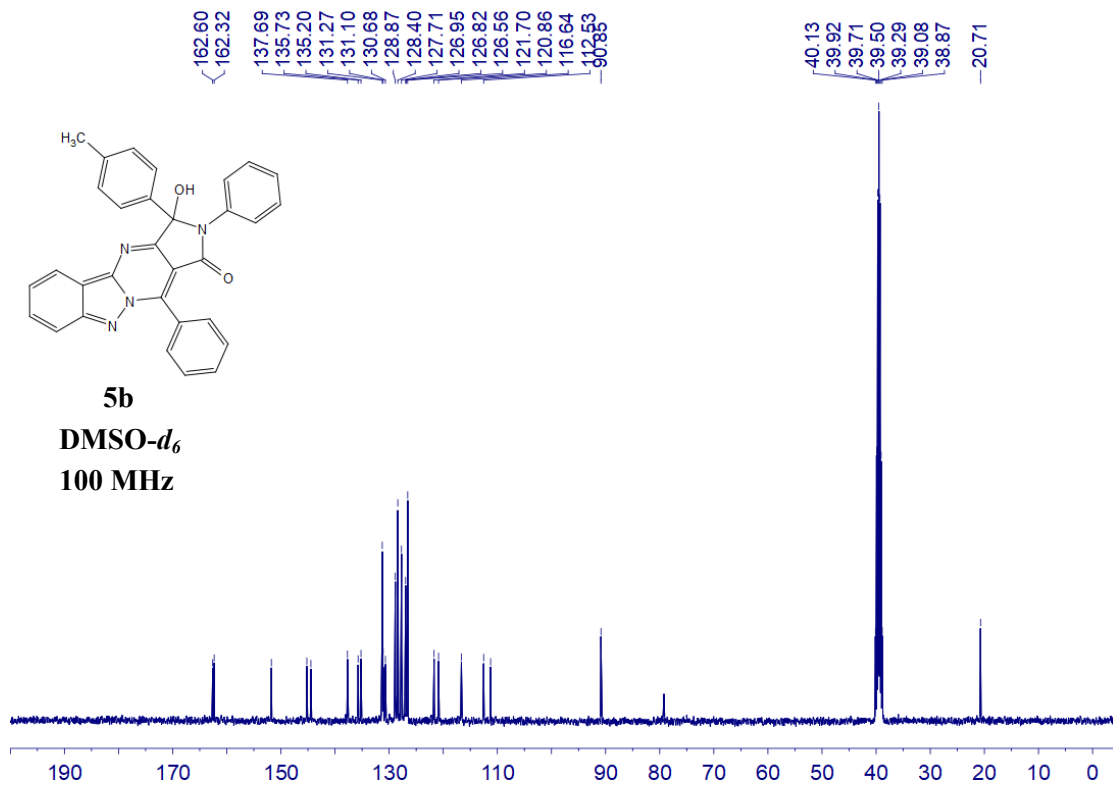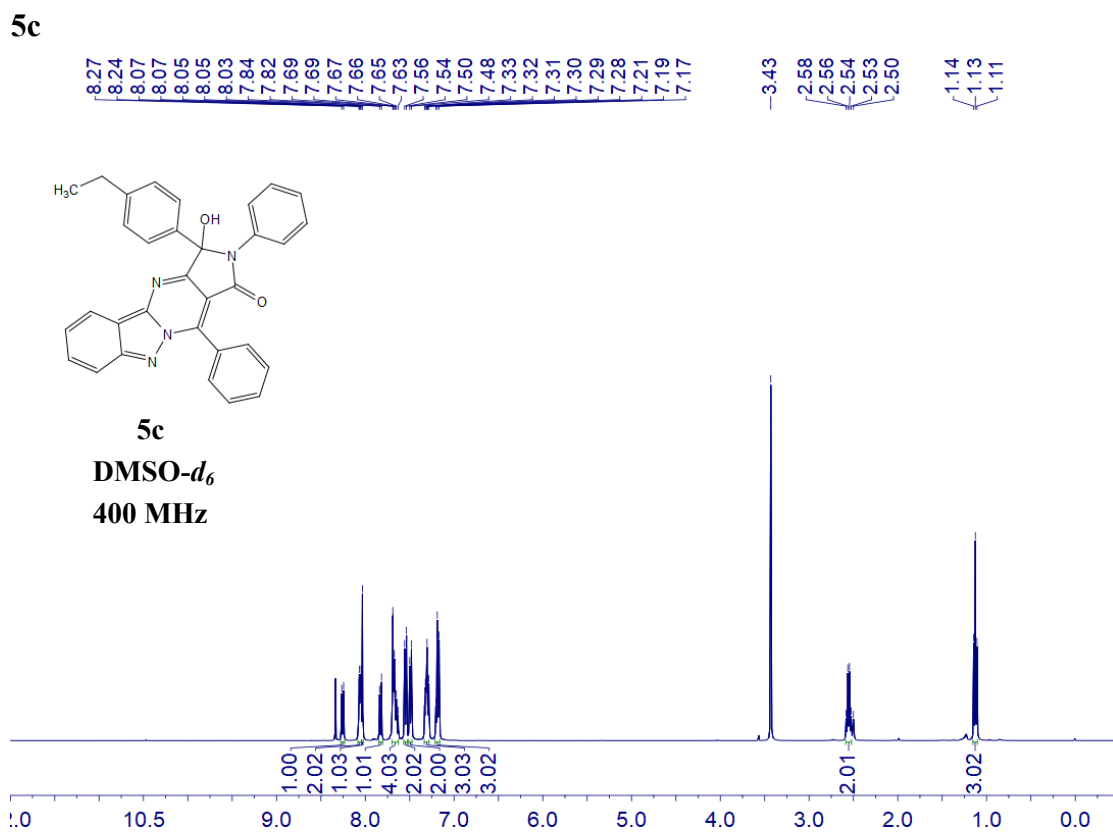

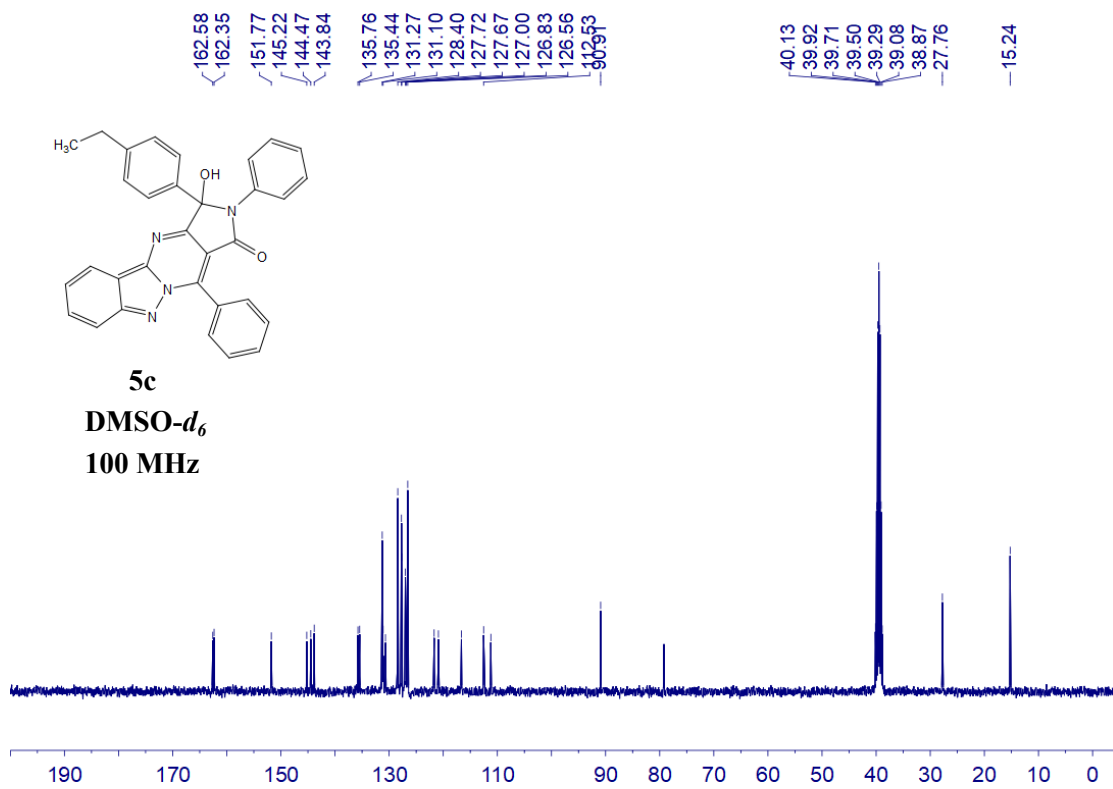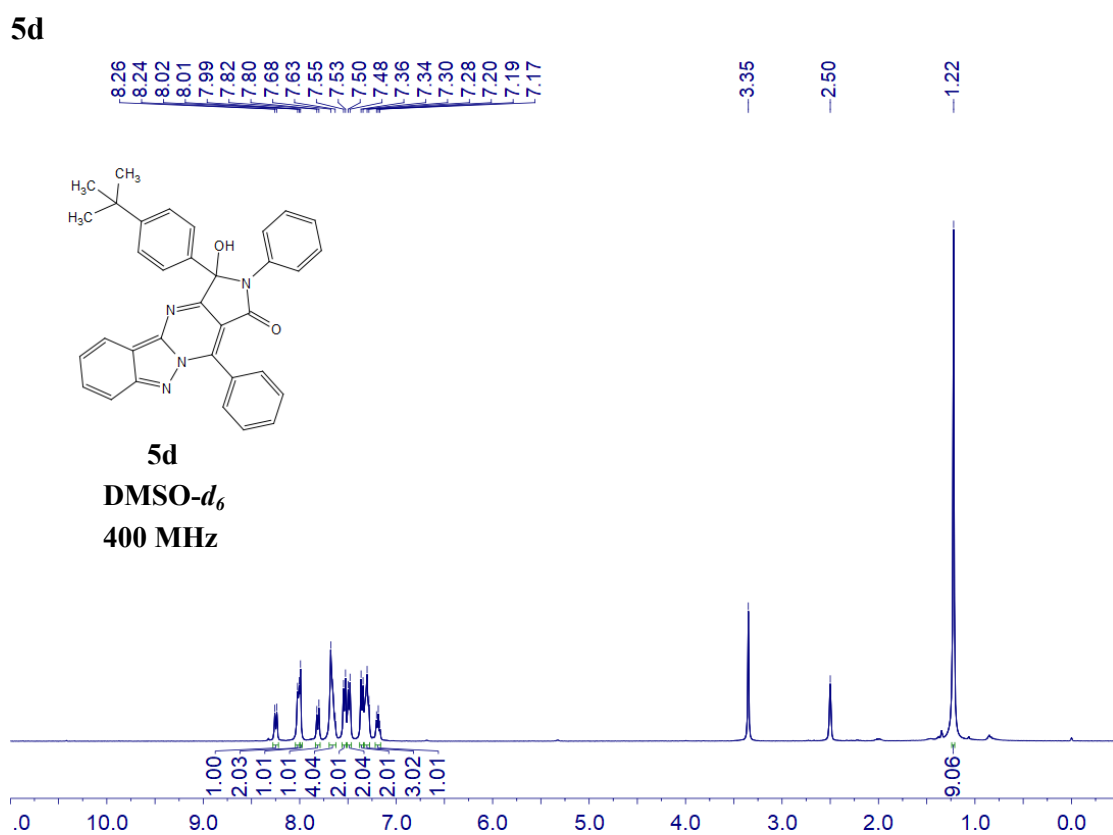

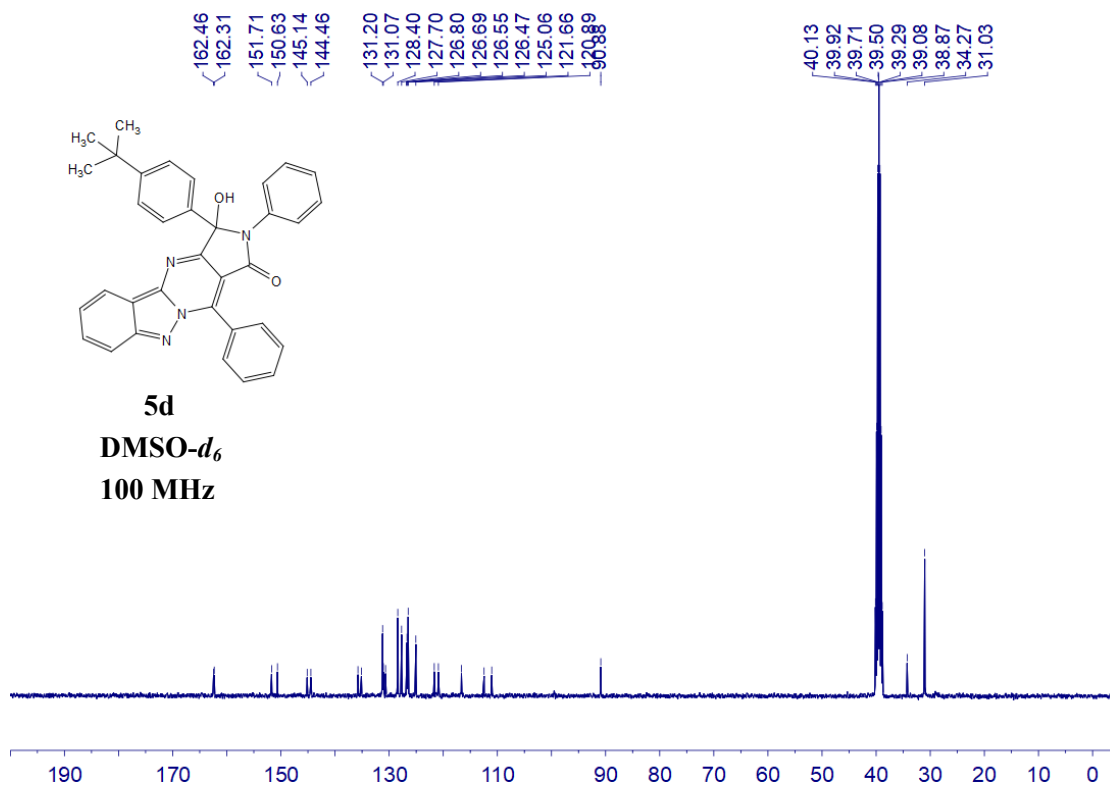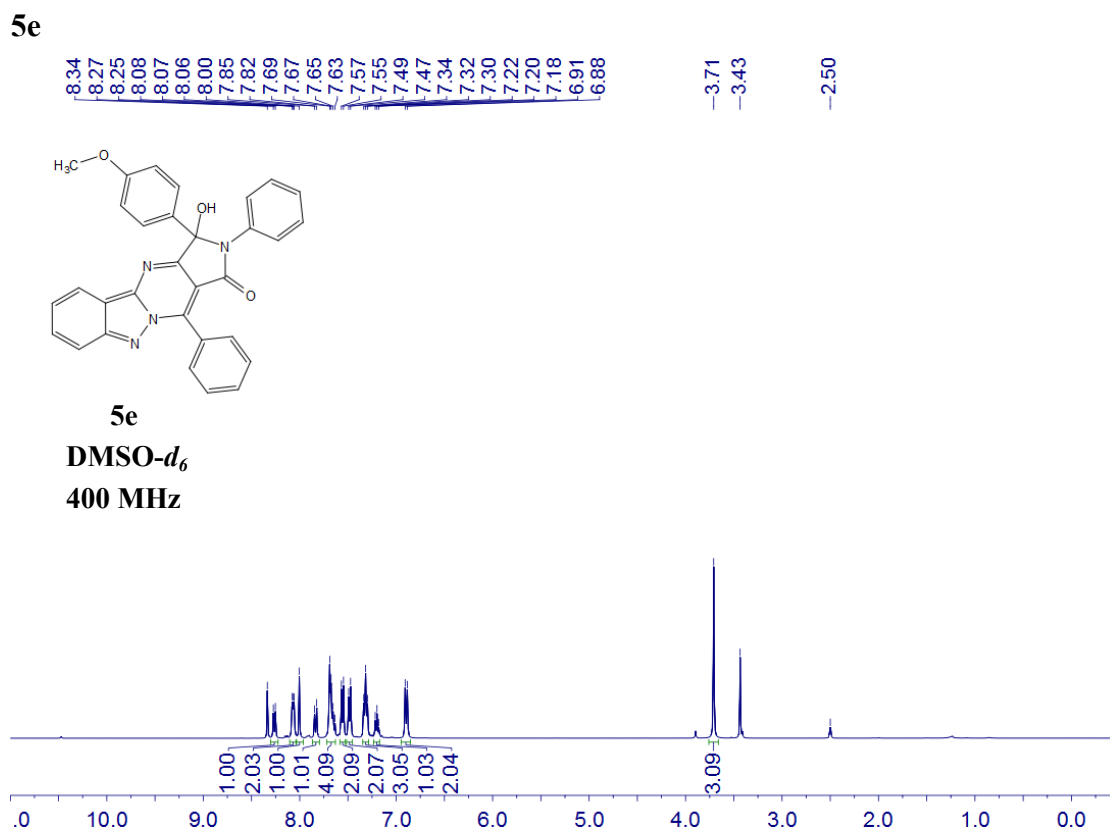

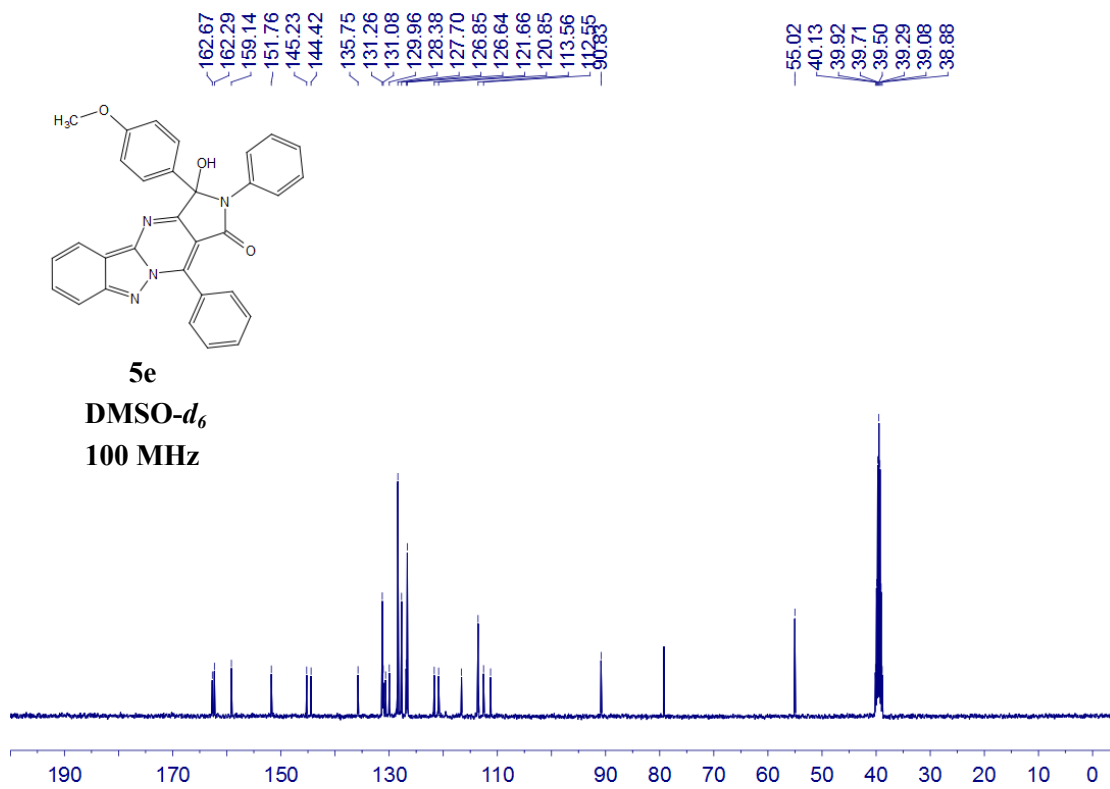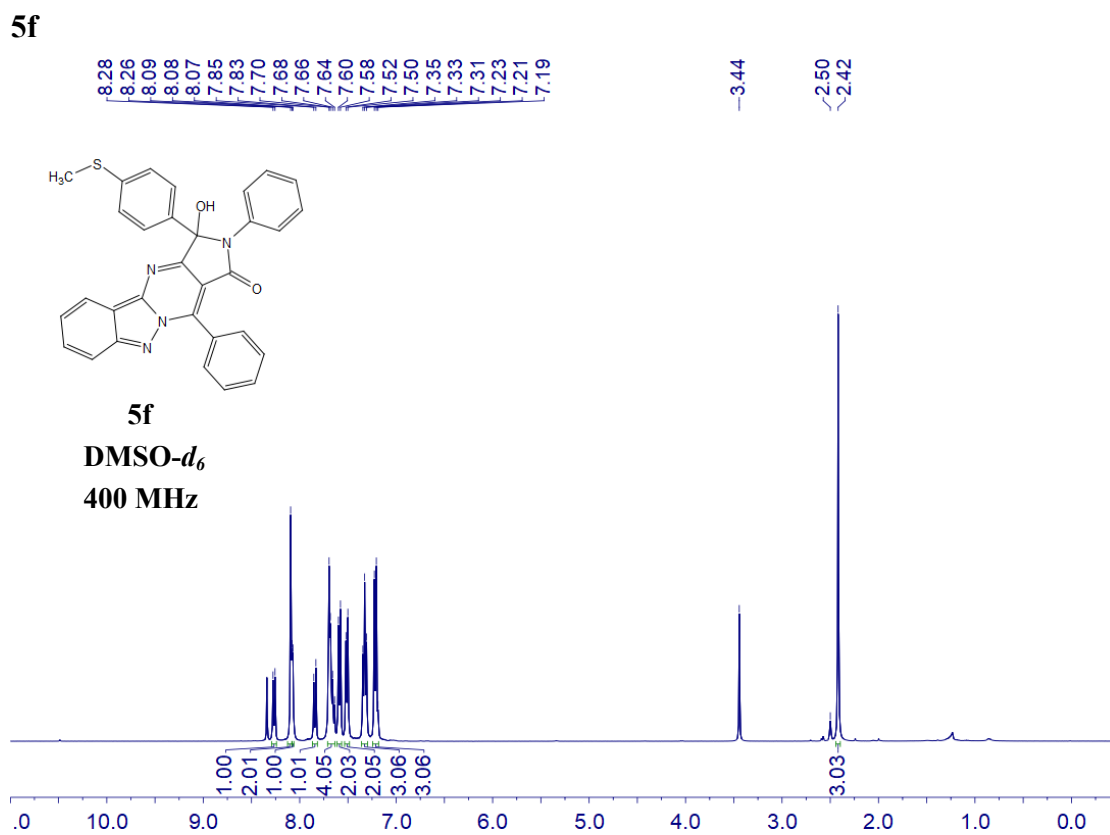

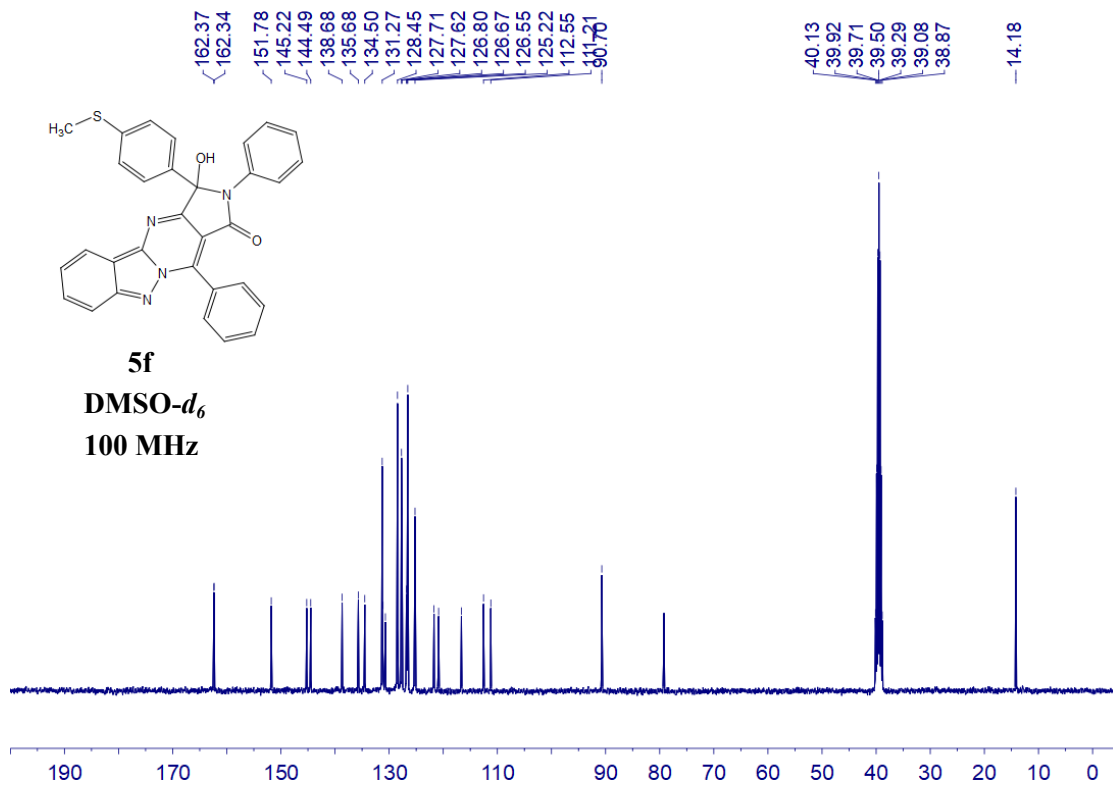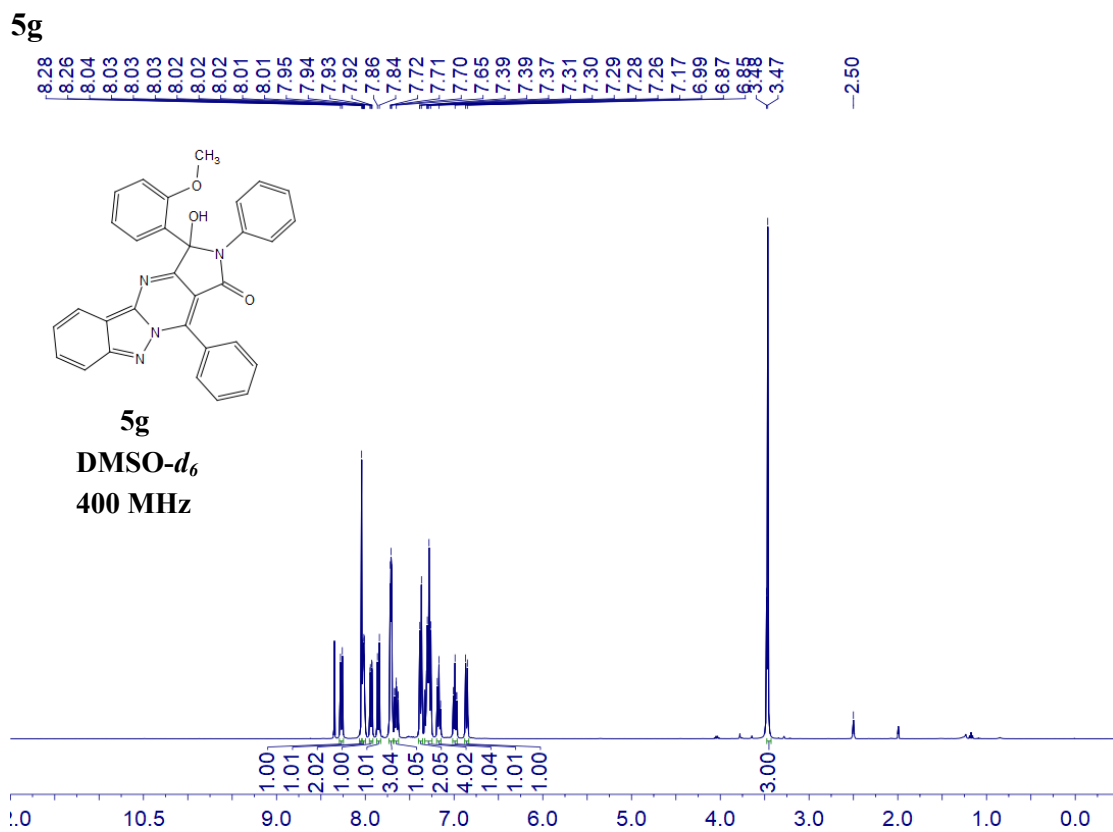

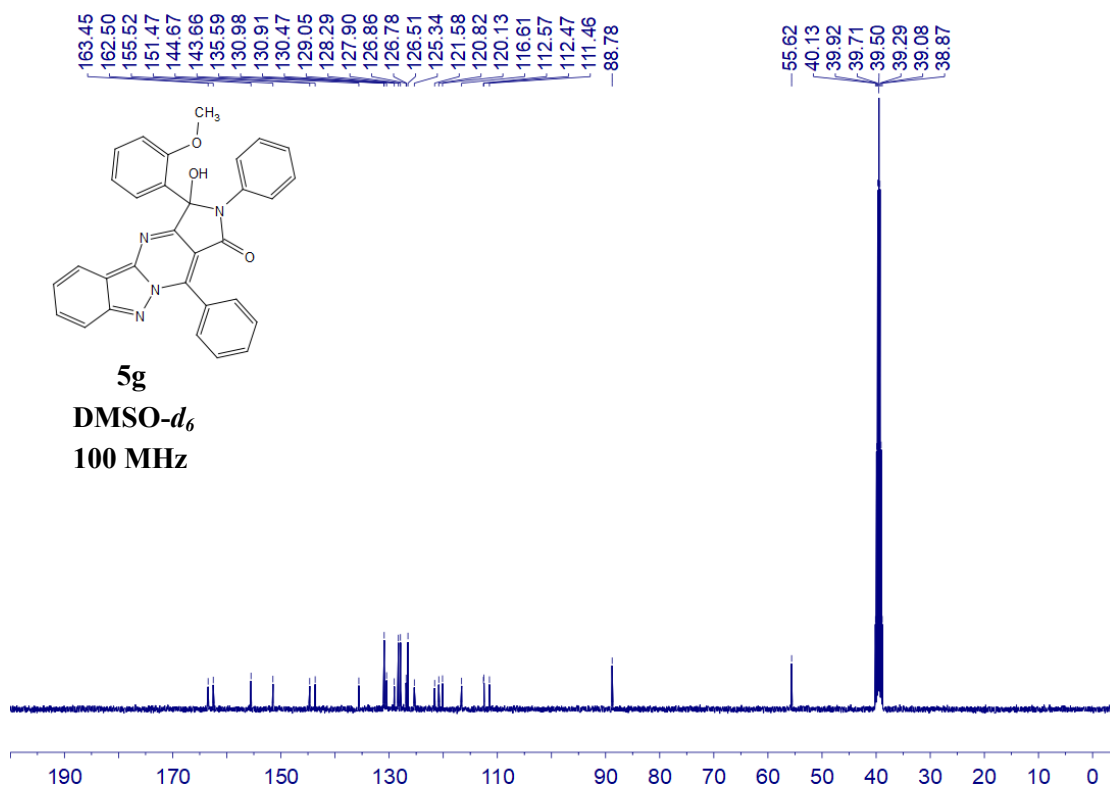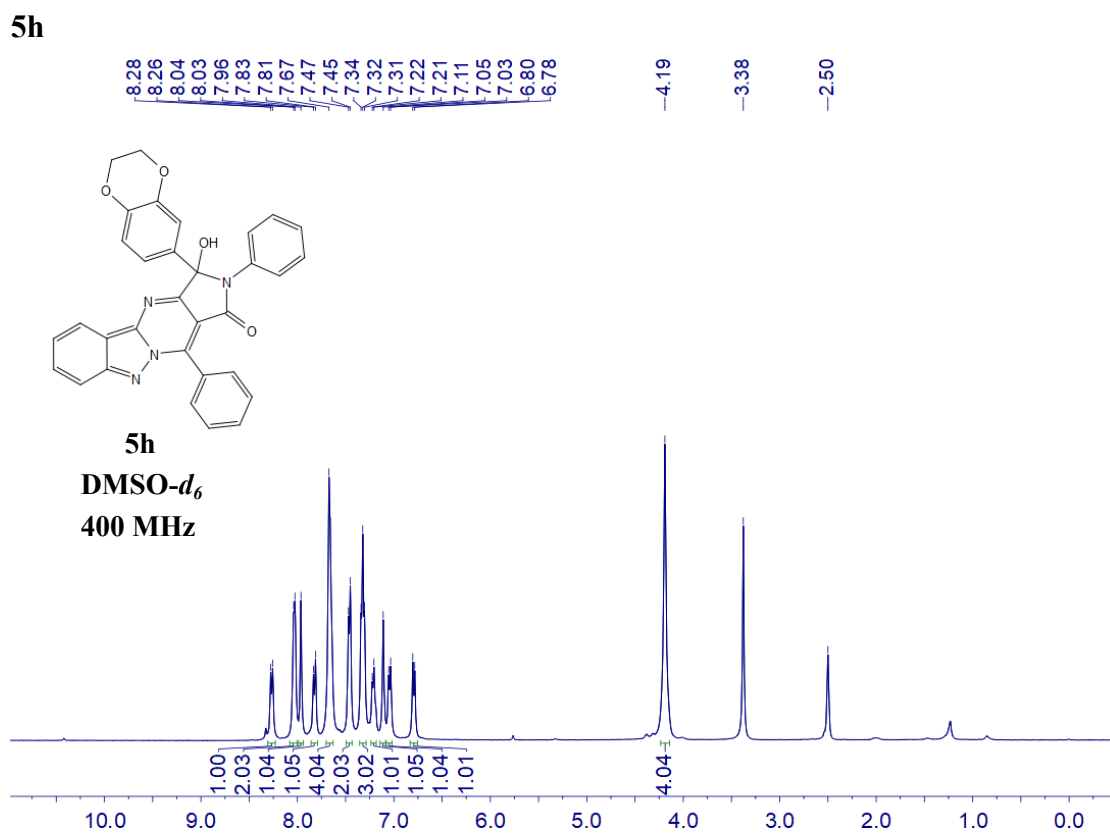



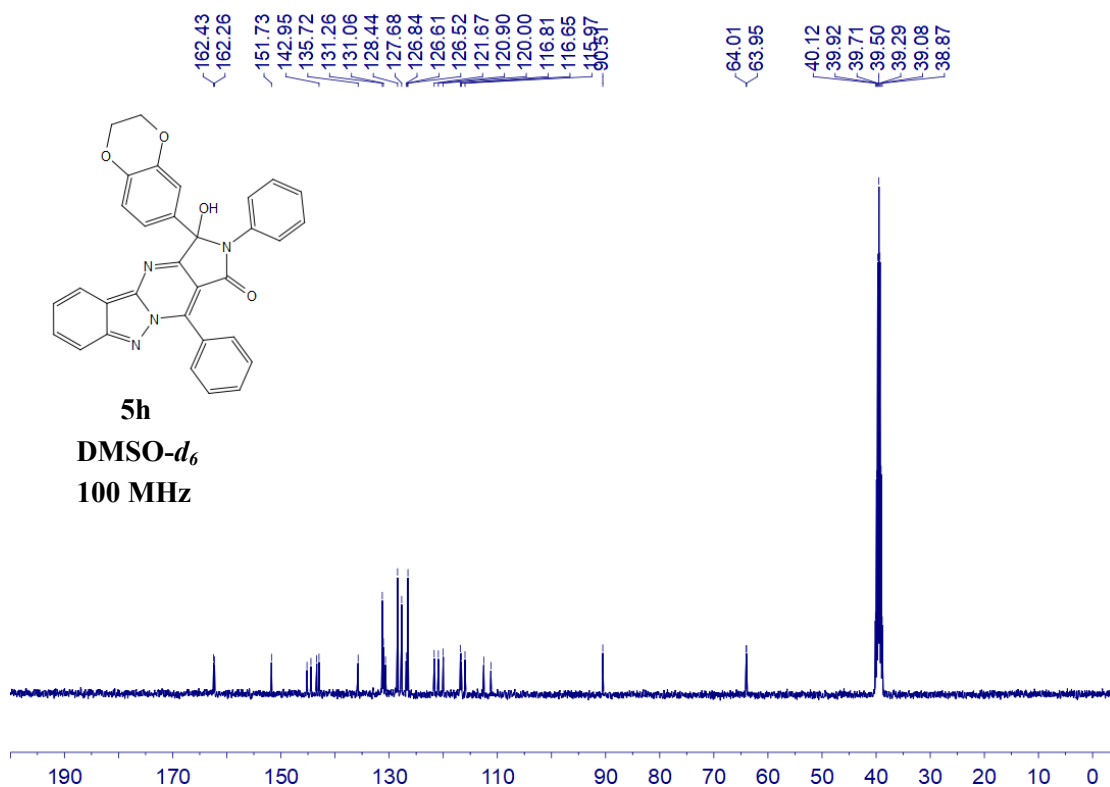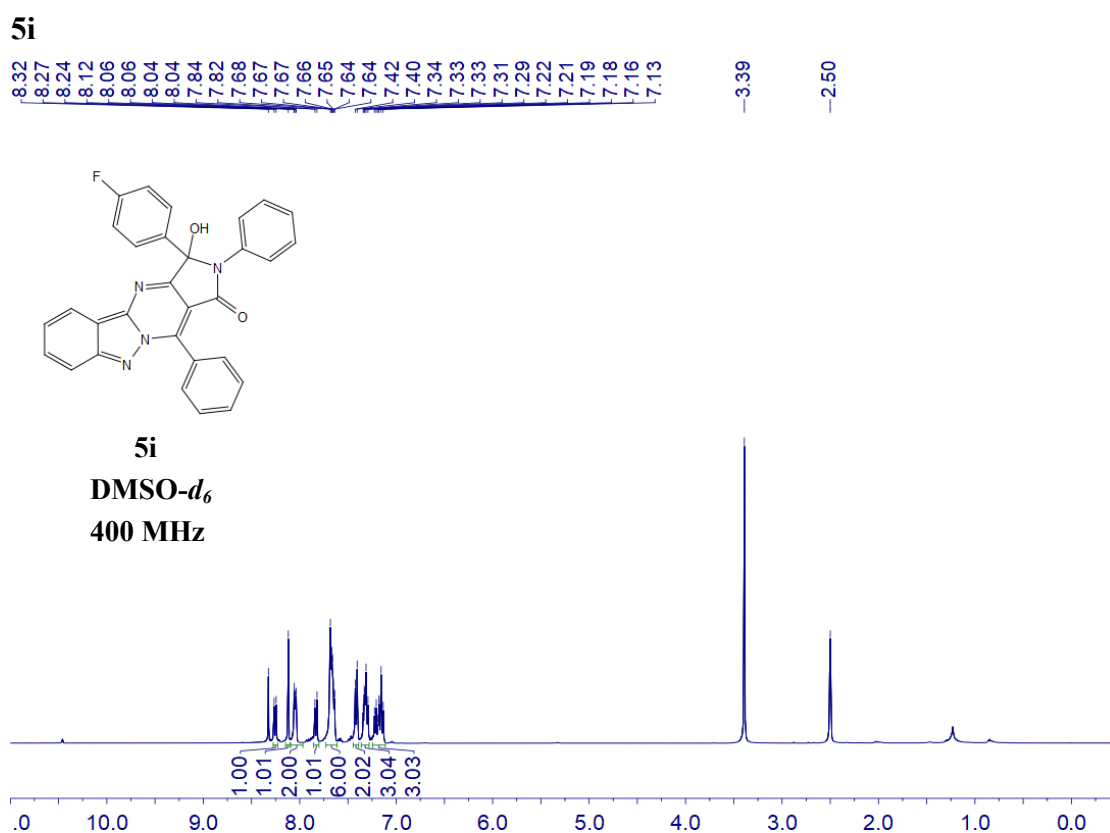

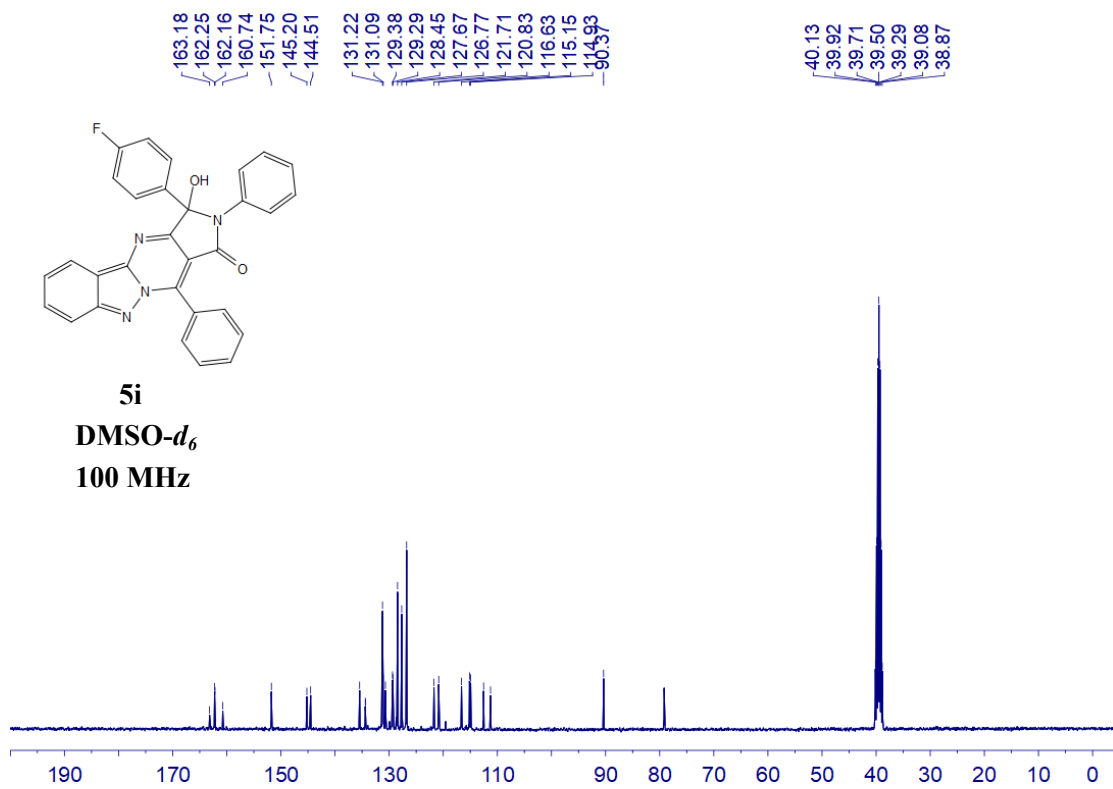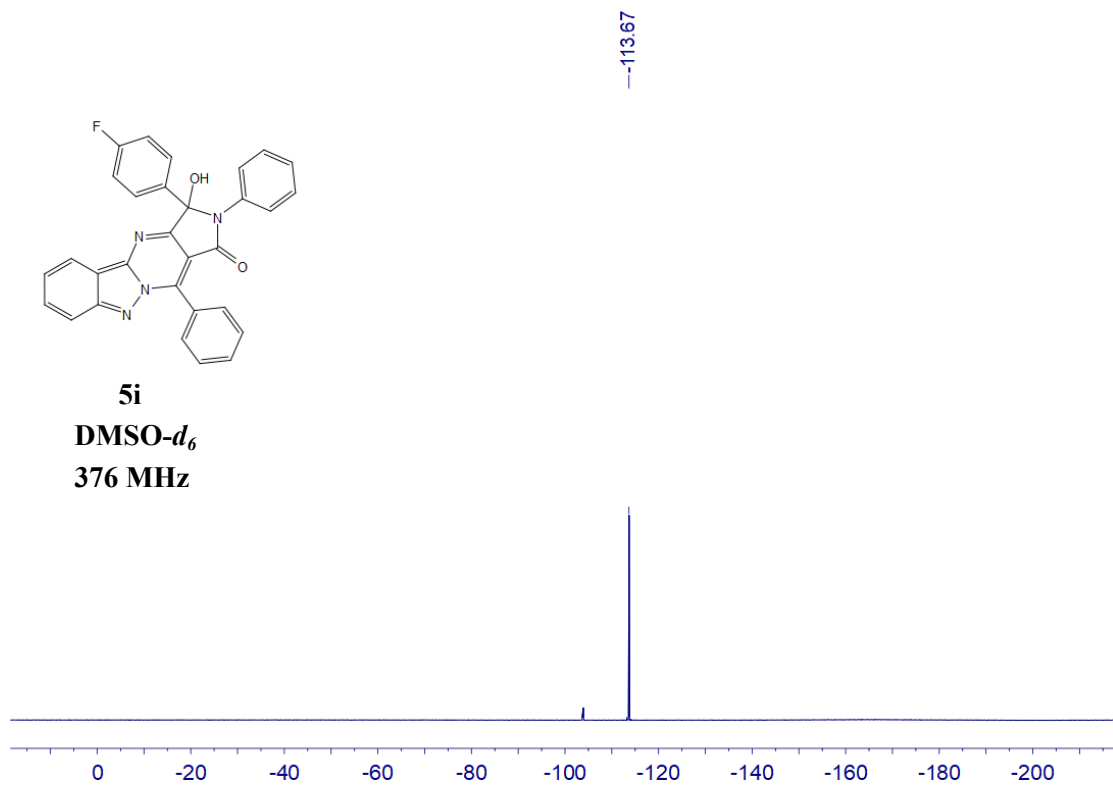

5j

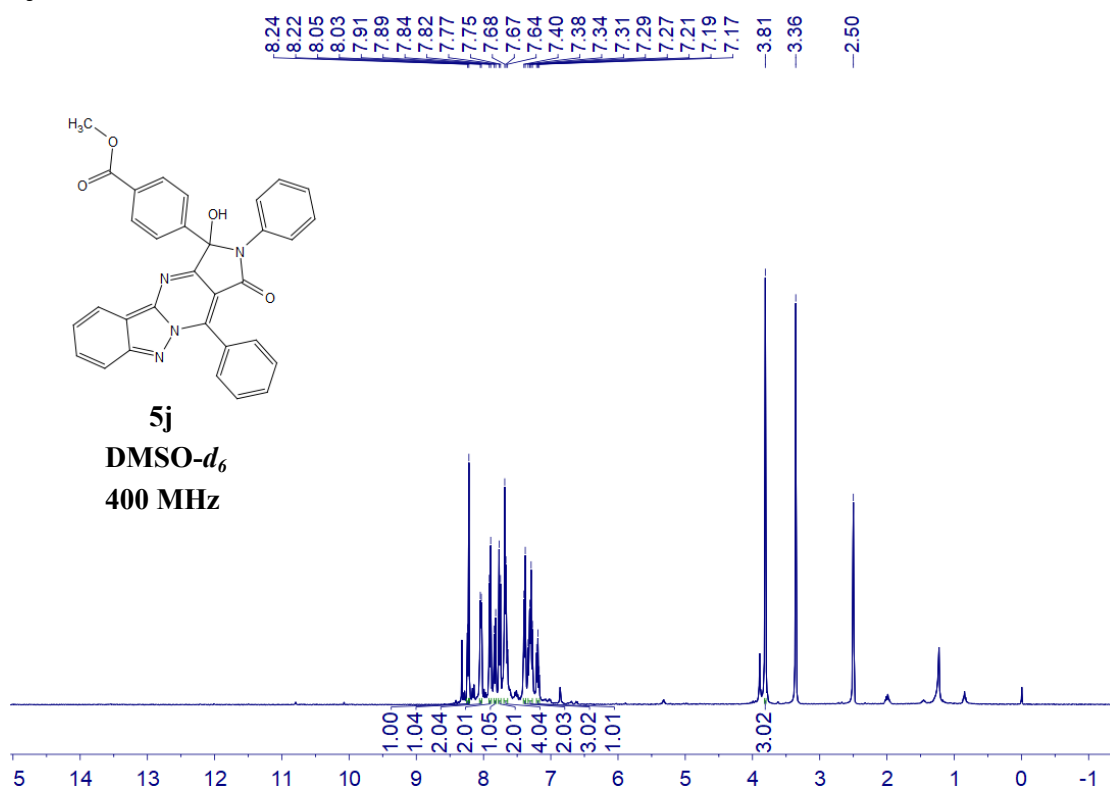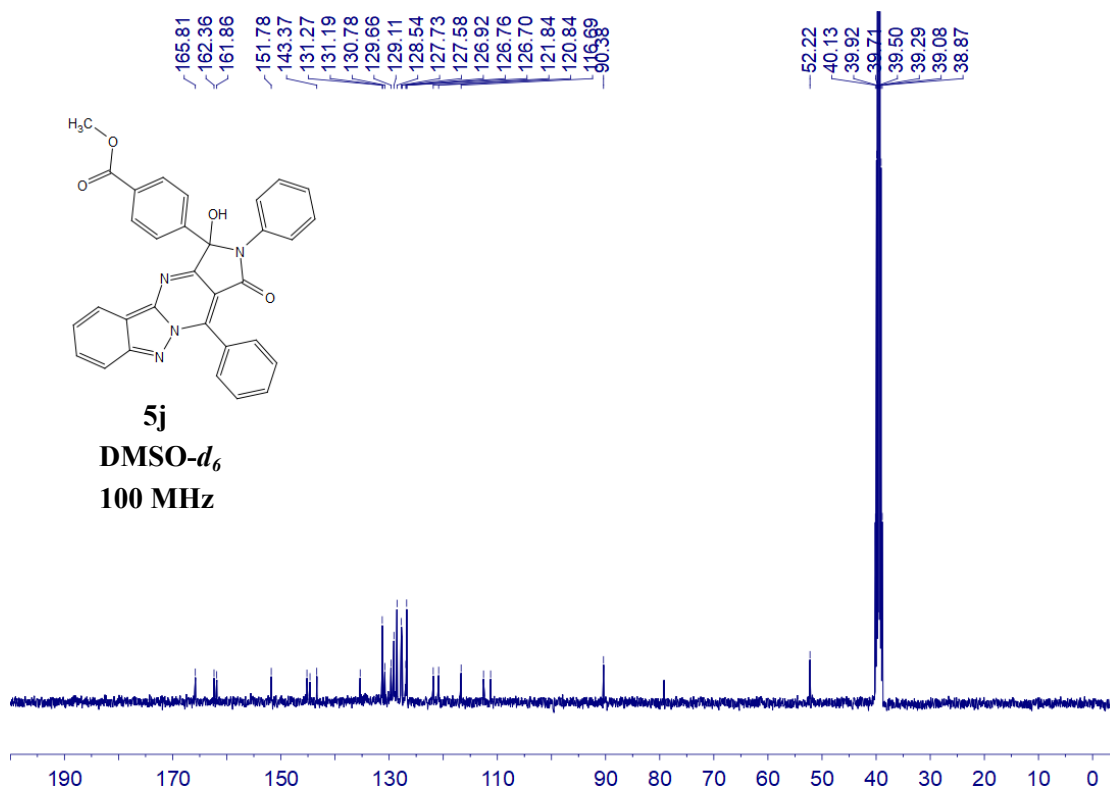

5k

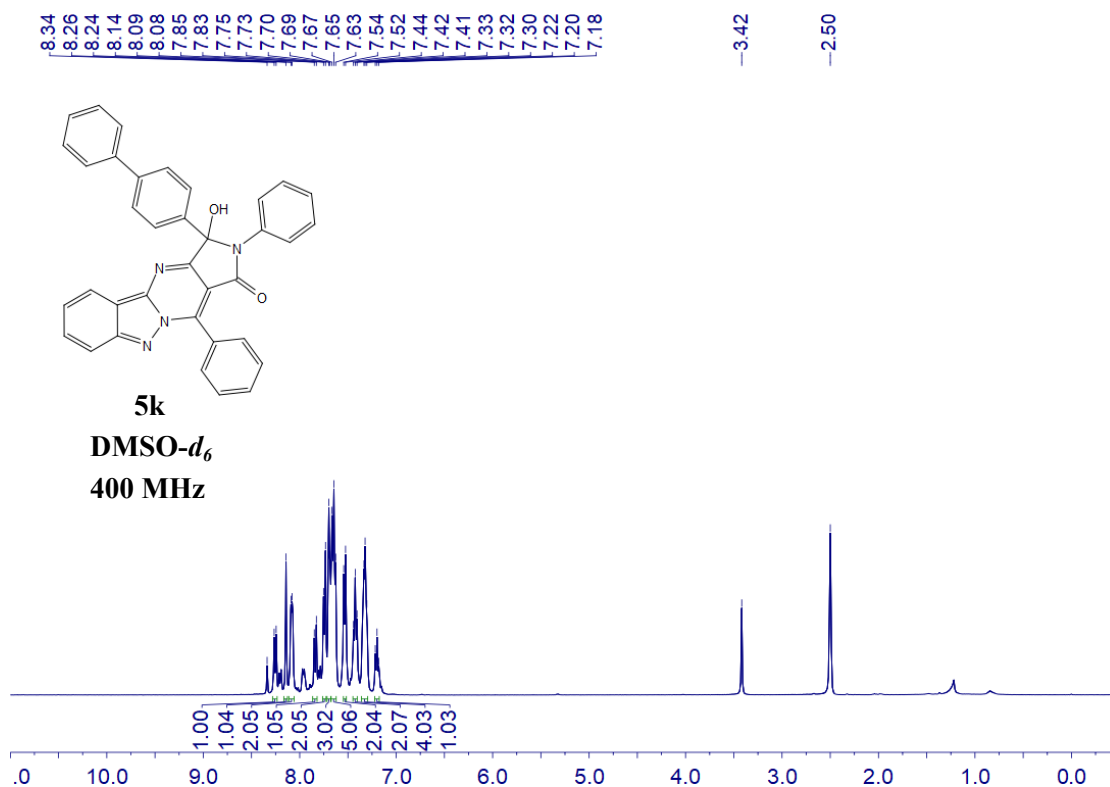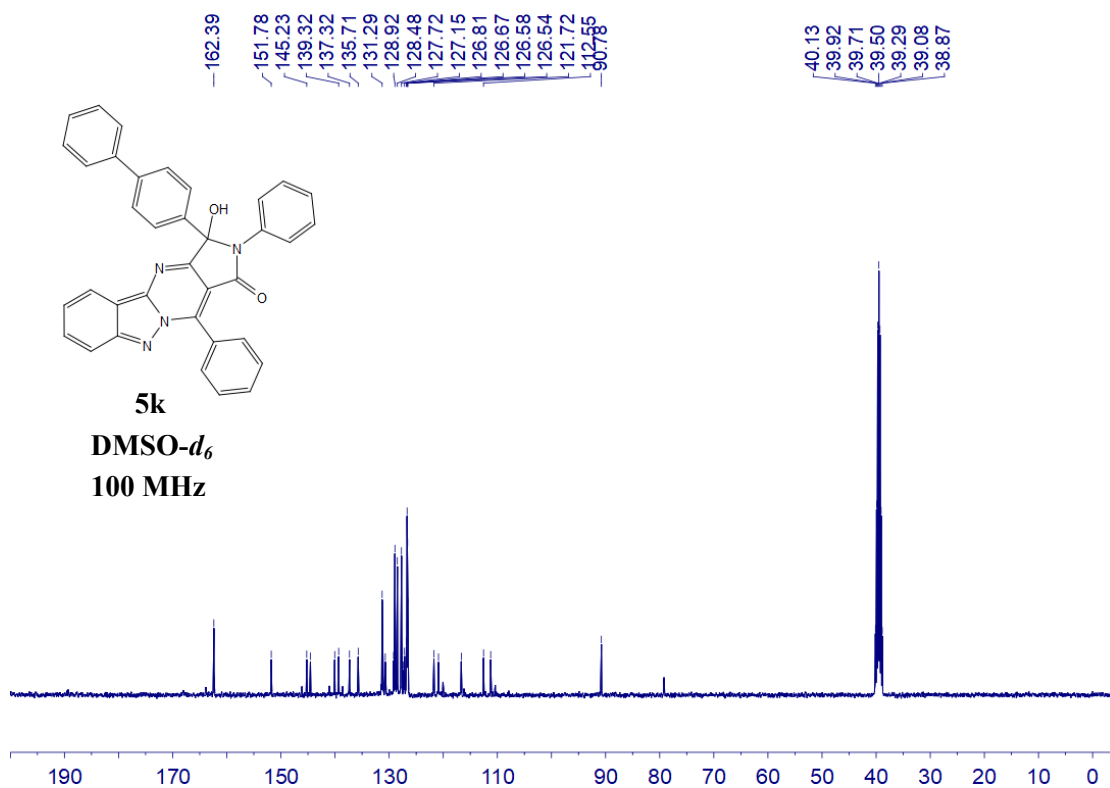

51

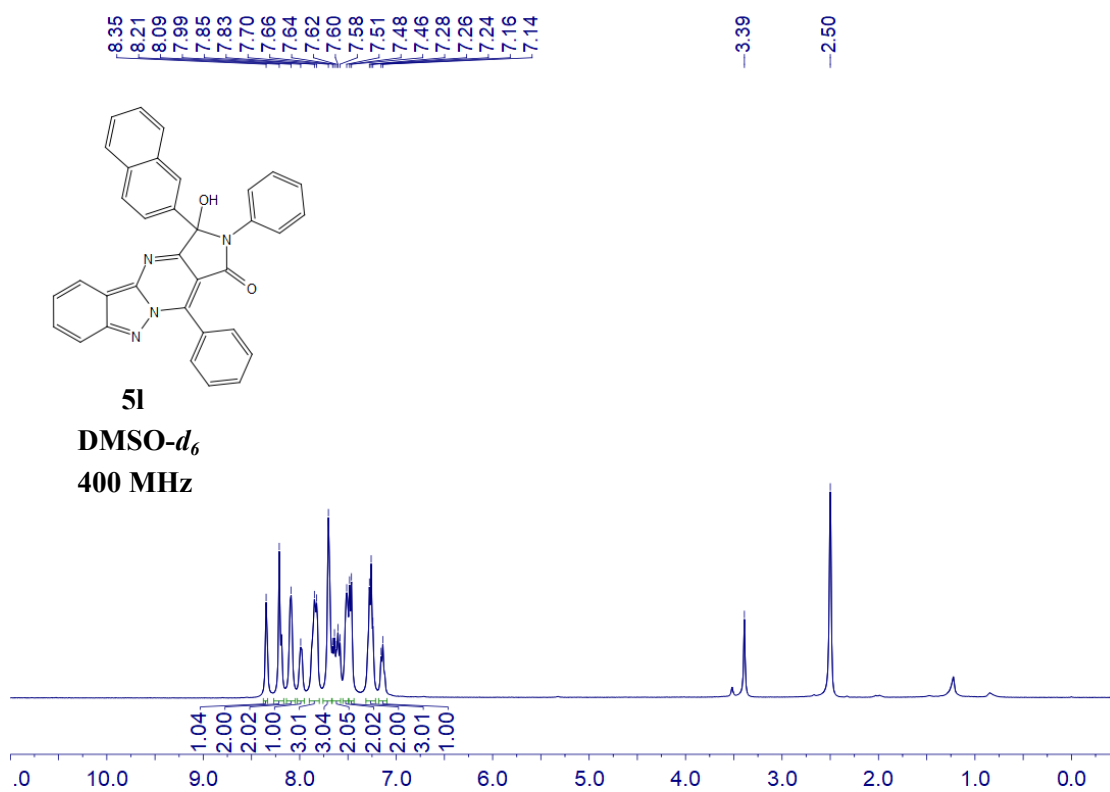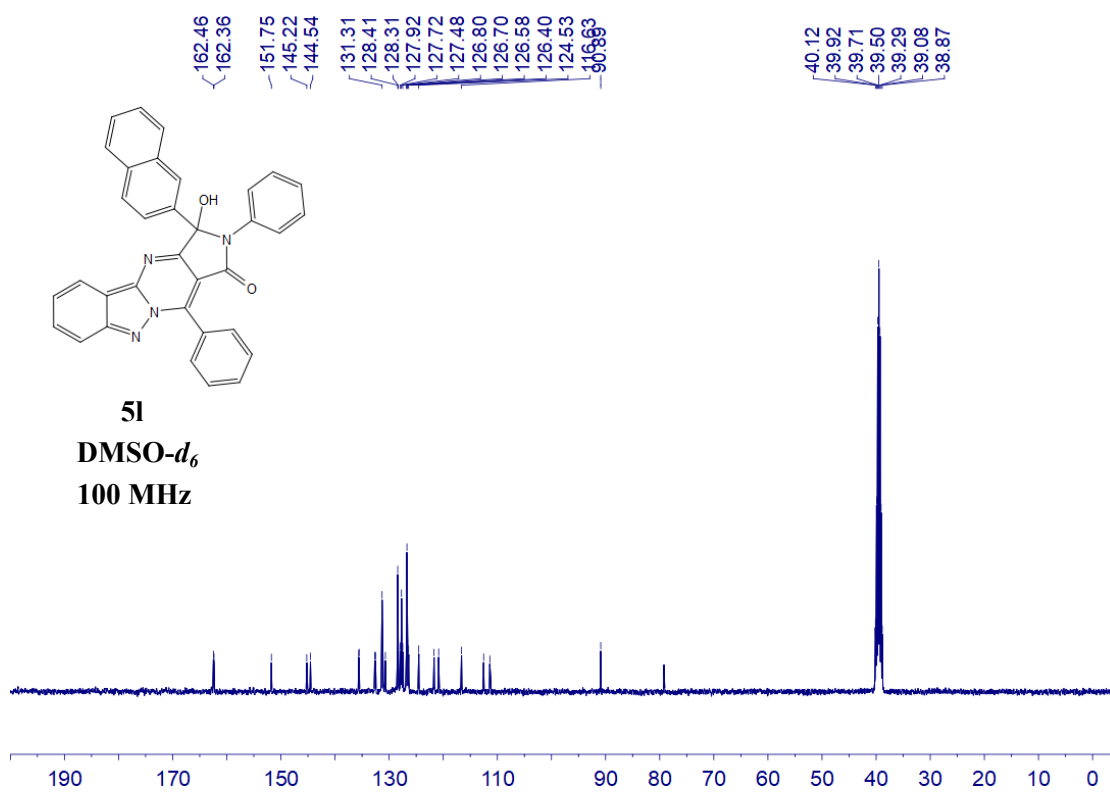

5m

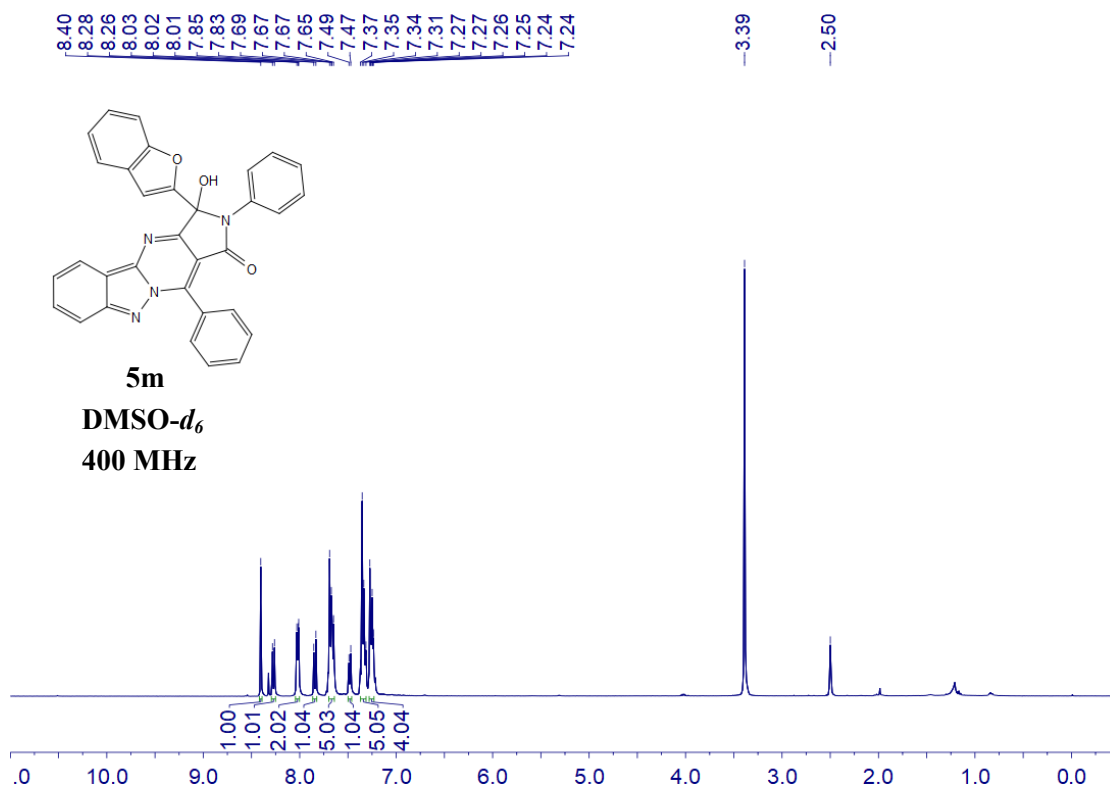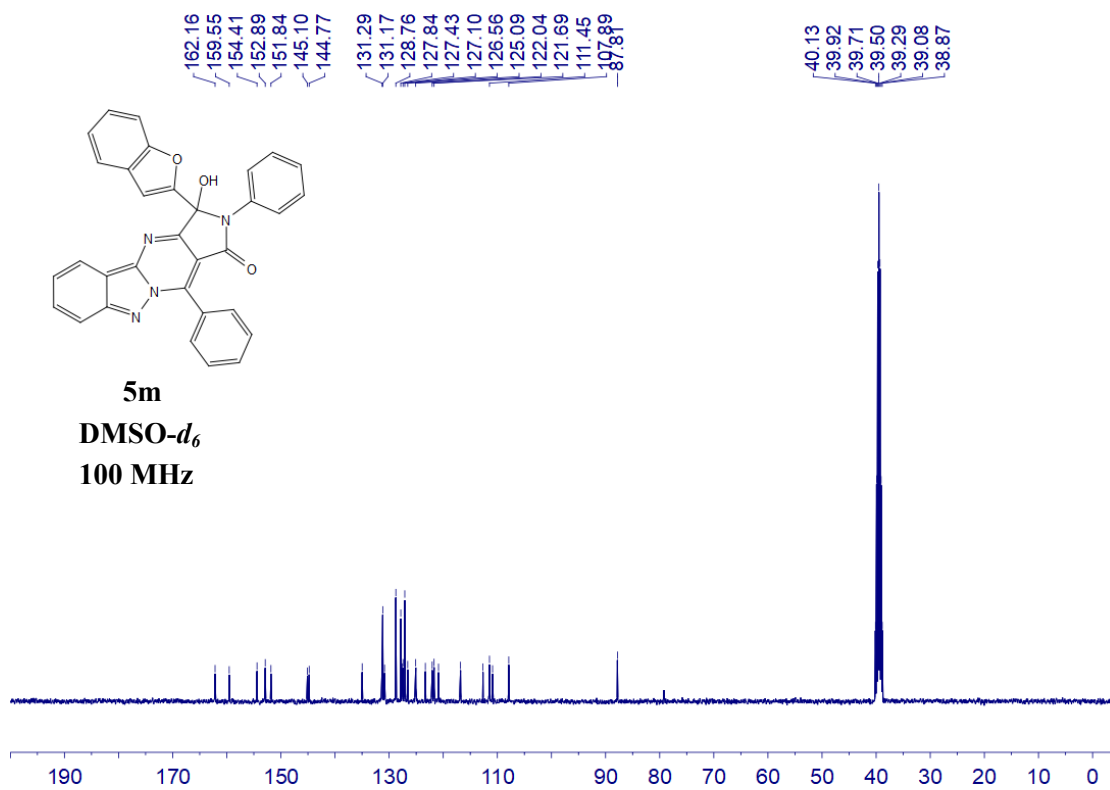

**5n**

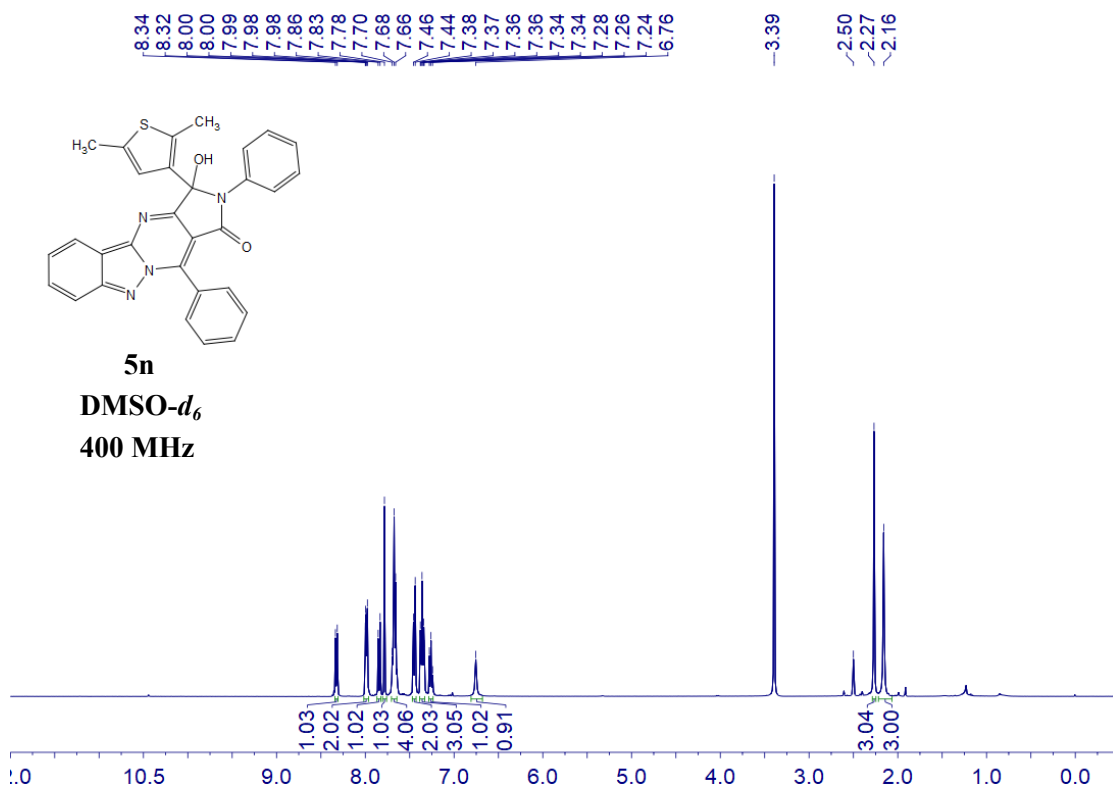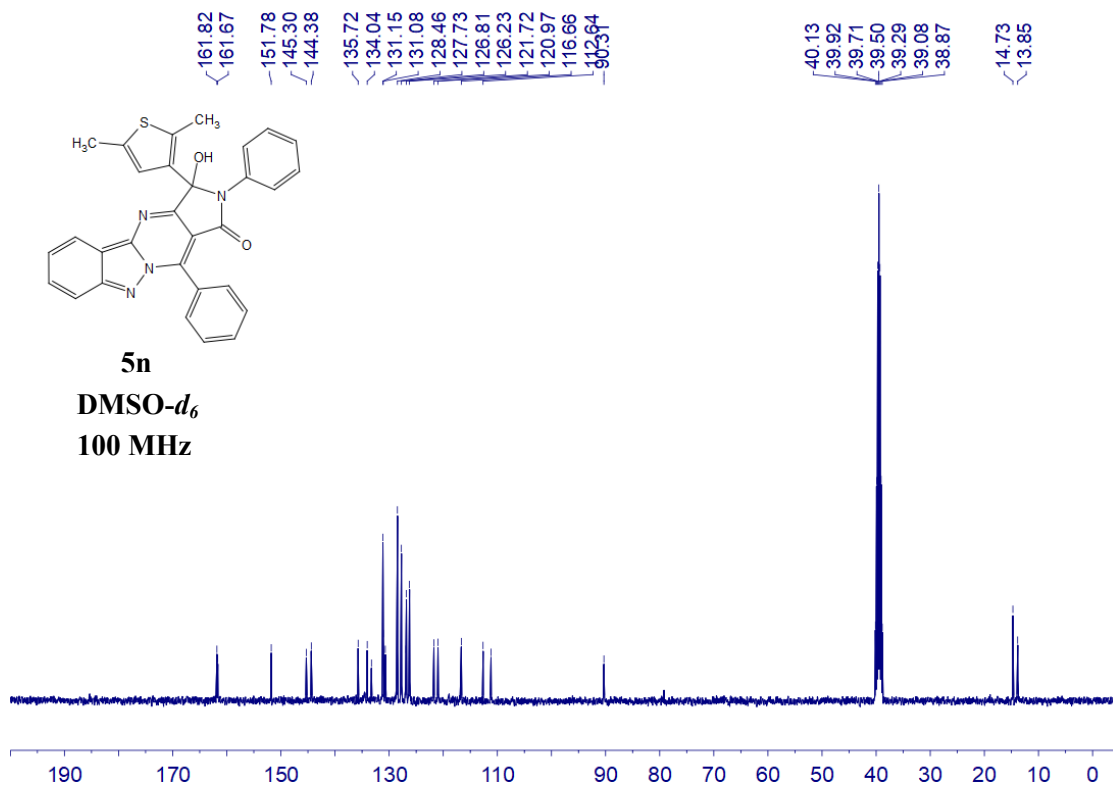

5o

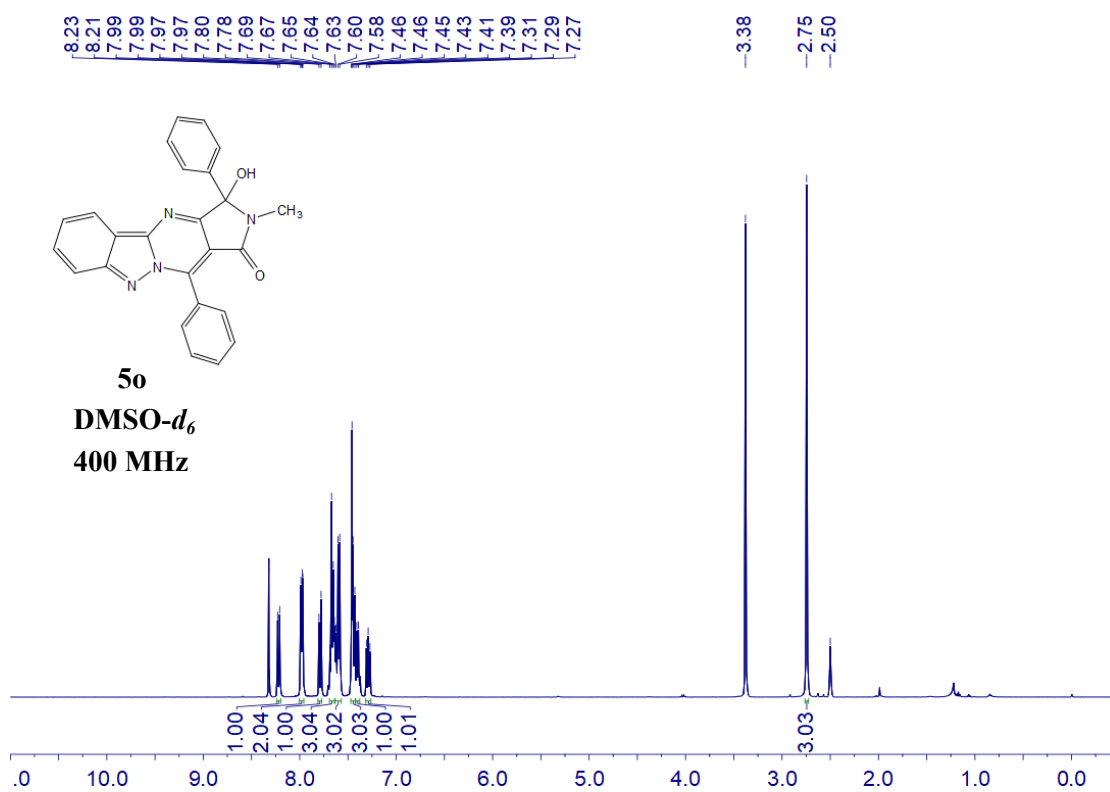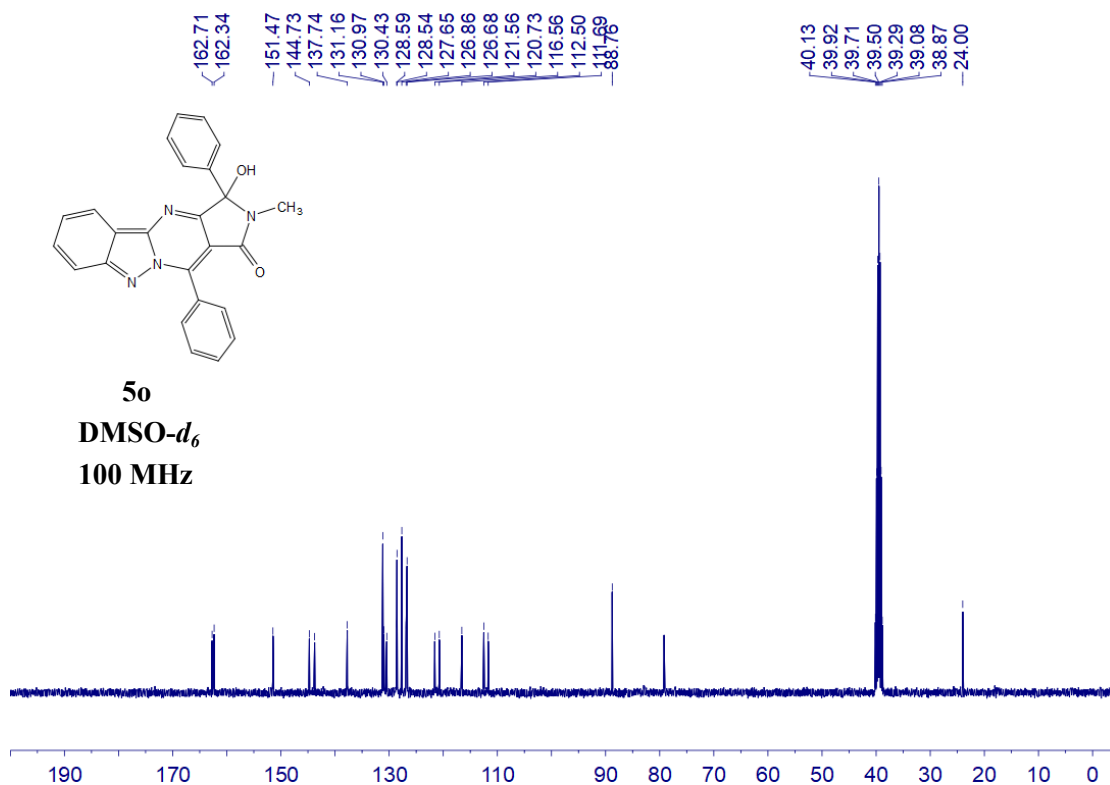



5p

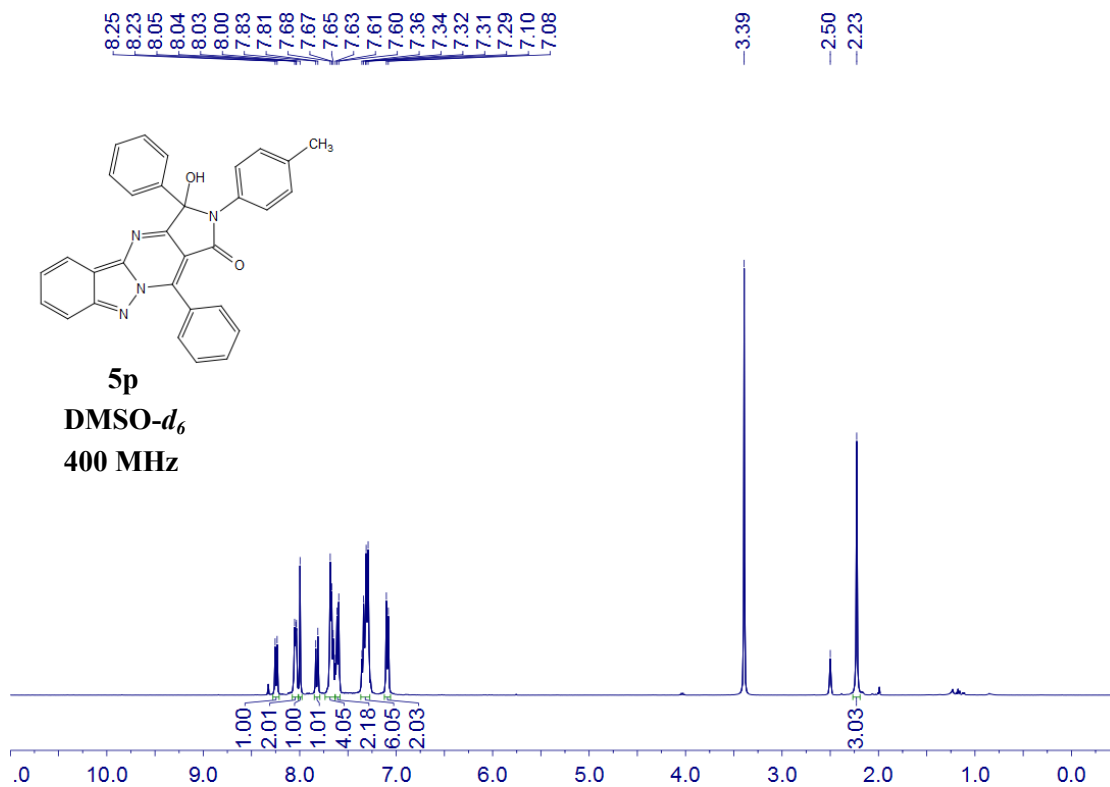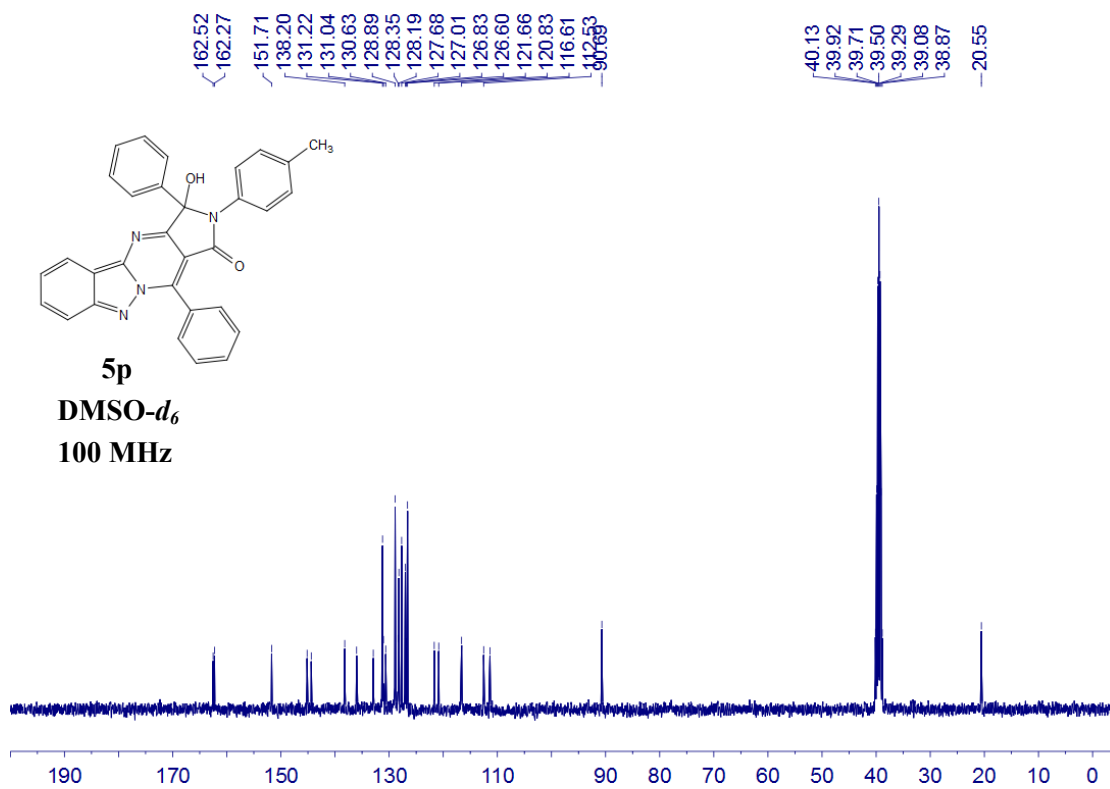

5q

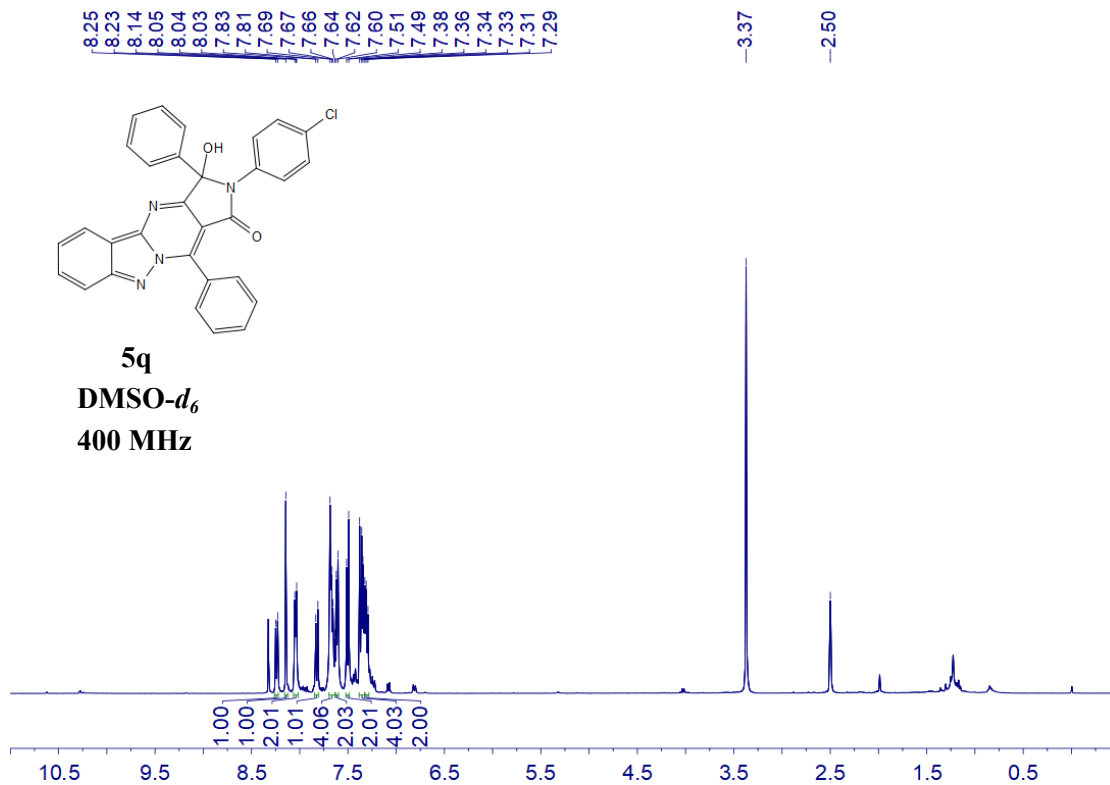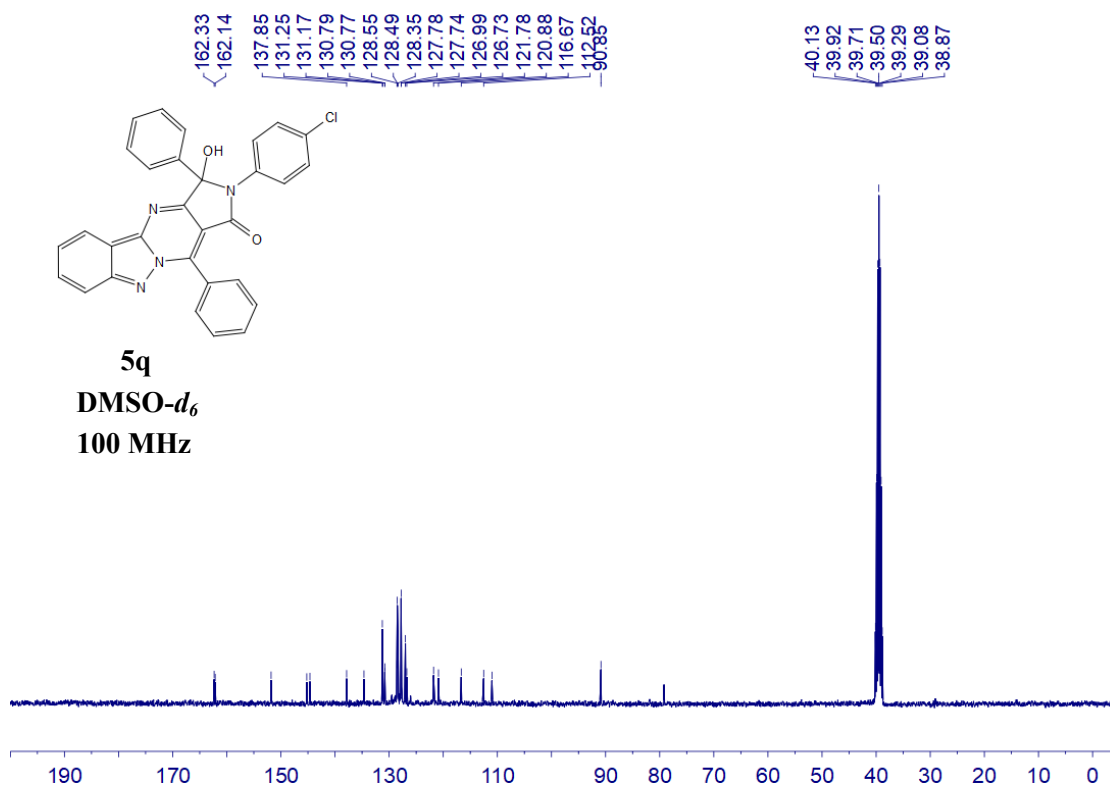

5r

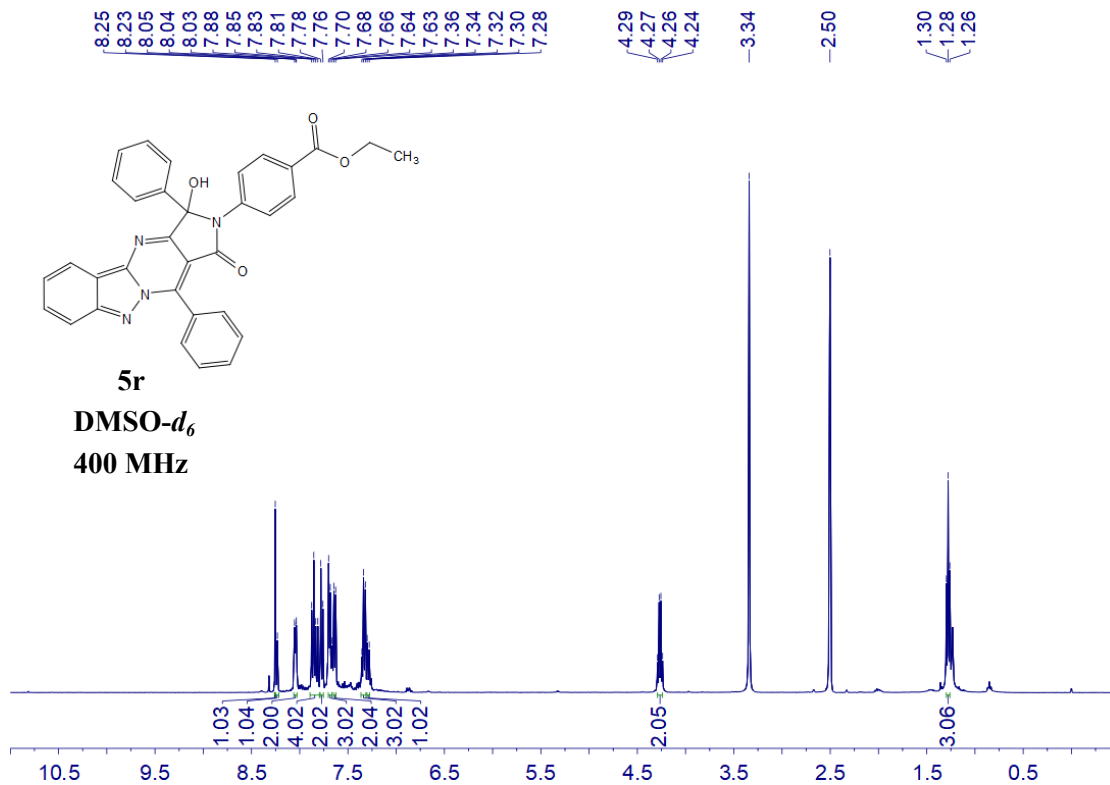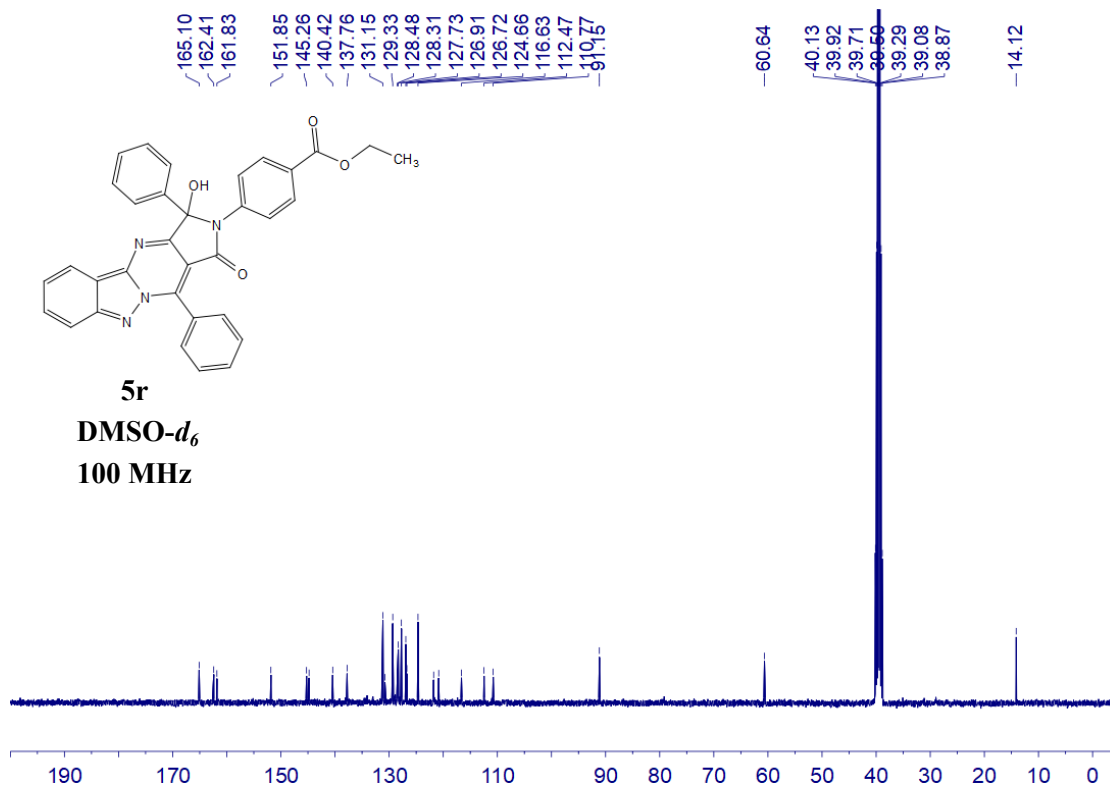

5s

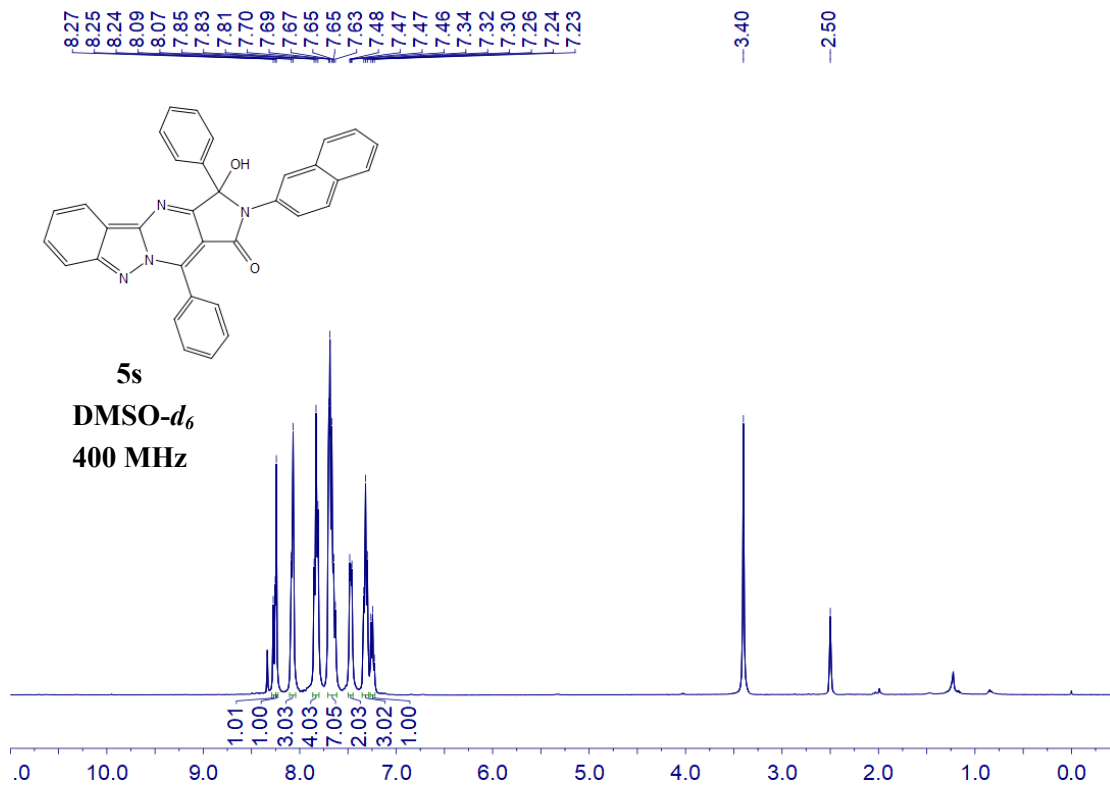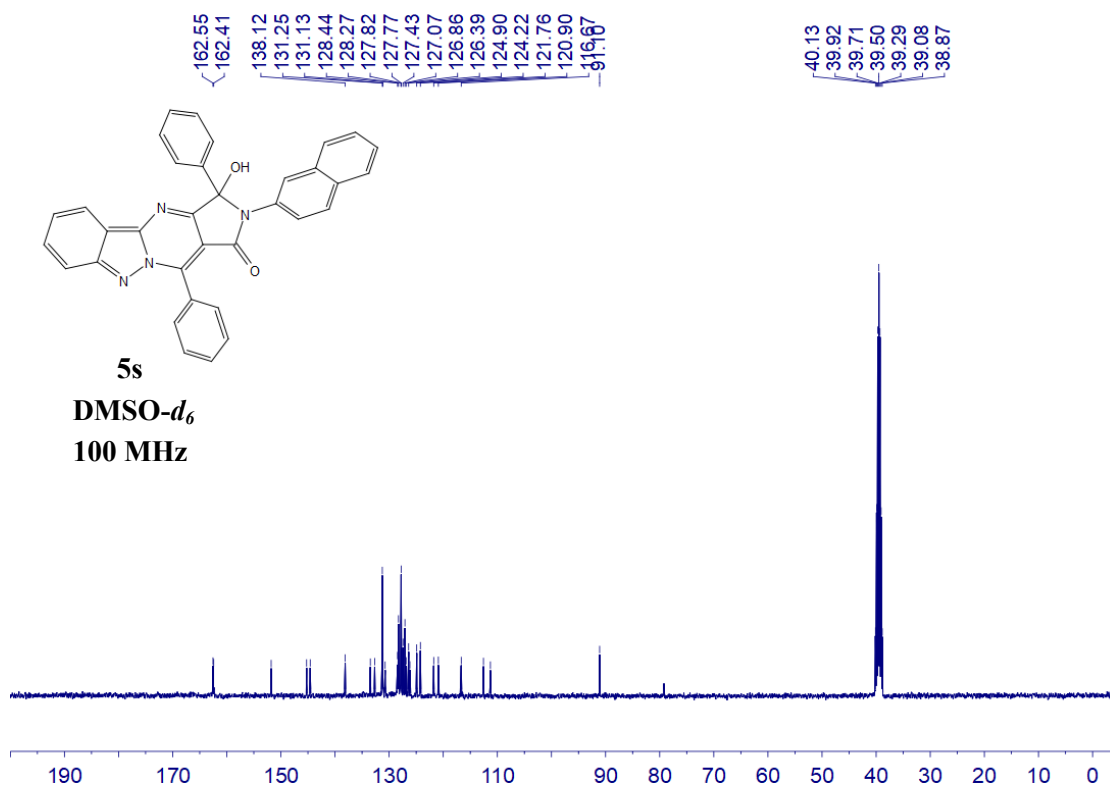

5t

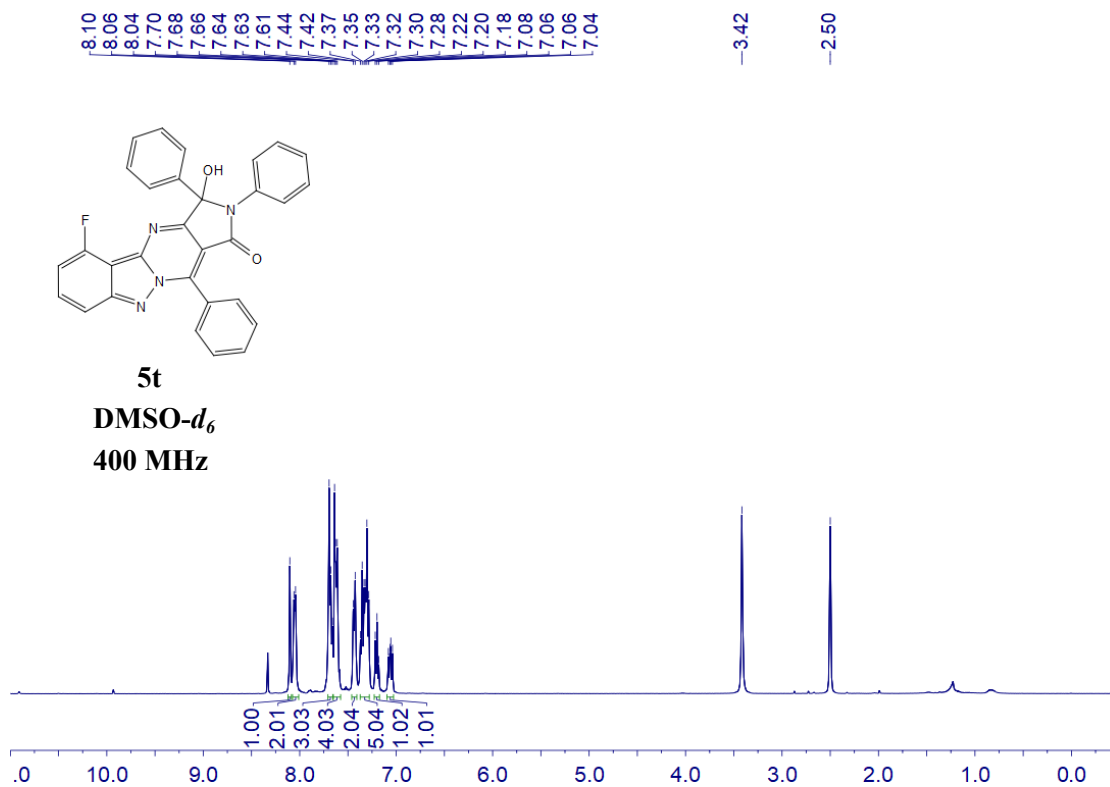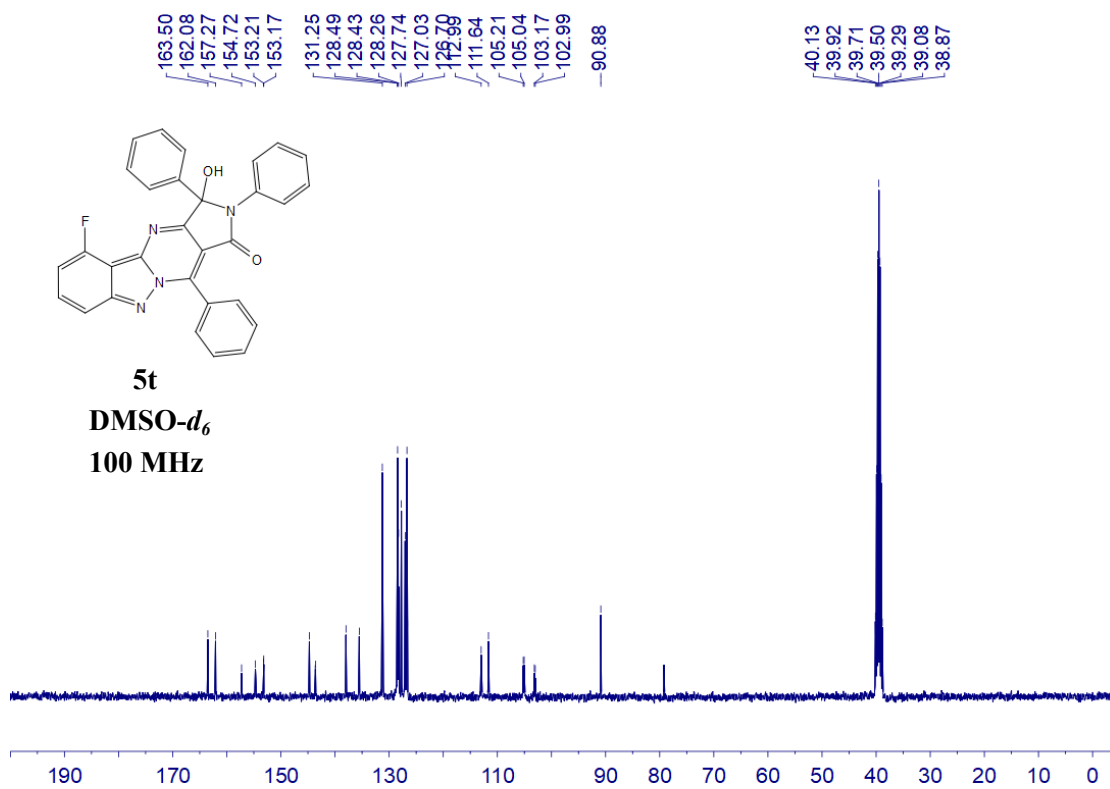

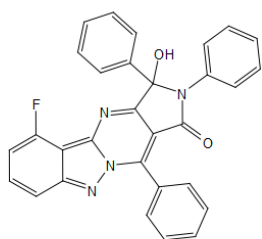

**5t**  
**DMSO-*d*<sub>6</sub>**  
**376 MHz**

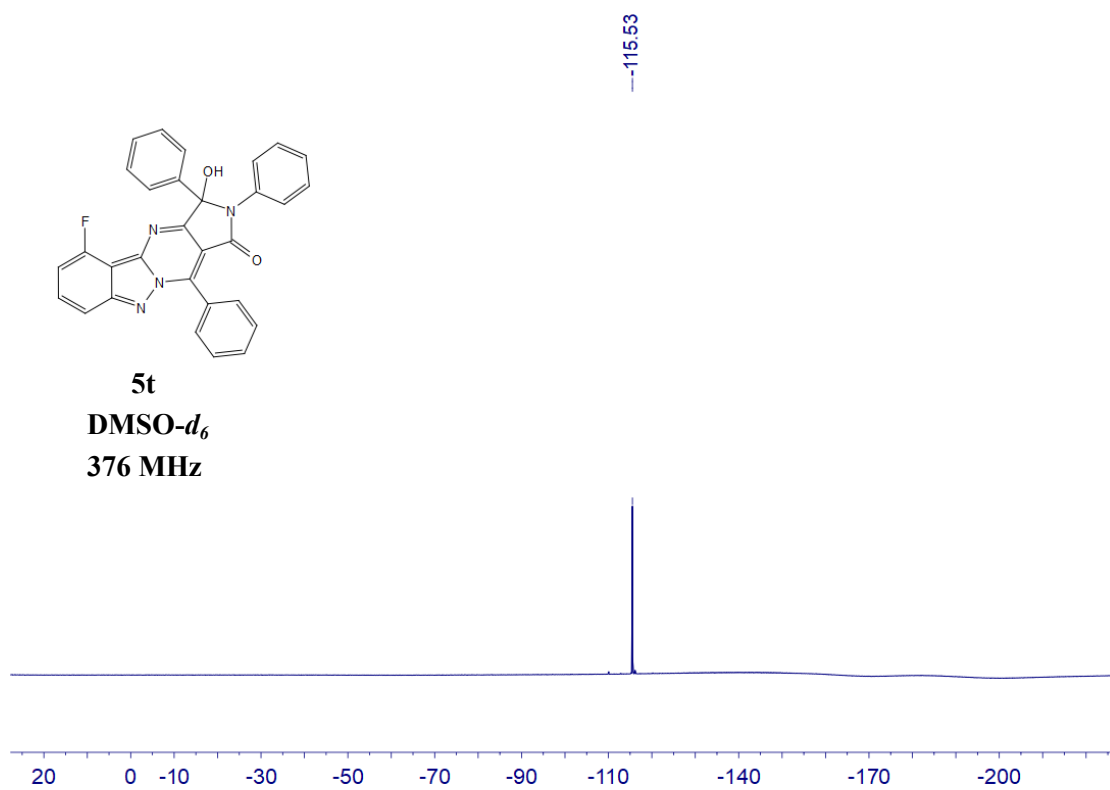

**5u**

8.06  
8.00  
8.00  
7.99  
7.98  
7.85  
7.83  
7.81  
7.68  
7.67  
7.66  
7.64  
7.52  
7.50  
7.38  
7.36  
7.36  
7.34  
7.34  
7.33  
7.32  
7.31  
7.30  
7.29  
7.29  
7.21  
7.20  
7.18

-3.38

-2.50

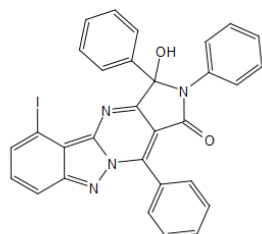

**5u**  
**DMSO-*d*<sub>6</sub>**  
**400 MHz**

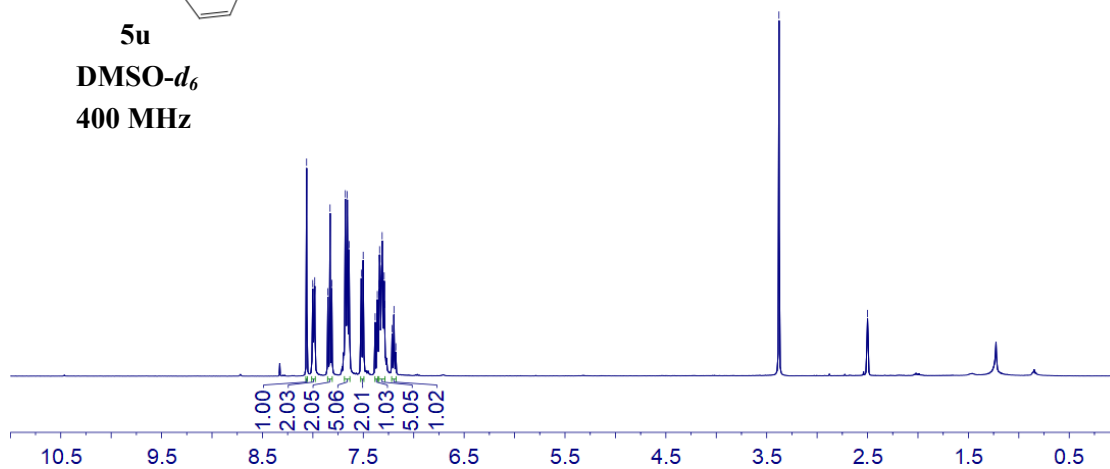

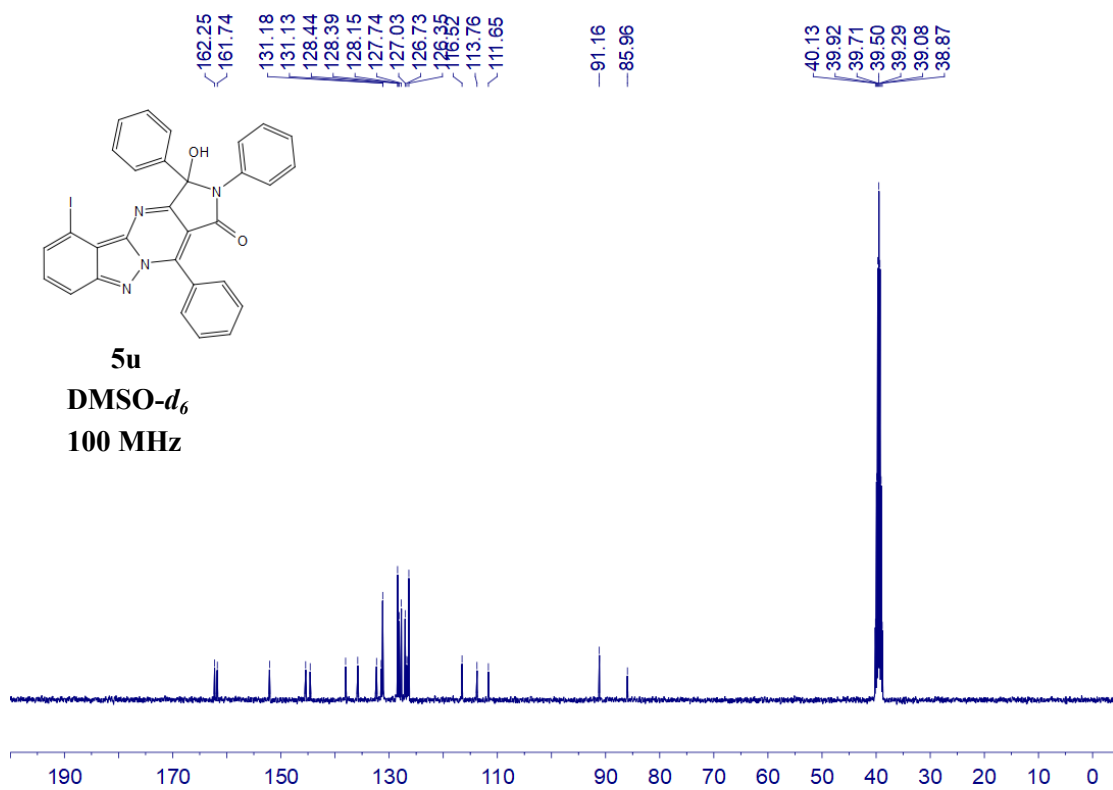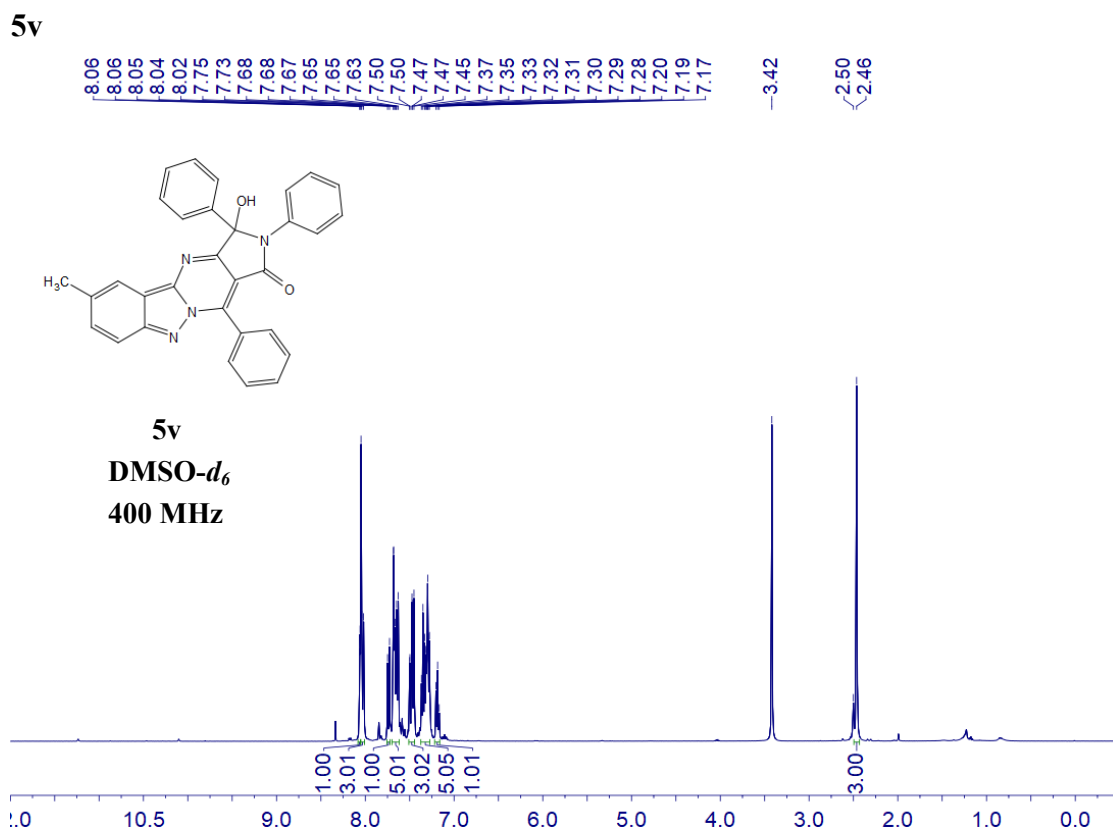

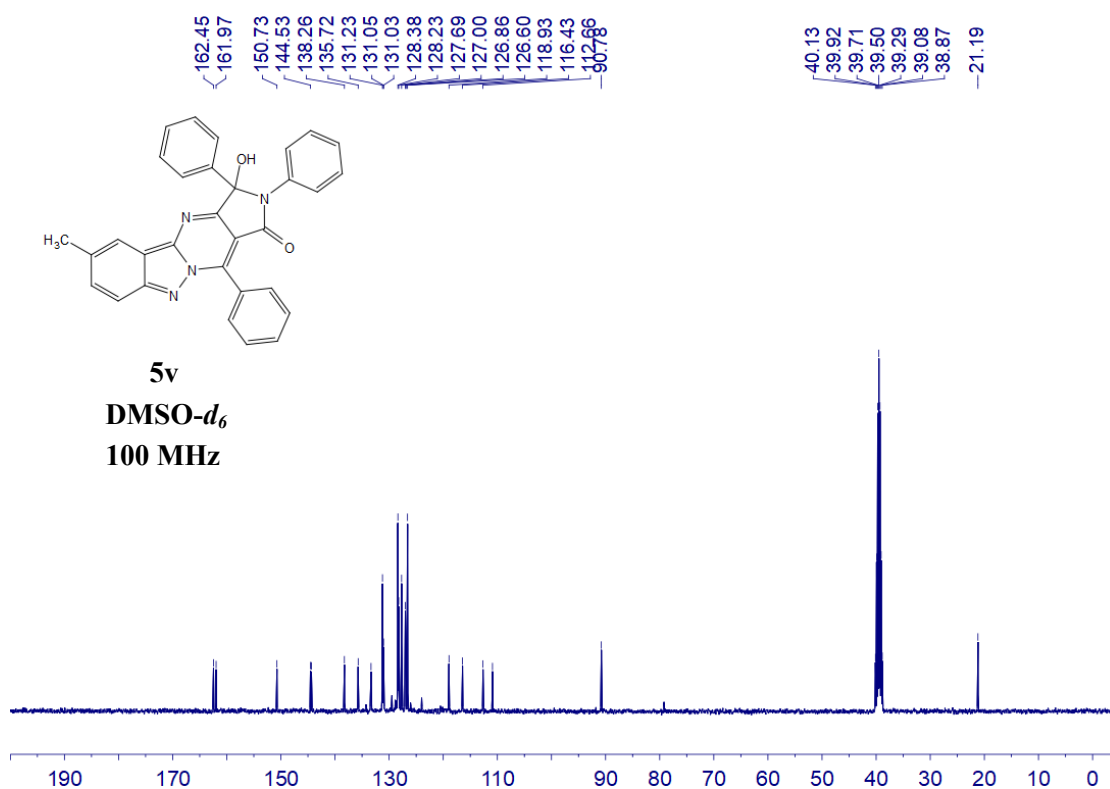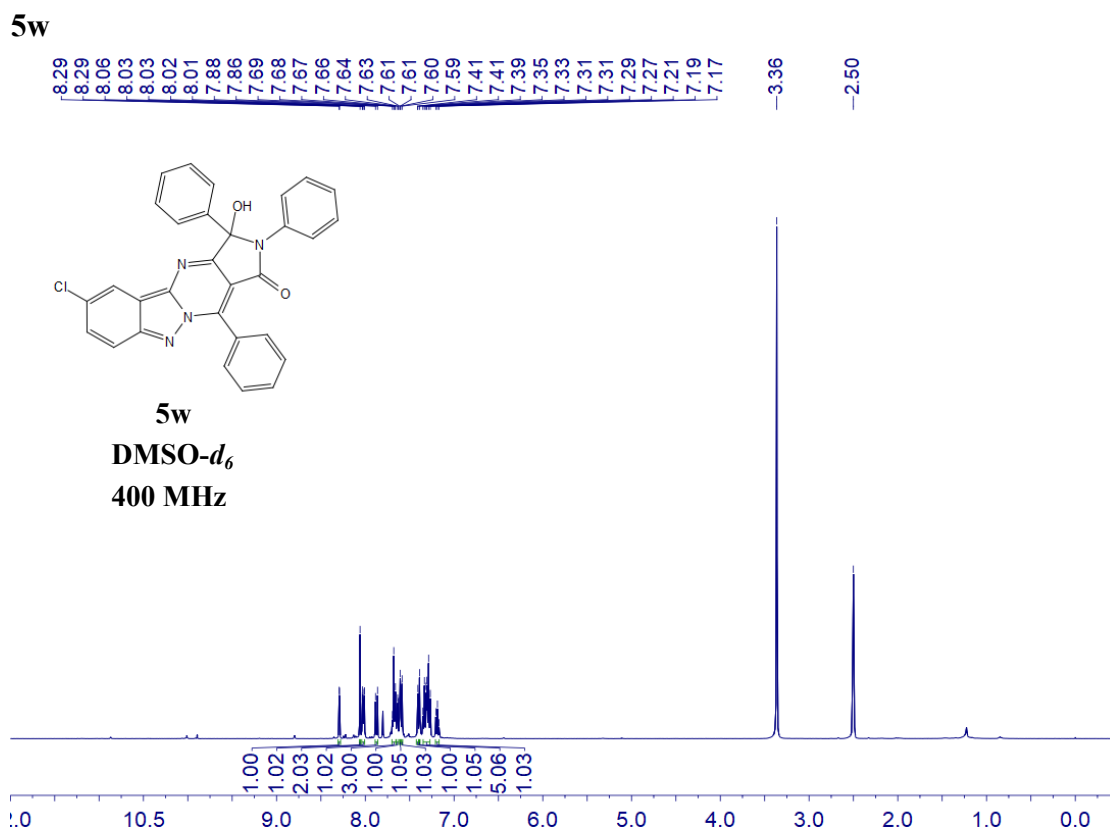



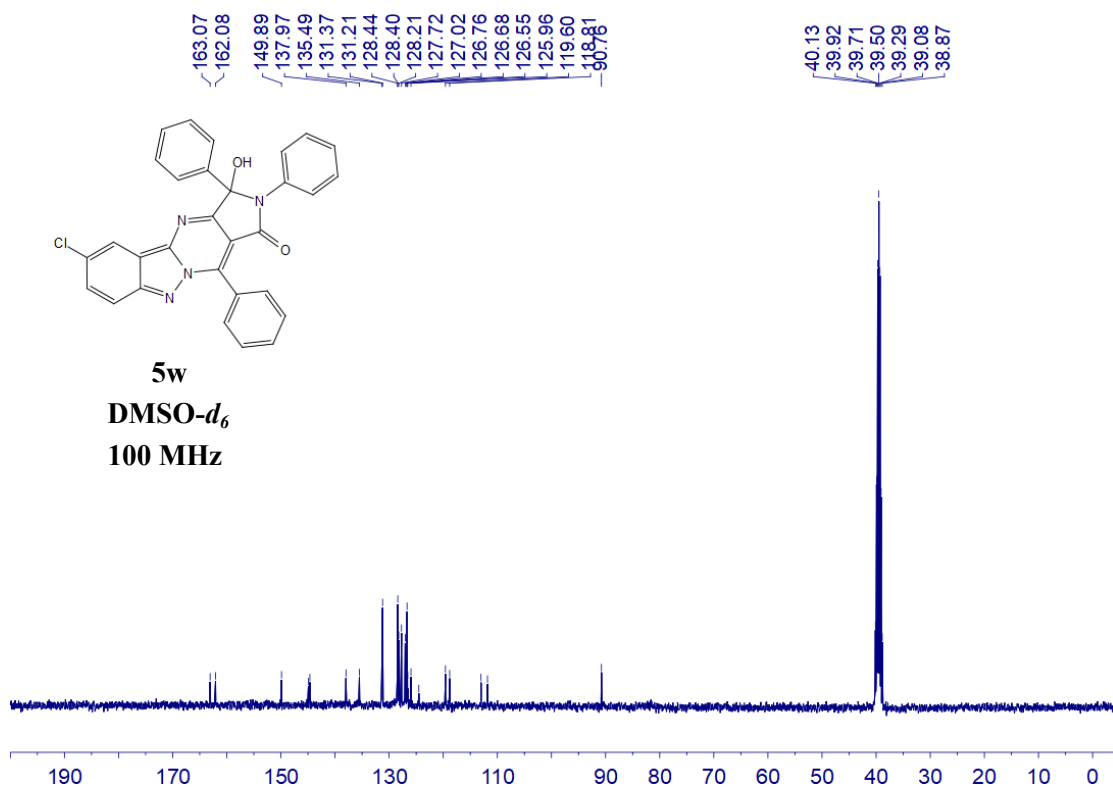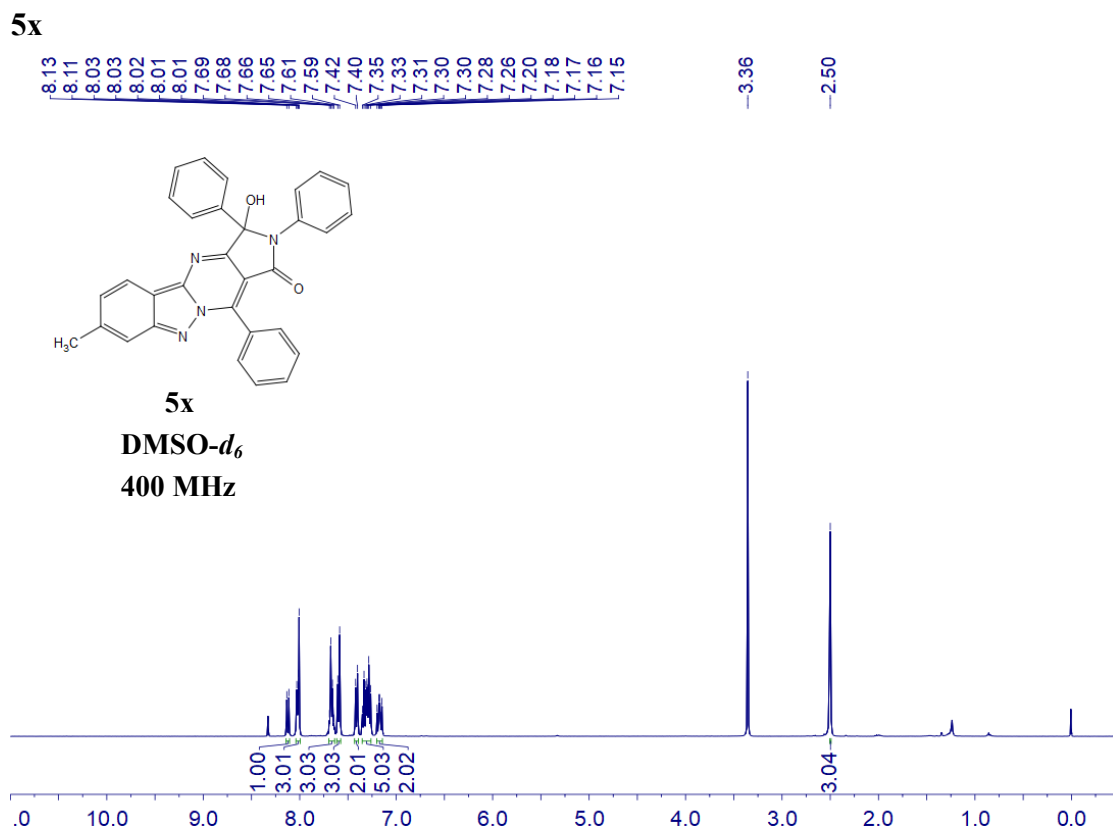

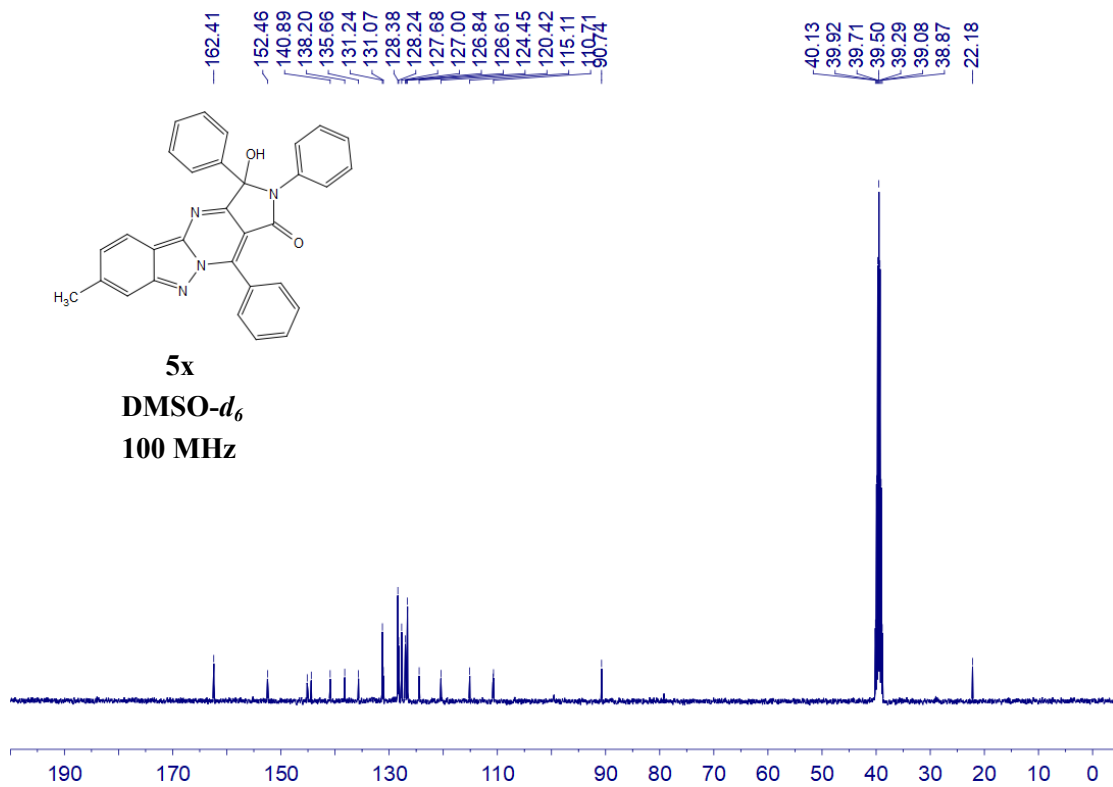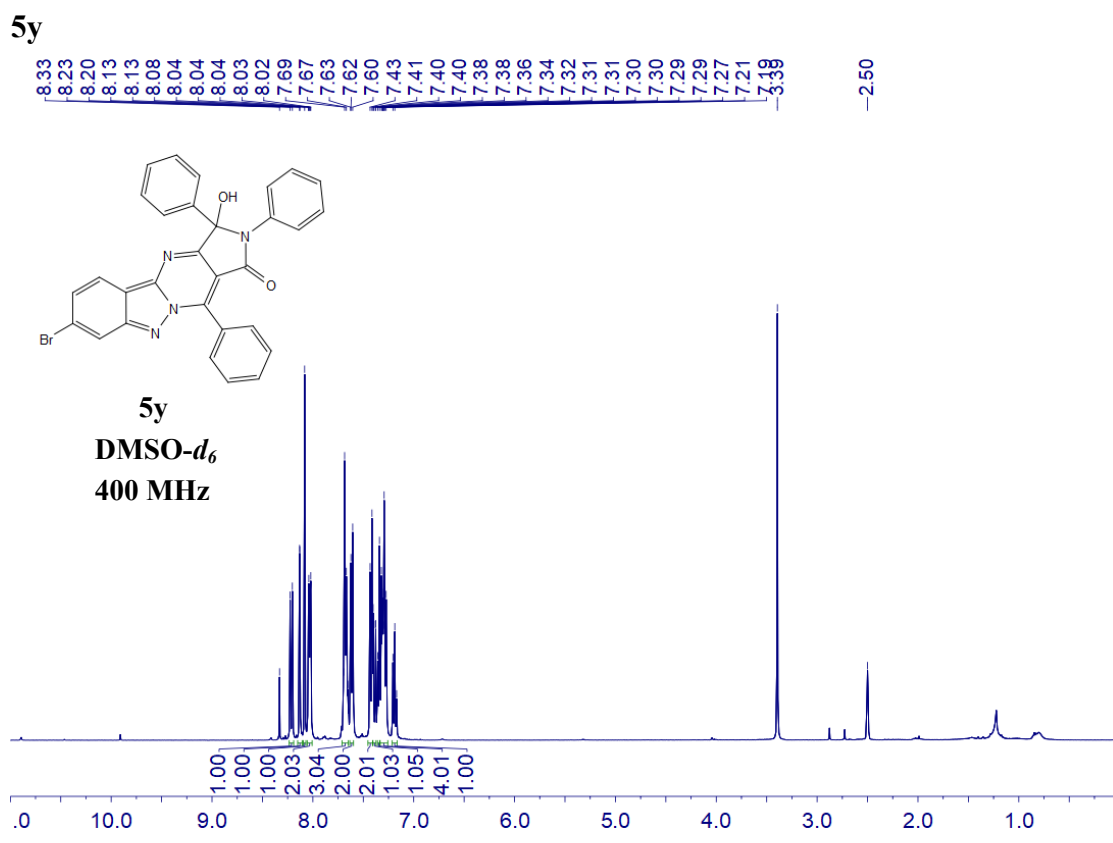

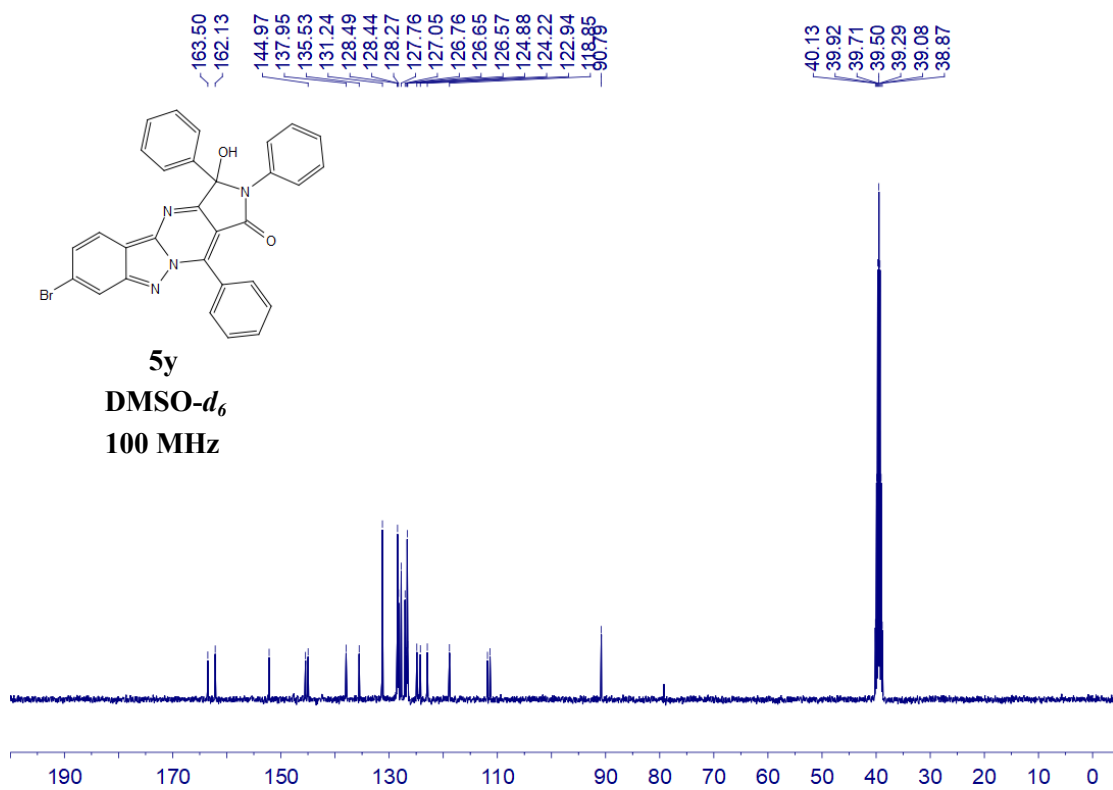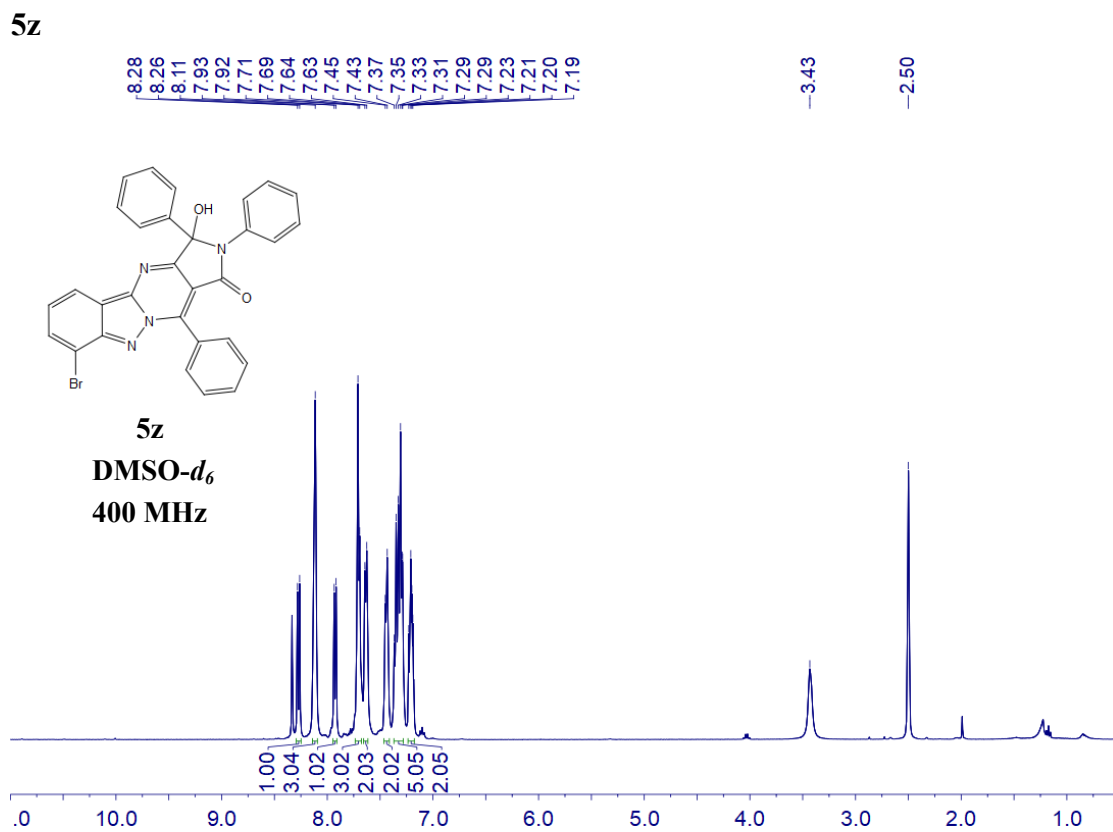

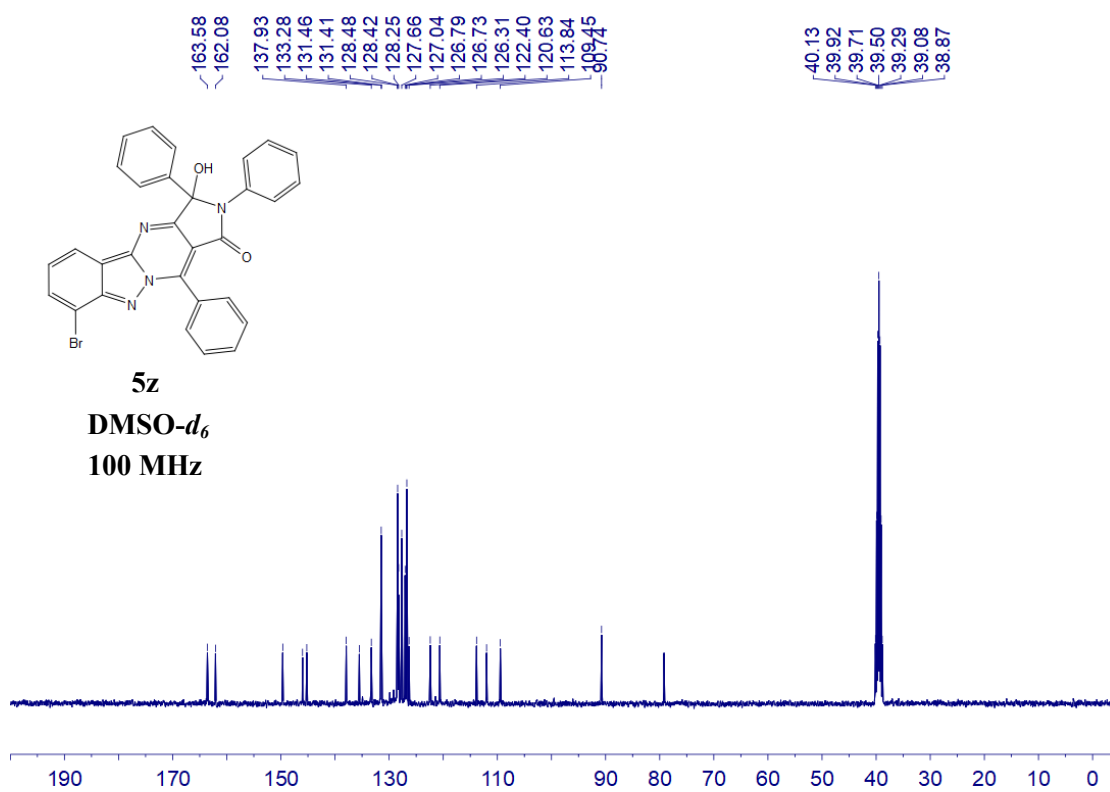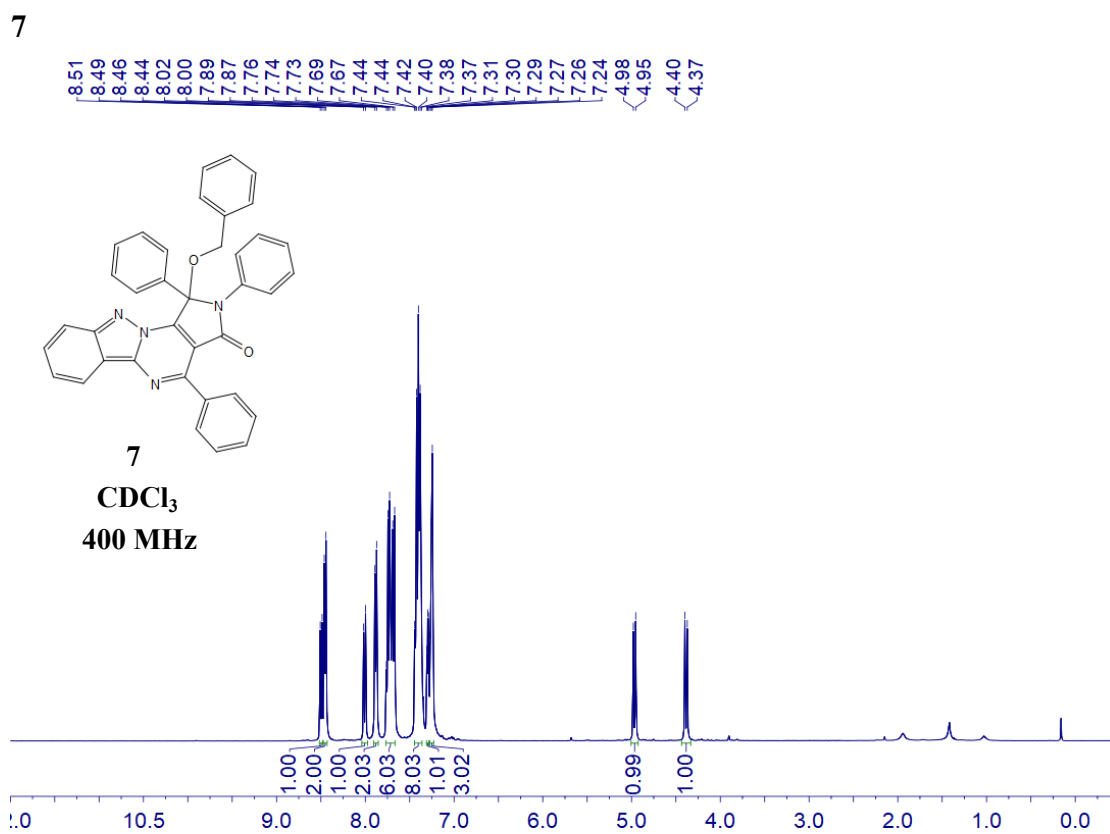

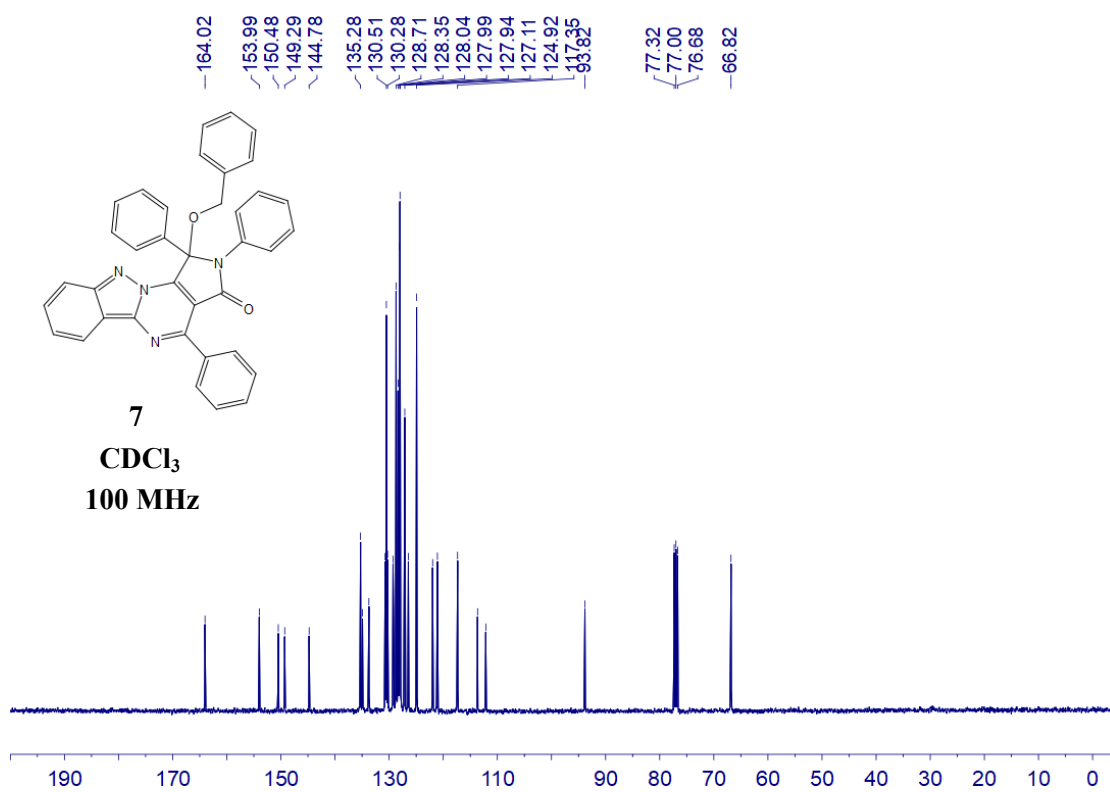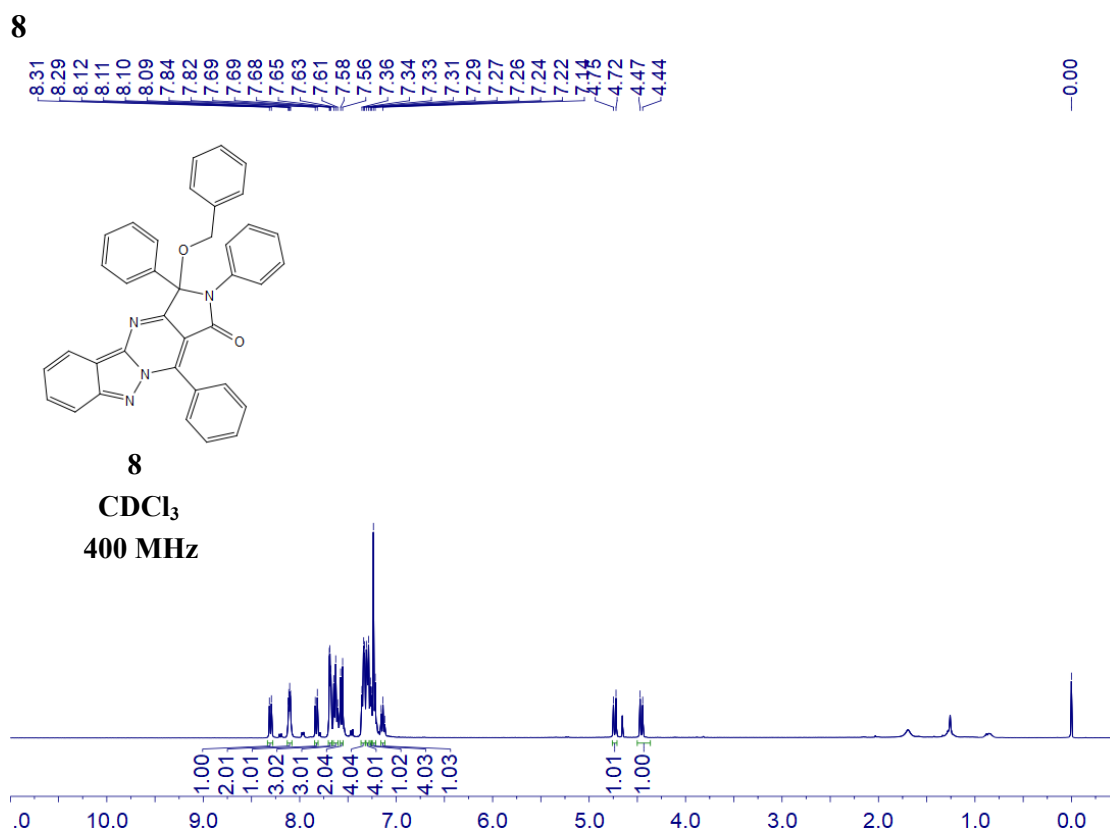

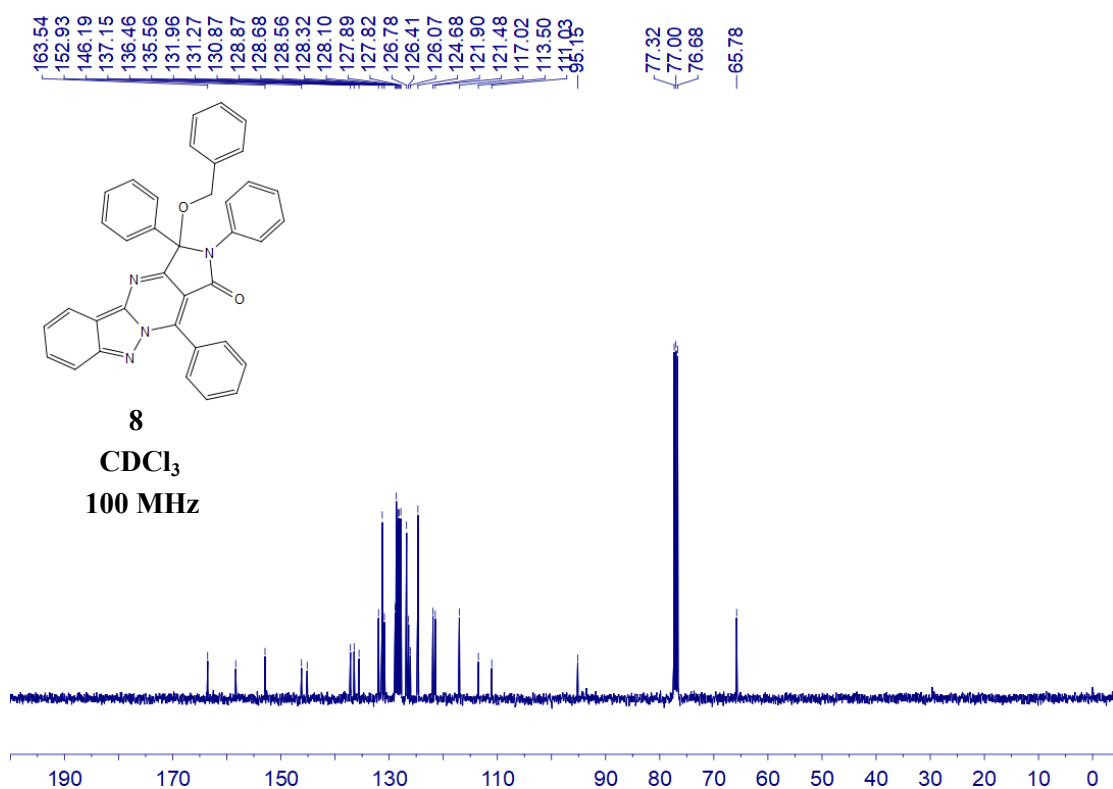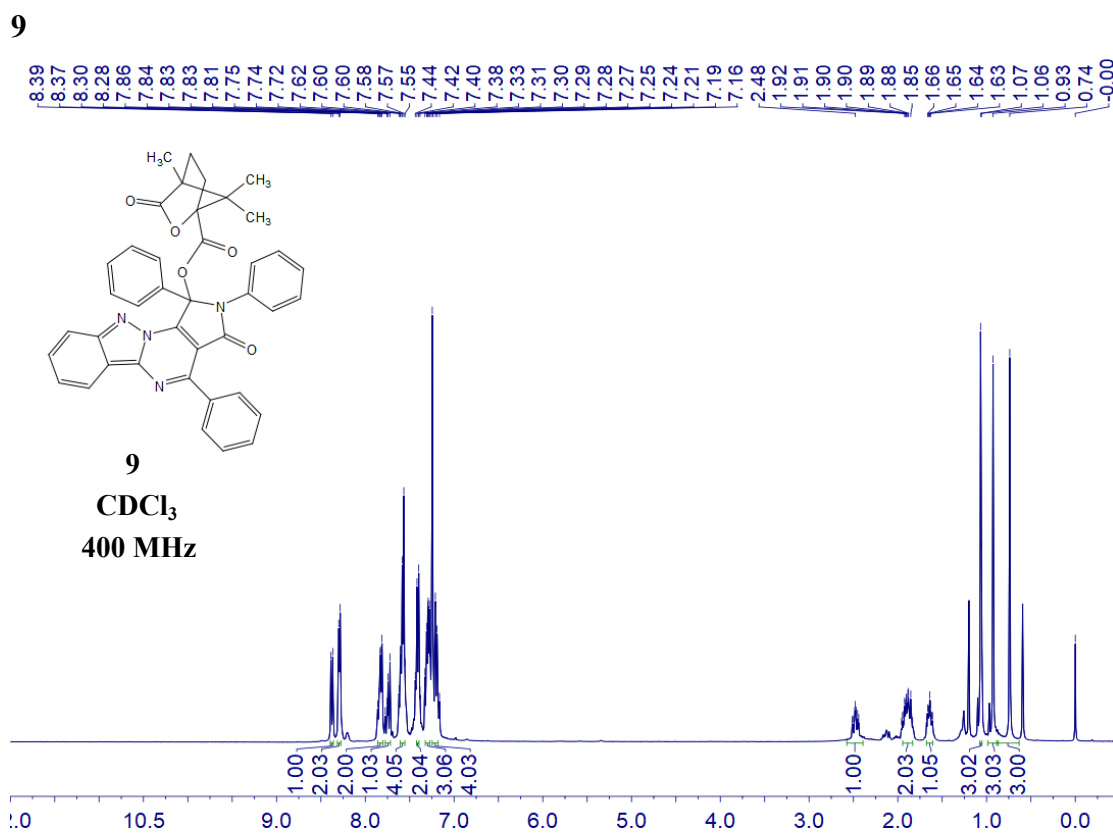

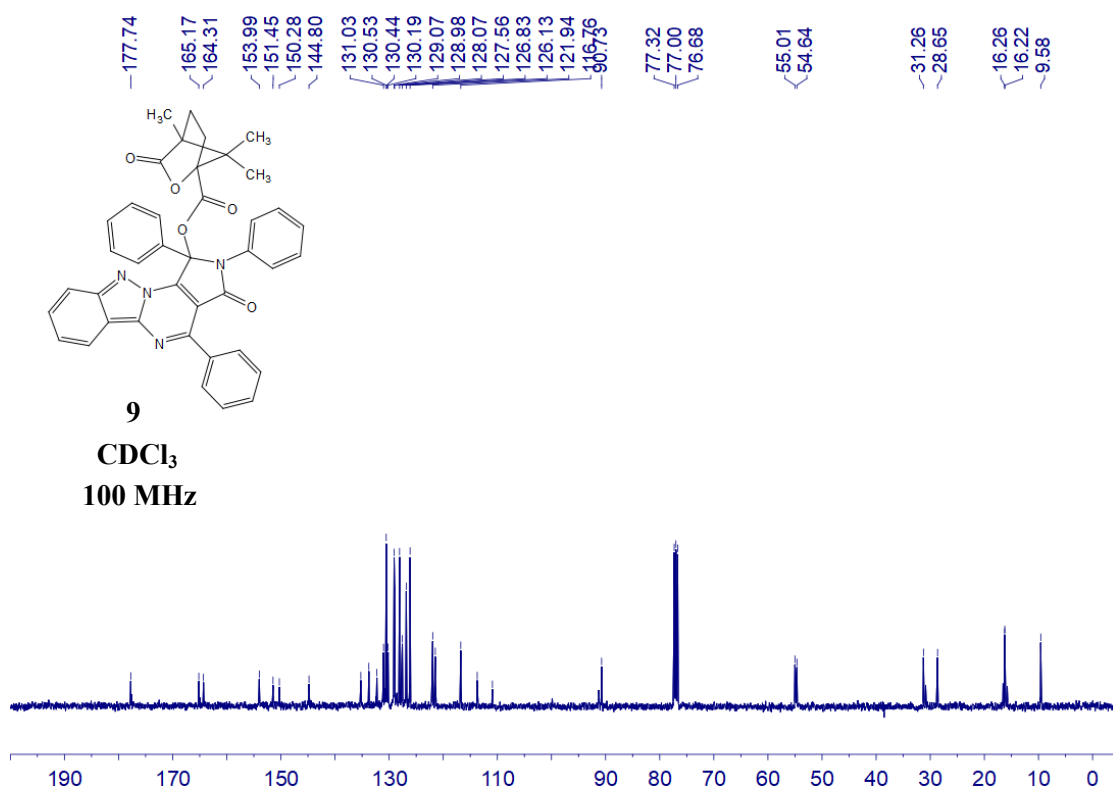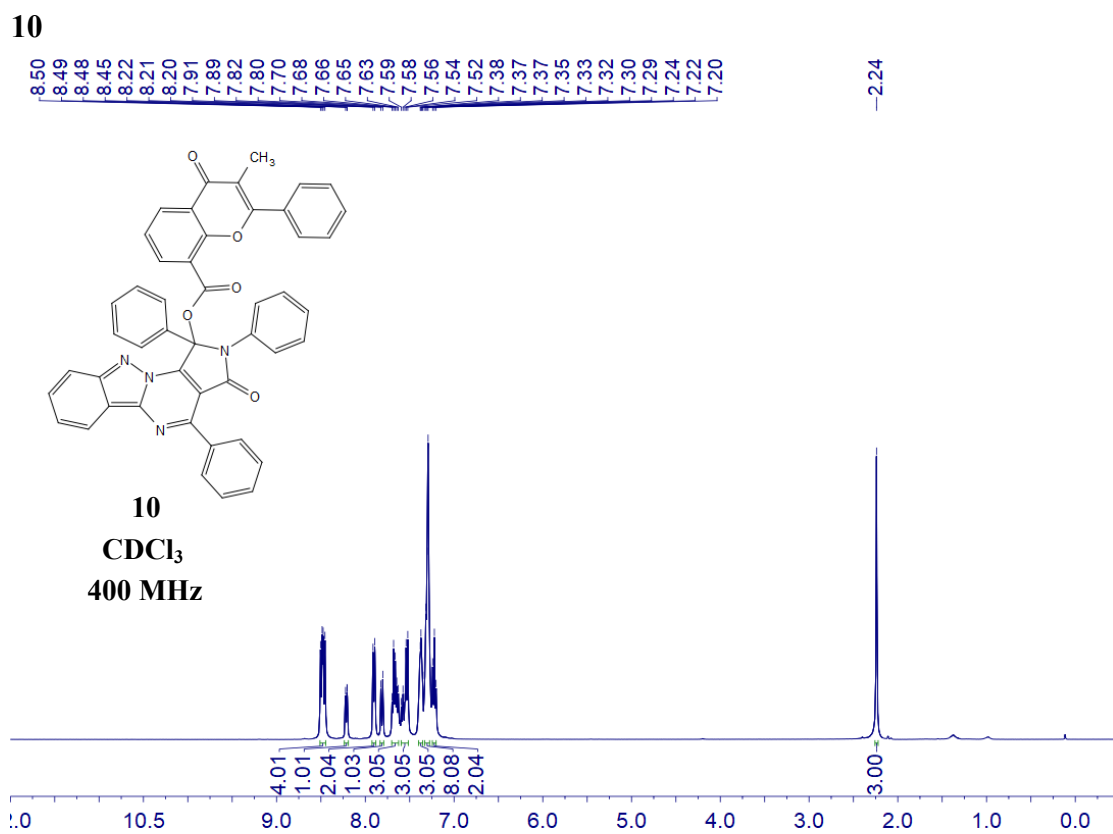

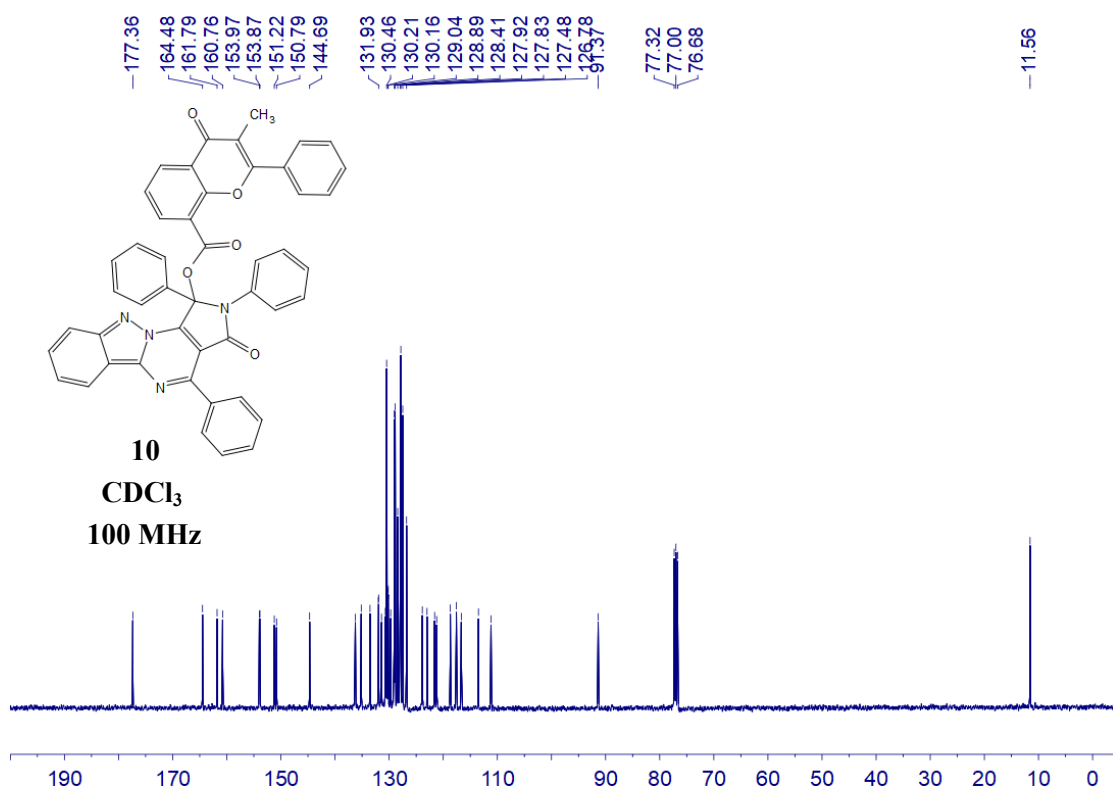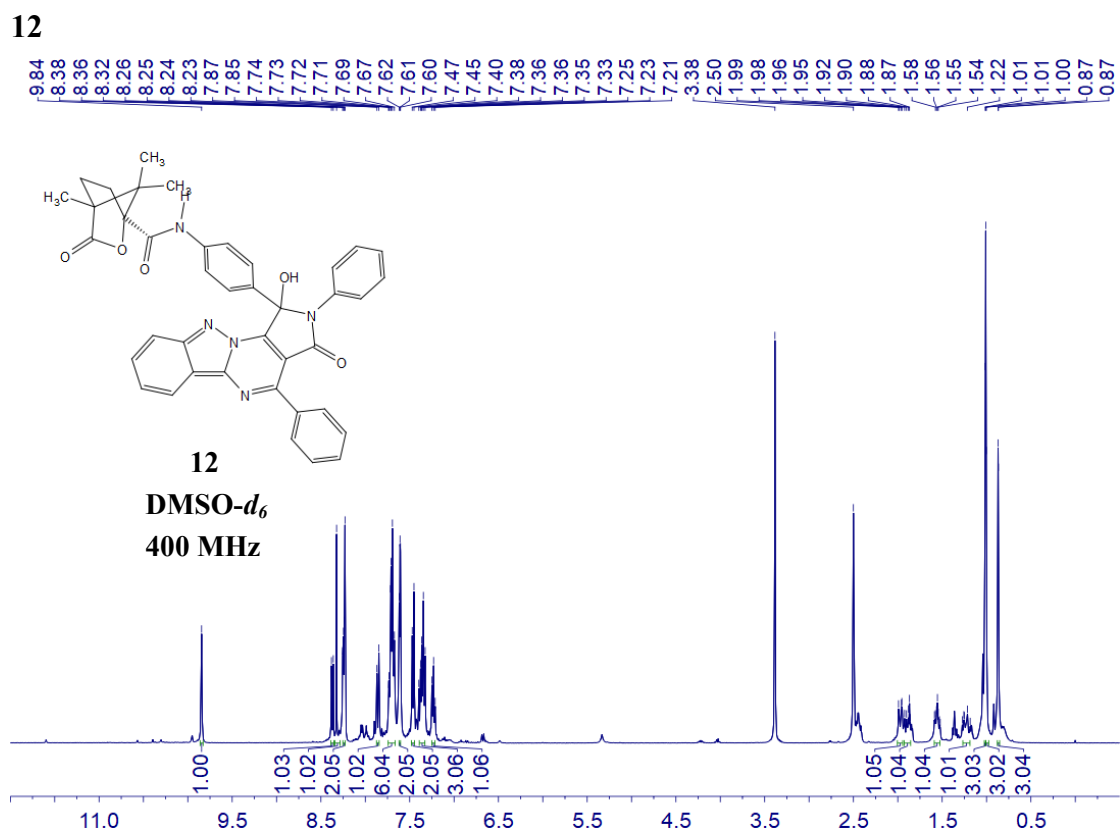



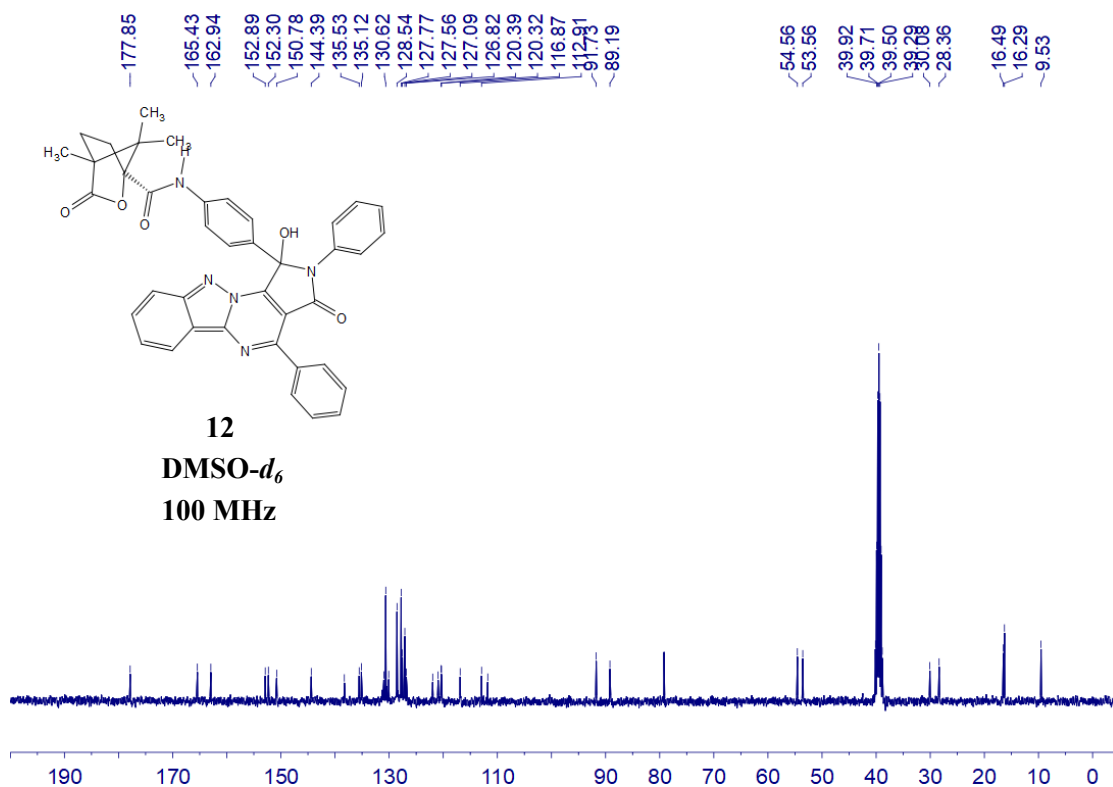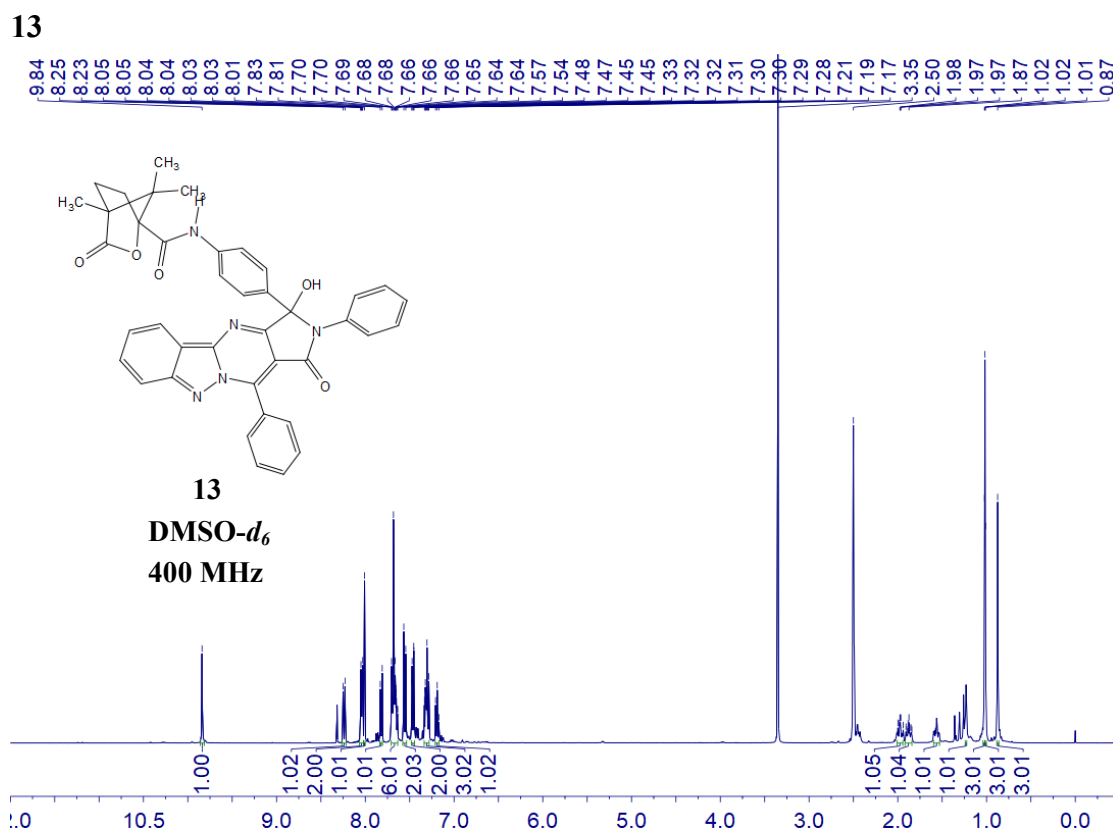

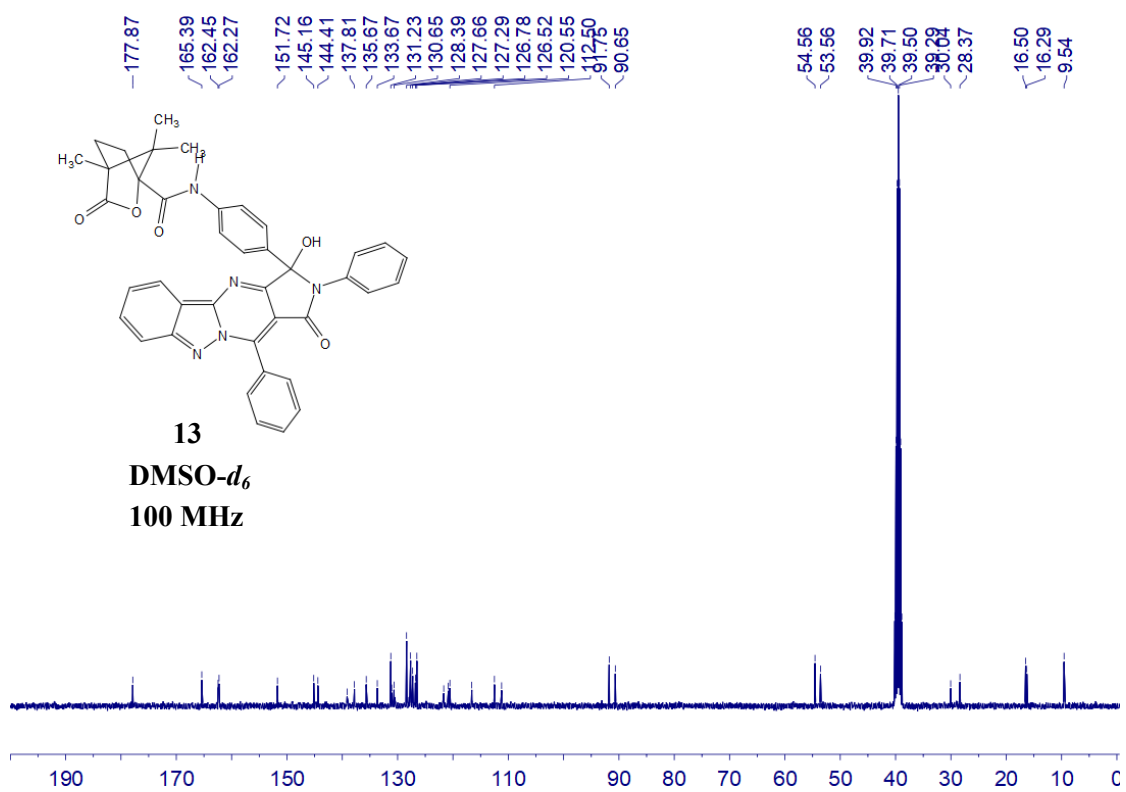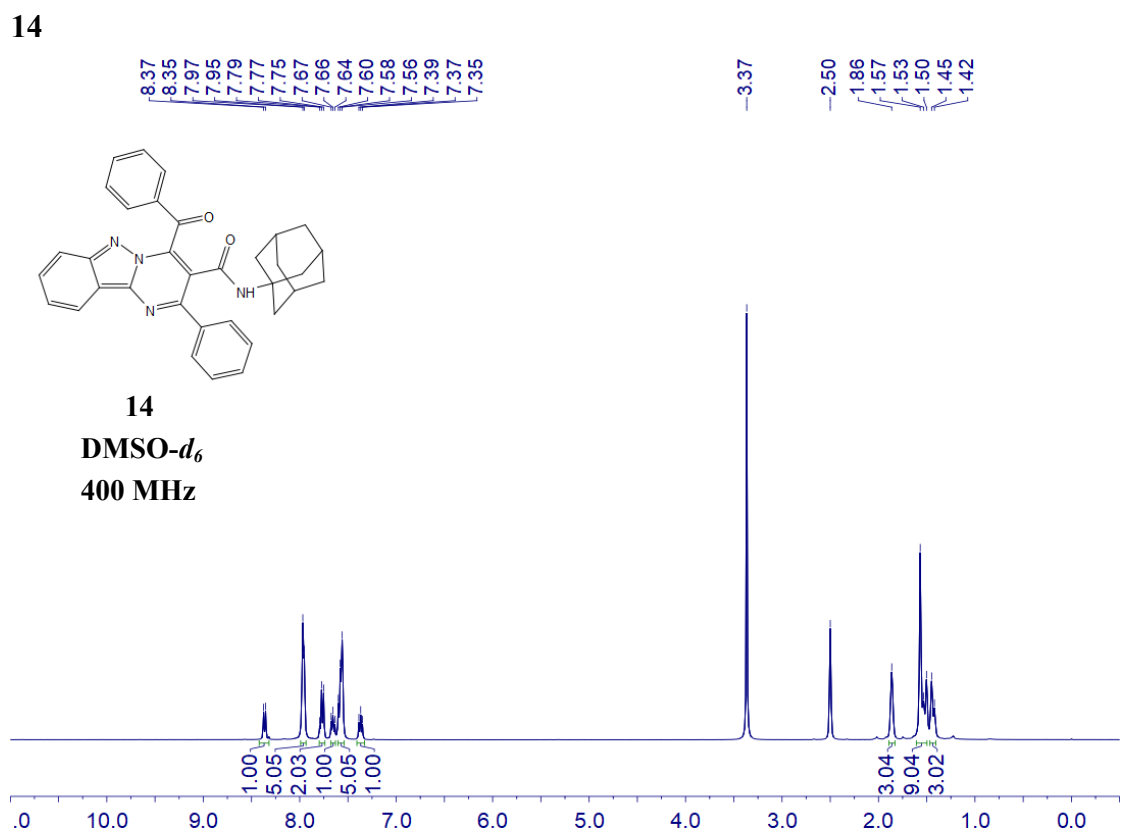

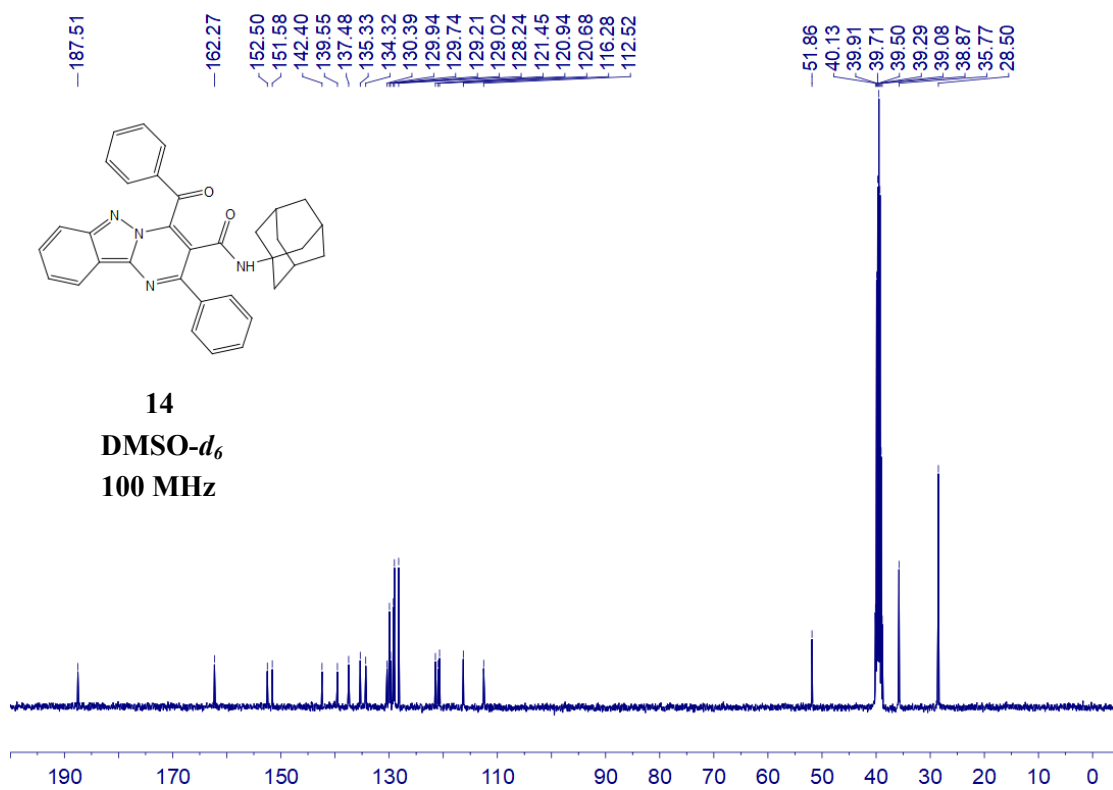

Supplement: d4cc03483j1.pdf [file d4cc03483j1.pdf]
